# Supplementary material for: Retrospective cohort study of clinical characteristics of 2199 hospitalised patients with COVID-19 in New York City
Source: PubMed Central journal article supplement — BMJ Open. 2020 Nov 27;10(11):e040736. doi: 10.1136/bmjopen-2020-040736 (PMC7702220; doi:10.1136/bmjopen-2020-040736), 2020-11-27
Supplement: bmjopen-2020-040736.draft_revisions.pdf [file bmjopen-2020-040736.draft_revisions.pdf]

# BMJ Open

BMJ Open is committed to open peer review. As part of this commitment we make the peer review history of every article we publish publicly available.

When an article is published we post the peer reviewers' comments and the authors' responses online. We also post the versions of the paper that were used during peer review. These are the versions that the peer review comments apply to.

The versions of the paper that follow are the versions that were submitted during the peer review process. They are not the versions of record or the final published versions. They should not be cited or distributed as the published version of this manuscript.

BMJ Open is an open access journal and the full, final, typeset and author-corrected version of record of the manuscript is available on our site with no access controls, subscription charges or pay-per-view fees (<http://bmjopen.bmj.com>).

If you have any questions on BMJ Open's open peer review process please email [info.bmjopen@bmj.com](mailto:info.bmjopen@bmj.com)

# BMJ Open

## Clinical Characteristics of 2,199 Hospitalized COVID-19 Patients in New York City

|                               |                                                                                                                                                                                                                                                                                                                                                                                                                                                                                                                                                                                                                                                                                                                                                                                                                                                                                                                                                                                                                                                                                                                                                                                                                                                                                                                                                                                                                                                                                                                                                                                                                                                                                                                                                                                                                                                                                                                                                                                                                                                                                                                                                                                                                                                                                                                                                                                                                                                                                                                                                                                                                                                                                                                                                                                                                                     |
|-------------------------------|-------------------------------------------------------------------------------------------------------------------------------------------------------------------------------------------------------------------------------------------------------------------------------------------------------------------------------------------------------------------------------------------------------------------------------------------------------------------------------------------------------------------------------------------------------------------------------------------------------------------------------------------------------------------------------------------------------------------------------------------------------------------------------------------------------------------------------------------------------------------------------------------------------------------------------------------------------------------------------------------------------------------------------------------------------------------------------------------------------------------------------------------------------------------------------------------------------------------------------------------------------------------------------------------------------------------------------------------------------------------------------------------------------------------------------------------------------------------------------------------------------------------------------------------------------------------------------------------------------------------------------------------------------------------------------------------------------------------------------------------------------------------------------------------------------------------------------------------------------------------------------------------------------------------------------------------------------------------------------------------------------------------------------------------------------------------------------------------------------------------------------------------------------------------------------------------------------------------------------------------------------------------------------------------------------------------------------------------------------------------------------------------------------------------------------------------------------------------------------------------------------------------------------------------------------------------------------------------------------------------------------------------------------------------------------------------------------------------------------------------------------------------------------------------------------------------------------------|
| Journal:                      | <i>BMJ Open</i>                                                                                                                                                                                                                                                                                                                                                                                                                                                                                                                                                                                                                                                                                                                                                                                                                                                                                                                                                                                                                                                                                                                                                                                                                                                                                                                                                                                                                                                                                                                                                                                                                                                                                                                                                                                                                                                                                                                                                                                                                                                                                                                                                                                                                                                                                                                                                                                                                                                                                                                                                                                                                                                                                                                                                                                                                     |
| Manuscript ID                 | bmjopen-2020-040736                                                                                                                                                                                                                                                                                                                                                                                                                                                                                                                                                                                                                                                                                                                                                                                                                                                                                                                                                                                                                                                                                                                                                                                                                                                                                                                                                                                                                                                                                                                                                                                                                                                                                                                                                                                                                                                                                                                                                                                                                                                                                                                                                                                                                                                                                                                                                                                                                                                                                                                                                                                                                                                                                                                                                                                                                 |
| Article Type:                 | Original research                                                                                                                                                                                                                                                                                                                                                                                                                                                                                                                                                                                                                                                                                                                                                                                                                                                                                                                                                                                                                                                                                                                                                                                                                                                                                                                                                                                                                                                                                                                                                                                                                                                                                                                                                                                                                                                                                                                                                                                                                                                                                                                                                                                                                                                                                                                                                                                                                                                                                                                                                                                                                                                                                                                                                                                                                   |
| Date Submitted by the Author: | 21-May-2020                                                                                                                                                                                                                                                                                                                                                                                                                                                                                                                                                                                                                                                                                                                                                                                                                                                                                                                                                                                                                                                                                                                                                                                                                                                                                                                                                                                                                                                                                                                                                                                                                                                                                                                                                                                                                                                                                                                                                                                                                                                                                                                                                                                                                                                                                                                                                                                                                                                                                                                                                                                                                                                                                                                                                                                                                         |
| Complete List of Authors:     | <p>Paranjpe, Ishan; Icahn School of Medicine at Mount Sinai, The Hasso Plattner Institute for Digital Health at Mount Sinai<br/> Russak, Adam; Icahn School of Medicine at Mount Sinai, The Hasso Plattner Institute for Digital Health at Mount Sinai; Icahn School of Medicine at Mount Sinai, Department of Internal Medicine<br/> De Freitas , Jessica; Icahn School of Medicine at Mount Sinai, The Hasso Plattner Institute for Digital Health at Mount Sinai; Icahn School of Medicine at Mount Sinai Department of Genetics and Genomic Sciences<br/> Lala, Anuradha; Icahn School of Medicine at Mount Sinai, The Zena and Michael A. Wiener Cardiovascular Institute; Icahn School of Medicine at Mount Sinai, Department of Population Health Science and Policy<br/> Miotto, Riccardo; Icahn School of Medicine at Mount Sinai, The Hasso Plattner Institute for Digital Health at Mount Sinai; Icahn School of Medicine at Mount Sinai Department of Genetics and Genomic Sciences<br/> Vaid, Akhil; Icahn School of Medicine at Mount Sinai, The Hasso Plattner Institute for Digital Health at Mount Sinai; Icahn School of Medicine at Mount Sinai Department of Genetics and Genomic Sciences<br/> Johnson, Kipp; Icahn School of Medicine at Mount Sinai, The Hasso Plattner Institute for Digital Health at Mount Sinai; Icahn School of Medicine at Mount Sinai Department of Genetics and Genomic Sciences<br/> Danieletto, Matteo; Icahn School of Medicine at Mount Sinai, The Hasso Plattner Institute for Digital Health at Mount Sinai; Icahn School of Medicine at Mount Sinai Department of Genetics and Genomic Sciences<br/> Golden, Eddy; Icahn School of Medicine at Mount Sinai, The Hasso Plattner Institute for Digital Health at Mount Sinai; Icahn School of Medicine at Mount Sinai Department of Genetics and Genomic Sciences<br/> Meyer, Dara; Icahn School of Medicine at Mount Sinai Department of Genetics and Genomic Sciences<br/> Singh, Manbir; Icahn School of Medicine at Mount Sinai, The Hasso Plattner Institute for Digital Health at Mount Sinai<br/> Somani, Sulaiman ; Icahn School of Medicine at Mount Sinai, The Hasso Plattner Institute for Digital Health at Mount Sinai<br/> Kapoor, Arjun; Icahn School of Medicine at Mount Sinai, The Hasso Plattner Institute for Digital Health at Mount Sinai<br/> O'Hagan, Ross; Icahn School of Medicine at Mount Sinai, The Hasso Plattner Institute for Digital Health at Mount Sinai<br/> Manna, Sayan; Icahn School of Medicine at Mount Sinai, The Hasso Plattner Institute for Digital Health at Mount Sinai<br/> Nangia, Udit; Icahn School of Medicine at Mount Sinai, The Hasso Plattner Institute for Digital Health at Mount Sinai<br/> Jaladanki, Suraj; Icahn School of Medicine at Mount Sinai, The Hasso</p> |

|    |                                                                           |
|----|---------------------------------------------------------------------------|
| 1  |                                                                           |
| 2  |                                                                           |
| 3  |                                                                           |
| 4  | Plattner Institute for Digital Health at Mount Sinai                      |
| 5  | O'Reilly, Paul; Icahn School of Medicine at Mount Sinai Department of     |
| 6  | Genetics and Genomic Sciences; Icahn School of Medicine at Mount          |
| 7  | Sinai, The Pamela Sklar Division of Psychiatric Genomics                  |
| 8  | Huckins, Laura; Icahn School of Medicine at Mount Sinai Department of     |
| 9  | Genetics and Genomic Sciences; Icahn School of Medicine at Mount          |
| 10 | Sinai, The Pamela Sklar Division of Psychiatric Genomics                  |
| 11 | Glowe, Patricia; Icahn School of Medicine at Mount Sinai, The Hasso       |
| 12 | Plattner Institute for Digital Health at Mount Sinai; Icahn School of     |
| 13 | Medicine at Mount Sinai Department of Genetics and Genomic Sciences       |
| 14 | Kia, Arash; Icahn School of Medicine at Mount Sinai, Department of        |
| 15 | Population Health Science and Policy; Icahn School of Medicine at Mount   |
| 16 | Sinai, Institute for Healthcare Delivery Science                          |
| 17 | Timsina, Prem; Icahn School of Medicine at Mount Sinai, Department of     |
| 18 | Population Health Science and Policy; Icahn School of Medicine at Mount   |
| 19 | Sinai, Institute for Healthcare Delivery Science                          |
| 20 | Freeman, Robert; Icahn School of Medicine at Mount Sinai, Department      |
| 21 | of Population Health Science and Policy; Icahn School of Medicine at      |
| 22 | Mount Sinai, Institute for Healthcare Delivery Science                    |
| 23 | Levin, Matthew; Icahn School of Medicine at Mount Sinai Department of     |
| 24 | Genetics and Genomic Sciences; Icahn School of Medicine at Mount          |
| 25 | Sinai, Icahn Institute for Data Science and Genomic Technology,           |
| 26 | Jhang, Jeffrey; Icahn School of Medicine at Mount Sinai, Department of    |
| 27 | Pathology, Molecular and Cell-Based Medicine                              |
| 28 | Firpo, Adolfo; Icahn School of Medicine at Mount Sinai, Department of     |
| 29 | Pathology, Molecular and Cell-Based Medicine                              |
| 30 | Kovatch, Patricia; Icahn School of Medicine at Mount Sinai; Mount Sinai   |
| 31 | Health System, Mount Sinai Data Warehouse                                 |
| 32 | Finkelstein, Joseph; Icahn School of Medicine at Mount Sinai,             |
| 33 | Department of Population Health Science and Policy                        |
| 34 | Aberg, Judith; Icahn School of Medicine at Mount Sinai, Division of       |
| 35 | Infectious Diseases; Icahn School of Medicine at Mount Sinai Department   |
| 36 | of Medicine                                                               |
| 37 | Bagiella, Emilia; Icahn School of Medicine at Mount Sinai, The Zena and   |
| 38 | Michael A. Wiener Cardiovascular Institute; Icahn School of Medicine at   |
| 39 | Mount Sinai, Department of Population Health Science and Policy           |
| 40 | Horowitz, Carol; Icahn School of Medicine at Mount Sinai, Department of   |
| 41 | Population Health Science and Policy; Icahn School of Medicine at Mount   |
| 42 | Sinai Department of Medicine                                              |
| 43 | Murphy, Barbara; Icahn School of Medicine at Mount Sinai Department of    |
| 44 | Medicine                                                                  |
| 45 | Fayad, Zahi; Icahn School of Medicine at Mount Sinai BioMedical           |
| 46 | Engineering and Imaging Institute; Icahn School of Medicine at Mount      |
| 47 | Sinai, Department of Radiology                                            |
| 48 | Narula, Jagat; Icahn School of Medicine at Mount Sinai Department of      |
| 49 | Medicine; Icahn School of Medicine at Mount Sinai, Department of          |
| 50 | Cardiology                                                                |
| 51 | Nestler, Eric; Icahn School of Medicine at Mount Sinai Friedman Brain     |
| 52 | Institute; Icahn School of Medicine at Mount Sinai, The Nash Family       |
| 53 | Department of Neuroscience                                                |
| 54 | Fuster, V; Zena and Michael A. Wiener Cardiovascular Institute and        |
| 55 | Marie-Josée and Henry R. Kravis Center for Cardiovascular Health, Icahn   |
| 56 | School of Medicine at Mount Sinai, New York, NY, USA, Department of       |
| 57 | Medicine, Division of Cardiology                                          |
| 58 | Cordon-Cardo, Carlos; Icahn School of Medicine at Mount Sinai,            |
| 59 | Department of Pathology, Molecular and Cell-Based Medicine                |
| 60 | Charney, Dennis ; Icahn School of Medicine at Mount Sinai Department      |
|    | of Psychiatry; Icahn School of Medicine at Mount Sinai, The Office of the |
|    | Dean                                                                      |
|    | Reich, David; Icahn School of Medicine at Mount Sinai Department of       |
|    | Anesthesiology Perioperative and Pain Medicine                            |

|           |                                                                                                                                                                                                                                                                                                                                                                                                                                                                                                                                                                                                                                                                                                                                                                                                                                                                                                                                                                            |
|-----------|----------------------------------------------------------------------------------------------------------------------------------------------------------------------------------------------------------------------------------------------------------------------------------------------------------------------------------------------------------------------------------------------------------------------------------------------------------------------------------------------------------------------------------------------------------------------------------------------------------------------------------------------------------------------------------------------------------------------------------------------------------------------------------------------------------------------------------------------------------------------------------------------------------------------------------------------------------------------------|
|           | Just, Allan; Icahn School of Medicine at Mount Sinai Department of Environmental Medicine and Public Health; Icahn School of Medicine at Mount Sinai, Institute for Exposomic Research<br>Bottinger, Erwin; Icahn School of Medicine at Mount Sinai, The Hasso Plattner Institute for Digital Health at Mount Sinai<br>Charney, Alexander; Icahn School of Medicine at Mount Sinai Department of Genetics and Genomic Sciences; Icahn School of Medicine at Mount Sinai, The Pamela Sklar Division of Psychiatric Genomics<br>Glicksberg, Benjamin; Icahn School of Medicine at Mount Sinai Department of Genetics and Genomic Sciences, Genetics and Genomics Sciences; Icahn School of Medicine at Mount Sinai, The Hasso Plattner Institute for Digital Health at Mount Sinai<br>Nadkarni, GN ; Icahn School of Medicine at Mount Sinai, The Hasso Plattner Institute for Digital Health at Mount Sinai; Icahn School of Medicine at Mount Sinai Department of Medicine |
| Keywords: | INFECTIOUS DISEASES, Public health < INFECTIOUS DISEASES, INTERNAL MEDICINE                                                                                                                                                                                                                                                                                                                                                                                                                                                                                                                                                                                                                                                                                                                                                                                                                                                                                                |
|           |                                                                                                                                                                                                                                                                                                                                                                                                                                                                                                                                                                                                                                                                                                                                                                                                                                                                                                                                                                            |

SCHOLARONE™  
Manuscripts

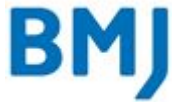

I, the Submitting Author has the right to grant and does grant on behalf of all authors of the Work (as defined in the below author licence), an exclusive licence and/or a non-exclusive licence for contributions from authors who are: i) UK Crown employees; ii) where BMJ has agreed a CC-BY licence shall apply, and/or iii) in accordance with the terms applicable for US Federal Government officers or employees acting as part of their official duties; on a worldwide, perpetual, irrevocable, royalty-free basis to BMJ Publishing Group Ltd ("BMJ") its licensees and where the relevant Journal is co-owned by BMJ to the co-owners of the Journal, to publish the Work in this journal and any other BMJ products and to exploit all rights, as set out in our [licence](#).

The Submitting Author accepts and understands that any supply made under these terms is made by BMJ to the Submitting Author unless you are acting as an employee on behalf of your employer or a postgraduate student of an affiliated institution which is paying any applicable article publishing charge ("APC") for Open Access articles. Where the Submitting Author wishes to make the Work available on an Open Access basis (and intends to pay the relevant APC), the terms of reuse of such Open Access shall be governed by a Creative Commons licence – details of these licences and which [Creative Commons](#) licence will apply to this Work are set out in our licence referred to above.

Other than as permitted in any relevant BMJ Author's Self Archiving Policies, I confirm this Work has not been accepted for publication elsewhere, is not being considered for publication elsewhere and does not duplicate material already published. I confirm all authors consent to publication of this Work and authorise the granting of this licence.

**Title:** Clinical Characteristics of 2,199 Hospitalized COVID-19 Patients in New York City

**Authors:**

Ishan Paranjpe, BS<sup>1+</sup>, Adam J Russak, MD<sup>1,2+</sup>, Jessica K De Freitas, BS<sup>1,3+</sup>, Anuradha Lala, MD<sup>4,5+</sup>, Riccardo Miotto, PhD<sup>1,3</sup>, Akhil Vaid, MD<sup>1,3</sup>, Kipp W Johnson, PhD<sup>1,3</sup>, Matteo Danieletto, PhD<sup>1,3</sup>, Eddy Golden, BS<sup>1,3</sup>, Dara Meyer, BS<sup>3</sup>, Manbir Singh, BS<sup>1</sup>, Sulaiman Somani, BS<sup>1</sup>, Arjun Kapoor, MA<sup>1</sup>, Ross O'Hagan, BS<sup>1</sup>, Sayan Manna, BS<sup>1</sup>, Udit Nangia, BS<sup>1</sup>, Suraj Jaladanki, BS<sup>1</sup>, Paul F O'Reilly, PhD<sup>3,6,7</sup>, Laura M Huckins, PhD<sup>3,6,7</sup>, Patricia Glowe, BS<sup>1,3</sup>, Arash Kia, PhD<sup>5,8</sup>, Prem Timsina, PhD<sup>5,8</sup>, Robert M Freeman, MS<sup>5,8</sup>, Matthew A Levin, MD<sup>3,5,8,10</sup>, Jeffrey Jhang, MD<sup>9</sup>, Adolfo Firpo, MD<sup>9</sup>, Patricia Kovatch, PhD<sup>11</sup>, Joseph Finkelstein, PhD<sup>5</sup>, Judith A Aberg, MD<sup>12,13</sup>, Emilia Bagiella, PhD<sup>4,5</sup>, Carol R Horowitz, PhD<sup>5,13</sup>, Barbara Murphy, MD<sup>13</sup>, Zahi A Fayad, PhD<sup>15,16</sup>, Jagat Narula, MD PhD<sup>13,17</sup>, Eric J Nestler, MD PhD<sup>18,19</sup>, Valentin Fuster, MD PhD<sup>4,17</sup>, Carlos Cordon-Cardo, MD PhD<sup>9</sup>, Dennis S Charney, MD PhD<sup>20</sup>, David L Reich, MD<sup>21</sup>, Allan C Just, PhD<sup>22,23</sup>, Erwin P Bottinger, MD<sup>1\*</sup>, Alexander W Charney, MD PhD<sup>3,6,7,\*</sup>, Benjamin S Glicksberg, PhD<sup>1,3,6\*</sup>, Girish N Nadkarni, MD<sup>1,13,24\*</sup>, on behalf of the Mount Sinai COVID Informatics Center (MSCIC)

**Affiliations:**

1. The Hasso Plattner Institute for Digital Health at Mount Sinai,
2. Department of Internal Medicine,
3. Department of Genetics and Genomic Sciences,
4. The Zena and Michael A. Wiener Cardiovascular Institute,
5. Department of Population Health Science and Policy,
6. The Pamela Sklar Division of Psychiatric Genomics,
7. The Department of Psychiatry,
8. Institute for Healthcare Delivery Science,
9. Department of Pathology, Molecular and Cell-Based Medicine
10. Icahn Institute for Data Science and Genomic Technology,
11. Mount Sinai Data Warehouse,
12. Division of Infectious Diseases,
13. Department of Medicine,
14. The Charles Bronfman Institute for Personalized Medicine,
15. The BioMedical Engineering and Imaging Institute,
16. Department of Radiology,
17. Department of Cardiology,
18. The Nash Family Department of Neuroscience,
19. The Friedman Brain Institute,
20. The Office of the Dean,
21. Department of Anesthesiology, Perioperative and Pain Medicine,
22. Department of Environmental Medicine and Public Health,
23. Institute for Exposomic Research,
24. The Charles Bronfman Institute for Personalized Medicine, Icahn School of Medicine at Mount Sinai

+ These authors contributed equally

1  
2  
3 \* These authors jointly supervised this work  
4

5 **Correspondence:**  
6

7  
8 Please address correspondence to:  
9

10 Ishan Paranjpe  
11 Ishan.paranjpe@icahn.mssm.edu  
12  
13  
14  
15

16 **Words: 2726**  
17

18 **Funding:**

19 This work was Supported by U54 TR001433-05, National Center for Advancing  
20 Translational Sciences, National Institutes of Health.  
21  
22  
23  
24  
25  
26  
27  
28  
29  
30  
31  
32  
33  
34  
35  
36  
37  
38  
39  
40  
41  
42  
43  
44  
45

46 **ABSTRACT**  
47  
48  
49

50 **Objective:**

51 The coronavirus 2019 (COVID-19) pandemic is a global public health crisis, with over 3  
52 million cases and 200,000 deaths worldwide. Data are needed regarding the clinical  
53 course of hospitalized patients, particularly in the United States.

54 We aimed to compare clinical characteristic of COVID-19 patients who had in-hospital  
55 mortality with those who were discharged alive.  
56  
57  
58  
59  
60

1  
2  
3  
4 **Design:** Demographic, clinical, and outcomes data for patients admitted to five Mount  
5 Sinai Health System hospitals with confirmed COVID-19 between February 27 and April  
6 2, 2020 were identified through institutional electronic health records. We performed a  
7 retrospective comparative analysis of patients who had in-hospital mortality or were  
8 discharged alive.  
9

#### 10 **Setting:**

11 All patients were admitted to the Mount Sinai Health System, a large quaternary care  
12 urban hospital system.  
13

#### 14 **Participants:**

15 Participants over the age of 18 years were included.  
16

#### 17 **Primary Outcomes:**

18 We investigated in-hospital mortality during the study period.  
19

#### 20 **Results**

21 A total of 2,199 patients with COVID-19 were hospitalized during the study period. As of  
22 April 2<sup>nd</sup>, 1,121 (51%) patients remained hospitalized, and 1,078 (49%) completed their  
23 hospital course. Of the latter, the overall mortality was 29%, and 36% required intensive  
24 care. The median age was 65 years overall and 75 years in those who died. Pre-  
25 existing conditions were present in 65% of those who died and 46% of those  
26 discharged. In those who died, the admission median lymphocyte percentage was  
27 11.7%, D-dimer was 2.4 ug/ml, C-reactive protein was 162 mg/L, and procalcitonin was  
28 0.44 ng/mL. In those discharged, the admission median lymphocyte percentage was  
29 16.6%, D-dimer was 0.93 ug/ml, C-reactive protein was 79 mg/L, and procalcitonin was  
30 0.09 ng/mL.  
31  
32  
33  
34  
35

#### 36 **Conclusions**

37 In our cohort of hospitalized patients, requirement of intensive care and mortality were  
38 high. Patients who died typically had more pre-existing conditions and greater  
39 perturbations in inflammatory markers as compared to those who were discharged.  
40  
41  
42

#### 43 **Strengths and limitations of this study:**

- 44 • We identify factors associated with in-hospital mortality in a diverse cohort
  - 45 • Our study leverages longitudinal electronic health records
  - 46 • Our study is limited by the short followup time period
- 47  
48

#### 49 **INTRODUCTION**

50  
51 The Coronavirus disease (COVID-19) pandemic, caused by severe acute respiratory  
52 syndrome coronavirus-2 (SARS-CoV-2), has held the world at a standstill with its  
53 virulence. As of April 27, 2020, over 3 million people have been affected, and more than  
54 200,000 patients have died worldwide<sup>1</sup>. In addition to being highly contagious, the  
55  
56  
57  
58  
59  
60



disease manifestations and clinical course are variable, spanning from asymptomatic status to severe acute respiratory distress syndrome with multiorgan failure and death<sup>2</sup>.

Reports from China and Italy provided early data on disease presentation and management<sup>3,4</sup> but also revealed varying geographic disease expressions. Nearly one-third of the world's cases are now in the United States (US), and with nearly one-third of those cases located in New York, it represents the current epicenter of the COVID-19 pandemic<sup>5</sup>.

As the number of cases continues to climb, hospitals are being stretched well-beyond capacity while facing challenges of insufficient personal protective equipment (PPE), ventilators, and workforce. Thus, understanding the clinical course of hospitalized COVID-19 patients is critical not only for providing optimal patient care but also to inform resource management in other locations across the US likely to experience similar case surges<sup>6</sup>. Data specifically examining differences in admission laboratory data in patients who died as compared to those who were ultimately discharged is lacking.

The Mount Sinai Healthcare System (MSHS) is the largest academic health system in New York City and serves as an ideal platform to better understand the evolving landscape of COVID-19 across a diverse population. Here, we present the largest case series of patients hospitalized with laboratory confirmed COVID-19 to date in the US.

## **METHODS**

### **Patient involvement**

Patients and the public were not directly involved in the study design or implementation.

### **Study Population**

The MSHS serves a large, racially and ethnically diverse patient population. In this study, patient data came from 5 major hospitals: the Mount Sinai Hospital located in East Harlem, Manhattan; Mount Sinai Morningside located in Morningside Heights, Manhattan; Mount Sinai West located in Midtown and the West Side, Manhattan; Mount Sinai Brooklyn located in Midwood, Brooklyn; and Mount Sinai Queens located in Astoria, Queens. We included patients who were at least 18 years old, had a laboratory-confirmed COVID-19 infection, and were admitted to any of the aforementioned 5 MSHS hospitals between February 27 and 12 a.m. April 2, 2020 (time of data freeze). A confirmed case of COVID-19 was defined by a positive reverse transcriptase polymerase chain reaction (RT-PCR) assay of a specimen collected via nasopharyngeal swab. The Mount Sinai Institutional Review Board approved this research under a broad regulatory protocol allowing for analysis of limited patient-level data.

### **Data Collection**

The dataset was obtained from different sources and aggregated by the New York Covid Informatics Taskforce (NYCIT) (Further description of NYCIT is provided in Supplementary Material). We obtained demographics, diagnosis codes (International

1  
2  
3 Classification of Diseases-9/10-Clinical Modification (ICD-9/10-CM) codes and  
4 procedures, as well as vital signs and laboratory measurements during hospitalization.  
5 Demographics included age, sex, and language, as well as race and ethnicity in the  
6 electronic health records. Racial groups included White, Black or African American,  
7 Asian, Pacific Islander, Other, and Unknown. Ethnic groups included Non-  
8 Hispanic/Latino, Hispanic/Latino, or Unknown. All vital signs and laboratory values were  
9 obtained as part of indicated clinical care.  
10  
11

### 12 **Definitions of Pre-existing Conditions**

13 We defined a pre-existing condition as the presence of diagnosis codes associated with  
14 specific diseases. Diagnoses and corresponding ICD codes are provided in  
15

### 16 **Supplemental Table 1.**

### 17 **Definitions of Outcomes**

18 We assessed in-hospital mortality and admission to intensive care.  
19  
20

### 21 **Statistical Analysis**

22 Results are reported as medians and interquartile ranges or means and standard  
23 deviations, as appropriate. Categorical variables were summarized as counts and  
24 percentages. Statistical significance was evaluated using a Wilcoxon test for continuous  
25 variables and a Fisher-exact test for categorical variables. We visualized length of stay  
26 (LOS) using a cumulative incidence function with competing risks for mutually exclusive  
27 events of in-hospital mortality or discharge. Patients who were still hospitalized at the  
28 time of data freeze were regarded as having a censored LOS. We assumed censored  
29 observations from patients with ongoing hospitalization will not exceed the longest LOS  
30 in our dataset when calculating the restricted mean LOS. No imputation was made for  
31 missing data. Analysis was performed with R<sup>7</sup>.  
32  
33  
34  
35

## 36 **RESULTS**

37  
38 A consort diagram of included patients and outcomes is depicted in **Supplementary**  
39 **Figure 1.**  
40

### 41 Demographic and Clinical Characteristics

42 From February 27 to April 2, 2020, 2,199 COVID-19 positive patients were hospitalized  
43 at one of five MSHS New York City hospitals. At the time of writing this report, 1,121  
44 (51%) patients remained hospitalized and 1,078 (49%) completed their hospital course,  
45 with 768 discharges and 310 deaths. **Figure 1** details the number of patients admitted  
46 to the hospital per day and the total number of patients admitted cumulatively over time.  
47 During the study period, the trend of hospital admissions per day consistently increased.  
48  
49  
50

51 Patient demographics, pre-existing conditions as well as vital signs and laboratory  
52 values at the time of admission are displayed in Table 1. Median age was 65 years with  
53 only 3% of patients less than 30 years and 36% over 70 years. The proportion of men  
54 was higher (59%) than women (41%) and 25% had their race identified as White, 25%  
55 as African American, and 3% as Asian. One quarter of the population has their ethnicity  
56  
57  
58  
59  
60

1  
2  
3 identified as Hispanic/Latino. More than half of the population had at least one pre-  
4 existing condition. Specifically, 37% presented with a history of hypertension, 27% with  
5 diabetes mellitus, 16% with coronary artery disease, 10% with heart failure and 9% with  
6 chronic kidney disease.  
7  
8  
9  
10

### 11 Laboratory Results and Vital Signs at Presentation

12 Overall, 1,558 (71%) of patients were admitted through the emergency department. On  
13 hospital admission, 39% of all patients were tachycardic and 25% of all patients were  
14 febrile (**Table 1**). The median white blood cell count was 7 K/uL and lymphocyte  
15 percentage was 13.8. The median serum creatinine was 1 mg/dL. Select inflammatory  
16 markers performed in subsets of patients in accordance with clinical indication were  
17 markedly elevated on admission (**Table 1**). Specifically, the median C-reactive protein  
18 (CRP) was 110 mg/L, lactate dehydrogenase (LDH) was 416 U/L, and ferritin was 714  
19 ng/L. Over one-quarter of patients (28%) had a procalcitonin level above 0.49 ng/mL,  
20 and nearly half of patients (46%) had a procalcitonin level less than 0.15 ng/mL. The  
21 median D-dimer was 1.31 ug/mL; one-third of patients (33%) had a D-dimer greater  
22 than 2 ug/mL.  
23  
24  
25

26 The frequencies of otherwise non-routine laboratory assessments ordered on day of  
27 admission increased over time and are shown in **Supplementary Figure 2**. In contrast,  
28 hemoglobin, a routinely measured clinical lab value, was ordered at admission in the  
29 majority of patients without variation over the study period.  
30  
31

### 32 Clinical Outcomes

33 Due to the unknown future clinical course of those patients hospitalized at the time of  
34 data freeze, below we present clinical characteristics of only those patients who had  
35 completed their hospital course. A total of 1,078 COVID-19 confirmed hospitalized  
36 patients completed their hospital course (died or discharged alive) by the date of data  
37 freeze on April 02, 2020. Of these, 768 (71%) were discharged and 310 (29%) died in  
38 the hospital. Estimates for mortality and need for ICU admissions over time are  
39 displayed in **Figure 2**.  
40  
41

42 The median LOS was 7.7 days, accounting for censoring of patients with ongoing  
43 hospitalization. By the mean LOS (10.5 days), 45% of patients had been discharged,  
44 17% had died, and 38% were still hospitalized (**Figure 2**). Demographics and admission  
45 laboratory measurements for patients who completed their hospital course are  
46 displayed in **Table 2**, stratified by mortality. The median age was significantly greater in  
47 those who died as compared to those who were discharged (75 years vs 59 years;  
48  $p<0.001$ ). Pre-existing conditions were present in 64% of those who died and 46% of  
49 those discharged. We observed a significantly greater prevalence of diabetes (34% vs  
50 20%;  $p=0.004$ ), chronic obstructive pulmonary disease (9% vs 4%;  $p=0.002$ ), heart  
51 failure (21% vs 7%;  $p<0.001$ ), stroke (10% vs 5%;  $p=0.004$ ), and hypertension (45% vs  
52 30%;  $p<0.001$ ) in those who died as compared to those who were discharged.  
53 Prevalence of other comorbidities are provided in **Table 2**.  
54  
55  
56  
57  
58  
59  
60

We present key laboratory markers at the time of hospital admission in subsets of patients for whom they were measured. Patients who died had a significantly lower median lymphocyte percentage (11.7% vs 16.6%;  $p < 0.001$ ) and greater aspartate aminotransferase (AST) (58.5 U/L vs 36;  $p < 0.001$ ), CRP (162 mg/L vs 79;  $p < 0.001$ ), ferritin (798 ng/L vs 509 ng/L;  $p < 0.001$ ), LDH (517 U/L vs 347 U/L;  $p < 0.001$ ), and procalcitonin (0.44 ng/mL vs 0.09 ng/mL;  $p < 0.001$ ) as compared to those who were discharged (**Table 2**). We also observed a significant elevation in D-Dimer (56%  $> 2.0$  ug/mL vs 21 %  $> 2.0$  ug/mL;  $p < 0.001$ ) in those who died as compared to those who were discharged.

### Patients Requiring ICU Admission

Of the 1,078 patients who completed their hospital course, 385 (36%) required intensive care during their hospital stay. For these patients, vital signs and laboratory values immediately before transfer to intensive care are displayed in **Table 3**, stratified by mortality outcome. Immediately before their ICU admission, patients who died were more likely to be tachycardiac (38% vs 19%;  $p < 0.001$ ) and hypotensive (22% vs 4%;  $p < 0.001$ ) as compared to those who were ultimately discharged. We also observed that patients who died had a lower median lymphocyte percentage (9.6% vs 16.6%) and greater serum creatinine (1.5 mg/dL vs 0.6 mg/dL;  $p < 0.001$ ), AST (62 U/L vs 35;  $p < 0.001$ ), CRP (220 mg/L vs 76 mg/L;  $p < 0.001$ ), ferritin (920 ng/L vs 503;  $p < 0.001$ ), procalcitonin greater than 0.49 mg/mL (59% vs 10%;  $p < 0.001$ ), LDH (513 U/L vs 333 U/L;  $p < 0.001$ ), CK (659 U/L vs 146;  $p < 0.001$ ) and D-dimer greater than 2 ug/mL (63% vs 22%;  $p < 0.001$ ) as compared to those who were discharged (**Table 3**).

## DISCUSSION

The COVID-19 pandemic represents the greatest public health emergency in the modern world. Limited data, especially in the US, exists to guide clinical care, resource management, and risk stratification in hospitalized patients. Our study is of the case series of patients reported with confirmed COVID-19 in the US. Previous reports were either from other countries, examined smaller cohorts, or were focused on critically ill patients<sup>4,8-13</sup>. The present report provides a broad perspective on patients admitted with COVID-19 in both general medicine ward and intensive care settings. Our study presents key clinical differences from laboratory data available at time of admission and thus would aid clinical management decision-making early in the hospital course. Additionally, our health system serves a unique population representative of the ethnic and socioeconomic diversity seen in both New York City and across the United States.

We highlight several key findings. Among the 1,078 patients who completed their hospital course (discharge or in-hospital death), the overall mortality rate was 29% and 31% in patients who received ICU care. The overall case fatality rate likely represents an overestimation of the true disease mortality rate since patients who remained

1  
2  
3 hospitalized at the date of data freeze were not included in this calculation. The  
4 mortality rate in intensive care is lower than previously described<sup>4,13–15</sup> and may be  
5 reflective of early care escalation.  
6

7  
8 We observed that patients who died had a significantly higher median age with  
9 significantly more pre-existing conditions than those who were discharged. Though 25%  
10 of patients were febrile on admission, this may be an underestimation due to possible  
11 antipyretic use and/or selection bias. A substantial proportion of patients with COVID-19  
12 displayed abnormal laboratory measurements at the time of admission. These included  
13 lymphopenia and elevated inflammatory markers such as D-dimer, CRP, LDH, and  
14 ferritin. These trends persisted among those who died and/or received intensive care,  
15 both on admission and at the time of ICU transfer. If formal epidemiologic analyses  
16 confirm these observations, early laboratory evaluation may be crucial in identifying  
17 patients suspected for COVID-19 prior to RT-PCR test result. It may also aid clinicians  
18 in identifying patients at high risk of decompensation, ICU admission, and potentially  
19 even death. Early identification of high-risk patients could enable timely patient triage  
20 and improved resource allocation. Additional work is needed to develop real-time,  
21 accurate predictive models for risk stratification in COVID-19, particularly to elucidate  
22 the clinical utility of specific laboratory measurements.  
23  
24  
25

26  
27 Han et al. found a significant association of serum lactate dehydrogenase and c-  
28 reactive protein with COVID-19 severity in patients from China<sup>16</sup>. As the number of  
29 cases rose quickly in New York City, MSHS hospitals served as early adopters, creating  
30 a COVID-19 order set in our EHR to streamline objective data gathering, facilitate more  
31 cohesive workflow amongst team members, and minimize ancillary staff exposure by  
32 completing all necessary admission labs at one time. This laboratory order set included  
33 serum D-dimer, C-reactive protein, procalcitonin, ferritin, and lactate dehydrogenase. In  
34 turn, we observed an increase in these orders from the first day of admission over the  
35 study period (**Supplementary Figure 2**). Given the abnormalities observed in patients  
36 who died, these laboratory measurements may be prognostic markers of disease  
37 severity or subsequent clinical course, although this requires further investigation. If  
38 confirmed, other health systems expecting impending case surges may consider similar  
39 workflows to promote improved healthcare delivery to affected patients.  
40  
41

42  
43 Our study should be considered in light of several limitations. Since COVID-19 testing is  
44 frequently repeated in hospitalized patients and initial testing may result in false  
45 negatives, we are unable to determine whether patients developed their infection during  
46 or before hospital admission. Furthermore, COVID-19 has a variable incubation period  
47 of approximately 8-15 days<sup>17</sup>, and patients may present to the hospital several days  
48 after initial infection or the onset of symptoms. Thus, we are unable to determine  
49 patients' disease duration. Additionally, we separated discharged patients from those  
50 who died, but some patients may have expired after discharge. This could affect our  
51 listed case mortality rate. Our study is also confined by the inherent limitations (e.g.  
52 biases) of EHR data. Although utilizing structured EHR data allows for rapid integration  
53 of multiple data streams and real-time analysis, data present only in clinical note text,  
54 such as symptoms on presentation are missed. We chose not to perform  
55  
56  
57  
58  
59  
60

1  
2  
3 comprehensive manual chart review to prioritize timely dissemination of our  
4 observations.  
5

6  
7 As the COVID-19 pandemic spreads from the current epicenter in New York City to  
8 other areas, our report provides meaningful clinical insights that may better inform care  
9 for diverse populations. Future work will aim to predict COVID-19 patient outcomes  
10 using a variety of approaches, thereby reducing healthcare system burden and  
11 permitting improved care delivery.  
12  
13

## 14 **Figures**

15  
16  
17 **Figure 1:** Hospital Admissions of COVID-19 patients within our cohort.

18 Panel A: The number of total patients (n = 2,199) admitted each day to one of the  
19 hospitals for the duration of the study period. Panel B: The number of patients  
20 cumulatively admitted, cumulatively discharged, or still hospitalized by day.  
21  
22

23  
24 **Figure 2:** Cumulative incidence function displays the probability of mutually exclusive  
25 events of discharge (blue) or death (red) by a given day of hospitalization, accounting  
26 for the changing number of patients at risk including censoring. The remaining portion  
27 (white) shows patients that are still hospitalized, where the median length of stay is 7.7  
28 days.  
29  
30

**Table 1.** Characteristics of Hospitalized COVID-19 Patients at Baseline (n=2,199)

| Characteristics of Admission                             |             | N with characteristic available |
|----------------------------------------------------------|-------------|---------------------------------|
| <b>Admission Source, n (%)</b>                           |             |                                 |
| Emergency Department                                     | 1558 (71)   | 2199                            |
| Other                                                    | 641 (29)    |                                 |
| <b>Race, n (%)</b>                                       |             |                                 |
| White                                                    | 554 (25.2)  | 2199                            |
| Black or African American                                | 543 (24.7)  |                                 |
| Asian                                                    | 74 (3.4)    |                                 |
| Pacific Islander                                         | 25 (1.1)    |                                 |
| Other                                                    | 912 (41.5)  |                                 |
| Unknown                                                  | 91 (4.1)    |                                 |
| <b>Ethnicity, n (%)</b>                                  |             |                                 |
| Hispanic/Latino                                          | 576 (26.2)  | 2199                            |
| Non-Hispanic/Latino                                      | 1305 (59.4) |                                 |
| Unknown                                                  | 318 (14.5)  |                                 |
| <b>Age, Median (IQR)</b>                                 | 65 (54-76)  | 2199                            |
| <b>Age Groups, n (%)</b>                                 |             |                                 |
| 18-30                                                    | 73 (3.3)    | 2199                            |
| 31-40                                                    | 179 (8.1)   |                                 |
| 41-50                                                    | 225 (10.2)  |                                 |
| 51-60                                                    | 395 (18.0)  |                                 |
| 61-70                                                    | 527 (24.0)  |                                 |
| 71-80                                                    | 444(20.2)   |                                 |
| 81-90                                                    | 274 (12.5)  |                                 |
| 91 or older                                              | 82 (3.7)    |                                 |
| <b>Sex, n (%)</b>                                        |             |                                 |
| Male                                                     | 1293 (58.8) | 2199                            |
| Female                                                   | 906 (41.2)  |                                 |
| <b>Body Mass Index in kg/m<sup>2</sup>, Median (IQR)</b> | 28 (6)      | 1316                            |
| <b>Previous Medical History, n (%)</b>                   |             |                                 |
| Atrial Fibrillation                                      | 156 (7.1)   | 2199                            |
| Asthma                                                   | 180 (8.2)   |                                 |
| Coronary Artery Disease                                  | 343 (15.6)  |                                 |
| Cancer                                                   | 151 (6.9)   |                                 |
| Chronic Kidney Disease                                   | 207 (9.4)   |                                 |
| Chronic Obstructive Pulmonary Disease                    | 113 (5.1)   |                                 |
| Diabetes Mellitus                                        | 583 (26.5)  |                                 |

|                                                           |                  |      |
|-----------------------------------------------------------|------------------|------|
| Heart Failure                                             | 217 (9.9)        |      |
| Hypertension                                              | 812 (37)         |      |
| Stroke                                                    | 153 (7)          |      |
| <b>Vital Signs at Hospital Admission</b>                  |                  |      |
| Heart Rate in beats per min, Median (IQR)                 | 95 (83-108)      | 2181 |
| Number of patients >100 Beats per min, n(%)               | 857 (39)         |      |
| Temperature in degree Fahrenheit                          | 99 (2)           | 2180 |
| Number of patients >100.4-degree Fahrenheit, n (%)        | 535 (25)         |      |
| Respiratory Rate in breaths/minute                        | 20 (3)           |      |
| Systolic Blood Pressure in mmHg, Median (IQR)             | 130 (29)         | 2176 |
| Diastolic Blood Pressure in mmHg, Median (IQR)            | 74 (17)          |      |
| <b>Admission Laboratory Parameters, Median (IQR)</b>      |                  |      |
| White Blood Cell Count -K/uL, Median (IQR)                | 7 (5.2-9.9)      | 2029 |
| Number of patients >10, n (%)                             | 498 (25)         | 2029 |
| Number of patients <4, n (%)                              | 224 (11)         | 2029 |
| Lymphocyte Count - K/uL, Median (IQR)                     | 0.9 (0.7-1.3)    | 1888 |
| Lymphocyte Percentage, Median (IQR)                       | 13.8(8.5-20.5)   | 1972 |
| Hemoglobin - g/dL, Median (IQR)                           | 13.1(11.6-14.4)  | 2031 |
| Platelet Count - K/uL, Median (IQR)                       | 195(151-253)     | 2028 |
| Prothrombin Time - sec, Median (IQR)                      | 13.9(13.2-15)    | 937  |
| Activated Partial Thromboplastin Time - sec, Median (IQR) | 32 (29-36.1)     | 926  |
| Serum Sodium - mEq/L, Median (IQR)                        | 137 (134-140)    | 2015 |
| Serum Potassium - mEq/L, Median (IQR)                     | 4.2 (3.9-4.6)    | 2006 |
| Serum Creatinine - mg/dL, Median (IQR)                    | 1 (0.8-1.5)      | 2018 |
| Aspartate aminotransferase - U/L, Median (IQR)            | 42 (30-70.5)     | 1815 |
| Alanine aminotransferase - U/L, Median (IQR)              | 32 (19-56)       | 1025 |
| Serum Albumin - g/dL, Median (IQR)                        | 3.2 (2.8-3.6)    | 1848 |
| Venous lactate - mmol/L, Median (IQR)                     | 1.5 (1.1-2)      | 775  |
| Number of patients >1.5, n (%)                            | 392 (51)         | 775  |
| <b>Inflammatory Markers</b>                               |                  |      |
| C-Reactive Protein - mg/L, Median (IQR)                   | 110 (57.8-196)   | 1354 |
| Ferritin -ng/L, Median (IQR)                              | 714 (324-1730)   | 1324 |
| Procalcitonin -ng/mL, Median (IQR)                        | 0.18 (0.08-0.57) | 1241 |



|   |                                          |                  |      |
|---|------------------------------------------|------------------|------|
| 1 | Number of patients >0.49, n (%)          | 344 (28)         | 1241 |
| 2 | Number of patients <0.15, n (%)          | 573 (46)         | 1241 |
| 3 | Lactate Dehydrogenase -U/L, Median (IQR) | 416 (314-545)    | 1290 |
| 4 | Creatinine Kinase - U/L, Median (IQR)    | 199 (97-565)     | 502  |
| 5 | D-Dimer -ug/mL, Median (IQR)             | 1.31 (0.74-2.44) | 1079 |
| 6 | Number of patients >2.0, n (%)           | 352 (33)         | 1079 |

Baseline values are defined as first values on hospitalization. All continuous characteristics are in Median (Interquartile Range) unless specified otherwise and all categorical characteristics are in number (percentage). The percentage is calculated with the number of patients who had the characteristic available as the denominator. For further clarity, the number in which that characteristic was available for is provided separately in adjacent column.

**Table 2.** Characteristics of Hospitalized COVID-19 patients by patients who had in-hospital mortality vs. those who were discharged alive (N=1,078). Continuous and categorical variables were compared using a Wilcoxon test and Fisher exact test, respectively.

|                                                          | Patients with In-Hospital Mortality (n=310) | N with characteristic available | Patients who were discharged alive (n=768) | N with characteristic available | P value |
|----------------------------------------------------------|---------------------------------------------|---------------------------------|--------------------------------------------|---------------------------------|---------|
| Time to ICU (hours), Median (IQR)                        | 11.0 (4.9 - 44.7)                           | 121                             | 12.6 (3.1 - 11.1)                          | 264                             | <0.001  |
| <b>Race, n (%)</b>                                       |                                             |                                 |                                            |                                 |         |
| White                                                    | 98 (31.6)                                   | 310                             | 216 (28.1)                                 | 768                             | <0.001  |
| Black or African American                                | 71 (22.9)                                   |                                 | 185 (24.1)                                 |                                 |         |
| Asian                                                    | 17 (5.5)                                    |                                 | 22 (2.9)                                   |                                 |         |
| Pacific Islander                                         | 1 (0.3)                                     |                                 | 7 (0.9)                                    |                                 |         |
| Other                                                    | 111 (35.8)                                  |                                 | 310 (40.4)                                 |                                 |         |
| Unknown                                                  | 12 (3.9)                                    |                                 | 28 (3.6)                                   |                                 |         |
| <b>Ethnicity, n (%)</b>                                  |                                             |                                 |                                            |                                 |         |
| Hispanic/Latino                                          | 58 (18.7)                                   | 310                             | 208 (27.1)                                 | 768                             | 0.005   |
| Non-Hispanic/Latino                                      | 198 (63.9)                                  |                                 | 464 (60.4)                                 |                                 |         |
| Unknown                                                  | 54 (17.4)                                   |                                 | 96 (12.5)                                  |                                 |         |
| <b>Age, Median (IQR)</b>                                 | 75 (64-85)                                  |                                 | 59 (45-72)                                 |                                 | <0.001  |
| <b>Age Groups, n (%)</b>                                 |                                             |                                 |                                            |                                 |         |
| 18-30                                                    | 1 (0.32)                                    | 310                             | 53 (6.9)                                   | 768                             |         |
| 31-40                                                    | 2 (0.65)                                    |                                 | 108 (14.1)                                 |                                 |         |
| 41-50                                                    | 17 (5.5)                                    |                                 | 100 (13.0)                                 |                                 |         |
| 51-60                                                    | 37 (11.9)                                   |                                 | 143 (18.6)                                 |                                 |         |
| 61-70                                                    | 66 (21.3)                                   |                                 | 157 (20.4)                                 |                                 |         |
| 71-80                                                    | 83 (26.8)                                   |                                 | 130 (16.9)                                 |                                 |         |
| 80-90                                                    | 75 (24.2)                                   |                                 | 62 (8.1)                                   |                                 |         |
| >90                                                      | 29 (9.4)                                    |                                 | 15 (2.0)                                   |                                 |         |
| <b>Sex, n (%)</b>                                        |                                             |                                 |                                            |                                 |         |
| Male                                                     | 191 (61.6)                                  | 310                             | 436 (56.8)                                 | 768                             | 0.16    |
| Female                                                   | 119 (38.4)                                  |                                 | 332 (43.2)                                 |                                 |         |
| <b>Body Mass Index in kg/m<sup>2</sup>, Median (IQR)</b> | 32 (7)                                      | 241                             | 28 (6)                                     | 627                             | <0.001  |
| <b>Previous Medical History, n (%)</b>                   |                                             |                                 |                                            |                                 |         |
| Atrial Fibrillation                                      | 43 (13.9)                                   | 768                             | 42 (5.5)                                   | 768                             | 0.91    |

|    |                                                           |                  |     |                  |     |        |
|----|-----------------------------------------------------------|------------------|-----|------------------|-----|--------|
| 1  | Asthma                                                    | 23 (7.4)         |     | 61 (7.9)         |     | 0.87   |
| 2  | Coronary Artery Disease                                   | 83 (26.8)        |     | 84 (10.9)        |     | <0.001 |
| 3  | Cancer                                                    | 24 (7.7)         |     | 40 (5.2)         |     | 0.147  |
| 4  | Chronic Kidney Disease                                    | 41 (13.2)        |     | 54 (7)           |     | 0.002  |
| 5  | Chronic Obstructive Pulmonary Disease                     | 28 (9)           |     | 31 (4)           |     | 0.002  |
| 6  | Diabetes Mellitus                                         | 105 (33.9)       |     | 151 (19.7)       |     | <0.001 |
| 7  | Heart Failure                                             | 64 (20.6)        |     | 53 (6.9)         |     | <0.001 |
| 8  | Hypertension                                              | 140 (45.2)       |     | 233 (30.3)       |     | <0.001 |
| 9  | Stroke                                                    | 32 (10.3)        |     | 40 (5.2)         |     | 0.004  |
| 10 | <b>Admission Laboratory Parameters</b>                    |                  |     |                  |     |        |
| 11 | White Blood Cell Count -K/uL, Median (IQR)                | 8.6 (5.9-12)     | 281 | 6.2 (4.7-8.2)    | 728 | <0.001 |
| 12 | Number of patients >10, n (%)                             | 105(37)          | 281 | 101(14)          | 728 | <0.001 |
| 13 | Number of patients <4, n (%)                              | 17 (6)           | 281 | 106 (15)         | 728 | <0.001 |
| 14 | Hemoglobin - g/dL, Median (IQR)                           | 12.6 (10.9-14.3) | 282 | 13.2 (11.9-14.4) | 728 | <0.001 |
| 15 | Platelet Count - K/uL, Median (IQR)                       | 185 (144-239)    | 282 | 193 (153-247)    | 726 | 0.070  |
| 16 | Lymphocyte Count - K/uL, Median (IQR)                     | 0.9 (0.6-1.3)    | 248 | 1 (0.8-1.4)      | 689 | <0.001 |
| 17 | Lymphocyte Percentage, Median (IQR)                       | 11.7 (6.6-18.6)  | 270 | 16.6 (11.7-24.2) | 710 | <0.001 |
| 18 | Prothrombin Time - sec, Median (IQR)                      | 14.2 (13.6-16.3) | 142 | 13.5 (13-14.4)   | 304 | <0.001 |
| 19 | Activated Partial Thromboplastin Time - sec, Median (IQR) | 32.9 (30.2-37.6) | 140 | 31.4 (28.7-34.8) | 302 | 0.001  |
| 20 | Serum Sodium - mEq/L, Median (IQR)                        | 138 (134-141)    | 284 | 137 (135-140)    | 708 | 0.059  |

|                                                |                  |     |                  |     |        |
|------------------------------------------------|------------------|-----|------------------|-----|--------|
| Serum Potassium - mEq/L, Median (IQR)          | 4.4 (4-5)        | 288 | 4.1 (3.8-4.5)    | 706 | <0.001 |
| Serum Creatinine - mg/dL, Median (IQR)         | 1.3 (0.9-2.2)    | 288 | 0.9(0.7-1.2)     | 710 | <0.001 |
| Aspartate aminotransferase - U/L, Median (IQR) | 58.5 (34-102)    | 246 | 36 (26-54)       | 628 | <0.001 |
| Alanine aminotransferase - U/L, Median (IQR)   | 32 (19-58)       | 119 | 30 (19-52)       | 358 | 0.47   |
| Serum Albumin - g/dL, Median (IQR)             | 3 (2.7-3.4)      | 255 | 3.4 (3-3.7)      | 635 | <0.001 |
| Venous lactate - mmol/L, Median (IQR)          | 1.8 (1.3-2.6)    | 108 | 1.3 (1.1-1.8)    | 236 | <0.001 |
| Number of patients >1.5 mmol/L, n (%)          | 74 (69)          | 108 | 88 (37)          | 236 | <0.001 |
| <b>Inflammatory Markers</b>                    |                  |     |                  |     |        |
| C-Reactive Protein - mg/L, Median (IQR)        | 162 (75.7-266)   | 141 | 79.3 (37.5-144)  | 422 | <0.001 |
| Ferritin -ng/L, Median (IQR)                   | 798 (397-2020)   | 146 | 509 (235-987)    | 410 | <0.001 |
| Procalcitonin - ng/mL, Median (IQR)            | 0.44 (0.16-1.45) | 138 | 0.09 (0.05-0.22) | 392 | <0.001 |
| Number of patients >0.49, n (%)                | 67 (49)          | 138 | 46 (12)          | 392 | <0.001 |
| Number of patients <0.15, n (%)                | 34 (25)          | 138 | 263 (67)         | 392 | <0.001 |
| Lactate Dehydrogenase - U/L, Median (IQR)      | 517(371-756)     | 134 | 347 (272-448)    | 419 | <0.001 |
| Creatinine Kinase - U/L, Median (IQR)          | 472 (139-940)    | 74  | 154 (84-319)     | 126 | <0.001 |
| D-Dimer - ug/mL, Median (IQR)                  | 2.41 (1.18-3.79) | 117 | 0.93 (0.58-1.61) | 282 | <0.001 |

|   |                  |        |     |         |     |        |
|---|------------------|--------|-----|---------|-----|--------|
| 1 | Number of        |        |     |         |     |        |
| 2 | patients >2.0, n | 66(56) | 117 | 59 (21) | 282 | <0.001 |
| 3 | (%)              |        |     |         |     |        |

4  
5  
6 Baseline values are defined as first values on hospitalization. All continuous characteristics are  
7 in Median (Interquartile Range) unless specified otherwise and all categorical characteristics are in  
8 number (percentage). The percentage is calculated with the number of patients who had the  
9 characteristic available as the denominator. For further clarity, the number in which that characteristic  
10 was available for is provided separately in adjacent column.  
11  
12  
13  
14  
15  
16  
17  
18  
19  
20  
21  
22  
23  
24  
25  
26  
27  
28  
29  
30  
31  
32  
33  
34  
35  
36  
37  
38  
39  
40  
41  
42  
43  
44  
45  
46  
47  
48  
49  
50  
51  
52  
53  
54  
55  
56  
57  
58  
59  
60

**Table 3.** Selected characteristics for hospitalized COVID-19 patients before transfer to Intensive care stratified by in-hospital mortality (N= 385). Continuous and categorical variables were compared using a Wilcoxon test and Fisher exact test, respectively.

|                                                              | <b>Patients with In-Hospital Mortality who Required Intensive Care (n=121)</b> | <b>N with characteristic available</b> | <b>Patients who were discharged alive but Required Intensive Care (n=264)</b> | <b>N with characteristic available</b> |        |
|--------------------------------------------------------------|--------------------------------------------------------------------------------|----------------------------------------|-------------------------------------------------------------------------------|----------------------------------------|--------|
| <b>Vital Signs, n (%)</b>                                    |                                                                                |                                        |                                                                               |                                        |        |
| Number of patients with heart rate >100 Beats per min, n (%) | 45 (38)                                                                        | 118                                    | 51 (19)                                                                       | 264                                    | <0.001 |
| Number of patients with temperature >100.4F, n (%)           | 21 (18)                                                                        |                                        | 54 (20)                                                                       |                                        | 0.294  |
| Systolic Blood Pressure < 100 mm of Hg                       | 27 (22)                                                                        |                                        | 10 (4)                                                                        |                                        | <0.001 |
| <b>Admission Laboratory Parameters, Median (IQR)</b>         |                                                                                |                                        |                                                                               |                                        |        |
| White Blood Cell Count -K/uL, Median (IQR)                   | 10.1 (6.3-14.7)                                                                | 111                                    | 5.6 (4.3-7.7)                                                                 | 258                                    | <0.001 |
| Number of patients >10-K/uL, n (%)                           | 58 (52)                                                                        | 111                                    | 28 (11)                                                                       | 258                                    | <0.001 |
| Number of patients <4, n (%)                                 | 6 (5)                                                                          | 111                                    | 54 (21)                                                                       | 258                                    | <0.001 |
| Hemoglobin - g/dL, Median (IQR)                              | 12.1 (10.4-13.8)                                                               | 111                                    | 13 (11.5-14.2)                                                                | 258                                    | <0.001 |
| Platelet Count - K/uL, Median (IQR)                          | 185 (146-230)                                                                  | 111                                    | 191(153-248)                                                                  | 258                                    | 0.308  |
| Lymphocyte Count - K/uL, Median (IQR)                        | 0.8 (0.6-1.25)                                                                 | 91                                     | 1 (0.75-1.4)                                                                  | 239                                    | 0.003  |
| Lymphocyte Percentage, Median (IQR)                          | 9.6 (5.5-17.2)                                                                 | 103                                    | 16.6 (12-26.4)                                                                | 251                                    | <0.001 |
| Prothrombin Time - sec, Median (IQR)                         | 14.9 (13.8-16.7)                                                               | 63                                     | 13.7(13.2-14.7)                                                               | 97                                     | <0.001 |

|    |                             |                |     |                |     |        |
|----|-----------------------------|----------------|-----|----------------|-----|--------|
| 1  | Activated Partial           |                |     |                |     |        |
| 2  | Thromboplastin Time         | 34 (30.6-38.2) | 62  | 31.4 (29.4-35) | 96  | 0.027  |
| 3  | - sec, Median (IQR)         |                |     |                |     |        |
| 4  | Serum Sodium -              |                |     |                |     |        |
| 5  | mEq/L, Median (IQR)         | 137 (135-140)  | 114 | 137 (135-140)  | 237 | 0.449  |
| 6  | Serum Potassium -           |                |     |                |     |        |
| 7  | mEq/L, Median (IQR)         | 4.3 (4-4.9)    | 112 | 4.1 (3.8-4.4)  | 237 | <0.001 |
| 8  | Serum Creatinine -          |                |     |                |     |        |
| 9  | mg/dL, Median (IQR)         | 1.5 (0.94-2.4) | 114 | 0.8 (0.7-1.1)  | 261 | <0.001 |
| 10 | Aspartate                   |                |     |                |     |        |
| 11 | aminotransferase -          | 62 (36.2-105)  | 106 | 35 (26-54.5)   | 236 | <0.001 |
| 12 | U/L, Median (IQR)           |                |     |                |     |        |
| 13 | Alanine                     |                |     |                |     |        |
| 14 | aminotransferase -          | 28 (16-54)     | 56  | 28 (19-52)     | 215 | 0.514  |
| 15 | U/L, Median (IQR)           |                |     |                |     |        |
| 16 | Serum Albumin -             |                |     |                |     |        |
| 17 | g/dL, Median (IQR)          | 2.7 (2.3-3.2)  | 107 | 3.3 (2.9-3.6)  | 236 | <0.001 |
| 18 | Venous lactate -            |                |     |                |     |        |
| 19 | mmol/L, Median              | 1.55 (1.02-    | 34  | 1.3 (1.1-1.7)  | 49  | 0.157  |
| 20 | (IQR)                       | 2.15)          |     |                |     |        |
| 21 | Number of                   |                |     |                |     |        |
| 22 | patients >1.5 mmol/L,       | 19 (56)        | 34  | 20 (41)        | 49  | 0.157  |
| 23 | n (%)                       |                |     |                |     |        |
| 24 | <b>Inflammatory Markers</b> |                |     |                |     |        |
| 25 | C-Reactive Protein          |                |     |                |     |        |
| 26 | - mg/L, Median (IQR)        | 220 (113-297)  | 80  | 75.6 (36.2-    | 182 | <0.001 |
| 27 | Ferritin -ng/L,             |                |     |                |     |        |
| 28 | Median (IQR)                | 920 (470-      | 76  | 503 (266-      | 187 | <0.001 |
| 29 |                             | 2220)          |     | 1020)          |     |        |
| 30 | Procalcitonin -             |                |     |                |     |        |
| 31 | ng/mL, Median (IQR)         | 1.02 (0.20-    | 58  | 0.08 (0.05-    | 163 | <0.001 |
| 32 |                             | 4.5)           |     | 0.22)          |     |        |
| 33 | Number of                   |                |     |                |     |        |
| 34 | patients >0.49, n (%)       | 34 (59)        | 58  | 17 (10)        | 163 | <0.001 |
| 35 | Number of                   |                |     |                |     |        |
| 36 | patients <0.15, n (%)       | 11 (19)        | 58  | 106 (65)       | 163 | <0.001 |
| 37 | Lactate                     |                |     |                |     |        |
| 38 | Dehydrogenase -U/L,         | 513 (399-729)  | 67  | 333 (274-422)  | 188 | <0.001 |
| 39 | Median (IQR)                |                |     |                |     |        |

|                                                                               |                                                                                                                                                                                                                                                                            |                                          |                    |    |                |     |        |
|-------------------------------------------------------------------------------|----------------------------------------------------------------------------------------------------------------------------------------------------------------------------------------------------------------------------------------------------------------------------|------------------------------------------|--------------------|----|----------------|-----|--------|
| 1<br>2<br>3<br>4<br>5<br>6<br>7<br>8<br>9<br>10<br>11<br>12<br>13<br>14<br>15 | 16<br>17<br>18<br>19<br>20<br>21<br>22<br>23<br>24<br>25<br>26<br>27<br>28<br>29<br>30<br>31<br>32<br>33<br>34<br>35<br>36<br>37<br>38<br>39<br>40<br>41<br>42<br>43<br>44<br>45<br>46<br>47<br>48<br>49<br>50<br>51<br>52<br>53<br>54<br>55<br>56<br>57<br>58<br>59<br>60 | Creatinine Kinase -<br>U/L, Median (IQR) | 659 (305-<br>1450) | 42 | 146 (60-268)   | 73  | <0.001 |
|                                                                               |                                                                                                                                                                                                                                                                            | D-Dimer -ug/mL,<br>Median (IQR)          | 2.7 (1.6-5.8)      | 57 | 0.83 (0.5-1.6) | 127 | <0.001 |
|                                                                               |                                                                                                                                                                                                                                                                            | Number of<br>patients >2.0, n (%)        | 36 (63)            | 57 | 28 (22)        | 127 | <0.001 |

All values are closest values in twenty-four hours prior to ICU admission. All continuous characteristics are in Median (Interquartile Range) unless specified otherwise and all categorical characteristics are in number (percentage). The percentage is calculated with the number of patients who had the characteristic available as the denominator. For further clarity, the number in which that characteristic was available for is provided separately in adjacent column.



## References

1. COVID-19 Map [Internet]. 2020. Available from: <https://coronavirus.jhu.edu/map.html>
2. Guan W, Ni Z, Hu Y, et al. Clinical Characteristics of Coronavirus Disease 2019 in China. *N Engl J Med* 2020;
3. Grasselli G, Zangrillo A, Zanella A, et al. Baseline Characteristics and Outcomes of 1591 Patients Infected With SARS-CoV-2 Admitted to ICUs of the Lombardy Region, Italy. *JAMA* [Internet] 2020; Available from: <https://doi.org/10.1001/jama.2020.5394>
4. Yang X, Yu Y, Xu J, et al. Clinical course and outcomes of critically ill patients with SARS-CoV-2 pneumonia in Wuhan, China: a single-centered, retrospective, observational study. *Lancet Respir Med* 2020;
5. States Reporting Cases of COVID-19 to CDC [Internet]. 2020. Available from: <https://www.cdc.gov/coronavirus/2019-ncov/cases-updates/cases-in-us.html>
6. Lipsitch M, Swerdlow DL, Finelli L. Defining the Epidemiology of Covid-19 - Studies Needed. *N Engl J Med* 2020;
7. R Core Team. R Core Team (2017). R: A language and environment for statistical computing. R Found Stat Comput Vienna, Austria URL <http://wwwR-project.org/> 2017; R Foundation for Statistical Computing.
8. McMichael TM, Currie DW, Clark S, et al. Epidemiology of Covid-19 in a Long-Term Care Facility in King County, Washington. *N Engl J Med* 2020;
9. Ng O-T, Marimuthu K, Chia P-Y, et al. SARS-CoV-2 Infection among Travelers Returning from Wuhan, China. *N Engl J Med* 2020;
10. Holshue ML, DeBolt C, Lindquist S, et al. First case of 2019 novel coronavirus in the United States. *N Engl J Med* 2020;
11. Verity R, Okell LC, Dorigatti I, et al. Estimates of the severity of coronavirus disease 2019 : a model-based analysis. *Lancet Infect Dis* 2020;
12. Zhou F, Yu T, Du R, et al. Clinical course and risk factors for mortality of adult inpatients with COVID-19 in Wuhan, China: a retrospective cohort study. *Lancet* 2020;
13. Bhatraju PK, Ghassemieh BJ, Nichols M, et al. Covid-19 in Critically Ill Patients in the Seattle Region - Case Series. *N Engl J Med* 2020;
14. CDC C. The Novel Coronavirus Pneumonia Emergency Response Epidemiology Team. The epidemiological characteristics of an outbreak of 2019 novel coronavirus disease (COVID-19). 2020.
15. Arentz M, Yim E, Klaff L, et al. Characteristics and Outcomes of 21 Critically Ill Patients with COVID-19 in Washington State. *JAMA - J. Am. Med. Assoc.* 2020;
16. Han Y, Zhang H, Mu S, et al. Lactate dehydrogenase, a Risk Factor of Severe COVID-19 Patients. *medRxiv* [Internet] 2020;2020.03.24.20040162. Available from: <http://medrxiv.org/content/early/2020/03/27/2020.03.24.20040162.abstract>

17. Lauer SA, Grantz KH, Bi Q, et al. The Incubation Period of Coronavirus Disease 2019 (COVID-19) From Publicly Reported Confirmed Cases: Estimation and Application. *Ann Intern Med* 2020;

### Author Contributions:

I.P., A.J.R., J.F.D., A.L., A.V., K.W.J, S.S., A.K., R.O., S.M., U.N., S.J., A.K., P.T., J.J., A.F. developed and performed the analysis. P.G., M.A.L., J.F., J.A.A., E.B., C.R.H., B.M. critically appraised the manuscript and helped acquire data. I.P., A.L., A.J.R., J.F.D., R.M., M.D., E.G., D.M., P.F.O., L.M.H., R.F., P.K., V.F., E.P.B., J.N., E.J.N. C.C., D.S.C., D.L.R., supervised the project I.P., A.L., A.J.R., J.F.D., G.N.N, B.S.G, A.W.C, A.C.J drafted the manuscript

For peer review only

### Patients Admitted per Day

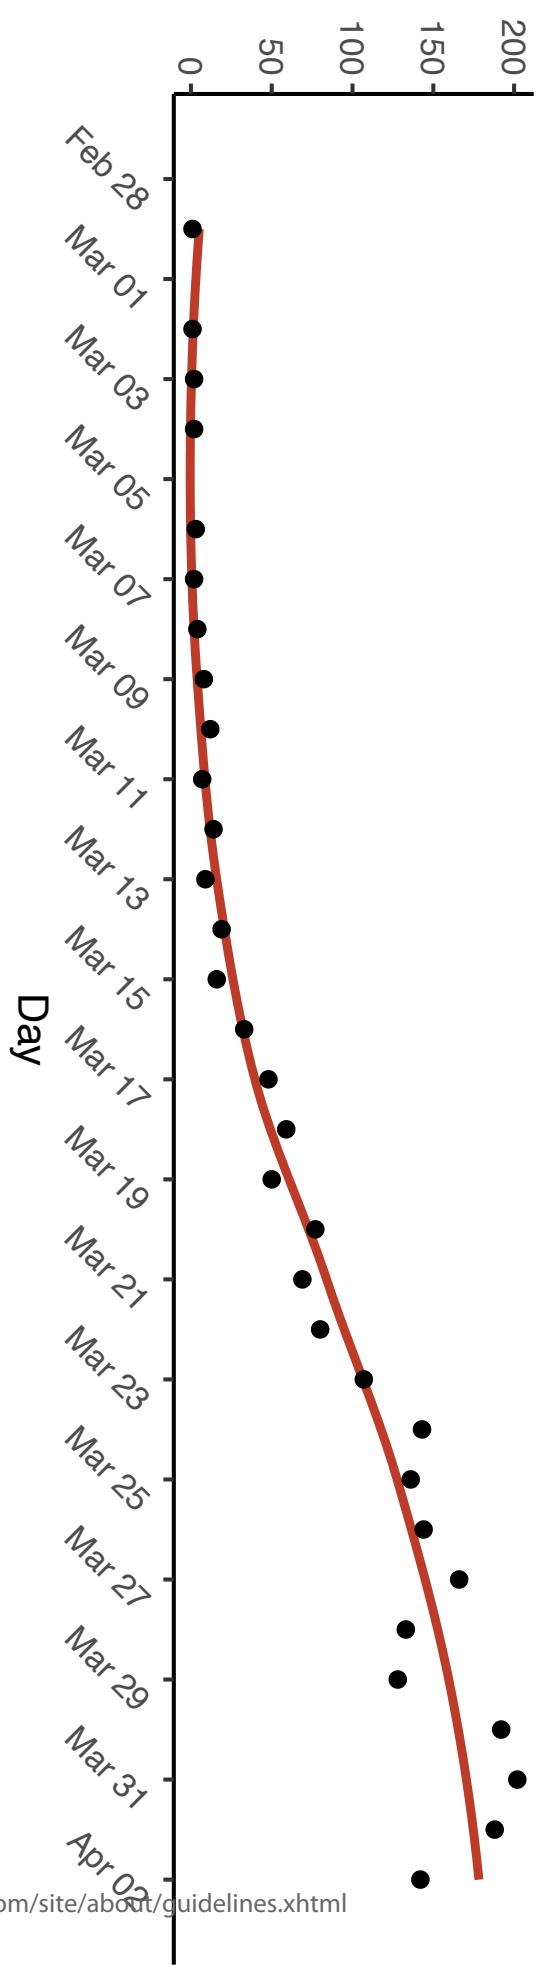

### Admitted, Discharged, and Hospitalized Patients

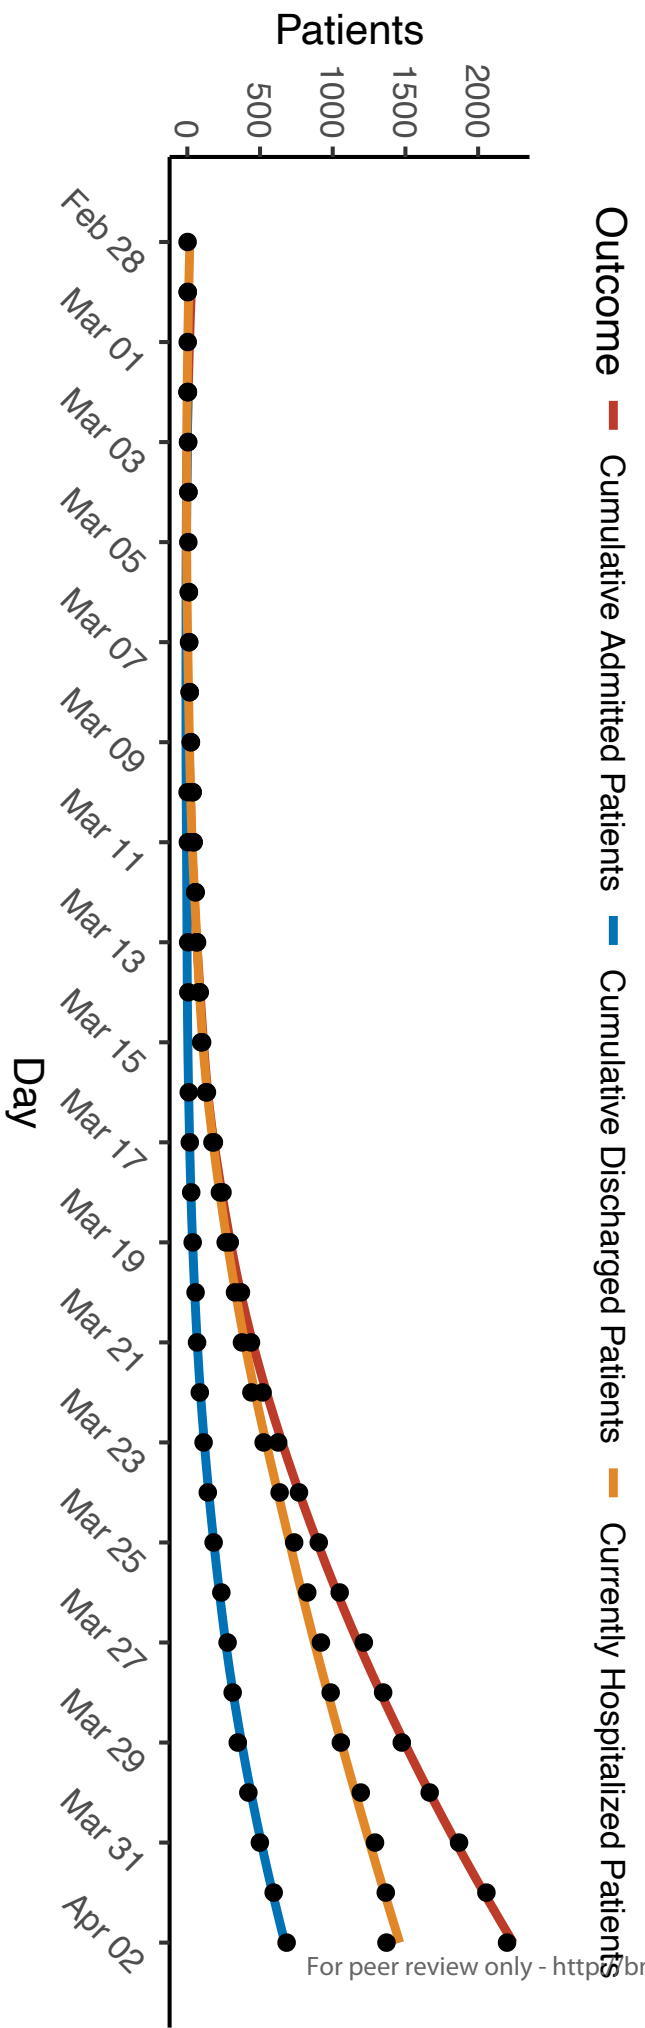

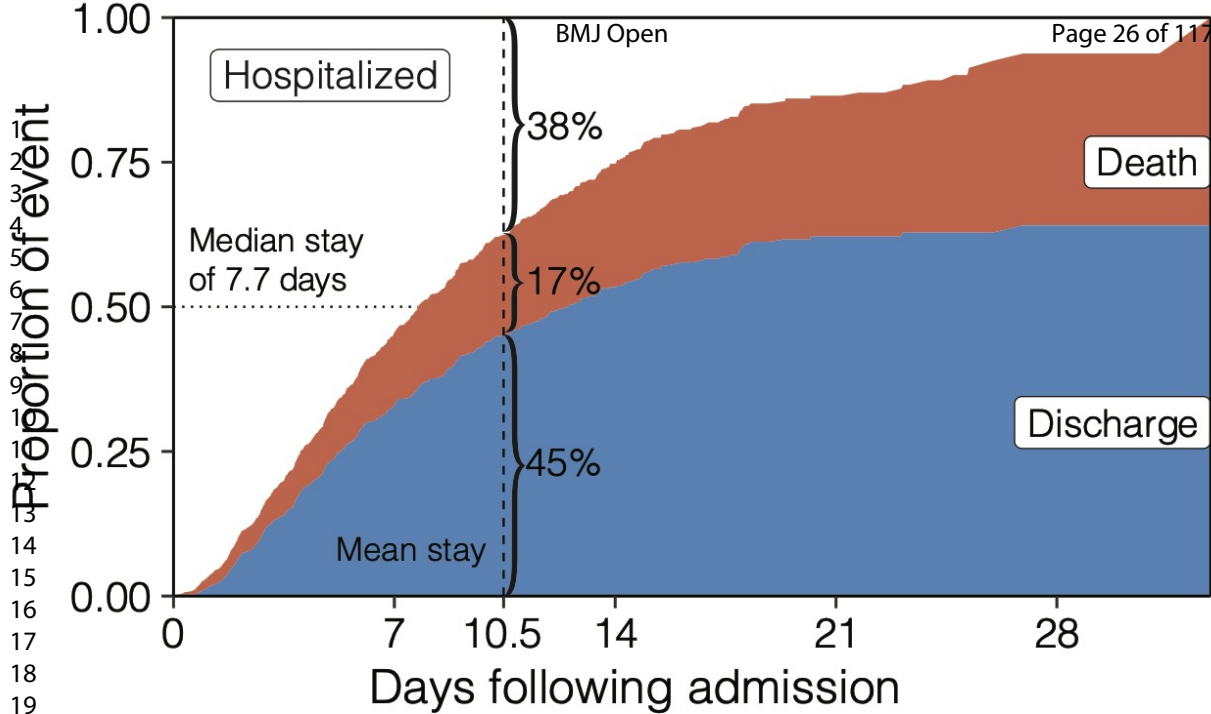

2199 For peer review only - <http://bmjopen.bmj.com/site/about/guidelines.xhtml> 4

675 120 27

Number at risk

## Supplementary Material

### Supplementary Methods

#### Mount Sinai Covid Informatics Center (MSCIC) Data Platform

This dataset of clinical data is the first part of a larger effort that aims to create an heterogeneous collection of COVID-19 patient data. This effort brings together different stakeholders from MSHS, including research faculty, data scientists, clinicians, and hospital administrators, among others. The resulting dataset includes or will include longitudinal electronic health record (EHR) patient clinical data, multi-omics, such as genomics, imaging, such as chest CT scans, among others. The data, which are updated on a daily basis, is made available within a secure computational framework based on internal Microsoft Azure Cloud to researchers and analysts within the MSHS and the Icahn School of Medicine at Mount Sinai. This dataset is intended to foster research projects to improve the knowledge of this disease and augment clinical operations with machine intelligence.

#### Supplementary Figures

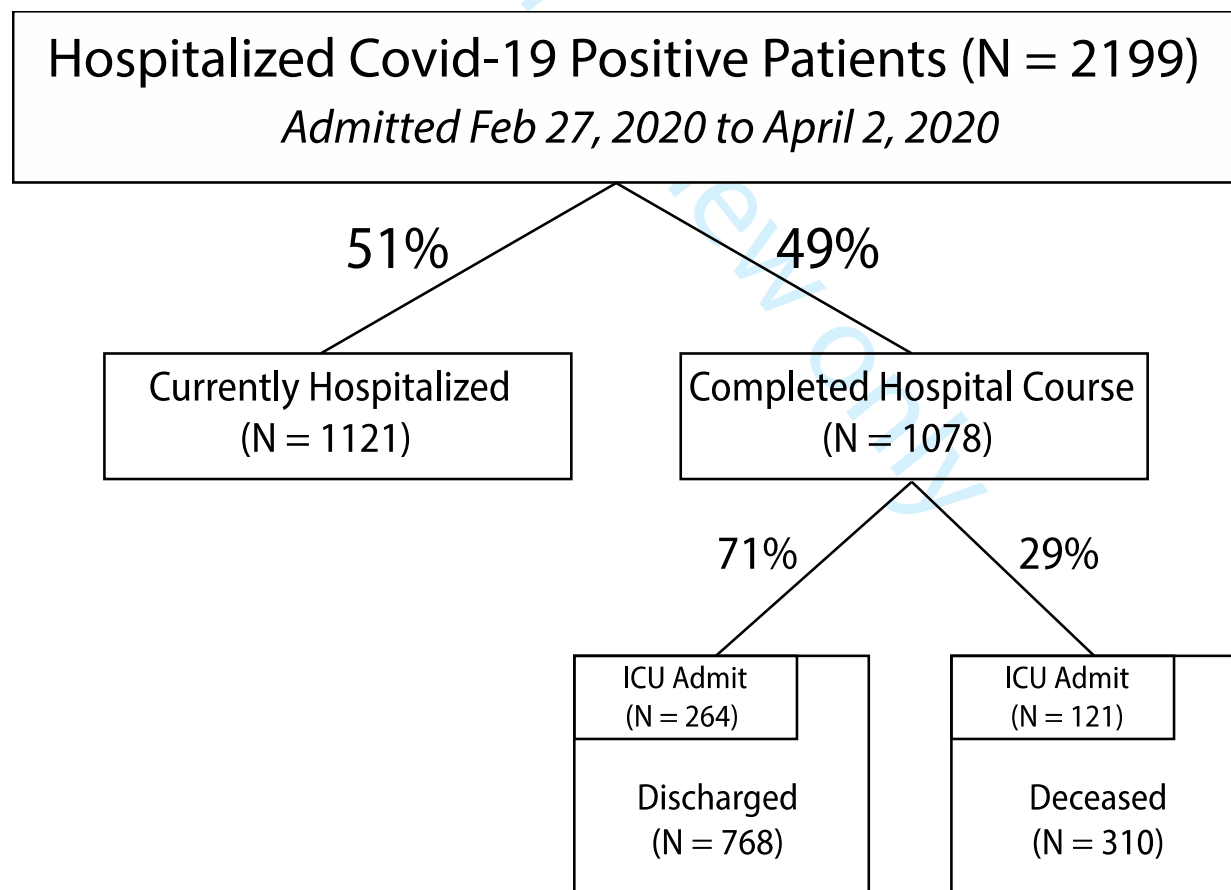

**Supplementary Figure 1:** Flowchart of patients included in study cohort. All patients had a confirmed COVID-19 qPCR from a nasopharyngeal swab. Patients were stratified by completion of hospital course.

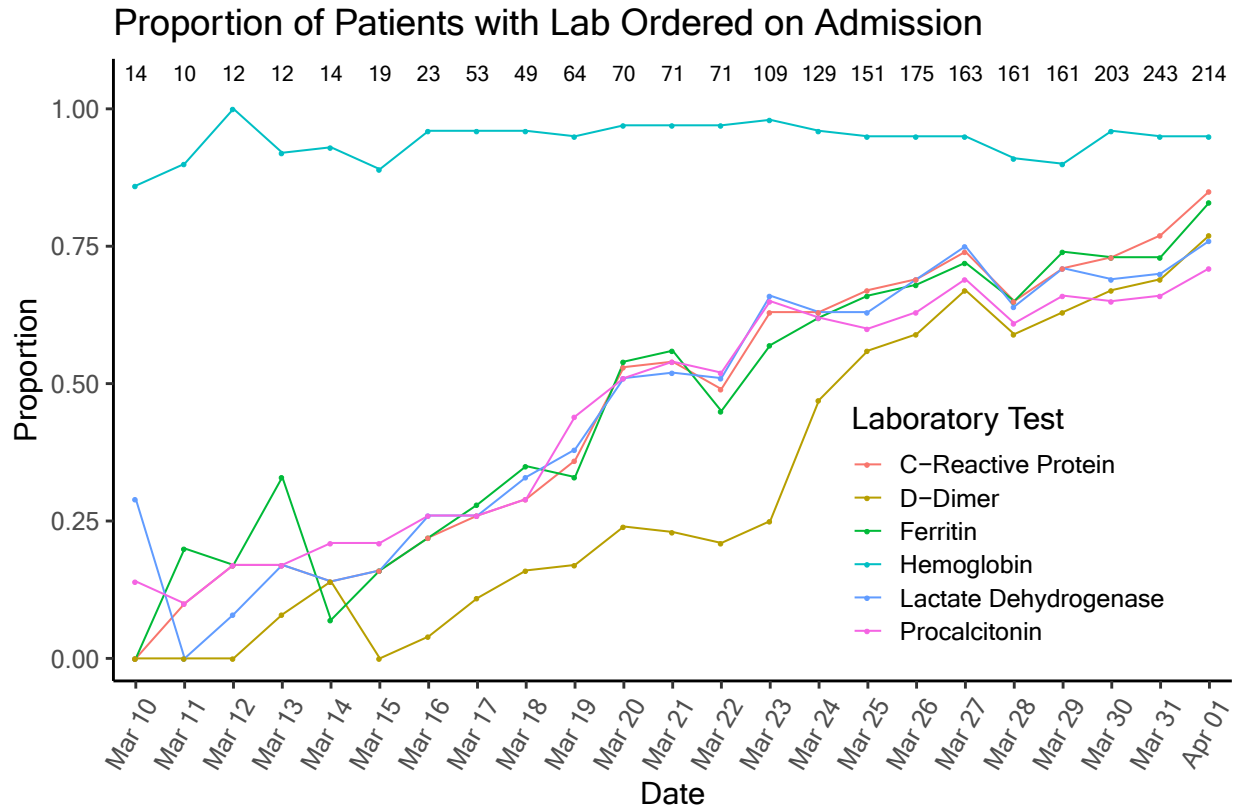

**Supplementary Figure 2** Trends in laboratory test orders per day. Tests that comprised the Mount Sinai Health System COVID-19 special order (C-reactive protein, d-dimer, ferritin, hemoglobin, lactate dehydrogenase, procalcitonin) set were included. Number of orders of hemoglobin were also included as a comparison. We only included dates in which there were at least 10 COVID-19 patients admitted (i.e., 03/10/2020). We included data up to 04/01/2020 to leave a full 24 hours for the tests to be ordered.

| DIAGNOSIS           | CODE   | TYPE  | DESCRIPTION                                            |
|---------------------|--------|-------|--------------------------------------------------------|
| Atrial fibrillation | 427.3  | ICD9  | Atrial fibrillation and flutter                        |
| Atrial fibrillation | 427.31 | ICD9  | Atrial fibrillation                                    |
| Atrial fibrillation | 427.32 | ICD9  | Atrial flutter                                         |
| Atrial fibrillation | I48    | ICD10 | Atrial fibrillation and flutter                        |
| Atrial fibrillation | I48.0  | ICD10 | Paroxysmal atrial fibrillation                         |
| Atrial fibrillation | I48.1  | ICD10 | Persistent atrial fibrillation                         |
| Atrial fibrillation | I48.2  | ICD10 | Chronic atrial fibrillation                            |
| Atrial fibrillation | I48.3  | ICD10 | Typical atrial flutter                                 |
| Atrial fibrillation | I48.4  | ICD10 | Atypical atrial flutter                                |
| Atrial fibrillation | I48.91 | ICD10 | Unspecified atrial fibrillation                        |
| Atrial fibrillation | I48.92 | ICD10 | Unspecified atrial flutter                             |
| Asthma              | 493    | ICD9  | Asthma                                                 |
| Asthma              | 493    | ICD9  | Extrinsic asthma                                       |
| Asthma              | 493    | ICD9  | Extrinsic asthma without mention of status asthmaticus |
| Asthma              | 493.01 | ICD9  | Extrinsic asthma with status asthmaticus               |
| Asthma              | 493.02 | ICD9  | Extrinsic asthma with acute exacerbation               |
| Asthma              | 493.1  | ICD9  | Intrinsic asthma                                       |
| Asthma              | 493.1  | ICD9  | Intrinsic asthma without mention of status asthmaticus |
| Asthma              | 493.11 | ICD9  | Intrinsic asthma with status asthmaticus               |
| Asthma              | 493.12 | ICD9  | Intrinsic asthma with acute exacerbation               |
| Asthma              | 493.2  | ICD9  | Chronic obstructive asthma                             |
| Asthma              | 493.2  | ICD9  | Chronic obstructive asthma                             |
| Asthma              | 493.21 | ICD9  | Chronic obstructive asthma                             |
| Asthma              | 493.22 | ICD9  | Chronic obstructive asthma                             |
| Asthma              | 493.8  | ICD9  | Other forms of asthma                                  |
| Asthma              | 493.81 | ICD9  | Exercise induced bronchospasm                          |
| Asthma              | 493.82 | ICD9  | Cough variant asthma                                   |
| Asthma              | 493.9  | ICD9  | Asthma                                                 |
| Asthma              | 493.9  | ICD9  | Asthma                                                 |
| Asthma              | 493.91 | ICD9  | Asthma                                                 |
| Asthma              | 493.92 | ICD9  | Asthma                                                 |
| Asthma              | J45.0  | ICD10 | Asthma                                                 |
| Asthma              | J45.20 | ICD10 | Mild intermittent asthma                               |
| Asthma              | J45.21 | ICD10 | Mild intermittent asthma with (acute) exacerbation     |
| Asthma              | J45.22 | ICD10 | Mild intermittent asthma with status asthmaticus       |

|                         |         |       |                                                                   |
|-------------------------|---------|-------|-------------------------------------------------------------------|
| Asthma                  | J45.30  | ICD10 | Mild persistent asthma                                            |
| Asthma                  | J45.31  | ICD10 | Mild persistent asthma with (acute) exacerbation                  |
| Asthma                  | J45.32  | ICD10 | Mild persistent asthma with status asthmaticus                    |
| Asthma                  | J45.40  | ICD10 | Moderate persistent asthma                                        |
| Asthma                  | J45.41  | ICD10 | Moderate persistent asthma with (acute) exacerbation              |
| Asthma                  | J45.42  | ICD10 | Moderate persistent asthma with status asthmaticus                |
| Asthma                  | J45.50  | ICD10 | Severe persistent asthma                                          |
| Asthma                  | J45.51  | ICD10 | Severe persistent asthma with (acute) exacerbation                |
| Asthma                  | J45.52  | ICD10 | Severe persistent asthma with status asthmaticus                  |
| Asthma                  | J45.90  | ICD10 | Unspecified asthma                                                |
| Asthma                  | J45.901 | ICD10 | Unspecified asthma with (acute) exacerbation                      |
| Asthma                  | J45.902 | ICD10 | Unspecified asthma with status asthmaticus                        |
| Asthma                  | J45.909 | ICD10 | Unspecified asthma                                                |
| Asthma                  | J45.990 | ICD10 | Exercise induced bronchospasm                                     |
| Asthma                  | J45.991 | ICD10 | Cough variant asthma                                              |
| Asthma                  | J45.998 | ICD10 | Other asthma                                                      |
| Coronary artery disease | 411.81  | ICD9  | Acute coronary occlusion without myocardial infarction            |
| Coronary artery disease | 414     | ICD9  | Coronary atherosclerosis                                          |
| Coronary artery disease | 414     | ICD9  | Coronary atherosclerosis of unspecified type of vessel            |
| Coronary artery disease | 414.01  | ICD9  | Coronary atherosclerosis of native coronary artery                |
| Coronary artery disease | 414.02  | ICD9  | Coronary atherosclerosis of autologous biological bypass graft    |
| Coronary artery disease | 414.03  | ICD9  | Coronary atherosclerosis of nonautologous biological bypass graft |
| Coronary artery disease | 414.04  | ICD9  | Coronary atherosclerosis of artery bypass graft                   |
| Coronary artery disease | 414.05  | ICD9  | Coronary atherosclerosis of unspecified type of bypass graft      |



|                         |        |      |                                                           |
|-------------------------|--------|------|-----------------------------------------------------------|
| Coronary artery disease | 414.2  | ICD9 | Chronic total occlusion of coronary artery                |
| Coronary artery disease | 414.3  | ICD9 | Coronary atherosclerosis due to lipid rich plaque         |
| Coronary artery disease | 414.4  | ICD9 | Coronary atherosclerosis due to calcified coronary lesion |
| Coronary artery disease | 410    | ICD9 | Acute myocardial infarction                               |
| Coronary artery disease | 410    | ICD9 | Acute myocardial infarction                               |
| Coronary artery disease | 410    | ICD9 | Acute myocardial infarction                               |
| Coronary artery disease | 410.01 | ICD9 | Acute myocardial infarction                               |
| Coronary artery disease | 410.02 | ICD9 | Acute myocardial infarction                               |
| Coronary artery disease | 410.1  | ICD9 | Acute myocardial infarction                               |
| Coronary artery disease | 410.1  | ICD9 | Acute myocardial infarction                               |
| Coronary artery disease | 410.11 | ICD9 | Acute myocardial infarction                               |
| Coronary artery disease | 410.12 | ICD9 | Acute myocardial infarction                               |
| Coronary artery disease | 410.2  | ICD9 | Acute myocardial infarction                               |
| Coronary artery disease | 410.2  | ICD9 | Acute myocardial infarction                               |
| Coronary artery disease | 410.21 | ICD9 | Acute myocardial infarction                               |
| Coronary artery disease | 410.22 | ICD9 | Acute myocardial infarction                               |
| Coronary artery disease | 410.3  | ICD9 | Acute myocardial infarction                               |
| Coronary artery disease | 410.3  | ICD9 | Acute myocardial infarction                               |
| Coronary artery disease | 410.31 | ICD9 | Acute myocardial infarction                               |
| Coronary artery disease | 410.32 | ICD9 | Acute myocardial infarction                               |

|                         |        |      |                             |
|-------------------------|--------|------|-----------------------------|
| Coronary artery disease | 410.4  | ICD9 | Acute myocardial infarction |
| Coronary artery disease | 410.4  | ICD9 | Acute myocardial infarction |
| Coronary artery disease | 410.41 | ICD9 | Acute myocardial infarction |
| Coronary artery disease | 410.42 | ICD9 | Acute myocardial infarction |
| Coronary artery disease | 410.5  | ICD9 | Acute myocardial infarction |
| Coronary artery disease | 410.5  | ICD9 | Acute myocardial infarction |
| Coronary artery disease | 410.51 | ICD9 | Acute myocardial infarction |
| Coronary artery disease | 410.52 | ICD9 | Acute myocardial infarction |
| Coronary artery disease | 410.6  | ICD9 | Acute myocardial infarction |
| Coronary artery disease | 410.6  | ICD9 | Acute myocardial infarction |
| Coronary artery disease | 410.61 | ICD9 | Acute myocardial infarction |
| Coronary artery disease | 410.62 | ICD9 | Acute myocardial infarction |
| Coronary artery disease | 410.7  | ICD9 | Acute myocardial infarction |
| Coronary artery disease | 410.7  | ICD9 | Acute myocardial infarction |
| Coronary artery disease | 410.71 | ICD9 | Acute myocardial infarction |
| Coronary artery disease | 410.72 | ICD9 | Acute myocardial infarction |
| Coronary artery disease | 410.8  | ICD9 | Acute myocardial infarction |
| Coronary artery disease | 410.8  | ICD9 | Acute myocardial infarction |
| Coronary artery disease | 410.81 | ICD9 | Acute myocardial infarction |
| Coronary artery disease | 410.82 | ICD9 | Acute myocardial infarction |

|                         |         |       |                                                                                                    |
|-------------------------|---------|-------|----------------------------------------------------------------------------------------------------|
| Coronary artery disease | 410.9   | ICD9  | Acute myocardial infarction                                                                        |
| Coronary artery disease | 410.9   | ICD9  | Acute myocardial infarction                                                                        |
| Coronary artery disease | 410.91  | ICD9  | Acute myocardial infarction                                                                        |
| Coronary artery disease | 410.92  | ICD9  | Acute myocardial infarction                                                                        |
| Coronary artery disease | 411     | ICD9  | Postmyocardial infarction syndrome                                                                 |
| Coronary artery disease | 412     | ICD9  | Old myocardial infarction                                                                          |
| Coronary artery disease | 429.7   | ICD9  | Certain sequelae of myocardial infarction                                                          |
| Coronary artery disease | 429.71  | ICD9  | Cardiac septal defect                                                                              |
| Coronary artery disease | 429.79  | ICD9  | Other sequelae of myocardial infarction                                                            |
| Coronary artery disease | I24.0   | ICD10 | Acute coronary thrombosis not resulting in myocardial infarction                                   |
| Coronary artery disease | I25.1   | ICD10 | Atherosclerotic heart disease of native coronary artery                                            |
| Coronary artery disease | I25.10  | ICD10 | Atherosclerotic heart disease of native coronary artery without angina pectoris                    |
| Coronary artery disease | I25.110 | ICD10 | Atherosclerotic heart disease of native coronary artery with unstable angina pectoris              |
| Coronary artery disease | I25.111 | ICD10 | Atherosclerotic heart disease of native coronary artery with angina pectoris with documented spasm |
| Coronary artery disease | I25.118 | ICD10 | Atherosclerotic heart disease of native coronary artery with other forms of angina pectoris        |
| Coronary artery disease | I25.119 | ICD10 | Atherosclerotic heart disease of native coronary artery with unspecified angina pectoris           |
| Coronary artery disease | I25.700 | ICD10 | Atherosclerosis of coronary artery bypass graft(s)                                                 |
| Coronary artery disease | I25.701 | ICD10 | Atherosclerosis of coronary artery bypass graft(s)                                                 |

|                         |         |       |                                                                                                                 |
|-------------------------|---------|-------|-----------------------------------------------------------------------------------------------------------------|
| Coronary artery disease | I25.708 | ICD10 | Atherosclerosis of coronary artery bypass graft(s)                                                              |
| Coronary artery disease | I25.709 | ICD10 | Atherosclerosis of coronary artery bypass graft(s)                                                              |
| Coronary artery disease | I25.710 | ICD10 | Atherosclerosis of autologous vein coronary artery bypass graft(s) with unstable angina pectoris                |
| Coronary artery disease | I25.711 | ICD10 | Atherosclerosis of autologous vein coronary artery bypass graft(s) with angina pectoris with documented spasm   |
| Coronary artery disease | I25.718 | ICD10 | Atherosclerosis of autologous vein coronary artery bypass graft(s) with other forms of angina pectoris          |
| Coronary artery disease | I25.719 | ICD10 | Atherosclerosis of autologous vein coronary artery bypass graft(s) with unspecified angina pectoris             |
| Coronary artery disease | I25.720 | ICD10 | Atherosclerosis of autologous artery coronary artery bypass graft(s) with unstable angina pectoris              |
| Coronary artery disease | I25.721 | ICD10 | Athscl autologous artery CABG w ang pctrs w documented spasm                                                    |
| Coronary artery disease | I25.728 | ICD10 | Atherosclerosis of autologous artery coronary artery bypass graft(s) with other forms of angina pectoris        |
| Coronary artery disease | I25.729 | ICD10 | Atherosclerosis of autologous artery coronary artery bypass graft(s) with unspecified angina pectoris           |
| Coronary artery disease | I25.730 | ICD10 | Atherosclerosis of nonautologous biological coronary artery bypass graft(s) with unstable angina pectoris       |
| Coronary artery disease | I25.731 | ICD10 | Athscl nonaut biological CABG w ang pctrs w documented spasm                                                    |
| Coronary artery disease | I25.738 | ICD10 | Atherosclerosis of nonautologous biological coronary artery bypass graft(s) with other forms of angina pectoris |
| Coronary artery disease | I25.739 | ICD10 | Atherosclerosis of nonautologous biological coronary artery bypass graft(s) with unspecified angina pectoris    |
| Coronary artery disease | I25.790 | ICD10 | Atherosclerosis of other coronary artery bypass graft(s) with unstable angina pectoris                          |

|                         |         |       |                                                                                                     |
|-------------------------|---------|-------|-----------------------------------------------------------------------------------------------------|
| Coronary artery disease | I25.791 | ICD10 | Atherosclerosis of other coronary artery bypass graft(s) with angina pectoris with documented spasm |
| Coronary artery disease | I25.798 | ICD10 | Atherosclerosis of other coronary artery bypass graft(s) with other forms of angina pectoris        |
| Coronary artery disease | I25.799 | ICD10 | Atherosclerosis of other coronary artery bypass graft(s) with unspecified angina pectoris           |
| Coronary artery disease | I25.810 | ICD10 | Atherosclerosis of coronary artery bypass graft(s) without angina pectoris                          |
| Coronary artery disease | I25.82  | ICD10 | Chronic total occlusion of coronary artery                                                          |
| Coronary artery disease | I25.83  | ICD10 | Coronary atherosclerosis due to lipid rich plaque                                                   |
| Coronary artery disease | I25.84  | ICD10 | Coronary atherosclerosis due to calcified coronary lesion                                           |
| Coronary artery disease | I21     | ICD10 | Acute myocardial infarction                                                                         |
| Coronary artery disease | I23.1   | ICD10 | Atrial septal defect as current complication following acute myocardial infarction                  |
| Coronary artery disease | I51.0   | ICD10 | Cardiac septal defect                                                                               |
| Coronary artery disease | I24.1   | ICD10 | Dressler's syndrome                                                                                 |
| Coronary artery disease | I23.0   | ICD10 | Hemopericardium as current complication following acute myocardial infarction                       |
| Coronary artery disease | I51.3   | ICD10 | Intracardiac thrombosis                                                                             |
| Coronary artery disease | I21.9   | ICD10 | Myocardial infarction (acute) NOS                                                                   |
| Coronary artery disease | I21.A1  | ICD10 | Myocardial infarction type 2                                                                        |
| Coronary artery disease | I21.4   | ICD10 | Non-ST elevation (NSTEMI) myocardial infarction                                                     |
| Coronary artery disease | I25.2   | ICD10 | Old myocardial infarction                                                                           |

|                         |        |       |                                                                                                               |
|-------------------------|--------|-------|---------------------------------------------------------------------------------------------------------------|
| Coronary artery disease | I23.8  | ICD10 | Other current complications following acute myocardial infarction                                             |
| Coronary artery disease | I21.A9 | ICD10 | Other myocardial infarction type                                                                              |
| Coronary artery disease | I21.A  | ICD10 | Other type of myocardial infarction                                                                           |
| Coronary artery disease | I23.7  | ICD10 | Postinfarction angina                                                                                         |
| Coronary artery disease | I23.3  | ICD10 | Rupture of cardiac wall without hemopericardium as current complication following acute myocardial infarction |
| Coronary artery disease | I21.02 | ICD10 | ST elevation (STEMI) myocardial infarction involving left anterior descending coronary artery                 |
| Coronary artery disease | I21.21 | ICD10 | ST elevation (STEMI) myocardial infarction involving left circumflex coronary artery                          |
| Coronary artery disease | I21.01 | ICD10 | ST elevation (STEMI) myocardial infarction involving left main coronary artery                                |
| Coronary artery disease | I21.09 | ICD10 | ST elevation (STEMI) myocardial infarction involving other coronary artery of anterior wall                   |
| Coronary artery disease | I21.19 | ICD10 | ST elevation (STEMI) myocardial infarction involving other coronary artery of inferior wall                   |
| Coronary artery disease | I21.29 | ICD10 | ST elevation (STEMI) myocardial infarction involving other sites                                              |
| Coronary artery disease | I21.11 | ICD10 | ST elevation (STEMI) myocardial infarction involving right coronary artery                                    |
| Coronary artery disease | I21.0  | ICD10 | ST elevation (STEMI) myocardial infarction of anterior wall                                                   |
| Coronary artery disease | I21.1  | ICD10 | ST elevation (STEMI) myocardial infarction of inferior wall                                                   |
| Coronary artery disease | I21.2  | ICD10 | ST elevation (STEMI) myocardial infarction of other sites                                                     |
| Coronary artery disease | I21.3  | ICD10 | ST elevation (STEMI) myocardial infarction of unspecified site                                                |

|                         |       |       |                                                                                         |
|-------------------------|-------|-------|-----------------------------------------------------------------------------------------|
| Coronary artery disease | I22.2 | ICD10 | Subsequent non-ST elevation (NSTEMI) myocardial infarction                              |
| Coronary artery disease | I22   | ICD10 | Subsequent ST elevation (STEMI) and non-ST elevation (NSTEMI) myocardial infarction     |
| Coronary artery disease | I22.0 | ICD10 | Subsequent ST elevation (STEMI) myocardial infarction of anterior wall                  |
| Coronary artery disease | I22.1 | ICD10 | Subsequent ST elevation (STEMI) myocardial infarction of inferior wall                  |
| Coronary artery disease | I22.8 | ICD10 | Subsequent ST elevation (STEMI) myocardial infarction of other sites                    |
| Coronary artery disease | I22.9 | ICD10 | Subsequent ST elevation (STEMI) myocardial infarction of unspecified site               |
| Coronary artery disease | I23.6 | ICD10 | Thrombosis of atrium                                                                    |
| Coronary artery disease | I23.2 | ICD10 | Ventricular septal defect as current complication following acute myocardial infarction |
| Cancer                  | 140   | ICD9  | Malignant neoplasm of lip                                                               |
| Cancer                  | 140   | ICD9  | Malignant neoplasm of upper lip                                                         |
| Cancer                  | 140.1 | ICD9  | Malignant neoplasm of lower lip                                                         |
| Cancer                  | 140.3 | ICD9  | Malignant neoplasm of upper lip                                                         |
| Cancer                  | 140.4 | ICD9  | Malignant neoplasm of lower lip                                                         |
| Cancer                  | 140.5 | ICD9  | Malignant neoplasm of lip                                                               |
| Cancer                  | 140.6 | ICD9  | Malignant neoplasm of commissure of lip                                                 |
| Cancer                  | 140.8 | ICD9  | Malignant neoplasm of other sites of lip                                                |
| Cancer                  | 140.9 | ICD9  | Malignant neoplasm of lip                                                               |
| Cancer                  | 141   | ICD9  | Malignant neoplasm of tongue                                                            |
| Cancer                  | 141   | ICD9  | Malignant neoplasm of base of tongue                                                    |
| Cancer                  | 141.1 | ICD9  | Malignant neoplasm of dorsal surface of tongue                                          |
| Cancer                  | 141.2 | ICD9  | Malignant neoplasm of tip and lateral border of tongue                                  |
| Cancer                  | 141.3 | ICD9  | Malignant neoplasm of ventral surface of tongue                                         |
| Cancer                  | 141.4 | ICD9  | Malignant neoplasm of anterior two-thirds of tongue                                     |
| Cancer                  | 141.5 | ICD9  | Malignant neoplasm of junctional zone of tongue                                         |

|        |       |      |                                                            |
|--------|-------|------|------------------------------------------------------------|
| Cancer | 141.6 | ICD9 | Malignant neoplasm of lingual tonsil                       |
|        |       |      | Malignant neoplasm of other sites of tongue                |
| Cancer | 141.8 | ICD9 | Malignant neoplasm of tongue                               |
| Cancer | 141.9 | ICD9 | Malignant neoplasm of tongue                               |
|        |       |      | Malignant neoplasm of major salivary glands                |
| Cancer | 142   | ICD9 | Malignant neoplasm of parotid gland                        |
|        |       |      | Malignant neoplasm of submandibular gland                  |
| Cancer | 142.1 | ICD9 | Malignant neoplasm of sublingual gland                     |
| Cancer | 142.2 | ICD9 | Malignant neoplasm of other major salivary glands          |
| Cancer | 142.8 | ICD9 | Malignant neoplasm of salivary gland                       |
| Cancer | 142.9 | ICD9 | Malignant neoplasm of gum                                  |
| Cancer | 143   | ICD9 | Malignant neoplasm of upper gum                            |
| Cancer | 143   | ICD9 | Malignant neoplasm of lower gum                            |
|        |       |      | Malignant neoplasm of other sites of gum                   |
| Cancer | 143.8 | ICD9 | Malignant neoplasm of gum                                  |
| Cancer | 143.9 | ICD9 | Malignant neoplasm of floor of mouth                       |
| Cancer | 144   | ICD9 | Malignant neoplasm of anterior portion of floor of mouth   |
|        |       |      | Malignant neoplasm of lateral portion of floor of mouth    |
| Cancer | 144.1 | ICD9 | Malignant neoplasm of other sites of floor of mouth        |
| Cancer | 144.8 | ICD9 | Malignant neoplasm of floor of mouth                       |
| Cancer | 144.9 | ICD9 | Malignant neoplasm of other and unspecified parts of mouth |
| Cancer | 145   | ICD9 | Malignant neoplasm of cheek mucosa                         |
|        |       |      | Malignant neoplasm of vestibule of mouth                   |
| Cancer | 145.1 | ICD9 | Malignant neoplasm of hard palate                          |
| Cancer | 145.2 | ICD9 | Malignant neoplasm of soft palate                          |
| Cancer | 145.3 | ICD9 | Malignant neoplasm of uvula                                |
| Cancer | 145.4 | ICD9 | Malignant neoplasm of palate                               |
| Cancer | 145.5 | ICD9 | Malignant neoplasm of retromolar area                      |
|        |       |      | Malignant neoplasm of other specified parts of mouth       |
| Cancer | 145.8 | ICD9 | Malignant neoplasm of mouth                                |
| Cancer | 145.9 | ICD9 | Malignant neoplasm of mouth                                |



|        |       |      |                                                                |
|--------|-------|------|----------------------------------------------------------------|
| Cancer | 146   | ICD9 | Malignant neoplasm of oropharynx                               |
| Cancer | 146   | ICD9 | Malignant neoplasm of tonsil                                   |
| Cancer | 146.1 | ICD9 | Malignant neoplasm of tonsillar fossa                          |
| Cancer | 146.2 | ICD9 | Malignant neoplasm of tonsillar pillars (anterior) (posterior) |
| Cancer | 146.3 | ICD9 | Malignant neoplasm of vallecula                                |
| Cancer | 146.4 | ICD9 | Malignant neoplasm of anterior aspect of epiglottis            |
| Cancer | 146.5 | ICD9 | Malignant neoplasm of junctional region of oropharynx          |
| Cancer | 146.6 | ICD9 | Malignant neoplasm of lateral wall of oropharynx               |
| Cancer | 146.7 | ICD9 | Malignant neoplasm of posterior wall of oropharynx             |
| Cancer | 146.8 | ICD9 | Malignant neoplasm of other specified sites of oropharynx      |
| Cancer | 146.9 | ICD9 | Malignant neoplasm of oropharynx                               |
| Cancer | 147   | ICD9 | Malignant neoplasm of nasopharynx                              |
| Cancer | 147   | ICD9 | Malignant neoplasm of superior wall of nasopharynx             |
| Cancer | 147.1 | ICD9 | Malignant neoplasm of posterior wall of nasopharynx            |
| Cancer | 147.2 | ICD9 | Malignant neoplasm of lateral wall of nasopharynx              |
| Cancer | 147.3 | ICD9 | Malignant neoplasm of anterior wall of nasopharynx             |
| Cancer | 147.8 | ICD9 | Malignant neoplasm of other specified sites of nasopharynx     |
| Cancer | 147.9 | ICD9 | Malignant neoplasm of nasopharynx                              |
| Cancer | 148   | ICD9 | Malignant neoplasm of hypopharynx                              |
| Cancer | 148   | ICD9 | Malignant neoplasm of postcricoid region of hypopharynx        |
| Cancer | 148.1 | ICD9 | Malignant neoplasm of pyriform sinus                           |
| Cancer | 148.2 | ICD9 | Malignant neoplasm of aryepiglottic fold                       |
| Cancer | 148.3 | ICD9 | Malignant neoplasm of posterior hypopharyngeal wall            |
| Cancer | 148.8 | ICD9 | Malignant neoplasm of other specified sites of hypopharynx     |
| Cancer | 148.9 | ICD9 | Malignant neoplasm of hypopharynx                              |

|        |       |      |                                                                        |
|--------|-------|------|------------------------------------------------------------------------|
| Cancer | 149   | ICD9 | Malignant neoplasm of other and ill-defined sites within the lip       |
| Cancer | 149   | ICD9 | Malignant neoplasm of pharynx                                          |
| Cancer | 149.1 | ICD9 | Malignant neoplasm of waldeyer's ring                                  |
| Cancer | 149.8 | ICD9 | Malignant neoplasm of other sites within the lip and oral cavity       |
| Cancer | 149.9 | ICD9 | Malignant neoplasm of ill-defined sites within the lip and oral cavity |
| Cancer | 150   | ICD9 | Malignant neoplasm of esophagus                                        |
| Cancer | 150   | ICD9 | Malignant neoplasm of cervical esophagus                               |
| Cancer | 150.1 | ICD9 | Malignant neoplasm of thoracic esophagus                               |
| Cancer | 150.2 | ICD9 | Malignant neoplasm of abdominal esophagus                              |
| Cancer | 150.3 | ICD9 | Malignant neoplasm of upper third of esophagus                         |
| Cancer | 150.4 | ICD9 | Malignant neoplasm of middle third of esophagus                        |
| Cancer | 150.5 | ICD9 | Malignant neoplasm of lower third of esophagus                         |
| Cancer | 150.8 | ICD9 | Malignant neoplasm of other specified part of esophagus                |
| Cancer | 150.9 | ICD9 | Malignant neoplasm of esophagus                                        |
| Cancer | 151   | ICD9 | Malignant neoplasm of stomach                                          |
| Cancer | 151   | ICD9 | Malignant neoplasm of cardia                                           |
| Cancer | 151.1 | ICD9 | Malignant neoplasm of pylorus                                          |
| Cancer | 151.2 | ICD9 | Malignant neoplasm of pyloric antrum                                   |
| Cancer | 151.3 | ICD9 | Malignant neoplasm of fundus of stomach                                |
| Cancer | 151.4 | ICD9 | Malignant neoplasm of body of stomach                                  |
| Cancer | 151.5 | ICD9 | Malignant neoplasm of lesser curvature of stomach                      |
| Cancer | 151.6 | ICD9 | Malignant neoplasm of greater curvature of stomach                     |
| Cancer | 151.8 | ICD9 | Malignant neoplasm of other specified sites of stomach                 |
| Cancer | 151.9 | ICD9 | Malignant neoplasm of stomach                                          |
| Cancer | 153   | ICD9 | Malignant neoplasm of colon                                            |
| Cancer | 153   | ICD9 | Malignant neoplasm of hepatic flexure                                  |

|        |       |      |                                                                |
|--------|-------|------|----------------------------------------------------------------|
| Cancer | 153.1 | ICD9 | Malignant neoplasm of transverse colon                         |
| Cancer | 153.2 | ICD9 | Malignant neoplasm of descending colon                         |
| Cancer | 153.3 | ICD9 | Malignant neoplasm of sigmoid colon                            |
| Cancer | 153.4 | ICD9 | Malignant neoplasm of cecum                                    |
| Cancer | 153.5 | ICD9 | Malignant neoplasm of appendix vermiformis                     |
| Cancer | 153.6 | ICD9 | Malignant neoplasm of ascending colon                          |
| Cancer | 153.7 | ICD9 | Malignant neoplasm of splenic flexure                          |
| Cancer | 153.8 | ICD9 | Malignant neoplasm of other specified sites of large intestine |
| Cancer | 153.9 | ICD9 | Malignant neoplasm of colon                                    |
| Cancer | 154.8 | ICD9 | Malignant neoplasm of other sites of rectum                    |
| Cancer | 155   | ICD9 | Malignant neoplasm of liver and intrahepatic bile ducts        |
| Cancer | 155.1 | ICD9 | Malignant neoplasm of intrahepatic bile ducts                  |
| Cancer | 155.2 | ICD9 | Malignant neoplasm of liver                                    |
| Cancer | 157   | ICD9 | Malignant neoplasm of pancreas                                 |
| Cancer | 157   | ICD9 | Malignant neoplasm of head of pancreas                         |
| Cancer | 157.1 | ICD9 | Malignant neoplasm of body of pancreas                         |
| Cancer | 157.2 | ICD9 | Malignant neoplasm of tail of pancreas                         |
| Cancer | 157.3 | ICD9 | Malignant neoplasm of pancreatic duct                          |
| Cancer | 157.4 | ICD9 | Malignant neoplasm of islets of Langerhans                     |
| Cancer | 157.8 | ICD9 | Malignant neoplasm of other specified sites of pancreas        |
| Cancer | 157.9 | ICD9 | Malignant neoplasm of pancreas                                 |
| Cancer | 159   | ICD9 | Malignant neoplasm of intestinal tract                         |
| Cancer | 160   | ICD9 | Malignant neoplasm of nasal cavities                           |
| Cancer | 160   | ICD9 | Malignant neoplasm of nasal cavities                           |
| Cancer | 160.1 | ICD9 | Malignant neoplasm of auditory tube                            |
| Cancer | 160.2 | ICD9 | Malignant neoplasm of maxillary sinus                          |
| Cancer | 160.3 | ICD9 | Malignant neoplasm of ethmoidal sinus                          |
| Cancer | 160.4 | ICD9 | Malignant neoplasm of frontal sinus                            |
| Cancer | 160.5 | ICD9 | Malignant neoplasm of sphenoidal sinus                         |
| Cancer | 160.8 | ICD9 | Malignant neoplasm of other accessory sinuses                  |
| Cancer | 160.9 | ICD9 | Malignant neoplasm of accessory sinus                          |
| Cancer | 161   | ICD9 | Malignant neoplasm of larynx                                   |

|        |       |      |                                                                                                          |
|--------|-------|------|----------------------------------------------------------------------------------------------------------|
| Cancer | 161   | ICD9 | Malignant neoplasm of glottis                                                                            |
| Cancer | 161.1 | ICD9 | Malignant neoplasm of supraglottis                                                                       |
| Cancer | 161.2 | ICD9 | Malignant neoplasm of subglottis                                                                         |
| Cancer | 161.3 | ICD9 | Malignant neoplasm of laryngeal cartilages                                                               |
| Cancer | 161.8 | ICD9 | Malignant neoplasm of other specified sites of larynx                                                    |
| Cancer | 161.9 | ICD9 | Malignant neoplasm of larynx                                                                             |
| Cancer | 162   | ICD9 | Malignant neoplasm of trachea                                                                            |
| Cancer | 162   | ICD9 | Malignant neoplasm of trachea                                                                            |
| Cancer | 162.2 | ICD9 | Malignant neoplasm of main bronchus                                                                      |
| Cancer | 162.3 | ICD9 | Malignant neoplasm of upper lobe                                                                         |
| Cancer | 162.4 | ICD9 | Malignant neoplasm of middle lobe                                                                        |
| Cancer | 162.5 | ICD9 | Malignant neoplasm of lower lobe                                                                         |
| Cancer | 162.8 | ICD9 | Malignant neoplasm of other parts of bronchus or lung                                                    |
| Cancer | 162.9 | ICD9 | Malignant neoplasm of bronchus and lung                                                                  |
| Cancer | 163   | ICD9 | Malignant neoplasm of pleura                                                                             |
| Cancer | 163   | ICD9 | Malignant neoplasm of parietal pleura                                                                    |
| Cancer | 163.1 | ICD9 | Malignant neoplasm of visceral pleura                                                                    |
| Cancer | 163.8 | ICD9 | Malignant neoplasm of other specified sites of pleura                                                    |
| Cancer | 163.9 | ICD9 | Malignant neoplasm of pleura                                                                             |
| Cancer | 164   | ICD9 | Malignant neoplasm of thymus                                                                             |
| Cancer | 164   | ICD9 | Malignant neoplasm of thymus                                                                             |
| Cancer | 164.1 | ICD9 | Malignant neoplasm of heart                                                                              |
| Cancer | 164.2 | ICD9 | Malignant neoplasm of anterior mediastinum                                                               |
| Cancer | 164.3 | ICD9 | Malignant neoplasm of posterior mediastinum                                                              |
| Cancer | 164.8 | ICD9 | Malignant neoplasm of other parts of mediastinum                                                         |
| Cancer | 164.9 | ICD9 | Malignant neoplasm of mediastinum                                                                        |
| Cancer | 165   | ICD9 | Malignant neoplasm of other and ill-defined sites within the respiratory system and intrathoracic organs |
| Cancer | 165   | ICD9 | Malignant neoplasm of upper respiratory tract                                                            |

|        |       |      |                                                                                          |
|--------|-------|------|------------------------------------------------------------------------------------------|
| Cancer | 165.8 | ICD9 | Malignant neoplasm of other sites within the respiratory system and intrathoracic organs |
| Cancer | 165.9 | ICD9 | Malignant neoplasm of ill-defined sites within the respiratory system                    |
| Cancer | 170   | ICD9 | Malignant neoplasm of bone and articular cartilage                                       |
| Cancer | 170   | ICD9 | Malignant neoplasm of bones of skull and face                                            |
| Cancer | 170.1 | ICD9 | Malignant neoplasm of mandible                                                           |
| Cancer | 170.2 | ICD9 | Malignant neoplasm of vertebral column                                                   |
| Cancer | 170.3 | ICD9 | Malignant neoplasm of ribs                                                               |
| Cancer | 170.4 | ICD9 | Malignant neoplasm of scapula and long bones of upper limb                               |
| Cancer | 170.5 | ICD9 | Malignant neoplasm of short bones of upper limb                                          |
| Cancer | 170.6 | ICD9 | Malignant neoplasm of pelvic bones                                                       |
| Cancer | 170.7 | ICD9 | Malignant neoplasm of long bones of lower limb                                           |
| Cancer | 170.8 | ICD9 | Malignant neoplasm of short bones of lower limb                                          |
| Cancer | 170.9 | ICD9 | Malignant neoplasm of bone and articular cartilage                                       |
| Cancer | 171   | ICD9 | Malignant neoplasm of connective and other soft tissue                                   |
| Cancer | 171   | ICD9 | Malignant neoplasm of connective and other soft tissue of head                           |
| Cancer | 171.2 | ICD9 | Malignant neoplasm of connective and other soft tissue of upper limb                     |
| Cancer | 171.3 | ICD9 | Malignant neoplasm of connective and other soft tissue of lower limb                     |
| Cancer | 171.4 | ICD9 | Malignant neoplasm of connective and other soft tissue of thorax                         |
| Cancer | 171.5 | ICD9 | Malignant neoplasm of connective and other soft tissue of abdomen                        |
| Cancer | 171.6 | ICD9 | Malignant neoplasm of connective and other soft tissue of pelvis                         |
| Cancer | 171.7 | ICD9 | Malignant neoplasm of connective and other soft tissue of trunk                          |

|        |        |      |                                                                                   |
|--------|--------|------|-----------------------------------------------------------------------------------|
| Cancer | 171.8  | ICD9 | Malignant neoplasm of other specified sites of connective and other soft tissue   |
| Cancer | 171.9  | ICD9 | Malignant neoplasm of connective and other soft tissue                            |
| Cancer | 173    | ICD9 | Other malignant neoplasm of skin                                                  |
| Cancer | 173    | ICD9 | Other malignant neoplasm of skin of lip                                           |
| Cancer | 173    | ICD9 | Unspecified malignant neoplasm of skin of lip                                     |
| Cancer | 173.09 | ICD9 | Other specified malignant neoplasm of skin of lip                                 |
| Cancer | 173.1  | ICD9 | Other malignant neoplasm of skin of eyelid                                        |
| Cancer | 173.1  | ICD9 | Unspecified malignant neoplasm of eyelid                                          |
| Cancer | 173.19 | ICD9 | Other specified malignant neoplasm of eyelid                                      |
| Cancer | 173.2  | ICD9 | Other malignant neoplasm of skin of ear and external auditory canal               |
| Cancer | 173.2  | ICD9 | Unspecified malignant neoplasm of skin of ear and external auditory canal         |
| Cancer | 173.29 | ICD9 | Other specified malignant neoplasm of skin of ear and external auditory canal     |
| Cancer | 173.3  | ICD9 | Other malignant neoplasm of skin of other and unspecified parts of face           |
| Cancer | 173.3  | ICD9 | Unspecified malignant neoplasm of skin of other and unspecified parts of face     |
| Cancer | 173.39 | ICD9 | Other specified malignant neoplasm of skin of other and unspecified parts of face |
| Cancer | 173.4  | ICD9 | Other malignant neoplasm of scalp and skin of neck                                |
| Cancer | 173.4  | ICD9 | Unspecified malignant neoplasm of scalp and skin of neck                          |
| Cancer | 173.49 | ICD9 | Other specified malignant neoplasm of scalp and skin of neck                      |
| Cancer | 173.5  | ICD9 | Other malignant neoplasm of skin of trunk                                         |
| Cancer | 173.5  | ICD9 | Unspecified malignant neoplasm of skin of trunk                                   |

|        |        |      |                                                                     |
|--------|--------|------|---------------------------------------------------------------------|
| Cancer | 173.59 | ICD9 | Other specified malignant neoplasm of skin of trunk                 |
| Cancer | 173.6  | ICD9 | Other malignant neoplasm of skin of upper limb                      |
| Cancer | 173.6  | ICD9 | Unspecified malignant neoplasm of skin of upper limb                |
| Cancer | 173.69 | ICD9 | Other specified malignant neoplasm of skin of upper limb            |
| Cancer | 173.7  | ICD9 | Other malignant neoplasm of skin of lower limb                      |
| Cancer | 173.7  | ICD9 | Unspecified malignant neoplasm of skin of lower limb                |
| Cancer | 173.79 | ICD9 | Other specified malignant neoplasm of skin of lower limb            |
| Cancer | 173.8  | ICD9 | Other malignant neoplasm of other specified sites of skin           |
| Cancer | 173.8  | ICD9 | Unspecified malignant neoplasm of other specified sites of skin     |
| Cancer | 173.89 | ICD9 | Other specified malignant neoplasm of other specified sites of skin |
| Cancer | 173.9  | ICD9 | Other malignant neoplasm of skin                                    |
| Cancer | 173.9  | ICD9 | Unspecified malignant neoplasm of skin                              |
| Cancer | 173.99 | ICD9 | Other specified malignant neoplasm of skin                          |
| Cancer | 175    | ICD9 | Malignant neoplasm of male breast                                   |
| Cancer | 175    | ICD9 | Malignant neoplasm of nipple and areola of male breast              |
| Cancer | 175.9  | ICD9 | Malignant neoplasm of other and unspecified sites of male breast    |
| Cancer | 180    | ICD9 | Malignant neoplasm of cervix uteri                                  |
| Cancer | 180    | ICD9 | Malignant neoplasm of endocervix                                    |
| Cancer | 180.1  | ICD9 | Malignant neoplasm of exocervix                                     |
| Cancer | 180.8  | ICD9 | Malignant neoplasm of other specified sites of cervix               |
| Cancer | 180.9  | ICD9 | Malignant neoplasm of cervix uteri                                  |
| Cancer | 184    | ICD9 | Malignant neoplasm of vagina                                        |
| Cancer | 184.1  | ICD9 | Malignant neoplasm of labia majora                                  |
| Cancer | 184.2  | ICD9 | Malignant neoplasm of labia minora                                  |
| Cancer | 184.3  | ICD9 | Malignant neoplasm of clitoris                                      |
| Cancer | 184.4  | ICD9 | Malignant neoplasm of vulva                                         |

|        |       |      |                                                                     |
|--------|-------|------|---------------------------------------------------------------------|
| Cancer | 185   | ICD9 | Malignant neoplasm of prostate                                      |
|        |       |      | Malignant neoplasm of penis and other male genital organs           |
| Cancer | 187   | ICD9 |                                                                     |
| Cancer | 190   | ICD9 | Malignant neoplasm of eye                                           |
| Cancer | 190   | ICD9 | Malignant neoplasm of eyeball                                       |
| Cancer | 190.1 | ICD9 | Malignant neoplasm of orbit                                         |
| Cancer | 190.2 | ICD9 | Malignant neoplasm of lacrimal gland                                |
| Cancer | 190.3 | ICD9 | Malignant neoplasm of conjunctiva                                   |
| Cancer | 190.4 | ICD9 | Malignant neoplasm of cornea                                        |
| Cancer | 190.5 | ICD9 | Malignant neoplasm of retina                                        |
| Cancer | 190.6 | ICD9 | Malignant neoplasm of choroid                                       |
| Cancer | 190.7 | ICD9 | Malignant neoplasm of lacrimal duct                                 |
|        |       |      | Malignant neoplasm of other specified sites of eye                  |
| Cancer | 190.8 | ICD9 |                                                                     |
| Cancer | 190.9 | ICD9 | Malignant neoplasm of eye                                           |
| Cancer | 191   | ICD9 | Malignant neoplasm of brain                                         |
| Cancer | 191   | ICD9 | Malignant neoplasm of cerebrum                                      |
| Cancer | 191.1 | ICD9 | Malignant neoplasm of frontal lobe                                  |
| Cancer | 191.2 | ICD9 | Malignant neoplasm of temporal lobe                                 |
| Cancer | 191.3 | ICD9 | Malignant neoplasm of parietal lobe                                 |
| Cancer | 191.4 | ICD9 | Malignant neoplasm of occipital lobe                                |
| Cancer | 191.5 | ICD9 | Malignant neoplasm of ventricles                                    |
| Cancer | 191.6 | ICD9 | Malignant neoplasm of cerebellum NOS                                |
| Cancer | 191.7 | ICD9 | Malignant neoplasm of brain stem                                    |
|        |       |      | Malignant neoplasm of other parts of brain                          |
| Cancer | 191.8 | ICD9 |                                                                     |
| Cancer | 191.9 | ICD9 | Malignant neoplasm of brain                                         |
|        |       |      | Malignant neoplasm of other and unspecified parts of nervous system |
| Cancer | 192   | ICD9 |                                                                     |
| Cancer | 192   | ICD9 | Malignant neoplasm of cranial nerves                                |
|        |       |      |                                                                     |
| Cancer | 192.1 | ICD9 | Malignant neoplasm of cerebral meninges                             |
| Cancer | 192.2 | ICD9 | Malignant neoplasm of spinal cord                                   |
| Cancer | 192.3 | ICD9 | Malignant neoplasm of spinal meninges                               |
|        |       |      | Malignant neoplasm of other specified sites of nervous system       |
| Cancer | 192.8 | ICD9 |                                                                     |
| Cancer | 192.9 | ICD9 | Malignant neoplasm of nervous system                                |
| Cancer | 193   | ICD9 | Malignant neoplasm of thyroid gland                                 |
|        |       |      | Malignant neoplasm of other endocrine glands and related structures |
| Cancer | 194   | ICD9 |                                                                     |



|        |        |      |                                                                                 |
|--------|--------|------|---------------------------------------------------------------------------------|
| Cancer | 194    | ICD9 | Malignant neoplasm of adrenal gland                                             |
| Cancer | 194.1  | ICD9 | Malignant neoplasm of parathyroid gland                                         |
| Cancer | 194.3  | ICD9 | Malignant neoplasm of pituitary gland and craniopharyngeal duct                 |
| Cancer | 194.4  | ICD9 | Malignant neoplasm of pineal gland                                              |
| Cancer | 194.5  | ICD9 | Malignant neoplasm of carotid body                                              |
| Cancer | 194.6  | ICD9 | Malignant neoplasm of aortic body and other paraganglia                         |
| Cancer | 194.8  | ICD9 | Malignant neoplasm of other endocrine glands and related structures             |
| Cancer | 194.9  | ICD9 | Malignant neoplasm of endocrine gland                                           |
| Cancer | 195.1  | ICD9 | Malignant neoplasm of thorax                                                    |
| Cancer | 202    | ICD9 | Other malignant neoplasms of lymphoid and histiocytic tissue                    |
| Cancer | 202.3  | ICD9 | Malignant histiocytosis                                                         |
| Cancer | 202.3  | ICD9 | Malignant histiocytosis                                                         |
| Cancer | 202.31 | ICD9 | Malignant histiocytosis involving lymph nodes of head                           |
| Cancer | 202.32 | ICD9 | Malignant histiocytosis involving intrathoracic lymph nodes                     |
| Cancer | 202.33 | ICD9 | Malignant histiocytosis involving intra-abdominal lymph nodes                   |
| Cancer | 202.34 | ICD9 | Malignant histiocytosis involving lymph nodes of axilla and upper limb          |
| Cancer | 202.35 | ICD9 | Malignant histiocytosis involving lymph nodes of inguinal region and lower limb |
| Cancer | 202.36 | ICD9 | Malignant histiocytosis involving intrapelvic lymph nodes                       |
| Cancer | 202.37 | ICD9 | Malignant histiocytosis involving spleen                                        |
| Cancer | 202.38 | ICD9 | Malignant histiocytosis involving lymph nodes of multiple sites                 |
| Cancer | 202.5  | ICD9 | Letterer-Siwe disease                                                           |
| Cancer | 202.5  | ICD9 | Letterer-Siwe disease                                                           |
| Cancer | 202.51 | ICD9 | Letterer-Siwe disease involving lymph nodes of head                             |
| Cancer | 202.52 | ICD9 | Letterer-Siwe disease involving intrathoracic lymph nodes                       |
| Cancer | 202.53 | ICD9 | Letterer-Siwe disease involving intra-abdominal lymph nodes                     |

|        |        |      |                                                                                    |
|--------|--------|------|------------------------------------------------------------------------------------|
| Cancer | 202.54 | ICD9 | Letterer-Siwe disease involving lymph nodes of axilla and upper limb               |
| Cancer | 202.55 | ICD9 | Letterer-Siwe disease involving lymph nodes of inguinal region and lower limb      |
| Cancer | 202.56 | ICD9 | Letterer-Siwe disease involving intrapelvic lymph nodes                            |
| Cancer | 202.57 | ICD9 | Letterer-Siwe disease involving spleen                                             |
| Cancer | 202.58 | ICD9 | Letterer-Siwe disease involving lymph nodes of multiple sites                      |
| Cancer | 202.6  | ICD9 | Malignant mast cell tumors                                                         |
| Cancer | 202.6  | ICD9 | Malignant mast cell tumors                                                         |
| Cancer | 202.61 | ICD9 | Malignant mast cell tumors involving lymph nodes of head                           |
| Cancer | 202.62 | ICD9 | Malignant mast cell tumors involving intrathoracic lymph nodes                     |
| Cancer | 202.63 | ICD9 | Malignant mast cell tumors involving intra-abdominal lymph nodes                   |
| Cancer | 202.64 | ICD9 | Malignant mast cell tumors involving lymph nodes of axilla and upper limb          |
| Cancer | 202.65 | ICD9 | Malignant mast cell tumors involving lymph nodes of inguinal region and lower limb |
| Cancer | 202.66 | ICD9 | Malignant mast cell tumors involving intrapelvic lymph nodes                       |
| Cancer | 202.67 | ICD9 | Malignant mast cell tumors involving spleen                                        |
| Cancer | 202.68 | ICD9 | Malignant mast cell tumors involving lymph nodes of multiple sites                 |
| Cancer | 209.1  | ICD9 | Malignant carcinoid tumors of the appendix                                         |
| Cancer | 209.1  | ICD9 | Malignant carcinoid tumor of the large intestine                                   |
| Cancer | 209.11 | ICD9 | Malignant carcinoid tumor of the appendix                                          |
| Cancer | 209.12 | ICD9 | Malignant carcinoid tumor of the cecum                                             |
| Cancer | 209.13 | ICD9 | Malignant carcinoid tumor of the ascending colon                                   |
| Cancer | 209.14 | ICD9 | Malignant carcinoid tumor of the transverse colon                                  |

|        |        |      |                                                           |
|--------|--------|------|-----------------------------------------------------------|
| Cancer | 209.15 | ICD9 | Malignant carcinoid tumor of the descending colon         |
| Cancer | 209.16 | ICD9 | Malignant carcinoid tumor of the sigmoid colon            |
| Cancer | 209.2  | ICD9 | Malignant carcinoid tumors of other and unspecified sites |
| Cancer | 209.2  | ICD9 | Malignant carcinoid tumor of unknown primary site         |
| Cancer | 209.21 | ICD9 | Malignant carcinoid tumor of the bronchus and lung        |
| Cancer | 209.22 | ICD9 | Malignant carcinoid tumor of the thymus                   |
| Cancer | 209.23 | ICD9 | Malignant carcinoid tumor of the stomach                  |
| Cancer | 209.24 | ICD9 | Malignant carcinoid tumor of the kidney                   |
| Cancer | 209.29 | ICD9 | Malignant carcinoid tumors of other sites                 |
| Cancer | 209.3  | ICD9 | Malignant poorly differentiated neuroendocrine tumors     |
| Cancer | 209.3  | ICD9 | Malignant poorly differentiated neuroendocrine carcinoma  |
| Cancer | 209.31 | ICD9 | Merkel cell carcinoma of the face (ADDED)                 |
| Cancer | 209.32 | ICD9 | Merkel cell carcinoma of the scalp & neck (ADDED)         |
| Cancer | 209.33 | ICD9 | Merkel cell carcinoma of the upper limb (ADDED)           |
| Cancer | 209.34 | ICD9 | Merkel cell carcinoma of the lower limb (ADDED)           |
| Cancer | 209.35 | ICD9 | Merkel cell carcinoma of the trunk (ADDED)                |
| Cancer | 209.36 | ICD9 | Merkel cell carcinoma of other sites (ADDED)              |
| Cancer | 209.7  | ICD9 | Secondary neuroendocrine tumor                            |
| Cancer | 209.75 | ICD9 | Merkel cell carcinoma                                     |
| Cancer | 230    | ICD9 | Carcinoma in situ of lip                                  |
| Cancer | 230.1  | ICD9 | Carcinoma in situ of esophagus                            |
| Cancer | 230.2  | ICD9 | Carcinoma in situ of stomach                              |
| Cancer | 230.3  | ICD9 | Carcinoma in situ of colon                                |
| Cancer | 230.8  | ICD9 | Carcinoma in situ of liver and biliary system             |

|        |        |      |                                                                               |
|--------|--------|------|-------------------------------------------------------------------------------|
| Cancer | 231    | ICD9 | Carcinoma in situ of respiratory system                                       |
| Cancer | 231    | ICD9 | Carcinoma in situ of larynx                                                   |
| Cancer | 231.1  | ICD9 | Carcinoma in situ of trachea                                                  |
| Cancer | 231.2  | ICD9 | Carcinoma in situ of bronchus and lung                                        |
| Cancer | 231.8  | ICD9 | Carcinoma in situ of other specified parts of respiratory system              |
| Cancer | 231.9  | ICD9 | Carcinoma in situ of respiratory system                                       |
| Cancer | 232    | ICD9 | Carcinoma in situ of skin                                                     |
| Cancer | 233    | ICD9 | Carcinoma in situ of breast and genitourinary system                          |
| Cancer | 233    | ICD9 | Carcinoma in situ of breast                                                   |
| Cancer | 233.3  | ICD9 | Carcinoma in situ of other and unspecified female genital organs              |
| Cancer | 233.3  | ICD9 | Carcinoma in situ of unspecified female genital organ                         |
| Cancer | 233.31 | ICD9 | Carcinoma in situ of vagina                                                   |
| Cancer | 233.32 | ICD9 | Carcinoma in situ of vulva                                                    |
| Cancer | 233.39 | ICD9 | Carcinoma in situ of other female genital organ                               |
| Cancer | 233.4  | ICD9 | Carcinoma in situ of prostate                                                 |
| Cancer | 233.5  | ICD9 | Carcinoma in situ of penis                                                    |
| Cancer | 233.6  | ICD9 | Carcinoma in situ of other and unspecified male genital organs                |
| Cancer | 233.7  | ICD9 | Carcinoma in situ of bladder                                                  |
| Cancer | 233.9  | ICD9 | Carcinoma in situ of other and unspecified urinary organs                     |
| Cancer | 234    | ICD9 | Carcinoma in situ of other and unspecified sites                              |
| Cancer | 234    | ICD9 | Carcinoma in situ of eye                                                      |
| Cancer | 234.8  | ICD9 | Carcinoma in situ of other specified sites                                    |
| Cancer | 234.9  | ICD9 | Carcinoma in situ                                                             |
| Cancer | 236    | ICD9 | Neoplasm of uncertain behavior of uterus                                      |
| Cancer | 236.1  | ICD9 | Neoplasm of uncertain behavior of placenta                                    |
| Cancer | 236.2  | ICD9 | Neoplasm of uncertain behavior of ovary                                       |
| Cancer | 236.3  | ICD9 | Neoplasm of uncertain behavior of other and unspecified female genital organs |
| Cancer | 236.7  | ICD9 | Neoplasm of uncertain behavior of bladder                                     |

|        |        |       |                                                                                      |
|--------|--------|-------|--------------------------------------------------------------------------------------|
| Cancer | 239.4  | ICD9  | Neoplasm of unspecified nature of bladder                                            |
| Cancer | 338.3  | ICD9  | Neoplasm related pain (acute) (chronic)                                              |
| Cancer | 795.82 | ICD9  | Elevated cancer antigen 125 [CA 125]                                                 |
| Cancer | V10.01 | ICD10 | Personal history of malignant neoplasm of tongue                                     |
| Cancer | V10.03 | ICD10 | Personal history of malignant neoplasm of esophagus                                  |
| Cancer | V10.04 | ICD10 | Personal history of malignant neoplasm of stomach                                    |
| Cancer | V10.05 | ICD10 | Personal history of malignant neoplasm of large intestine                            |
| Cancer | V10.1  | ICD10 | Personal history of malignant neoplasm of trachea                                    |
| Cancer | V10.11 | ICD10 | Personal history of malignant neoplasm of bronchus and lung                          |
| Cancer | V10.12 | ICD10 | Personal history of malignant neoplasm of trachea                                    |
| Cancer | V10.2  | ICD10 | Personal history of malignant neoplasm of other respiratory and intrathoracic organs |
| Cancer | V10.20 | ICD10 | Personal history of malignant neoplasm of unspecified respiratory organ              |
| Cancer | V10.21 | ICD10 | Personal history of malignant neoplasm of larynx                                     |
| Cancer | V10.22 | ICD10 | Personal history of malignant neoplasm of nasal cavities                             |
| Cancer | V10.29 | ICD10 | Personal history of malignant neoplasm of other respiratory and intrathoracic organs |
| Cancer | V10.41 | ICD10 | Personal history of malignant neoplasm of cervix uteri                               |
| Cancer | V10.46 | ICD10 | Personal history of malignant neoplasm of prostate                                   |
| Cancer | V10.48 | ICD10 | Personal history of malignant neoplasm of epididymis                                 |
| Cancer | V10.52 | ICD10 | Personal history of malignant neoplasm of kidney                                     |
| Cancer | V10.7  | ICD10 | Personal history of other lymphatic and hematopoietic neoplasms                      |

|        |        |       |                                                                                         |
|--------|--------|-------|-----------------------------------------------------------------------------------------|
| Cancer | V10.79 | ICD10 | Personal history of other lymphatic and hematopoietic neoplasms                         |
| Cancer | V10.81 | ICD10 | Personal history of malignant neoplasm of bone                                          |
| Cancer | V10.83 | ICD10 | Personal history of other malignant neoplasm of skin                                    |
| Cancer | V10.84 | ICD10 | Personal history of malignant neoplasm of eye                                           |
| Cancer | V10.85 | ICD10 | Personal history of malignant neoplasm of brain                                         |
| Cancer | V10.86 | ICD10 | Personal history of malignant neoplasm of other parts of nervous system                 |
| Cancer | V10.87 | ICD10 | Personal history of malignant neoplasm of thyroid                                       |
| Cancer | V10.88 | ICD10 | Personal history of malignant neoplasm of other endocrine glands and related structures |
| Cancer | C00    | ICD10 | Malignant neoplasm of lip                                                               |
| Cancer | C00.0  | ICD10 | Malignant neoplasm of external upper lip                                                |
| Cancer | C00.1  | ICD10 | Malignant neoplasm of external lower lip                                                |
| Cancer | C00.2  | ICD10 | Malignant neoplasm of external lip                                                      |
| Cancer | C00.3  | ICD10 | Malignant neoplasm of upper lip                                                         |
| Cancer | C00.4  | ICD10 | Malignant neoplasm of lower lip                                                         |
| Cancer | C00.5  | ICD10 | Malignant neoplasm of lip                                                               |
| Cancer | C00.6  | ICD10 | Malignant neoplasm of commissure of lip                                                 |
| Cancer | C00.8  | ICD10 | Malignant neoplasm of overlapping sites of lip                                          |
| Cancer | C00.9  | ICD10 | Malignant neoplasm of lip                                                               |
| Cancer | C01    | ICD10 | Malignant neoplasm of base of tongue                                                    |
| Cancer | C02    | ICD10 | Malignant neoplasm of other and unspecified parts of tongue                             |
| Cancer | C02.0  | ICD10 | Malignant neoplasm of dorsal surface of tongue                                          |
| Cancer | C02.1  | ICD10 | Malignant neoplasm of border of tongue                                                  |
| Cancer | C02.2  | ICD10 | Malignant neoplasm of ventral surface of tongue                                         |

|    |        |        |       |                                                                                 |
|----|--------|--------|-------|---------------------------------------------------------------------------------|
| 1  |        |        |       |                                                                                 |
| 2  |        |        |       |                                                                                 |
| 3  |        |        |       |                                                                                 |
| 4  | Cancer | C02.3  | ICD10 | Malignant neoplasm of anterior two-thirds of tongue                             |
| 5  | Cancer | C02.4  | ICD10 | Malignant neoplasm of lingual tonsil                                            |
| 6  |        |        |       |                                                                                 |
| 7  |        |        |       |                                                                                 |
| 8  | Cancer | C02.8  | ICD10 | Malignant neoplasm of overlapping sites of tongue                               |
| 9  |        |        |       |                                                                                 |
| 10 | Cancer | C02.9  | ICD10 | Malignant neoplasm of tongue                                                    |
| 11 | Cancer | C03    | ICD10 | Malignant neoplasm of gum                                                       |
| 12 |        |        |       |                                                                                 |
| 13 | Cancer | C03.0  | ICD10 | Malignant neoplasm of upper gum                                                 |
| 14 | Cancer | C03.1  | ICD10 | Malignant neoplasm of lower gum                                                 |
| 15 | Cancer | C03.9  | ICD10 | Malignant neoplasm of gum                                                       |
| 16 | Cancer | C04    | ICD10 | Malignant neoplasm of floor of mouth                                            |
| 17 |        |        |       |                                                                                 |
| 18 | Cancer | C04.0  | ICD10 | Malignant neoplasm of anterior floor of mouth                                   |
| 19 |        |        |       |                                                                                 |
| 20 |        |        |       |                                                                                 |
| 21 | Cancer | C04.1  | ICD10 | Malignant neoplasm of lateral floor of mouth                                    |
| 22 |        |        |       |                                                                                 |
| 23 |        |        |       |                                                                                 |
| 24 | Cancer | C04.8  | ICD10 | Malignant neoplasm of overlapping sites of floor of mouth                       |
| 25 |        |        |       |                                                                                 |
| 26 | Cancer | C04.9  | ICD10 | Malignant neoplasm of floor of mouth                                            |
| 27 | Cancer | C05    | ICD10 | Malignant neoplasm of palate                                                    |
| 28 |        |        |       |                                                                                 |
| 29 | Cancer | C05.0  | ICD10 | Malignant neoplasm of hard palate                                               |
| 30 | Cancer | C05.1  | ICD10 | Malignant neoplasm of soft palate                                               |
| 31 | Cancer | C05.2  | ICD10 | Malignant neoplasm of uvula                                                     |
| 32 |        |        |       |                                                                                 |
| 33 |        |        |       |                                                                                 |
| 34 | Cancer | C05.8  | ICD10 | Malignant neoplasm of overlapping sites of palate                               |
| 35 | Cancer | C05.9  | ICD10 | Malignant neoplasm of palate                                                    |
| 36 |        |        |       |                                                                                 |
| 37 | Cancer | C06    | ICD10 | Malignant neoplasm of other and unspecified parts of mouth                      |
| 38 |        |        |       |                                                                                 |
| 39 | Cancer | C06.0  | ICD10 | Malignant neoplasm of cheek mucosa                                              |
| 40 |        |        |       |                                                                                 |
| 41 | Cancer | C06.1  | ICD10 | Malignant neoplasm of vestibule of mouth                                        |
| 42 |        |        |       |                                                                                 |
| 43 | Cancer | C06.2  | ICD10 | Malignant neoplasm of retromolar area                                           |
| 44 |        |        |       |                                                                                 |
| 45 |        |        |       |                                                                                 |
| 46 | Cancer | C06.8  | ICD10 | Malignant neoplasm of overlapping sites of other and unspecified parts of mouth |
| 47 |        |        |       |                                                                                 |
| 48 |        |        |       |                                                                                 |
| 49 | Cancer | C06.80 | ICD10 | Malignant neoplasm of overlapping sites of unspecified parts of mouth           |
| 50 |        |        |       |                                                                                 |
| 51 | Cancer | C06.89 | ICD10 | Malignant neoplasm of overlapping sites of other parts of mouth                 |
| 52 |        |        |       |                                                                                 |
| 53 | Cancer | C06.9  | ICD10 | Malignant neoplasm of mouth                                                     |
| 54 | Cancer | C07    | ICD10 | Malignant neoplasm of parotid gland                                             |
| 55 |        |        |       |                                                                                 |
| 56 |        |        |       |                                                                                 |
| 57 |        |        |       |                                                                                 |
| 58 |        |        |       |                                                                                 |
| 59 |        |        |       |                                                                                 |
| 60 |        |        |       |                                                                                 |

|        |       |       |                                                                   |
|--------|-------|-------|-------------------------------------------------------------------|
| Cancer | C08   | ICD10 | Malignant neoplasm of other and unspecified major salivary glands |
| Cancer | C08.0 | ICD10 | Malignant neoplasm of submandibular gland                         |
| Cancer | C08.1 | ICD10 | Malignant neoplasm of sublingual gland                            |
| Cancer | C08.9 | ICD10 | Malignant neoplasm of major salivary gland                        |
| Cancer | C09   | ICD10 | Malignant neoplasm of tonsil                                      |
| Cancer | C09.0 | ICD10 | Malignant neoplasm of tonsillar fossa                             |
| Cancer | C09.1 | ICD10 | Malignant neoplasm of tonsillar pillar (anterior) (posterior)     |
| Cancer | C09.8 | ICD10 | Malignant neoplasm of overlapping sites of tonsil                 |
| Cancer | C09.9 | ICD10 | Malignant neoplasm of tonsil                                      |
| Cancer | C10   | ICD10 | Malignant neoplasm of oropharynx                                  |
| Cancer | C10.0 | ICD10 | Malignant neoplasm of vallecula                                   |
| Cancer | C10.1 | ICD10 | Malignant neoplasm of anterior surface of epiglottis              |
| Cancer | C10.2 | ICD10 | Malignant neoplasm of lateral wall of oropharynx                  |
| Cancer | C10.3 | ICD10 | Malignant neoplasm of posterior wall of oropharynx                |
| Cancer | C10.4 | ICD10 | Malignant neoplasm of branchial cleft                             |
| Cancer | C10.8 | ICD10 | Malignant neoplasm of overlapping sites of oropharynx             |
| Cancer | C10.9 | ICD10 | Malignant neoplasm of oropharynx                                  |
| Cancer | C11   | ICD10 | Malignant neoplasm of nasopharynx                                 |
| Cancer | C11.0 | ICD10 | Malignant neoplasm of superior wall of nasopharynx                |
| Cancer | C11.1 | ICD10 | Malignant neoplasm of posterior wall of nasopharynx               |
| Cancer | C11.2 | ICD10 | Malignant neoplasm of lateral wall of nasopharynx                 |
| Cancer | C11.3 | ICD10 | Malignant neoplasm of anterior wall of nasopharynx                |
| Cancer | C11.8 | ICD10 | Malignant neoplasm of overlapping sites of nasopharynx            |
| Cancer | C11.9 | ICD10 | Malignant neoplasm of nasopharynx                                 |
| Cancer | C12   | ICD10 | Malignant neoplasm of pyriform sinus                              |
| Cancer | C13   | ICD10 | Malignant neoplasm of hypopharynx                                 |



|        |       |       |                                                              |
|--------|-------|-------|--------------------------------------------------------------|
| Cancer | C13.0 | ICD10 | Malignant neoplasm of postcricoid region                     |
| Cancer | C13.1 | ICD10 | Malignant neoplasm of aryepiglottic fold                     |
| Cancer | C13.2 | ICD10 | Malignant neoplasm of posterior wall of hypopharynx          |
| Cancer | C13.8 | ICD10 | Malignant neoplasm of overlapping sites of hypopharynx       |
| Cancer | C13.9 | ICD10 | Malignant neoplasm of hypopharynx                            |
| Cancer | C14   | ICD10 | Malignant neoplasm of other and ill-defined sites in the lip |
| Cancer | C14.0 | ICD10 | Malignant neoplasm of pharynx                                |
| Cancer | C14.2 | ICD10 | Malignant neoplasm of Waldeyer's ring                        |
| Cancer | C14.8 | ICD10 | Malignant neoplasm of overlapping sites of lip               |
| Cancer | C15   | ICD10 | Malignant neoplasm of esophagus                              |
| Cancer | C15.3 | ICD10 | Malignant neoplasm of upper third of esophagus               |
| Cancer | C15.4 | ICD10 | Malignant neoplasm of middle third of esophagus              |
| Cancer | C15.5 | ICD10 | Malignant neoplasm of lower third of esophagus               |
| Cancer | C15.8 | ICD10 | Malignant neoplasm of overlapping sites of esophagus         |
| Cancer | C15.9 | ICD10 | Malignant neoplasm of esophagus                              |
| Cancer | C16   | ICD10 | Malignant neoplasm of stomach                                |
| Cancer | C16.0 | ICD10 | Malignant neoplasm of cardia                                 |
| Cancer | C16.1 | ICD10 | Malignant neoplasm of fundus of stomach                      |
| Cancer | C16.2 | ICD10 | Malignant neoplasm of body of stomach                        |
| Cancer | C16.3 | ICD10 | Malignant neoplasm of pyloric antrum                         |
| Cancer | C16.4 | ICD10 | Malignant neoplasm of pylorus                                |
| Cancer | C16.5 | ICD10 | Malignant neoplasm of lesser curvature of stomach            |
| Cancer | C16.6 | ICD10 | Malignant neoplasm of greater curvature of stomach           |
| Cancer | C16.8 | ICD10 | Malignant neoplasm of overlapping sites of stomach           |
| Cancer | C16.9 | ICD10 | Malignant neoplasm of stomach                                |
| Cancer | C18   | ICD10 | Malignant neoplasm of colon                                  |
| Cancer | C18.0 | ICD10 | Malignant neoplasm of cecum                                  |

|        |       |       |                                                              |
|--------|-------|-------|--------------------------------------------------------------|
| Cancer | C18.1 | ICD10 | Malignant neoplasm of appendix                               |
| Cancer | C18.2 | ICD10 | Malignant neoplasm of ascending colon                        |
| Cancer | C18.3 | ICD10 | Malignant neoplasm of hepatic flexure                        |
| Cancer | C18.4 | ICD10 | Malignant neoplasm of transverse colon                       |
| Cancer | C18.5 | ICD10 | Malignant neoplasm of splenic flexure                        |
| Cancer | C18.6 | ICD10 | Malignant neoplasm of descending colon                       |
| Cancer | C18.7 | ICD10 | Malignant neoplasm of sigmoid colon                          |
|        |       |       | Malignant neoplasm of overlapping sites of colon             |
| Cancer | C18.8 | ICD10 |                                                              |
| Cancer | C18.9 | ICD10 | Malignant neoplasm of colon                                  |
| Cancer | C21.2 | ICD10 | Malignant neoplasm of cloacogenic zone                       |
|        |       |       | Malignant neoplasm of overlapping sites of rectum            |
| Cancer | C21.8 | ICD10 |                                                              |
|        |       |       | Malignant neoplasm of liver and intrahepatic bile ducts      |
| Cancer | C22   | ICD10 |                                                              |
| Cancer | C22.1 | ICD10 | Intrahepatic bile duct carcinoma                             |
| Cancer | C22.9 | ICD10 | Malignant neoplasm of liver                                  |
| Cancer | C25   | ICD10 | Malignant neoplasm of pancreas                               |
| Cancer | C25.0 | ICD10 | Malignant neoplasm of head of pancreas                       |
| Cancer | C25.1 | ICD10 | Malignant neoplasm of body of pancreas                       |
| Cancer | C25.2 | ICD10 | Malignant neoplasm of tail of pancreas                       |
| Cancer | C25.3 | ICD10 | Malignant neoplasm of pancreatic duct                        |
|        |       |       | Malignant neoplasm of endocrine pancreas                     |
| Cancer | C25.4 | ICD10 |                                                              |
|        |       |       | Malignant neoplasm of other parts of pancreas                |
| Cancer | C25.7 | ICD10 |                                                              |
|        |       |       | Malignant neoplasm of overlapping sites of pancreas          |
| Cancer | C25.8 | ICD10 |                                                              |
| Cancer | C25.9 | ICD10 | Malignant neoplasm of pancreas                               |
| Cancer | C26.0 | ICD10 | Malignant neoplasm of intestinal tract                       |
| Cancer | C30.0 | ICD10 | Malignant neoplasm of nasal cavity                           |
| Cancer | C30.1 | ICD10 | Malignant neoplasm of middle ear                             |
|        |       |       |                                                              |
| Cancer | C31   | ICD10 | Malignant neoplasm of accessory sinuses                      |
| Cancer | C31.0 | ICD10 | Malignant neoplasm of maxillary sinus                        |
| Cancer | C31.1 | ICD10 | Malignant neoplasm of ethmoidal sinus                        |
| Cancer | C31.2 | ICD10 | Malignant neoplasm of frontal sinus                          |
| Cancer | C31.3 | ICD10 | Malignant neoplasm of sphenoid sinus                         |
|        |       |       | Malignant neoplasm of overlapping sites of accessory sinuses |
| Cancer | C31.8 | ICD10 |                                                              |

|        |        |       |                                                                          |
|--------|--------|-------|--------------------------------------------------------------------------|
| Cancer | C31.9  | ICD10 | Malignant neoplasm of accessory sinus                                    |
| Cancer | C32    | ICD10 | Malignant neoplasm of larynx                                             |
| Cancer | C32.0  | ICD10 | Malignant neoplasm of glottis                                            |
| Cancer | C32.1  | ICD10 | Malignant neoplasm of supraglottis                                       |
| Cancer | C32.2  | ICD10 | Malignant neoplasm of subglottis                                         |
| Cancer | C32.3  | ICD10 | Malignant neoplasm of laryngeal cartilage                                |
| Cancer | C32.8  | ICD10 | Malignant neoplasm of overlapping sites of larynx                        |
| Cancer | C32.9  | ICD10 | Malignant neoplasm of larynx                                             |
| Cancer | C33    | ICD10 | Malignant neoplasm of trachea                                            |
| Cancer | C34    | ICD10 | Malignant neoplasm of bronchus and lung                                  |
| Cancer | C34.0  | ICD10 | Malignant neoplasm of main bronchus                                      |
| Cancer | C34.00 | ICD10 | Malignant neoplasm of unspecified main bronchus                          |
| Cancer | C34.01 | ICD10 | Malignant neoplasm of right main bronchus                                |
| Cancer | C34.02 | ICD10 | Malignant neoplasm of left main bronchus                                 |
| Cancer | C34.1  | ICD10 | Malignant neoplasm of upper lobe                                         |
| Cancer | C34.10 | ICD10 | Malignant neoplasm of upper lobe                                         |
| Cancer | C34.11 | ICD10 | Malignant neoplasm of upper lobe                                         |
| Cancer | C34.12 | ICD10 | Malignant neoplasm of upper lobe                                         |
| Cancer | C34.2  | ICD10 | Malignant neoplasm of middle lobe                                        |
| Cancer | C34.3  | ICD10 | Malignant neoplasm of lower lobe                                         |
| Cancer | C34.30 | ICD10 | Malignant neoplasm of lower lobe                                         |
| Cancer | C34.31 | ICD10 | Malignant neoplasm of lower lobe                                         |
| Cancer | C34.32 | ICD10 | Malignant neoplasm of lower lobe                                         |
| Cancer | C34.8  | ICD10 | Malignant neoplasm of overlapping sites of bronchus and lung             |
| Cancer | C34.80 | ICD10 | Malignant neoplasm of overlapping sites of unspecified bronchus and lung |
| Cancer | C34.81 | ICD10 | Malignant neoplasm of overlapping sites of right bronchus and lung       |
| Cancer | C34.82 | ICD10 | Malignant neoplasm of overlapping sites of left bronchus and lung        |
| Cancer | C34.9  | ICD10 | Malignant neoplasm of unspecified part of bronchus or lung               |

|        |        |       |                                                                                                      |
|--------|--------|-------|------------------------------------------------------------------------------------------------------|
| Cancer | C34.90 | ICD10 | Malignant neoplasm of unspecified part of unspecified bronchus or lung                               |
| Cancer | C34.91 | ICD10 | Malignant neoplasm of unspecified part of right bronchus or lung                                     |
| Cancer | C34.92 | ICD10 | Malignant neoplasm of unspecified part of left bronchus or lung                                      |
| Cancer | C37    | ICD10 | Malignant neoplasm of thymus                                                                         |
| Cancer | C38.0  | ICD10 | Malignant neoplasm of heart                                                                          |
| Cancer | C38.1  | ICD10 | Malignant neoplasm of anterior mediastinum                                                           |
| Cancer | C38.2  | ICD10 | Malignant neoplasm of posterior mediastinum                                                          |
| Cancer | C38.3  | ICD10 | Malignant neoplasm of mediastinum                                                                    |
| Cancer | C38.4  | ICD10 | Malignant neoplasm of pleura                                                                         |
| Cancer | C38.8  | ICD10 | Malignant neoplasm of overlapping sites of heart                                                     |
| Cancer | C39    | ICD10 | Malignant neoplasm of other and ill-defined sites in the respiratory system and intrathoracic organs |
| Cancer | C39.0  | ICD10 | Malignant neoplasm of upper respiratory tract                                                        |
| Cancer | C39.9  | ICD10 | Malignant neoplasm of lower respiratory tract                                                        |
| Cancer | C40    | ICD10 | Malignant neoplasm of bone and articular cartilage of limbs                                          |
| Cancer | C40.0  | ICD10 | Malignant neoplasm of scapula and long bones of upper limb                                           |
| Cancer | C40.00 | ICD10 | Malignant neoplasm of scapula and long bones of unspecified upper limb                               |
| Cancer | C40.01 | ICD10 | Malignant neoplasm of scapula and long bones of right upper limb                                     |
| Cancer | C40.02 | ICD10 | Malignant neoplasm of scapula and long bones of left upper limb                                      |
| Cancer | C40.1  | ICD10 | Malignant neoplasm of short bones of upper limb                                                      |
| Cancer | C40.10 | ICD10 | Malignant neoplasm of short bones of unspecified upper limb                                          |
| Cancer | C40.11 | ICD10 | Malignant neoplasm of short bones of right upper limb                                                |

|        |        |       |                                                                                             |
|--------|--------|-------|---------------------------------------------------------------------------------------------|
| Cancer | C40.12 | ICD10 | Malignant neoplasm of short bones of left upper limb                                        |
| Cancer | C40.2  | ICD10 | Malignant neoplasm of long bones of lower limb                                              |
| Cancer | C40.20 | ICD10 | Malignant neoplasm of long bones of unspecified lower limb                                  |
| Cancer | C40.21 | ICD10 | Malignant neoplasm of long bones of right lower limb                                        |
| Cancer | C40.22 | ICD10 | Malignant neoplasm of long bones of left lower limb                                         |
| Cancer | C40.3  | ICD10 | Malignant neoplasm of short bones of lower limb                                             |
| Cancer | C40.30 | ICD10 | Malignant neoplasm of short bones of unspecified lower limb                                 |
| Cancer | C40.31 | ICD10 | Malignant neoplasm of short bones of right lower limb                                       |
| Cancer | C40.32 | ICD10 | Malignant neoplasm of short bones of left lower limb                                        |
| Cancer | C40.8  | ICD10 | Malignant neoplasm of overlapping sites of bone and articular cartilage of limb             |
| Cancer | C40.80 | ICD10 | Malignant neoplasm of overlapping sites of bone and articular cartilage of unspecified limb |
| Cancer | C40.81 | ICD10 | Malignant neoplasm of overlapping sites of bone and articular cartilage of right limb       |
| Cancer | C40.82 | ICD10 | Malignant neoplasm of overlapping sites of bone and articular cartilage of left limb        |
| Cancer | C40.9  | ICD10 | Malignant neoplasm of unspecified bones and articular cartilage of limb                     |
| Cancer | C40.90 | ICD10 | Malignant neoplasm of unspecified bones and articular cartilage of unspecified limb         |
| Cancer | C40.91 | ICD10 | Malignant neoplasm of unspecified bones and articular cartilage of right limb               |
| Cancer | C40.92 | ICD10 | Malignant neoplasm of unspecified bones and articular cartilage of left limb                |

|        |         |       |                                                                                   |
|--------|---------|-------|-----------------------------------------------------------------------------------|
| Cancer | C41     | ICD10 | Malignant neoplasm of bone and articular cartilage of other and unspecified sites |
| Cancer | C41.0   | ICD10 | Malignant neoplasm of bones of skull and face                                     |
| Cancer | C41.1   | ICD10 | Malignant neoplasm of mandible                                                    |
| Cancer | C41.2   | ICD10 | Malignant neoplasm of vertebral column                                            |
| Cancer | C41.3   | ICD10 | Malignant neoplasm of ribs                                                        |
| Cancer | C41.4   | ICD10 | Malignant neoplasm of pelvic bones                                                |
| Cancer | C41.9   | ICD10 | Malignant neoplasm of bone and articular cartilage                                |
| Cancer | C44.0   | ICD10 | Other and unspecified malignant neoplasm of skin of lip                           |
| Cancer | C44.00  | ICD10 | Unspecified malignant neoplasm of skin of lip                                     |
| Cancer | C44.09  | ICD10 | Other specified malignant neoplasm of skin of lip                                 |
| Cancer | C44.1   | ICD10 | Other and unspecified malignant neoplasm of skin of eyelid                        |
| Cancer | C44.10  | ICD10 | Unspecified malignant neoplasm of skin of eyelid                                  |
| Cancer | C44.101 | ICD10 | Unspecified malignant neoplasm of skin of unspecified eyelid                      |
| Cancer | C44.102 | ICD10 | Unspecified malignant neoplasm of skin of right eyelid                            |
| Cancer | C44.109 | ICD10 | Unspecified malignant neoplasm of skin of left eyelid                             |
| Cancer | C44.11  | ICD10 | Basal cell carcinoma of skin of eyelid                                            |
| Cancer | C44.12  | ICD10 | Squamous cell carcinoma of skin of eyelid                                         |
| Cancer | C44.19  | ICD10 | Other specified malignant neoplasm of skin of eyelid                              |
| Cancer | C44.191 | ICD10 | Other specified malignant neoplasm of skin of unspecified eyelid                  |
| Cancer | C44.192 | ICD10 | Other specified malignant neoplasm of skin of right eyelid                        |
| Cancer | C44.199 | ICD10 | Other specified malignant neoplasm of skin of left eyelid                         |

|    |        |         |       |                                             |
|----|--------|---------|-------|---------------------------------------------|
| 1  |        |         |       |                                             |
| 2  |        |         |       |                                             |
| 3  |        |         |       |                                             |
| 4  |        |         |       | Other and unspecified malignant             |
| 5  |        |         |       | neoplasm of skin of ear and external        |
| 6  | Cancer | C44.2   | ICD10 | auricular canal                             |
| 7  |        |         |       | Unspecified malignant neoplasm of skin      |
| 8  | Cancer | C44.20  | ICD10 | of ear and external auricular canal         |
| 9  |        |         |       | Unspecified malignant neoplasm of skin      |
| 10 |        |         |       | of unspecified ear and external auricular   |
| 11 | Cancer | C44.201 | ICD10 | canal                                       |
| 12 |        |         |       | Unspecified malignant neoplasm of skin      |
| 13 | Cancer | C44.202 | ICD10 | of right ear and external auricular canal   |
| 14 |        |         |       | Unspecified malignant neoplasm of skin      |
| 15 | Cancer | C44.209 | ICD10 | of left ear and external auricular canal    |
| 16 |        |         |       | Basal cell carcinoma of skin of ear and     |
| 17 | Cancer | C44.21  | ICD10 | external auricular canal                    |
| 18 |        |         |       | Squamous cell carcinoma of skin of ear      |
| 19 | Cancer | C44.22  | ICD10 | and external auricular canal                |
| 20 |        |         |       | Other specified malignant neoplasm of       |
| 21 | Cancer | C44.29  | ICD10 | skin of ear and external auricular canal    |
| 22 |        |         |       | Other specified malignant neoplasm of       |
| 23 | Cancer | C44.291 | ICD10 | skin of unspecified ear and external        |
| 24 |        |         |       | auricular canal                             |
| 25 | Cancer | C44.292 | ICD10 | Other specified malignant neoplasm of       |
| 26 |        |         |       | skin of right ear and external auricular    |
| 27 | Cancer | C44.299 | ICD10 | canal                                       |
| 28 |        |         |       | Other specified malignant neoplasm of       |
| 29 | Cancer | C44.299 | ICD10 | skin of left ear and external auricular     |
| 30 |        |         |       | canal                                       |
| 31 | Cancer | C44.30  | ICD10 | Unspecified malignant neoplasm of skin      |
| 32 |        |         |       | of other and unspecified parts of face      |
| 33 | Cancer | C44.300 | ICD10 | Unspecified malignant neoplasm of skin      |
| 34 |        |         |       | of unspecified part of face                 |
| 35 | Cancer | C44.301 | ICD10 | Unspecified malignant neoplasm of skin      |
| 36 |        |         |       | of nose                                     |
| 37 | Cancer | C44.309 | ICD10 | Unspecified malignant neoplasm of skin      |
| 38 |        |         |       | of other parts of face                      |
| 39 | Cancer | C44.31  | ICD10 | Basal cell carcinoma of skin of other and   |
| 40 |        |         |       | unspecified parts of face                   |
| 41 |        |         |       | Other specified malignant neoplasm of       |
| 42 | Cancer | C44.39  | ICD10 | skin of other and unspecified parts of face |
| 43 |        |         |       |                                             |
| 44 |        |         |       |                                             |
| 45 |        |         |       |                                             |
| 46 |        |         |       |                                             |
| 47 |        |         |       |                                             |
| 48 |        |         |       |                                             |
| 49 |        |         |       |                                             |
| 50 |        |         |       |                                             |
| 51 |        |         |       |                                             |
| 52 |        |         |       |                                             |
| 53 |        |         |       |                                             |
| 54 |        |         |       |                                             |
| 55 |        |         |       |                                             |
| 56 |        |         |       |                                             |
| 57 |        |         |       |                                             |
| 58 |        |         |       |                                             |
| 59 |        |         |       |                                             |
| 60 |        |         |       |                                             |

|        |         |       |                                                                         |
|--------|---------|-------|-------------------------------------------------------------------------|
| Cancer | C44.390 | ICD10 | Other specified malignant neoplasm of skin of unspecified parts of face |
| Cancer | C44.391 | ICD10 | Other specified malignant neoplasm of skin of nose                      |
| Cancer | C44.399 | ICD10 | Other specified malignant neoplasm of skin of other parts of face       |
| Cancer | C44.4   | ICD10 | Other and unspecified malignant neoplasm of skin of scalp and neck      |
| Cancer | C44.40  | ICD10 | Unspecified malignant neoplasm of skin of scalp and neck                |
| Cancer | C44.49  | ICD10 | Other specified malignant neoplasm of skin of scalp and neck            |
| Cancer | C44.500 | ICD10 | Unspecified malignant neoplasm of anal skin                             |
| Cancer | C44.501 | ICD10 | Unspecified malignant neoplasm of skin of breast                        |
| Cancer | C44.509 | ICD10 | Unspecified malignant neoplasm of skin of other part of trunk           |
| Cancer | C44.51  | ICD10 | Basal cell carcinoma of skin of trunk                                   |
| Cancer | C44.52  | ICD10 | Squamous cell carcinoma of skin of trunk                                |
| Cancer | C44.59  | ICD10 | Other specified malignant neoplasm of skin of trunk                     |
| Cancer | C44.590 | ICD10 | Other specified malignant neoplasm of anal skin                         |
| Cancer | C44.591 | ICD10 | Other specified malignant neoplasm of skin of breast                    |
| Cancer | C44.599 | ICD10 | Other specified malignant neoplasm of skin of other part of trunk       |
| Cancer | C44.6   | ICD10 | Other and unspecified malignant neoplasm of skin of upper limb          |
| Cancer | C44.60  | ICD10 | Unspecified malignant neoplasm of skin of upper limb                    |
| Cancer | C44.601 | ICD10 | Unspecified malignant neoplasm of skin of unspecified upper limb        |
| Cancer | C44.602 | ICD10 | Unspecified malignant neoplasm of skin of right upper limb              |
| Cancer | C44.609 | ICD10 | Unspecified malignant neoplasm of skin of left upper limb               |
| Cancer | C44.61  | ICD10 | Basal cell carcinoma of skin of upper limb                              |



|    |        |         |       |                                                                       |
|----|--------|---------|-------|-----------------------------------------------------------------------|
| 1  |        |         |       |                                                                       |
| 2  |        |         |       |                                                                       |
| 3  |        |         |       |                                                                       |
| 4  | Cancer | C44.62  | ICD10 | Squamous cell carcinoma of skin of upper limb                         |
| 5  |        |         |       |                                                                       |
| 6  | Cancer | C44.69  | ICD10 | Other specified malignant neoplasm of skin of upper limb              |
| 7  |        |         |       |                                                                       |
| 8  |        |         |       |                                                                       |
| 9  | Cancer | C44.691 | ICD10 | Other specified malignant neoplasm of skin of unspecified upper limb  |
| 10 |        |         |       |                                                                       |
| 11 |        |         |       |                                                                       |
| 12 | Cancer | C44.692 | ICD10 | Other specified malignant neoplasm of skin of right upper limb        |
| 13 |        |         |       |                                                                       |
| 14 |        |         |       |                                                                       |
| 15 | Cancer | C44.699 | ICD10 | Other specified malignant neoplasm of skin of left upper limb         |
| 16 |        |         |       |                                                                       |
| 17 | Cancer | C44.7   | ICD10 | Other and unspecified malignant neoplasm of skin of lower limb        |
| 18 |        |         |       |                                                                       |
| 19 |        |         |       |                                                                       |
| 20 | Cancer | C44.70  | ICD10 | Unspecified malignant neoplasm of skin of lower limb                  |
| 21 |        |         |       |                                                                       |
| 22 |        |         |       |                                                                       |
| 23 | Cancer | C44.701 | ICD10 | Unspecified malignant neoplasm of skin of unspecified lower limb      |
| 24 |        |         |       |                                                                       |
| 25 |        |         |       |                                                                       |
| 26 | Cancer | C44.702 | ICD10 | Unspecified malignant neoplasm of skin of right lower limb            |
| 27 |        |         |       |                                                                       |
| 28 |        |         |       |                                                                       |
| 29 | Cancer | C44.709 | ICD10 | Unspecified malignant neoplasm of skin of left lower limb             |
| 30 |        |         |       |                                                                       |
| 31 | Cancer | C44.71  | ICD10 | Basal cell carcinoma of skin of lower limb                            |
| 32 |        |         |       |                                                                       |
| 33 |        |         |       |                                                                       |
| 34 | Cancer | C44.72  | ICD10 | Squamous cell carcinoma of skin of lower limb                         |
| 35 |        |         |       |                                                                       |
| 36 |        |         |       |                                                                       |
| 37 | Cancer | C44.79  | ICD10 | Other specified malignant neoplasm of skin of lower limb              |
| 38 |        |         |       |                                                                       |
| 39 |        |         |       |                                                                       |
| 40 | Cancer | C44.791 | ICD10 | Other specified malignant neoplasm of skin of unspecified lower limb  |
| 41 |        |         |       |                                                                       |
| 42 | Cancer | C44.792 | ICD10 | Other specified malignant neoplasm of skin of right lower limb        |
| 43 |        |         |       |                                                                       |
| 44 |        |         |       |                                                                       |
| 45 | Cancer | C44.799 | ICD10 | Other specified malignant neoplasm of skin of left lower limb         |
| 46 |        |         |       |                                                                       |
| 47 | Cancer | C44.8   | ICD10 | Other and unspecified malignant neoplasm of overlapping sites of skin |
| 48 |        |         |       |                                                                       |
| 49 |        |         |       |                                                                       |
| 50 | Cancer | C44.80  | ICD10 | Unspecified malignant neoplasm of overlapping sites of skin           |
| 51 |        |         |       |                                                                       |
| 52 |        |         |       |                                                                       |
| 53 | Cancer | C44.89  | ICD10 | Other specified malignant neoplasm of overlapping sites of skin       |
| 54 |        |         |       |                                                                       |
| 55 |        |         |       |                                                                       |
| 56 | Cancer | C44.9   | ICD10 | Other and unspecified malignant neoplasm of skin                      |
| 57 |        |         |       |                                                                       |
| 58 |        |         |       |                                                                       |
| 59 |        |         |       |                                                                       |
| 60 |        |         |       |                                                                       |

|        |        |       |                                                                                           |
|--------|--------|-------|-------------------------------------------------------------------------------------------|
| Cancer | C44.90 | ICD10 | Unspecified malignant neoplasm of skin                                                    |
| Cancer | C44.99 | ICD10 | Other specified malignant neoplasm of skin                                                |
| Cancer | C45.0  | ICD10 | Mesothelioma of pleura                                                                    |
| Cancer | C45.2  | ICD10 | Mesothelioma of pericardium                                                               |
| Cancer | C47    | ICD10 | Malignant neoplasm of peripheral nerves and autonomic nervous system                      |
| Cancer | C47.0  | ICD10 | Malignant neoplasm of peripheral nerves of head                                           |
| Cancer | C47.1  | ICD10 | Malignant neoplasm of peripheral nerves of upper limb                                     |
| Cancer | C47.10 | ICD10 | Malignant neoplasm of peripheral nerves of unspecified upper limb                         |
| Cancer | C47.11 | ICD10 | Malignant neoplasm of peripheral nerves of right upper limb                               |
| Cancer | C47.12 | ICD10 | Malignant neoplasm of peripheral nerves of left upper limb                                |
| Cancer | C47.2  | ICD10 | Malignant neoplasm of peripheral nerves of lower limb                                     |
| Cancer | C47.20 | ICD10 | Malignant neoplasm of peripheral nerves of unspecified lower limb                         |
| Cancer | C47.21 | ICD10 | Malignant neoplasm of peripheral nerves of right lower limb                               |
| Cancer | C47.22 | ICD10 | Malignant neoplasm of peripheral nerves of left lower limb                                |
| Cancer | C47.3  | ICD10 | Malignant neoplasm of peripheral nerves of thorax                                         |
| Cancer | C47.4  | ICD10 | Malignant neoplasm of peripheral nerves of abdomen                                        |
| Cancer | C47.5  | ICD10 | Malignant neoplasm of peripheral nerves of pelvis                                         |
| Cancer | C47.6  | ICD10 | Malignant neoplasm of peripheral nerves of trunk                                          |
| Cancer | C47.8  | ICD10 | Malignant neoplasm of overlapping sites of peripheral nerves and autonomic nervous system |
| Cancer | C47.9  | ICD10 | Malignant neoplasm of peripheral nerves and autonomic nervous system                      |
| Cancer | C49.0  | ICD10 | Malignant neoplasm of other connective and soft tissue                                    |

|        |        |       |                                                                            |
|--------|--------|-------|----------------------------------------------------------------------------|
| Cancer | C49.0  | ICD10 | Malignant neoplasm of connective and soft tissue of head                   |
| Cancer | C49.1  | ICD10 | Malignant neoplasm of connective and soft tissue of upper limb             |
| Cancer | C49.10 | ICD10 | Malignant neoplasm of connective and soft tissue of unspecified upper limb |
| Cancer | C49.11 | ICD10 | Malignant neoplasm of connective and soft tissue of right upper limb       |
| Cancer | C49.12 | ICD10 | Malignant neoplasm of connective and soft tissue of left upper limb        |
| Cancer | C49.2  | ICD10 | Malignant neoplasm of connective and soft tissue of lower limb             |
| Cancer | C49.20 | ICD10 | Malignant neoplasm of connective and soft tissue of unspecified lower limb |
| Cancer | C49.21 | ICD10 | Malignant neoplasm of connective and soft tissue of right lower limb       |
| Cancer | C49.22 | ICD10 | Malignant neoplasm of connective and soft tissue of left lower limb        |
| Cancer | C49.3  | ICD10 | Malignant neoplasm of connective and soft tissue of thorax                 |
| Cancer | C49.4  | ICD10 | Malignant neoplasm of connective and soft tissue of abdomen                |
| Cancer | C49.5  | ICD10 | Malignant neoplasm of connective and soft tissue of pelvis                 |
| Cancer | C49.6  | ICD10 | Malignant neoplasm of connective and soft tissue of trunk                  |
| Cancer | C49.8  | ICD10 | Malignant neoplasm of overlapping sites of connective and soft tissue      |
| Cancer | C49.9  | ICD10 | Malignant neoplasm of connective and soft tissue                           |
| Cancer | C49.A  | ICD10 | Gastrointestinal stromal tumor                                             |
| Cancer | C49.A0 | ICD10 | Gastrointestinal stromal tumor                                             |
| Cancer | C49.A1 | ICD10 | Gastrointestinal stromal tumor of esophagus                                |
| Cancer | C49.A2 | ICD10 | Gastrointestinal stromal tumor of stomach                                  |
| Cancer | C49.A3 | ICD10 | Gastrointestinal stromal tumor of small intestine                          |
| Cancer | C49.A4 | ICD10 | Gastrointestinal stromal tumor of large intestine                          |

|        |        |       |                                                                       |
|--------|--------|-------|-----------------------------------------------------------------------|
| Cancer | C49.A5 | ICD10 | Gastrointestinal stromal tumor of rectum                              |
| Cancer | C49.A9 | ICD10 | Gastrointestinal stromal tumor of other sites                         |
| Cancer | C4A    | ICD10 | Merkel cell carcinoma                                                 |
| Cancer | C4A.0  | ICD10 | Merkel cell carcinoma of lip                                          |
| Cancer | C4A.1  | ICD10 | Merkel cell carcinoma of eyelid                                       |
| Cancer | C4A.10 | ICD10 | Merkel cell carcinoma of unspecified eyelid                           |
| Cancer | C4A.11 | ICD10 | Merkel cell carcinoma of right eyelid                                 |
| Cancer | C4A.12 | ICD10 | Merkel cell carcinoma of left eyelid                                  |
| Cancer | C4A.2  | ICD10 | Merkel cell carcinoma of ear and external auricular canal             |
| Cancer | C4A.20 | ICD10 | Merkel cell carcinoma of unspecified ear and external auricular canal |
| Cancer | C4A.21 | ICD10 | Merkel cell carcinoma of right ear and external auricular canal       |
| Cancer | C4A.22 | ICD10 | Merkel cell carcinoma of left ear and external auricular canal        |
| Cancer | C4A.3  | ICD10 | Merkel cell carcinoma of other and unspecified parts of face          |
| Cancer | C4A.30 | ICD10 | Merkel cell carcinoma of unspecified part of face                     |
| Cancer | C4A.31 | ICD10 | Merkel cell carcinoma of nose                                         |
| Cancer | C4A.39 | ICD10 | Merkel cell carcinoma of other parts of face                          |
| Cancer | C4A.4  | ICD10 | Merkel cell carcinoma of scalp and neck                               |
| Cancer | C4A.5  | ICD10 | Merkel cell carcinoma of trunk                                        |
| Cancer | C4A.51 | ICD10 | Merkel cell carcinoma of anal skin                                    |
| Cancer | C4A.52 | ICD10 | Merkel cell carcinoma of skin of breast                               |
| Cancer | C4A.59 | ICD10 | Merkel cell carcinoma of other part of trunk                          |
| Cancer | C4A.6  | ICD10 | Merkel cell carcinoma of upper limb                                   |
| Cancer | C4A.60 | ICD10 | Merkel cell carcinoma of unspecified upper limb                       |
| Cancer | C4A.61 | ICD10 | Merkel cell carcinoma of right upper limb                             |
| Cancer | C4A.62 | ICD10 | Merkel cell carcinoma of left upper limb                              |
| Cancer | C4A.7  | ICD10 | Merkel cell carcinoma of lower limb                                   |

|        |         |       |                                                                       |
|--------|---------|-------|-----------------------------------------------------------------------|
| Cancer | C4A.70  | ICD10 | Merkel cell carcinoma of unspecified lower limb                       |
| Cancer | C4A.71  | ICD10 | Merkel cell carcinoma of right lower limb                             |
| Cancer | C4A.72  | ICD10 | Merkel cell carcinoma of left lower limb                              |
| Cancer | C4A.8   | ICD10 | Merkel cell carcinoma of overlapping sites                            |
| Cancer | C4A.9   | ICD10 | Merkel cell carcinoma                                                 |
| Cancer | C50.02  | ICD10 | Malignant neoplasm of nipple and areola                               |
| Cancer | C50.021 | ICD10 | Malignant neoplasm of nipple and areola                               |
| Cancer | C50.022 | ICD10 | Malignant neoplasm of nipple and areola                               |
| Cancer | C50.029 | ICD10 | Malignant neoplasm of nipple and areola                               |
| Cancer | C50.12  | ICD10 | Malignant neoplasm of central portion of breast                       |
| Cancer | C50.121 | ICD10 | Malignant neoplasm of central portion of right male breast            |
| Cancer | C50.122 | ICD10 | Malignant neoplasm of central portion of left male breast             |
| Cancer | C50.129 | ICD10 | Malignant neoplasm of central portion of unspecified male breast      |
| Cancer | C50.22  | ICD10 | Malignant neoplasm of upper-inner quadrant of breast                  |
| Cancer | C50.221 | ICD10 | Malignant neoplasm of upper-inner quadrant of right male breast       |
| Cancer | C50.222 | ICD10 | Malignant neoplasm of upper-inner quadrant of left male breast        |
| Cancer | C50.229 | ICD10 | Malignant neoplasm of upper-inner quadrant of unspecified male breast |
| Cancer | C50.32  | ICD10 | Malignant neoplasm of lower-inner quadrant of breast                  |
| Cancer | C50.321 | ICD10 | Malignant neoplasm of lower-inner quadrant of right male breast       |
| Cancer | C50.322 | ICD10 | Malignant neoplasm of lower-inner quadrant of left male breast        |
| Cancer | C50.329 | ICD10 | Malignant neoplasm of lower-inner quadrant of unspecified male breast |
| Cancer | C50.42  | ICD10 | Malignant neoplasm of upper-outer quadrant of breast                  |
| Cancer | C50.421 | ICD10 | Malignant neoplasm of upper-outer quadrant of right male breast       |

|        |         |       |                                                                       |
|--------|---------|-------|-----------------------------------------------------------------------|
| Cancer | C50.422 | ICD10 | Malignant neoplasm of upper-outer quadrant of left male breast        |
| Cancer | C50.429 | ICD10 | Malignant neoplasm of upper-outer quadrant of unspecified male breast |
| Cancer | C50.52  | ICD10 | Malignant neoplasm of lower-outer quadrant of breast                  |
| Cancer | C50.521 | ICD10 | Malignant neoplasm of lower-outer quadrant of right male breast       |
| Cancer | C50.522 | ICD10 | Malignant neoplasm of lower-outer quadrant of left male breast        |
| Cancer | C50.529 | ICD10 | Malignant neoplasm of lower-outer quadrant of unspecified male breast |
| Cancer | C50.62  | ICD10 | Malignant neoplasm of axillary tail of breast                         |
| Cancer | C50.621 | ICD10 | Malignant neoplasm of axillary tail of right male breast              |
| Cancer | C50.622 | ICD10 | Malignant neoplasm of axillary tail of left male breast               |
| Cancer | C50.629 | ICD10 | Malignant neoplasm of axillary tail of unspecified male breast        |
| Cancer | C50.82  | ICD10 | Malignant neoplasm of overlapping sites of breast                     |
| Cancer | C50.821 | ICD10 | Malignant neoplasm of overlapping sites of right male breast          |
| Cancer | C50.822 | ICD10 | Malignant neoplasm of overlapping sites of left male breast           |
| Cancer | C50.829 | ICD10 | Malignant neoplasm of overlapping sites of unspecified male breast    |
| Cancer | C50.92  | ICD10 | Malignant neoplasm of breast of unspecified site                      |
| Cancer | C50.921 | ICD10 | Malignant neoplasm of unspecified site of right male breast           |
| Cancer | C50.922 | ICD10 | Malignant neoplasm of unspecified site of left male breast            |
| Cancer | C50.929 | ICD10 | Malignant neoplasm of unspecified site of unspecified male breast     |
| Cancer | C51     | ICD10 | Malignant neoplasm of vulva                                           |
| Cancer | C51.0   | ICD10 | Malignant neoplasm of labium majus                                    |
| Cancer | C51.1   | ICD10 | Malignant neoplasm of labium minus                                    |
| Cancer | C51.2   | ICD10 | Malignant neoplasm of clitoris                                        |

|        |        |       |                                                           |
|--------|--------|-------|-----------------------------------------------------------|
| Cancer | C51.9  | ICD10 | Malignant neoplasm of vulva                               |
| Cancer | C52    | ICD10 | Malignant neoplasm of vagina                              |
| Cancer | C53    | ICD10 | Malignant neoplasm of cervix uteri                        |
| Cancer | C53.0  | ICD10 | Malignant neoplasm of endocervix                          |
| Cancer | C53.1  | ICD10 | Malignant neoplasm of exocervix                           |
| Cancer | C53.8  | ICD10 | Malignant neoplasm of overlapping sites of cervix uteri   |
| Cancer | C53.9  | ICD10 | Malignant neoplasm of cervix uteri                        |
| Cancer | C61    | ICD10 | Malignant neoplasm of prostate                            |
| Cancer | C69    | ICD10 | Malignant neoplasm of eye and adnexa                      |
| Cancer | C69.0  | ICD10 | Malignant neoplasm of conjunctiva                         |
| Cancer | C69.00 | ICD10 | Malignant neoplasm of unspecified conjunctiva             |
| Cancer | C69.01 | ICD10 | Malignant neoplasm of right conjunctiva                   |
| Cancer | C69.02 | ICD10 | Malignant neoplasm of left conjunctiva                    |
| Cancer | C69.1  | ICD10 | Malignant neoplasm of cornea                              |
| Cancer | C69.10 | ICD10 | Malignant neoplasm of unspecified cornea                  |
| Cancer | C69.11 | ICD10 | Malignant neoplasm of right cornea                        |
| Cancer | C69.12 | ICD10 | Malignant neoplasm of left cornea                         |
| Cancer | C69.2  | ICD10 | Malignant neoplasm of retina                              |
| Cancer | C69.20 | ICD10 | Malignant neoplasm of unspecified retina                  |
| Cancer | C69.21 | ICD10 | Malignant neoplasm of right retina                        |
| Cancer | C69.22 | ICD10 | Malignant neoplasm of left retina                         |
| Cancer | C69.3  | ICD10 | Malignant neoplasm of choroid                             |
| Cancer | C69.30 | ICD10 | Malignant neoplasm of unspecified choroid                 |
| Cancer | C69.31 | ICD10 | Malignant neoplasm of right choroid                       |
| Cancer | C69.32 | ICD10 | Malignant neoplasm of left choroid                        |
| Cancer | C69.4  | ICD10 | Malignant neoplasm of ciliary body                        |
| Cancer | C69.40 | ICD10 | Malignant neoplasm of unspecified ciliary body            |
| Cancer | C69.41 | ICD10 | Malignant neoplasm of right ciliary body                  |
| Cancer | C69.42 | ICD10 | Malignant neoplasm of left ciliary body                   |
| Cancer | C69.5  | ICD10 | Malignant neoplasm of lacrimal gland and duct             |
| Cancer | C69.50 | ICD10 | Malignant neoplasm of unspecified lacrimal gland and duct |

|        |        |       |                                                                       |
|--------|--------|-------|-----------------------------------------------------------------------|
| Cancer | C69.51 | ICD10 | Malignant neoplasm of right lacrimal gland and duct                   |
| Cancer | C69.52 | ICD10 | Malignant neoplasm of left lacrimal gland and duct                    |
| Cancer | C69.6  | ICD10 | Malignant neoplasm of orbit                                           |
| Cancer | C69.60 | ICD10 | Malignant neoplasm of unspecified orbit                               |
| Cancer | C69.61 | ICD10 | Malignant neoplasm of right orbit                                     |
| Cancer | C69.62 | ICD10 | Malignant neoplasm of left orbit                                      |
| Cancer | C69.8  | ICD10 | Malignant neoplasm of overlapping sites of eye and adnexa             |
| Cancer | C69.80 | ICD10 | Malignant neoplasm of overlapping sites of unspecified eye and adnexa |
| Cancer | C69.81 | ICD10 | Malignant neoplasm of overlapping sites of right eye and adnexa       |
| Cancer | C69.82 | ICD10 | Malignant neoplasm of overlapping sites of left eye and adnexa        |
| Cancer | C69.9  | ICD10 | Malignant neoplasm of unspecified site of eye                         |
| Cancer | C69.90 | ICD10 | Malignant neoplasm of unspecified site of unspecified eye             |
| Cancer | C69.91 | ICD10 | Malignant neoplasm of unspecified site of right eye                   |
| Cancer | C69.92 | ICD10 | Malignant neoplasm of unspecified site of left eye                    |
| Cancer | C70    | ICD10 | Malignant neoplasm of meninges                                        |
| Cancer | C70.0  | ICD10 | Malignant neoplasm of cerebral meninges                               |
| Cancer | C70.1  | ICD10 | Malignant neoplasm of spinal meninges                                 |
| Cancer | C70.9  | ICD10 | Malignant neoplasm of meninges                                        |
| Cancer | C71    | ICD10 | Malignant neoplasm of brain                                           |
| Cancer | C71.0  | ICD10 | Malignant neoplasm of cerebrum                                        |
| Cancer | C71.1  | ICD10 | Malignant neoplasm of frontal lobe                                    |
| Cancer | C71.2  | ICD10 | Malignant neoplasm of temporal lobe                                   |
| Cancer | C71.3  | ICD10 | Malignant neoplasm of parietal lobe                                   |
| Cancer | C71.4  | ICD10 | Malignant neoplasm of occipital lobe                                  |
| Cancer | C71.5  | ICD10 | Malignant neoplasm of cerebral ventricle                              |
| Cancer | C71.6  | ICD10 | Malignant neoplasm of cerebellum                                      |
| Cancer | C71.7  | ICD10 | Malignant neoplasm of brain stem                                      |
| Cancer | C71.8  | ICD10 | Malignant neoplasm of overlapping sites of brain                      |



|        |        |       |                                                            |
|--------|--------|-------|------------------------------------------------------------|
| Cancer | C71.9  | ICD10 | Malignant neoplasm of brain                                |
| Cancer | C72    | ICD10 | Malignant neoplasm of spinal cord                          |
| Cancer | C72.0  | ICD10 | Malignant neoplasm of spinal cord                          |
| Cancer | C72.1  | ICD10 | Malignant neoplasm of cauda equina                         |
| Cancer | C72.2  | ICD10 | Malignant neoplasm of olfactory nerve                      |
| Cancer | C72.20 | ICD10 | Malignant neoplasm of unspecified olfactory nerve          |
| Cancer | C72.21 | ICD10 | Malignant neoplasm of right olfactory nerve                |
| Cancer | C72.22 | ICD10 | Malignant neoplasm of left olfactory nerve                 |
| Cancer | C72.3  | ICD10 | Malignant neoplasm of optic nerve                          |
| Cancer | C72.30 | ICD10 | Malignant neoplasm of unspecified optic nerve              |
| Cancer | C72.31 | ICD10 | Malignant neoplasm of right optic nerve                    |
| Cancer | C72.32 | ICD10 | Malignant neoplasm of left optic nerve                     |
| Cancer | C72.4  | ICD10 | Malignant neoplasm of acoustic nerve                       |
| Cancer | C72.40 | ICD10 | Malignant neoplasm of unspecified acoustic nerve           |
| Cancer | C72.41 | ICD10 | Malignant neoplasm of right acoustic nerve                 |
| Cancer | C72.42 | ICD10 | Malignant neoplasm of left acoustic nerve                  |
| Cancer | C72.5  | ICD10 | Malignant neoplasm of other and unspecified cranial nerves |
| Cancer | C72.50 | ICD10 | Malignant neoplasm of unspecified cranial nerve            |
| Cancer | C72.59 | ICD10 | Malignant neoplasm of other cranial nerves                 |
| Cancer | C72.9  | ICD10 | Malignant neoplasm of central nervous system               |
| Cancer | C73    | ICD10 | Malignant neoplasm of thyroid gland                        |
| Cancer | C74    | ICD10 | Malignant neoplasm of adrenal gland                        |
| Cancer | C74.0  | ICD10 | Malignant neoplasm of cortex of adrenal gland              |
| Cancer | C74.00 | ICD10 | Malignant neoplasm of cortex of unspecified adrenal gland  |
| Cancer | C74.01 | ICD10 | Malignant neoplasm of cortex of right adrenal gland        |

|        |         |       |                                                                     |
|--------|---------|-------|---------------------------------------------------------------------|
| Cancer | C74.02  | ICD10 | Malignant neoplasm of cortex of left adrenal gland                  |
| Cancer | C74.1   | ICD10 | Malignant neoplasm of medulla of adrenal gland                      |
| Cancer | C74.10  | ICD10 | Malignant neoplasm of medulla of unspecified adrenal gland          |
| Cancer | C74.11  | ICD10 | Malignant neoplasm of medulla of right adrenal gland                |
| Cancer | C74.12  | ICD10 | Malignant neoplasm of medulla of left adrenal gland                 |
| Cancer | C74.9   | ICD10 | Malignant neoplasm of unspecified part of adrenal gland             |
| Cancer | C74.90  | ICD10 | Malignant neoplasm of unspecified part of unspecified adrenal gland |
| Cancer | C74.91  | ICD10 | Malignant neoplasm of unspecified part of right adrenal gland       |
| Cancer | C74.92  | ICD10 | Malignant neoplasm of unspecified part of left adrenal gland        |
| Cancer | C75     | ICD10 | Malignant neoplasm of other endocrine glands and related structures |
| Cancer | C75.0   | ICD10 | Malignant neoplasm of parathyroid gland                             |
| Cancer | C75.1   | ICD10 | Malignant neoplasm of pituitary gland                               |
| Cancer | C75.2   | ICD10 | Malignant neoplasm of craniopharyngeal duct                         |
| Cancer | C75.3   | ICD10 | Malignant neoplasm of pineal gland                                  |
| Cancer | C75.4   | ICD10 | Malignant neoplasm of carotid body                                  |
| Cancer | C75.5   | ICD10 | Malignant neoplasm of aortic body and other paraganglia             |
| Cancer | C75.8   | ICD10 | Malignant neoplasm with pluriglandular involvement                  |
| Cancer | C75.9   | ICD10 | Malignant neoplasm of endocrine gland                               |
| Cancer | C76.1   | ICD10 | Malignant neoplasm of thorax                                        |
| Cancer | C7A.0   | ICD10 | Malignant carcinoid tumors                                          |
| Cancer | C7A.0   | ICD10 | Malignant carcinoid tumors                                          |
| Cancer | C7A.0   | ICD10 | Malignant carcinoid tumors                                          |
| Cancer | C7A.00  | ICD10 | Malignant carcinoid tumor of unspecified site                       |
| Cancer | C7A.020 | ICD10 | Malignant carcinoid tumor of the appendix                           |

|        |         |       |                                                                           |
|--------|---------|-------|---------------------------------------------------------------------------|
| Cancer | C7A.021 | ICD10 | Malignant carcinoid tumor of the cecum                                    |
| Cancer | C7A.022 | ICD10 | Malignant carcinoid tumor of the ascending colon                          |
| Cancer | C7A.023 | ICD10 | Malignant carcinoid tumor of the transverse colon                         |
| Cancer | C7A.024 | ICD10 | Malignant carcinoid tumor of the descending colon                         |
| Cancer | C7A.025 | ICD10 | Malignant carcinoid tumor of the sigmoid colon                            |
| Cancer | C7A.029 | ICD10 | Malignant carcinoid tumor of the large intestine                          |
| Cancer | C7A.090 | ICD10 | Malignant carcinoid tumor of the bronchus and lung                        |
| Cancer | C7A.091 | ICD10 | Malignant carcinoid tumor of the thymus                                   |
| Cancer | C7A.092 | ICD10 | Malignant carcinoid tumor of the stomach                                  |
| Cancer | C7A.093 | ICD10 | Malignant carcinoid tumor of the kidney                                   |
| Cancer | C7A.098 | ICD10 | Malignant carcinoid tumors of other sites                                 |
| Cancer | C7A.1   | ICD10 | Malignant poorly differentiated neuroendocrine tumors                     |
| Cancer | C7A.8   | ICD10 | Other malignant neuroendocrine tumors                                     |
| Cancer | C7B.00  | ICD10 | Secondary carcinoid tumors                                                |
| Cancer | C7B.1   | ICD10 | Secondary Merkel cell carcinoma                                           |
| Cancer | C96.0   | ICD10 | Multifocal and multisystemic (disseminated) Langerhans-cell histiocytosis |
| Cancer | C96.2   | ICD10 | Malignant mast cell neoplasm                                              |
| Cancer | C96.22  | ICD10 | Mast cell sarcoma                                                         |
| Cancer | C96.A   | ICD10 | Histiocytic sarcoma                                                       |
| Cancer | D00.0   | ICD10 | Carcinoma in situ of lip                                                  |
| Cancer | D00.00  | ICD10 | Carcinoma in situ of oral cavity                                          |
| Cancer | D00.01  | ICD10 | Carcinoma in situ of labial mucosa and vermilion border                   |
| Cancer | D00.02  | ICD10 | Carcinoma in situ of buccal mucosa                                        |
| Cancer | D00.03  | ICD10 | Carcinoma in situ of gingiva and edentulous alveolar ridge                |
| Cancer | D00.04  | ICD10 | Carcinoma in situ of soft palate                                          |
| Cancer | D00.05  | ICD10 | Carcinoma in situ of hard palate                                          |
| Cancer | D00.06  | ICD10 | Carcinoma in situ of floor of mouth                                       |

|        |        |       |                                                                 |
|--------|--------|-------|-----------------------------------------------------------------|
| Cancer | D00.07 | ICD10 | Carcinoma in situ of tongue                                     |
| Cancer | D00.08 | ICD10 | Carcinoma in situ of pharynx                                    |
| Cancer | D00.1  | ICD10 | Carcinoma in situ of esophagus                                  |
| Cancer | D00.2  | ICD10 | Carcinoma in situ of stomach                                    |
| Cancer | D01.0  | ICD10 | Carcinoma in situ of colon                                      |
| Cancer | D01.5  | ICD10 | Carcinoma in situ of liver                                      |
| Cancer | D02.0  | ICD10 | Carcinoma in situ of larynx                                     |
| Cancer | D02.1  | ICD10 | Carcinoma in situ of trachea                                    |
| Cancer | D02.2  | ICD10 | Carcinoma in situ of bronchus and lung                          |
| Cancer | D02.20 | ICD10 | Carcinoma in situ of unspecified bronchus and lung              |
| Cancer | D02.21 | ICD10 | Carcinoma in situ of right bronchus and lung                    |
| Cancer | D02.22 | ICD10 | Carcinoma in situ of left bronchus and lung                     |
| Cancer | D02.3  | ICD10 | Carcinoma in situ of other parts of respiratory system          |
| Cancer | D02.4  | ICD10 | Carcinoma in situ of respiratory system                         |
| Cancer | D05    | ICD10 | Carcinoma in situ of breast                                     |
| Cancer | D05.0  | ICD10 | Lobular carcinoma in situ of breast                             |
| Cancer | D05.00 | ICD10 | Lobular carcinoma in situ of unspecified breast                 |
| Cancer | D05.01 | ICD10 | Lobular carcinoma in situ of right breast                       |
| Cancer | D05.02 | ICD10 | Lobular carcinoma in situ of left breast                        |
| Cancer | D05.1  | ICD10 | Intraductal carcinoma in situ of breast                         |
| Cancer | D05.10 | ICD10 | Intraductal carcinoma in situ of unspecified breast             |
| Cancer | D05.11 | ICD10 | Intraductal carcinoma in situ of right breast                   |
| Cancer | D05.12 | ICD10 | Intraductal carcinoma in situ of left breast                    |
| Cancer | D05.8  | ICD10 | Other specified type of carcinoma in situ of breast             |
| Cancer | D05.80 | ICD10 | Other specified type of carcinoma in situ of unspecified breast |
| Cancer | D05.81 | ICD10 | Other specified type of carcinoma in situ of right breast       |
| Cancer | D05.82 | ICD10 | Other specified type of carcinoma in situ of left breast        |

|        |        |       |                                                                  |
|--------|--------|-------|------------------------------------------------------------------|
| Cancer | D05.9  | ICD10 | Unspecified type of carcinoma in situ of breast                  |
| Cancer | D05.90 | ICD10 | Unspecified type of carcinoma in situ of unspecified breast      |
| Cancer | D05.91 | ICD10 | Unspecified type of carcinoma in situ of right breast            |
| Cancer | D05.92 | ICD10 | Unspecified type of carcinoma in situ of left breast             |
| Cancer | D07.1  | ICD10 | Carcinoma in situ of vulva                                       |
| Cancer | D07.2  | ICD10 | Carcinoma in situ of vagina                                      |
| Cancer | D07.3  | ICD10 | Carcinoma in situ of other and unspecified female genital organs |
| Cancer | D07.30 | ICD10 | Carcinoma in situ of unspecified female genital organs           |
| Cancer | D07.39 | ICD10 | Carcinoma in situ of other female genital organs                 |
| Cancer | D07.4  | ICD10 | Carcinoma in situ of penis                                       |
| Cancer | D07.5  | ICD10 | Carcinoma in situ of prostate                                    |
| Cancer | D07.6  | ICD10 | Carcinoma in situ of other and unspecified male genital organs   |
| Cancer | D07.60 | ICD10 | Carcinoma in situ of unspecified male genital organs             |
| Cancer | D07.61 | ICD10 | Carcinoma in situ of scrotum                                     |
| Cancer | D07.69 | ICD10 | Carcinoma in situ of other male genital organs                   |
| Cancer | D09    | ICD10 | Carcinoma in situ of other and unspecified sites                 |
| Cancer | D09.0  | ICD10 | Carcinoma in situ of bladder                                     |
| Cancer | D09.1  | ICD10 | Carcinoma in situ of other and unspecified urinary organs        |
| Cancer | D09.10 | ICD10 | Carcinoma in situ of unspecified urinary organ                   |
| Cancer | D09.19 | ICD10 | Carcinoma in situ of other urinary organs                        |
| Cancer | D09.2  | ICD10 | Carcinoma in situ of eye                                         |
| Cancer | D09.20 | ICD10 | Carcinoma in situ of unspecified eye                             |
| Cancer | D09.21 | ICD10 | Carcinoma in situ of right eye                                   |
| Cancer | D09.22 | ICD10 | Carcinoma in situ of left eye                                    |
| Cancer | D09.3  | ICD10 | Carcinoma in situ of thyroid and other endocrine glands          |
| Cancer | D09.8  | ICD10 | Carcinoma in situ of other specified sites                       |

|        |         |       |                                                                         |
|--------|---------|-------|-------------------------------------------------------------------------|
| Cancer | D09.9   | ICD10 | Carcinoma in situ                                                       |
| Cancer | D39     | ICD10 | Neoplasm of uncertain behavior of female genital organs                 |
| Cancer | D39.0   | ICD10 | Neoplasm of uncertain behavior of uterus                                |
| Cancer | D39.1   | ICD10 | Neoplasm of uncertain behavior of ovary                                 |
| Cancer | D39.10  | ICD10 | Neoplasm of uncertain behavior of unspecified ovary                     |
| Cancer | D39.11  | ICD10 | Neoplasm of uncertain behavior of right ovary                           |
| Cancer | D39.12  | ICD10 | Neoplasm of uncertain behavior of left ovary                            |
| Cancer | D39.2   | ICD10 | Neoplasm of uncertain behavior of placenta                              |
| Cancer | D39.8   | ICD10 | Neoplasm of uncertain behavior of other specified female genital organs |
| Cancer | D39.9   | ICD10 | Neoplasm of uncertain behavior of female genital organ                  |
| Cancer | D41.4   | ICD10 | Neoplasm of uncertain behavior of bladder                               |
| Cancer | D49.4   | ICD10 | Neoplasm of unspecified behavior of bladder                             |
| Cancer | G89.3   | ICD10 | Neoplasm related pain (acute) (chronic)                                 |
| Cancer | M90.6   | ICD10 | Osteitis deformans in neoplastic diseases                               |
| Cancer | N90.3   | ICD10 | Dysplasia of vulva                                                      |
| Cancer | R97.1   | ICD10 | Elevated cancer antigen 125 [CA 125]                                    |
| Cancer | Z85.01  | ICD10 | Personal history of malignant neoplasm of esophagus                     |
| Cancer | Z85.02  | ICD10 | Personal history of malignant neoplasm of stomach                       |
| Cancer | Z85.020 | ICD10 | Personal history of malignant carcinoid tumor of stomach                |
| Cancer | Z85.028 | ICD10 | Personal history of other malignant neoplasm of stomach                 |
| Cancer | Z85.03  | ICD10 | Personal history of malignant neoplasm of large intestine               |
| Cancer | Z85.030 | ICD10 | Personal history of malignant carcinoid tumor of large intestine        |

|        |         |       |                                                                                      |
|--------|---------|-------|--------------------------------------------------------------------------------------|
| Cancer | Z85.038 | ICD10 | Personal history of other malignant neoplasm of large intestine                      |
| Cancer | Z85.07  | ICD10 | Personal history of malignant neoplasm of pancreas                                   |
| Cancer | Z85.1   | ICD10 | Personal history of malignant neoplasm of trachea                                    |
| Cancer | Z85.11  | ICD10 | Personal history of malignant neoplasm of bronchus and lung                          |
| Cancer | Z85.110 | ICD10 | Personal history of malignant carcinoid tumor of bronchus and lung                   |
| Cancer | Z85.118 | ICD10 | Personal history of other malignant neoplasm of bronchus and lung                    |
| Cancer | Z85.12  | ICD10 | Personal history of malignant neoplasm of trachea                                    |
| Cancer | Z85.2   | ICD10 | Personal history of malignant neoplasm of other respiratory and intrathoracic organs |
| Cancer | Z85.20  | ICD10 | Personal history of malignant neoplasm of unspecified respiratory organ              |
| Cancer | Z85.21  | ICD10 | Personal history of malignant neoplasm of larynx                                     |
| Cancer | Z85.22  | ICD10 | Personal history of malignant neoplasm of nasal cavities                             |
| Cancer | Z85.23  | ICD10 | Personal history of malignant neoplasm of thymus                                     |
| Cancer | Z85.230 | ICD10 | Personal history of malignant carcinoid tumor of thymus                              |
| Cancer | Z85.238 | ICD10 | Personal history of other malignant neoplasm of thymus                               |
| Cancer | Z85.29  | ICD10 | Personal history of malignant neoplasm of other respiratory and intrathoracic organs |
| Cancer | Z85.3   | ICD10 | Personal history of malignant neoplasm of breast                                     |
| Cancer | Z85.40  | ICD10 | Personal history of malignant neoplasm of unspecified female genital organ           |
| Cancer | Z85.41  | ICD10 | Personal history of malignant neoplasm of cervix uteri                               |
| Cancer | Z85.44  | ICD10 | Personal history of malignant neoplasm of other female genital organs                |

|        |         |       |                                                                           |
|--------|---------|-------|---------------------------------------------------------------------------|
| Cancer | Z85.45  | ICD10 | Personal history of malignant neoplasm of unspecified male genital organ  |
| Cancer | Z85.46  | ICD10 | Personal history of malignant neoplasm of prostate                        |
| Cancer | Z85.48  | ICD10 | Personal history of malignant neoplasm of epididymis                      |
| Cancer | Z85.49  | ICD10 | Personal history of malignant neoplasm of other male genital organs       |
| Cancer | Z85.5   | ICD10 | Personal history of malignant neoplasm of urinary tract                   |
| Cancer | Z85.50  | ICD10 | Personal history of malignant neoplasm of unspecified urinary tract organ |
| Cancer | Z85.54  | ICD10 | Personal history of malignant neoplasm of ureter                          |
| Cancer | Z85.59  | ICD10 | Personal history of malignant neoplasm of other urinary tract organ       |
| Cancer | Z85.7   | ICD10 | Personal history of other malignant neoplasms of lymphoid                 |
| Cancer | Z85.79  | ICD10 | Personal history of other malignant neoplasms of lymphoid                 |
| Cancer | Z85.81  | ICD10 | Personal history of malignant neoplasm of lip                             |
| Cancer | Z85.810 | ICD10 | Personal history of malignant neoplasm of tongue                          |
| Cancer | Z85.818 | ICD10 | Personal history of malignant neoplasm of other sites of lip              |
| Cancer | Z85.819 | ICD10 | Personal history of malignant neoplasm of unspecified site of lip         |
| Cancer | Z85.83  | ICD10 | Personal history of malignant neoplasm of bone and soft tissue            |
| Cancer | Z85.830 | ICD10 | Personal history of malignant neoplasm of bone                            |
| Cancer | Z85.831 | ICD10 | Personal history of malignant neoplasm of soft tissue                     |
| Cancer | Z85.840 | ICD10 | Personal history of malignant neoplasm of eye                             |
| Cancer | Z85.841 | ICD10 | Personal history of malignant neoplasm of brain                           |
| Cancer | Z85.848 | ICD10 | Personal history of malignant neoplasm of other parts of nervous tissue   |



|                        |         |       |                                                                                                    |
|------------------------|---------|-------|----------------------------------------------------------------------------------------------------|
| Cancer                 | Z85.850 | ICD10 | Personal history of malignant neoplasm of thyroid                                                  |
| Cancer                 | Z85.850 | ICD10 | Personal history of malignant neoplasm of thyroid                                                  |
| Cancer                 | Z85.858 | ICD10 | Personal history of malignant neoplasm of other endocrine glands                                   |
| Chronic kidney disease | 403     | ICD9  | Hypertensive chronic kidney disease                                                                |
| Chronic kidney disease | 403     | ICD9  | Hypertensive chronic kidney disease                                                                |
| Chronic kidney disease | 403     | ICD9  | Hypertensive chronic kidney disease                                                                |
| Chronic kidney disease | 403.01  | ICD9  | Hypertensive renal disease                                                                         |
| Chronic kidney disease | 403.1   | ICD9  | Hypertensive renal disease                                                                         |
| Chronic kidney disease | 403.1   | ICD9  | Hypertensive renal disease                                                                         |
| Chronic kidney disease | 403.11  | ICD9  | Hypertensive renal disease                                                                         |
| Chronic kidney disease | 403.9   | ICD9  | Hypertensive renal disease                                                                         |
| Chronic kidney disease | 403.9   | ICD9  | Hypertensive renal disease                                                                         |
| Chronic kidney disease | 403.91  | ICD9  | Hypertensive renal disease                                                                         |
| Chronic kidney disease | 585.1   | ICD9  | Chronic kidney disease                                                                             |
| Chronic kidney disease | 585.2   | ICD9  | Chronic kidney disease                                                                             |
| Chronic kidney disease | 585.3   | ICD9  | Chronic kidney disease                                                                             |
| Chronic kidney disease | 585.4   | ICD9  | Chronic kidney disease                                                                             |
| Chronic kidney disease | I12.0   | ICD10 | Hypertensive chronic kidney disease                                                                |
| Chronic kidney disease | I12.0   | ICD10 | Hypertensive chronic kidney disease with stage 5 chronic kidney disease or end stage renal disease |

|                                       |        |       |                                                                                         |
|---------------------------------------|--------|-------|-----------------------------------------------------------------------------------------|
| Chronic kidney disease                | I12.9  | ICD10 | Hypertensive chronic kidney disease with stage 1 through stage 4 chronic kidney disease |
| Chronic kidney disease                | N18.1  | ICD10 | Chronic kidney disease                                                                  |
| Chronic kidney disease                | N18.2  | ICD10 | Chronic kidney disease                                                                  |
| Chronic kidney disease                | N18.3  | ICD10 | Chronic kidney disease                                                                  |
| Chronic kidney disease                | N18.4  | ICD10 | Chronic kidney disease                                                                  |
| Chronic obstructive pulmonary disease | 491.2  | ICD9  | Obstructive chronic bronchitis                                                          |
| Chronic obstructive pulmonary disease | 491.2  | ICD9  | Obstructive chronic bronchitis                                                          |
| Chronic obstructive pulmonary disease | 491.21 | ICD9  | Obstructive chronic bronchitis with (acute) exacerbation                                |
| Chronic obstructive pulmonary disease | 491.22 | ICD9  | Obstructive chronic bronchitis with acute bronchitis                                    |
| Chronic obstructive pulmonary disease | 492    | ICD9  | Emphysema                                                                               |
| Chronic obstructive pulmonary disease | 492    | ICD9  | Emphysematous bleb                                                                      |
| Chronic obstructive pulmonary disease | 492.8  | ICD9  | Other emphysema                                                                         |
| Chronic obstructive pulmonary disease | 496    | ICD9  | Chronic airway obstruction                                                              |
| Chronic obstructive pulmonary disease | J44.0  | ICD10 | Other chronic obstructive pulmonary disease                                             |
| Chronic obstructive pulmonary disease | J44.0  | ICD10 | Chronic obstructive pulmonary disease with acute lower respiratory infection            |
| Chronic obstructive pulmonary disease | J44.1  | ICD10 | Chronic obstructive pulmonary disease with (acute) exacerbation                         |
| Chronic obstructive pulmonary disease | J42.0  | ICD10 | Unspecified chronic bronchitis                                                          |
| Chronic obstructive pulmonary disease | J41.0  | ICD10 | Simple and mucopurulent chronic bronchitis                                              |
| Chronic obstructive pulmonary disease | J41.0  | ICD10 | Simple chronic bronchitis                                                               |

|                                       |        |       |                                                                              |
|---------------------------------------|--------|-------|------------------------------------------------------------------------------|
| Chronic obstructive pulmonary disease | J41.1  | ICD10 | Mucopurulent chronic bronchitis                                              |
| Chronic obstructive pulmonary disease | J41.8  | ICD10 | Mixed simple and mucopurulent chronic bronchitis                             |
| Chronic obstructive pulmonary disease | J43.0  | ICD10 | Emphysema                                                                    |
| Chronic obstructive pulmonary disease | J43.0  | ICD10 | Unilateral pulmonary emphysema [MacLeod's syndrome]                          |
| Chronic obstructive pulmonary disease | J43.1  | ICD10 | Panlobular emphysema                                                         |
| Chronic obstructive pulmonary disease | J43.2  | ICD10 | Centrilobular emphysema                                                      |
| Chronic obstructive pulmonary disease | J43.8  | ICD10 | Other emphysema                                                              |
| Chronic obstructive pulmonary disease | J43.9  | ICD10 | Emphysema                                                                    |
| Chronic obstructive pulmonary disease | J44.0  | ICD10 | Other chronic obstructive pulmonary disease                                  |
| Chronic obstructive pulmonary disease | J44.0  | ICD10 | Chronic obstructive pulmonary disease with acute lower respiratory infection |
| Chronic obstructive pulmonary disease | J44.1  | ICD10 | Chronic obstructive pulmonary disease with (acute) exacerbation              |
| Chronic obstructive pulmonary disease | J44.9  | ICD10 | Chronic obstructive pulmonary disease                                        |
| Diabetes mellitus                     | 249    | ICD9  | Secondary diabetes mellitus                                                  |
| Diabetes mellitus                     | 249    | ICD9  | Secondary diabetes mellitus                                                  |
| Diabetes mellitus                     | 249    | ICD9  | Secondary diabetes mellitus                                                  |
| Diabetes mellitus                     | 249.01 | ICD9  | Secondary diabetes mellitus                                                  |
| Diabetes mellitus                     | 249.1  | ICD9  | Secondary diabetes mellitus with ketoacidosis                                |
| Diabetes mellitus                     | 249.1  | ICD9  | Secondary diabetes mellitus with ketoacidosis                                |
| Diabetes mellitus                     | 249.11 | ICD9  | Secondary diabetes mellitus with ketoacidosis                                |
| Diabetes mellitus                     | 249.2  | ICD9  | Secondary diabetes mellitus with hyperosmolarity                             |
| Diabetes mellitus                     | 249.2  | ICD9  | Secondary diabetes mellitus with hyperosmolarity                             |
| Diabetes mellitus                     | 249.21 | ICD9  | Secondary diabetes mellitus with hyperosmolarity                             |

|                   |        |      |                                                                   |
|-------------------|--------|------|-------------------------------------------------------------------|
| Diabetes mellitus | 249.3  | ICD9 | Secondary diabetes mellitus with other coma                       |
| Diabetes mellitus | 249.3  | ICD9 | Secondary diabetes mellitus with other coma                       |
| Diabetes mellitus | 249.31 | ICD9 | Secondary diabetes mellitus with other coma                       |
| Diabetes mellitus | 249.4  | ICD9 | Secondary diabetes mellitus with renal manifestations             |
| Diabetes mellitus | 249.4  | ICD9 | Secondary diabetes mellitus with renal manifestations             |
| Diabetes mellitus | 249.41 | ICD9 | Secondary diabetes mellitus with renal manifestations             |
| Diabetes mellitus | 249.5  | ICD9 | Secondary diabetes mellitus with ophthalmic manifestations        |
| Diabetes mellitus | 249.5  | ICD9 | Secondary diabetes mellitus with ophthalmic manifestations        |
| Diabetes mellitus | 249.51 | ICD9 | Secondary diabetes mellitus with ophthalmic manifestations        |
| Diabetes mellitus | 249.6  | ICD9 | Secondary diabetes mellitus with neurological manifestations      |
| Diabetes mellitus | 249.6  | ICD9 | Secondary diabetes mellitus with neurological manifestations      |
| Diabetes mellitus | 249.61 | ICD9 | Secondary diabetes mellitus with neurological manifestations      |
| Diabetes mellitus | 249.7  | ICD9 | Secondary diabetes mellitus with peripheral circulatory disorders |
| Diabetes mellitus | 249.7  | ICD9 | Secondary diabetes mellitus with peripheral circulatory disorders |
| Diabetes mellitus | 249.71 | ICD9 | Secondary diabetes mellitus with peripheral circulatory disorders |
| Diabetes mellitus | 249.8  | ICD9 | Secondary diabetes mellitus with other specified manifestations   |
| Diabetes mellitus | 249.8  | ICD9 | Secondary diabetes mellitus with other specified manifestations   |
| Diabetes mellitus | 249.81 | ICD9 | Secondary diabetes mellitus with other specified manifestations   |
| Diabetes mellitus | 249.9  | ICD9 | Secondary diabetes mellitus with unspecified complication         |
| Diabetes mellitus | 249.9  | ICD9 | Secondary diabetes mellitus with unspecified complication         |

|    |                   |        |      |                                                                                                                                 |
|----|-------------------|--------|------|---------------------------------------------------------------------------------------------------------------------------------|
| 1  |                   |        |      |                                                                                                                                 |
| 2  |                   |        |      |                                                                                                                                 |
| 3  |                   |        |      |                                                                                                                                 |
| 4  | Diabetes mellitus | 249.91 | ICD9 | Secondary diabetes mellitus with unspecified complication                                                                       |
| 5  | Diabetes mellitus | 250    | ICD9 | Diabetes mellitus                                                                                                               |
| 6  |                   |        |      |                                                                                                                                 |
| 7  | Diabetes mellitus | 250    | ICD9 | Diabetes mellitus without mention of complication                                                                               |
| 8  |                   |        |      |                                                                                                                                 |
| 9  | Diabetes mellitus | 250    | ICD9 | Diabetes mellitus without mention of complication                                                                               |
| 10 |                   |        |      |                                                                                                                                 |
| 11 | Diabetes mellitus | 250    | ICD9 | type II diabetes mellitus [non-insulin dependent type] [NIDDM type] [adult-onset type] or unspecified type                      |
| 12 |                   |        |      |                                                                                                                                 |
| 13 | Diabetes mellitus | 250.01 | ICD9 | type I diabetes mellitus [insulin dependent type] [IDDM] [juvenile type]                                                        |
| 14 |                   |        |      |                                                                                                                                 |
| 15 | Diabetes mellitus | 250.01 | ICD9 | type I diabetes mellitus [insulin dependent type] [IDDM] [juvenile type]                                                        |
| 16 |                   |        |      |                                                                                                                                 |
| 17 | Diabetes mellitus | 250.02 | ICD9 | type II diabetes mellitus [non-insulin dependent type] [NIDDM type] [adult-onset type] or unspecified type                      |
| 18 |                   |        |      |                                                                                                                                 |
| 19 | Diabetes mellitus | 250.03 | ICD9 | type I diabetes mellitus [juvenile type]                                                                                        |
| 20 |                   |        |      |                                                                                                                                 |
| 21 | Diabetes mellitus | 250.03 | ICD9 | type I diabetes mellitus [juvenile type]                                                                                        |
| 22 |                   |        |      |                                                                                                                                 |
| 23 | Diabetes mellitus | 250.1  | ICD9 | Diabetes with ketoacidosis                                                                                                      |
| 24 |                   |        |      |                                                                                                                                 |
| 25 | Diabetes mellitus | 250.1  | ICD9 | type II diabetes mellitus [non-insulin dependent type] [NIDDM type] [adult-onset type] or unspecified type                      |
| 26 |                   |        |      |                                                                                                                                 |
| 27 | Diabetes mellitus | 250.11 | ICD9 | type I diabetes mellitus [insulin dependent type] [IDDM] [juvenile type]                                                        |
| 28 |                   |        |      |                                                                                                                                 |
| 29 | Diabetes mellitus | 250.11 | ICD9 | type I diabetes mellitus [insulin dependent type] [IDDM] [juvenile type]                                                        |
| 30 |                   |        |      |                                                                                                                                 |
| 31 | Diabetes mellitus | 250.12 | ICD9 | type II diabetes mellitus [non-insulin dependent type] [NIDDM type] [adult-onset type] or unspecified type                      |
| 32 |                   |        |      |                                                                                                                                 |
| 33 | Diabetes mellitus | 250.13 | ICD9 | type I diabetes mellitus [juvenile type]                                                                                        |
| 34 |                   |        |      |                                                                                                                                 |
| 35 | Diabetes mellitus | 250.2  | ICD9 | Diabetes mellitus with hyperosmolarity                                                                                          |
| 36 |                   |        |      |                                                                                                                                 |
| 37 | Diabetes mellitus | 250.2  | ICD9 | Diabetes mellitus                                                                                                               |
| 38 |                   |        |      |                                                                                                                                 |
| 39 | Diabetes mellitus | 250.21 | ICD9 | Diabetes mellitus                                                                                                               |
| 40 |                   |        |      |                                                                                                                                 |
| 41 | Diabetes mellitus | 250.22 | ICD9 | Diabetes mellitus type II [non-insulin dependent type] [NIDDM type] [adult-onset type] or unspecified type with hyperosmolarity |
| 42 |                   |        |      |                                                                                                                                 |
| 43 | Diabetes mellitus | 250.22 | ICD9 | Diabetes mellitus type II [non-insulin dependent type] [NIDDM type] [adult-onset type] or unspecified type with hyperosmolarity |
| 44 |                   |        |      |                                                                                                                                 |
| 45 | Diabetes mellitus | 250.23 | ICD9 | Diabetes mellitus                                                                                                               |
| 46 |                   |        |      |                                                                                                                                 |
| 47 | Diabetes mellitus | 250.3  | ICD9 | Diabetes with other coma                                                                                                        |
| 48 |                   |        |      |                                                                                                                                 |
| 49 | Diabetes mellitus | 250.3  | ICD9 | Diabetes mellitus                                                                                                               |
| 50 |                   |        |      |                                                                                                                                 |
| 51 | Diabetes mellitus | 250.31 | ICD9 | Diabetes mellitus                                                                                                               |
| 52 |                   |        |      |                                                                                                                                 |
| 53 | Diabetes mellitus | 250.32 | ICD9 | Diabetes mellitus with other coma                                                                                               |
| 54 |                   |        |      |                                                                                                                                 |
| 55 | Diabetes mellitus | 250.33 | ICD9 | Diabetes mellitus with other coma                                                                                               |
| 56 |                   |        |      |                                                                                                                                 |
| 57 | Diabetes mellitus | 250.4  | ICD9 | Diabetes with renal manifestations                                                                                              |
| 58 |                   |        |      |                                                                                                                                 |
| 59 |                   |        |      |                                                                                                                                 |
| 60 |                   |        |      |                                                                                                                                 |

|                   |        |      |                                                                                                            |
|-------------------|--------|------|------------------------------------------------------------------------------------------------------------|
| Diabetes mellitus | 250.4  | ICD9 | Diabetes mellitus type II [non-insulin dependent type] [NIDDM type] [adult-onset type] or unspecified type |
| Diabetes mellitus | 250.41 | ICD9 | Diabetes mellitus type I [insulin dependent type] [IDDM] [juvenile type]                                   |
| Diabetes mellitus | 250.42 | ICD9 | Diabetes mellitus type II [non-insulin dependent type] [NIDDM type] [adult-onset type] or unspecified type |
| Diabetes mellitus | 250.43 | ICD9 | Diabetes mellitus type I [juvenile type]                                                                   |
| Diabetes mellitus | 250.5  | ICD9 | Diabetes with ophthalmic manifestations                                                                    |
| Diabetes mellitus | 250.5  | ICD9 | Diabetes mellitus type II [non-insulin dependent type] [NIDDM type] [adult-onset type] or unspecified type |
| Diabetes mellitus | 250.51 | ICD9 | Diabetes mellitus type I [insulin dependent type] [IDDM] [juvenile type]                                   |
| Diabetes mellitus | 250.52 | ICD9 | Diabetes mellitus type II [non-insulin dependent type] [NIDDM type] [adult-onset type] or unspecified type |
| Diabetes mellitus | 250.53 | ICD9 | Diabetes mellitus type I [juvenile type]                                                                   |
| Diabetes mellitus | 250.6  | ICD9 | Diabetes with neurological manifestations                                                                  |
| Diabetes mellitus | 250.6  | ICD9 | Diabetes mellitus type II [non-insulin dependent type] [NIDDM type] [adult-onset type] or unspecified type |
| Diabetes mellitus | 250.61 | ICD9 | Diabetes mellitus type I [insulin dependent type] [IDDM] [juvenile type]                                   |
| Diabetes mellitus | 250.62 | ICD9 | Diabetes mellitus type II [non-insulin dependent type] [NIDDM type] [adult-onset type] or unspecified type |
| Diabetes mellitus | 250.63 | ICD9 | Diabetes mellitus type I [juvenile type]                                                                   |
| Diabetes mellitus | 250.7  | ICD9 | Diabetes with peripheral circulatory disorders                                                             |
| Diabetes mellitus | 250.7  | ICD9 | Diabetes mellitus type II [non-insulin dependent type] [NIDDM type] [adult-onset type] or unspecified type |
| Diabetes mellitus | 250.71 | ICD9 | Diabetes mellitus type I [insulin dependent type] [IDDM] [juvenile type]                                   |

|                   |        |       |                                                                                                                               |
|-------------------|--------|-------|-------------------------------------------------------------------------------------------------------------------------------|
| Diabetes mellitus | 250.72 | ICD9  | Diabetes mellitus type II [non-insulin dependent type] [NIDDM type] [adult-onset type] or unspecified type                    |
| Diabetes mellitus | 250.73 | ICD9  | Diabetes mellitus type I [juvenile type]                                                                                      |
| Diabetes mellitus | 250.8  | ICD9  | Diabetes with other specified manifestations                                                                                  |
| Diabetes mellitus | 250.8  | ICD9  | Diabetes mellitus type II [non-insulin dependent type] [NIDDM type] [adult-onset type] or unspecified type                    |
| Diabetes mellitus | 250.81 | ICD9  | Diabetes mellitus type I [insulin dependent type] [IDDM] [juvenile type]                                                      |
| Diabetes mellitus | 250.82 | ICD9  | Diabetes mellitus type II [non-insulin dependent type] [NIDDM type] [adult-onset type] or unspecified type                    |
| Diabetes mellitus | 250.83 | ICD9  | Diabetes mellitus type I [juvenile type]                                                                                      |
| Diabetes mellitus | 250.9  | ICD9  | Diabetes with unspecified complication                                                                                        |
| Diabetes mellitus | 250.9  | ICD9  | Diabetes mellitus type II [non-insulin dependent type] [NIDDM type] [adult-onset type] or unspecified type                    |
| Diabetes mellitus | 250.91 | ICD9  | Diabetes mellitus type I [insulin dependent type] [IDDM] [juvenile type]                                                      |
| Diabetes mellitus | 250.92 | ICD9  | Diabetes mellitus type II [non-insulin dependent type] [NIDDM type] [adult-onset type] or unspecified type                    |
| Diabetes mellitus | 250.93 | ICD9  | Diabetes mellitus type I [insulin dependent type] [IDDM] [juvenile type]                                                      |
| Diabetes mellitus | 357.2  | ICD9  | Polyneuropathy in diabetes                                                                                                    |
| Diabetes mellitus | E08    | ICD10 | Diabetes mellitus due to underlying condition                                                                                 |
| Diabetes mellitus | E08.0  | ICD10 | Diabetes mellitus due to underlying condition with hyperosmolarity                                                            |
| Diabetes mellitus | E08.00 | ICD10 | Diabetes mellitus due to underlying condition with hyperosmolarity without nonketotic hyperglycemic-hyperosmolar coma (NKHHC) |
| Diabetes mellitus | E08.01 | ICD10 | Diabetes mellitus due to underlying condition with hyperosmolarity with coma                                                  |
| Diabetes mellitus | E08.1  | ICD10 | Diabetes mellitus due to underlying condition with ketoacidosis                                                               |

|                   |          |       |                                                                                                                  |
|-------------------|----------|-------|------------------------------------------------------------------------------------------------------------------|
| Diabetes mellitus | E08.10   | ICD10 | Diabetes mellitus due to underlying condition with ketoacidosis without coma                                     |
| Diabetes mellitus | E08.11   | ICD10 | Diabetes mellitus due to underlying condition with ketoacidosis with coma                                        |
| Diabetes mellitus | E08.2    | ICD10 | Diabetes mellitus due to underlying condition with kidney complications                                          |
| Diabetes mellitus | E08.21   | ICD10 | Diabetes mellitus due to underlying condition with diabetic nephropathy                                          |
| Diabetes mellitus | E08.22   | ICD10 | Diabetes mellitus due to underlying condition with diabetic chronic kidney disease                               |
| Diabetes mellitus | E08.29   | ICD10 | Diabetes mellitus due to underlying condition with other diabetic kidney complication                            |
| Diabetes mellitus | E08.3    | ICD10 | Diabetes mellitus due to underlying condition with ophthalmic complications                                      |
| Diabetes mellitus | E08.31   | ICD10 | Diabetes mellitus due to underlying condition with unspecified diabetic retinopathy                              |
| Diabetes mellitus | E08.311  | ICD10 | Diabetes mellitus due to underlying condition with unspecified diabetic retinopathy with macular edema           |
| Diabetes mellitus | E08.319  | ICD10 | Diabetes mellitus due to underlying condition with unspecified diabetic retinopathy without macular edema        |
| Diabetes mellitus | E08.32   | ICD10 | Diabetes mellitus due to underlying condition with mild nonproliferative diabetic retinopathy                    |
| Diabetes mellitus | E08.321  | ICD10 | Diabetes mellitus due to underlying condition with mild nonproliferative diabetic retinopathy with macular edema |
| Diabetes mellitus | E08.3211 | ICD10 | Diabetes with mild nonp rtnop with macular edema                                                                 |
| Diabetes mellitus | E08.3212 | ICD10 | Diabetes with mild nonp rtnop with macular edema                                                                 |
| Diabetes mellitus | E08.3213 | ICD10 | Diabetes with mild nonp rtnop with macular edema                                                                 |



|                   |          |       |                                                                                                                         |
|-------------------|----------|-------|-------------------------------------------------------------------------------------------------------------------------|
| Diabetes mellitus | E08.3219 | ICD10 | Diabetes with mild nonp rtnop with macular edema                                                                        |
| Diabetes mellitus | E08.329  | ICD10 | Diabetes mellitus due to underlying condition with mild nonproliferative diabetic retinopathy without macular edema     |
| Diabetes mellitus | E08.3291 | ICD10 | Diabetes with mild nonp rtnop without macular edema                                                                     |
| Diabetes mellitus | E08.3292 | ICD10 | Diabetes mellitus due to underlying condition with mild nonproliferative diabetic retinopathy without macular edema     |
| Diabetes mellitus | E08.3293 | ICD10 | Diabetes with mild nonp rtnop without macular edema                                                                     |
| Diabetes mellitus | E08.3299 | ICD10 | Diabetes with mild nonp rtnop without macular edema                                                                     |
| Diabetes mellitus | E08.33   | ICD10 | Diabetes mellitus due to underlying condition with moderate nonproliferative diabetic retinopathy                       |
| Diabetes mellitus | E08.331  | ICD10 | Diabetes mellitus due to underlying condition with moderate nonproliferative diabetic retinopathy with macular edema    |
| Diabetes mellitus | E08.3311 | ICD10 | Diabetes with moderate nonp rtnop with macular edema                                                                    |
| Diabetes mellitus | E08.3312 | ICD10 | Diabetes mellitus due to underlying condition with moderate nonproliferative diabetic retinopathy with macular edema    |
| Diabetes mellitus | E08.3313 | ICD10 | Diabetes with moderate nonp rtnop with macular edema                                                                    |
| Diabetes mellitus | E08.3319 | ICD10 | Diabetes with moderate nonp rtnop with macular edema                                                                    |
| Diabetes mellitus | E08.339  | ICD10 | Diabetes mellitus due to underlying condition with moderate nonproliferative diabetic retinopathy without macular edema |

|                   |          |       |                                                                                                                         |
|-------------------|----------|-------|-------------------------------------------------------------------------------------------------------------------------|
| Diabetes mellitus | E08.3391 | ICD10 | Diabetes mellitus due to underlying condition with moderate nonproliferative diabetic retinopathy without macular edema |
| Diabetes mellitus | E08.3392 | ICD10 | Diabetes mellitus due to underlying condition with moderate nonproliferative diabetic retinopathy without macular edema |
| Diabetes mellitus | E08.3393 | ICD10 | Diabetes with moderate nonp rtnop without macular edema                                                                 |
| Diabetes mellitus | E08.3399 | ICD10 | Diabetes mellitus due to underlying condition with moderate nonproliferative diabetic retinopathy without macular edema |
| Diabetes mellitus | E08.34   | ICD10 | Diabetes mellitus due to underlying condition with severe nonproliferative diabetic retinopathy                         |
| Diabetes mellitus | E08.341  | ICD10 | Diabetes mellitus due to underlying condition with severe nonproliferative diabetic retinopathy with macular edema      |
| Diabetes mellitus | E08.3411 | ICD10 | Diabetes with severe nonp rtnop with macular edema                                                                      |
| Diabetes mellitus | E08.3412 | ICD10 | Diabetes with severe nonp rtnop with macular edema                                                                      |
| Diabetes mellitus | E08.3413 | ICD10 | Diabetes with severe nonp rtnop with macular edema                                                                      |
| Diabetes mellitus | E08.3419 | ICD10 | Diabetes with severe nonp rtnop with macular edema                                                                      |
| Diabetes mellitus | E08.349  | ICD10 | Diabetes mellitus due to underlying condition with severe nonproliferative diabetic retinopathy without macular edema   |
| Diabetes mellitus | E08.3491 | ICD10 | Diabetes with severe nonp rtnop without macular edema                                                                   |
| Diabetes mellitus | E08.3492 | ICD10 | Diabetes mellitus due to underlying condition with severe nonproliferative diabetic retinopathy without macular edema   |

|                   |          |       |                                                                                                                                             |
|-------------------|----------|-------|---------------------------------------------------------------------------------------------------------------------------------------------|
| Diabetes mellitus | E08.3493 | ICD10 | Diabetes with severe nonp rtnop without macular edema                                                                                       |
| Diabetes mellitus | E08.3499 | ICD10 | Diabetes with severe nonp rtnop without macular edema                                                                                       |
| Diabetes mellitus | E08.35   | ICD10 | Diabetes mellitus due to underlying condition with proliferative diabetic retinopathy                                                       |
| Diabetes mellitus | E08.351  | ICD10 | Diabetes mellitus due to underlying condition with proliferative diabetic retinopathy with macular edema                                    |
| Diabetes mellitus | E08.3511 | ICD10 | Diabetes mellitus due to underlying condition with proliferative diabetic retinopathy with macular edema                                    |
| Diabetes mellitus | E08.3512 | ICD10 | Diabetes mellitus due to underlying condition with proliferative diabetic retinopathy with macular edema                                    |
| Diabetes mellitus | E08.3513 | ICD10 | Diabetes with prolif diabetic rtnop with macular edema                                                                                      |
| Diabetes mellitus | E08.3519 | ICD10 | Diabetes with prolif diabetic rtnop with macular edema                                                                                      |
| Diabetes mellitus | E08.352  | ICD10 | Diabetes mellitus due to underlying condition with proliferative diabetic retinopathy with traction retinal detachment involving the macula |
| Diabetes mellitus | E08.3521 | ICD10 | Diabetes mellitus due to underlying condition with proliferative diabetic retinopathy with traction retinal detachment involving the macula |
| Diabetes mellitus | E08.3522 | ICD10 | Diabetes mellitus due to underlying condition with proliferative diabetic retinopathy with traction retinal detachment involving the macula |
| Diabetes mellitus | E08.3523 | ICD10 | Diabetes mellitus due to underlying condition with proliferative diabetic retinopathy with traction retinal detachment involving the macula |
| Diabetes mellitus | E08.3529 | ICD10 | Diabetes mellitus due to underlying condition with proliferative diabetic retinopathy with traction retinal detachment involving the macula |

|                   |          |       |                                                                                                                                                                       |
|-------------------|----------|-------|-----------------------------------------------------------------------------------------------------------------------------------------------------------------------|
| Diabetes mellitus | E08.353  | ICD10 | Diabetes mellitus due to underlying condition with proliferative diabetic retinopathy with traction retinal detachment not involving the macula                       |
| Diabetes mellitus | E08.3531 | ICD10 | Diabetes mellitus due to underlying condition with proliferative diabetic retinopathy with traction retinal detachment not involving the macula                       |
| Diabetes mellitus | E08.3532 | ICD10 | Diabetes mellitus due to underlying condition with proliferative diabetic retinopathy with traction retinal detachment not involving the macula                       |
| Diabetes mellitus | E08.3533 | ICD10 | Diabetes mellitus due to underlying condition with proliferative diabetic retinopathy with traction retinal detachment not involving the macula                       |
| Diabetes mellitus | E08.3539 | ICD10 | Diabetes mellitus due to underlying condition with proliferative diabetic retinopathy with traction retinal detachment not involving the macula                       |
| Diabetes mellitus | E08.354  | ICD10 | Diabetes mellitus due to underlying condition with proliferative diabetic retinopathy with combined traction retinal detachment and rhegmatogenous retinal detachment |
| Diabetes mellitus | E08.3541 | ICD10 | Diabetes with proliferative diabetic retinopathy with combined traction retinal detachment and rhegmatogenous retinal detachment                                      |
| Diabetes mellitus | E08.3542 | ICD10 | Diabetes with proliferative diabetic retinopathy with combined traction retinal detachment and rhegmatogenous retinal detachment                                      |
| Diabetes mellitus | E08.3543 | ICD10 | Diabetes with proliferative diabetic retinopathy with combined traction retinal detachment and rhegmatogenous retinal detachment                                      |
| Diabetes mellitus | E08.3549 | ICD10 | Diabetes with proliferative diabetic retinopathy with combined traction retinal detachment and rhegmatogenous retinal detachment                                      |
| Diabetes mellitus | E08.355  | ICD10 | Diabetes mellitus due to underlying condition with stable proliferative diabetic retinopathy                                                                          |

|                   |          |       |                                                                                                             |
|-------------------|----------|-------|-------------------------------------------------------------------------------------------------------------|
| Diabetes mellitus | E08.3551 | ICD10 | Diabetes with stable proliferative diabetic retinopathy                                                     |
| Diabetes mellitus | E08.3552 | ICD10 | Diabetes with stable proliferative diabetic retinopathy                                                     |
| Diabetes mellitus | E08.3553 | ICD10 | Diabetes with stable proliferative diabetic retinopathy                                                     |
| Diabetes mellitus | E08.3559 | ICD10 | Diabetes with stable proliferative diabetic retinopathy                                                     |
| Diabetes mellitus | E08.359  | ICD10 | Diabetes mellitus due to underlying condition with proliferative diabetic retinopathy without macular edema |
| Diabetes mellitus | E08.3591 | ICD10 | Diabetes mellitus due to underlying condition with proliferative diabetic retinopathy without macular edema |
| Diabetes mellitus | E08.3592 | ICD10 | Diabetes mellitus due to underlying condition with proliferative diabetic retinopathy without macular edema |
| Diabetes mellitus | E08.3593 | ICD10 | Diabetes mellitus due to underlying condition with proliferative diabetic retinopathy without macular edema |
| Diabetes mellitus | E08.3599 | ICD10 | Diabetes mellitus due to underlying condition with proliferative diabetic retinopathy without macular edema |
| Diabetes mellitus | E08.36   | ICD10 | Diabetes mellitus due to underlying condition with diabetic cataract                                        |
| Diabetes mellitus | E08.37   | ICD10 | Diabetes mellitus due to underlying condition with diabetic macular edema                                   |
| Diabetes mellitus | E08.37X1 | ICD10 | Diabetes mellitus due to underlying condition with diabetic macular edema                                   |
| Diabetes mellitus | E08.37X2 | ICD10 | Diabetes mellitus due to underlying condition with diabetic macular edema                                   |
| Diabetes mellitus | E08.37X3 | ICD10 | Diabetes with diabetic macular edema                                                                        |
| Diabetes mellitus | E08.37X9 | ICD10 | Diabetes mellitus due to underlying condition with diabetic macular edema                                   |
| Diabetes mellitus | E08.39   | ICD10 | Diabetes mellitus due to underlying condition with other diabetic ophthalmic complication                   |
| Diabetes mellitus | E08.4    | ICD10 | Diabetes mellitus due to underlying condition with neurological complications                               |

|                   |         |       |                                                                                                    |
|-------------------|---------|-------|----------------------------------------------------------------------------------------------------|
| Diabetes mellitus | E08.40  | ICD10 | Diabetes mellitus due to underlying condition with diabetic neuropathy                             |
| Diabetes mellitus | E08.41  | ICD10 | Diabetes mellitus due to underlying condition with diabetic mononeuropathy                         |
| Diabetes mellitus | E08.42  | ICD10 | Diabetes mellitus due to underlying condition with diabetic polyneuropathy                         |
| Diabetes mellitus | E08.43  | ICD10 | Diabetes mellitus due to underlying condition with diabetic autonomic (poly)neuropathy             |
| Diabetes mellitus | E08.44  | ICD10 | Diabetes mellitus due to underlying condition with diabetic amyotrophy                             |
| Diabetes mellitus | E08.49  | ICD10 | Diabetes mellitus due to underlying condition with other diabetic neurological complication        |
| Diabetes mellitus | E08.5   | ICD10 | Diabetes mellitus due to underlying condition with circulatory complications                       |
| Diabetes mellitus | E08.51  | ICD10 | Diabetes mellitus due to underlying condition with diabetic peripheral angiopathy without gangrene |
| Diabetes mellitus | E08.52  | ICD10 | Diabetes mellitus due to underlying condition with diabetic peripheral angiopathy with gangrene    |
| Diabetes mellitus | E08.59  | ICD10 | Diabetes mellitus due to underlying condition with other circulatory complications                 |
| Diabetes mellitus | E08.6   | ICD10 | Diabetes mellitus due to underlying condition with other specified complications                   |
| Diabetes mellitus | E08.61  | ICD10 | Diabetes mellitus due to underlying condition with diabetic arthropathy                            |
| Diabetes mellitus | E08.610 | ICD10 | Diabetes mellitus due to underlying condition with diabetic neuropathic arthropathy                |
| Diabetes mellitus | E08.618 | ICD10 | Diabetes mellitus due to underlying condition with other diabetic arthropathy                      |
| Diabetes mellitus | E08.62  | ICD10 | Diabetes mellitus due to underlying condition with skin complications                              |
| Diabetes mellitus | E08.620 | ICD10 | Diabetes mellitus due to underlying condition with diabetic necrobiosis lipoidica                  |

|                   |         |       |                                                                                                                            |
|-------------------|---------|-------|----------------------------------------------------------------------------------------------------------------------------|
| Diabetes mellitus | E08.621 | ICD10 | Diabetes mellitus due to underlying condition with foot ulcer                                                              |
| Diabetes mellitus | E08.622 | ICD10 | Diabetes mellitus due to underlying condition with other skin ulcer                                                        |
| Diabetes mellitus | E08.628 | ICD10 | Diabetes mellitus due to underlying condition with other skin complications                                                |
| Diabetes mellitus | E08.63  | ICD10 | Diabetes mellitus due to underlying condition with oral complications                                                      |
| Diabetes mellitus | E08.630 | ICD10 | Diabetes mellitus due to underlying condition with periodontal disease                                                     |
| Diabetes mellitus | E08.638 | ICD10 | Diabetes mellitus due to underlying condition with other oral complications                                                |
| Diabetes mellitus | E08.64  | ICD10 | Diabetes mellitus due to underlying condition with hypoglycemia                                                            |
| Diabetes mellitus | E08.641 | ICD10 | Diabetes mellitus due to underlying condition with hypoglycemia with coma                                                  |
| Diabetes mellitus | E08.649 | ICD10 | Diabetes mellitus due to underlying condition with hypoglycemia without coma                                               |
| Diabetes mellitus | E08.65  | ICD10 | Diabetes mellitus due to underlying condition with hyperglycemia                                                           |
| Diabetes mellitus | E08.69  | ICD10 | Diabetes mellitus due to underlying condition with other specified complication                                            |
| Diabetes mellitus | E08.8   | ICD10 | Diabetes mellitus due to underlying condition with unspecified complications                                               |
| Diabetes mellitus | E08.9   | ICD10 | Diabetes mellitus due to underlying condition without complications                                                        |
| Diabetes mellitus | E09     | ICD10 | Drug or chemical induced diabetes mellitus                                                                                 |
| Diabetes mellitus | E09.0   | ICD10 | Drug or chemical induced diabetes mellitus with hyperosmolarity                                                            |
| Diabetes mellitus | E09.00  | ICD10 | Drug or chemical induced diabetes mellitus with hyperosmolarity without nonketotic hyperglycemic-hyperosmolar coma (NKHHC) |
| Diabetes mellitus | E09.01  | ICD10 | Drug or chemical induced diabetes mellitus with hyperosmolarity with coma                                                  |
| Diabetes mellitus | E09.1   | ICD10 | Drug or chemical induced diabetes mellitus with ketoacidosis                                                               |

|                   |          |       |                                                                                                               |
|-------------------|----------|-------|---------------------------------------------------------------------------------------------------------------|
| Diabetes mellitus | E09.10   | ICD10 | Drug or chemical induced diabetes mellitus with ketoacidosis without coma                                     |
| Diabetes mellitus | E09.11   | ICD10 | Drug or chemical induced diabetes mellitus with ketoacidosis with coma                                        |
| Diabetes mellitus | E09.2    | ICD10 | Drug or chemical induced diabetes mellitus with kidney complications                                          |
| Diabetes mellitus | E09.21   | ICD10 | Drug or chemical induced diabetes mellitus with diabetic nephropathy                                          |
| Diabetes mellitus | E09.22   | ICD10 | Drug or chemical induced diabetes mellitus with diabetic chronic kidney disease                               |
| Diabetes mellitus | E09.29   | ICD10 | Drug or chemical induced diabetes mellitus with other diabetic kidney complication                            |
| Diabetes mellitus | E09.3    | ICD10 | Drug or chemical induced diabetes mellitus with ophthalmic complications                                      |
| Diabetes mellitus | E09.31   | ICD10 | Drug or chemical induced diabetes mellitus with unspecified diabetic retinopathy                              |
| Diabetes mellitus | E09.311  | ICD10 | Drug or chemical induced diabetes mellitus with unspecified diabetic retinopathy with macular edema           |
| Diabetes mellitus | E09.319  | ICD10 | Drug or chemical induced diabetes mellitus with unspecified diabetic retinopathy without macular edema        |
| Diabetes mellitus | E09.32   | ICD10 | Drug or chemical induced diabetes mellitus with mild nonproliferative diabetic retinopathy                    |
| Diabetes mellitus | E09.321  | ICD10 | Drug or chemical induced diabetes mellitus with mild nonproliferative diabetic retinopathy with macular edema |
| Diabetes mellitus | E09.3211 | ICD10 | Drug or chemical induced diabetes mellitus with mild nonproliferative diabetic retinopathy with macular edema |
| Diabetes mellitus | E09.3212 | ICD10 | Drug/chem diab with mild nonp rtnop with mclr edema                                                           |
| Diabetes mellitus | E09.3213 | ICD10 | Drug/chem diab with mild nonp rtnop with macular edema                                                        |



|                   |          |       |                                                                                                                      |
|-------------------|----------|-------|----------------------------------------------------------------------------------------------------------------------|
| Diabetes mellitus | E09.3219 | ICD10 | Drug/chem diab with mild nonp rtnop with macular edema                                                               |
| Diabetes mellitus | E09.329  | ICD10 | Drug or chemical induced diabetes mellitus with mild nonproliferative diabetic retinopathy without macular edema     |
| Diabetes mellitus | E09.3291 | ICD10 | Drug/chem diab with mild nonp rtnop w/o mclr edema                                                                   |
| Diabetes mellitus | E09.3292 | ICD10 | Drug/chem diab with mild nonp rtnop w/o mclr edema                                                                   |
| Diabetes mellitus | E09.3293 | ICD10 | Drug/chem diab with mild nonp rtnop without mclr edema                                                               |
| Diabetes mellitus | E09.3299 | ICD10 | Drug/chem diab with mild nonp rtnop without mclr edema                                                               |
| Diabetes mellitus | E09.33   | ICD10 | Drug or chemical induced diabetes mellitus with moderate nonproliferative diabetic retinopathy                       |
| Diabetes mellitus | E09.331  | ICD10 | Drug or chemical induced diabetes mellitus with moderate nonproliferative diabetic retinopathy with macular edema    |
| Diabetes mellitus | E09.3311 | ICD10 | Drug/chem diab with mod nonp rtnop with macular edema                                                                |
| Diabetes mellitus | E09.3312 | ICD10 | Drug/chem diab with mod nonp rtnop with macular edema                                                                |
| Diabetes mellitus | E09.3313 | ICD10 | Drug/chem diab with mod nonp rtnop with macular edema                                                                |
| Diabetes mellitus | E09.3319 | ICD10 | Drug/chem diab with mod nonp rtnop with macular edema                                                                |
| Diabetes mellitus | E09.339  | ICD10 | Drug or chemical induced diabetes mellitus with moderate nonproliferative diabetic retinopathy without macular edema |
| Diabetes mellitus | E09.3391 | ICD10 | Drug/chem diab with mod nonp rtnop without mclr edema                                                                |
| Diabetes mellitus | E09.3392 | ICD10 | Drug/chem diab with mod nonp rtnop without mclr edema                                                                |
| Diabetes mellitus | E09.3393 | ICD10 | Drug/chem diab with mod nonp rtnop without macular edema                                                             |

|    |                   |          |                                                                                                                          |
|----|-------------------|----------|--------------------------------------------------------------------------------------------------------------------------|
| 1  |                   |          |                                                                                                                          |
| 2  |                   |          |                                                                                                                          |
| 3  |                   |          |                                                                                                                          |
| 4  | Diabetes mellitus | E09.3399 | ICD10 Drug/chem diab with mod nonp rtnop without mclr edema                                                              |
| 5  |                   |          |                                                                                                                          |
| 6  | Diabetes mellitus | E09.34   | ICD10 Drug or chemical induced diabetes mellitus with severe nonproliferative diabetic retinopathy                       |
| 7  |                   |          |                                                                                                                          |
| 8  |                   |          |                                                                                                                          |
| 9  |                   |          |                                                                                                                          |
| 10 |                   |          |                                                                                                                          |
| 11 | Diabetes mellitus | E09.341  | ICD10 Drug or chemical induced diabetes mellitus with severe nonproliferative diabetic retinopathy with macular edema    |
| 12 |                   |          |                                                                                                                          |
| 13 |                   |          |                                                                                                                          |
| 14 |                   |          |                                                                                                                          |
| 15 | Diabetes mellitus | E09.3411 | ICD10 Drug/chem diab with severe nonp rtnop with mclr edema                                                              |
| 16 |                   |          |                                                                                                                          |
| 17 |                   |          |                                                                                                                          |
| 18 | Diabetes mellitus | E09.3412 | ICD10 Drug/chem diab with severe nonp rtnop with mclr edema                                                              |
| 19 |                   |          |                                                                                                                          |
| 20 |                   |          |                                                                                                                          |
| 21 | Diabetes mellitus | E09.3413 | ICD10 Drug/chem diab with severe nonp rtnop with macular edema                                                           |
| 22 |                   |          |                                                                                                                          |
| 23 |                   |          |                                                                                                                          |
| 24 | Diabetes mellitus | E09.3419 | ICD10 Drug/chem diab with severe nonp rtnop with mclr edema                                                              |
| 25 |                   |          |                                                                                                                          |
| 26 |                   |          |                                                                                                                          |
| 27 | Diabetes mellitus | E09.349  | ICD10 Drug or chemical induced diabetes mellitus with severe nonproliferative diabetic retinopathy without macular edema |
| 28 |                   |          |                                                                                                                          |
| 29 |                   |          |                                                                                                                          |
| 30 |                   |          |                                                                                                                          |
| 31 | Diabetes mellitus | E09.3491 | ICD10 Drug/chem diab with severe nonp rtnop w/o mclr edema                                                               |
| 32 |                   |          |                                                                                                                          |
| 33 |                   |          |                                                                                                                          |
| 34 | Diabetes mellitus | E09.3492 | ICD10 Drug/chem diab with severe nonp rtnop w/o mclr edema                                                               |
| 35 |                   |          |                                                                                                                          |
| 36 |                   |          |                                                                                                                          |
| 37 | Diabetes mellitus | E09.3493 | ICD10 Drug/chem diab with severe nonp rtnop without mclr edema                                                           |
| 38 |                   |          |                                                                                                                          |
| 39 |                   |          |                                                                                                                          |
| 40 | Diabetes mellitus | E09.3499 | ICD10 Drug/chem diab with severe nonp rtnop w/o mclr edema                                                               |
| 41 |                   |          |                                                                                                                          |
| 42 |                   |          |                                                                                                                          |
| 43 | Diabetes mellitus | E09.35   | ICD10 Drug or chemical induced diabetes mellitus with proliferative diabetic retinopathy                                 |
| 44 |                   |          |                                                                                                                          |
| 45 |                   |          |                                                                                                                          |
| 46 | Diabetes mellitus | E09.351  | ICD10 Drug or chemical induced diabetes mellitus with proliferative diabetic retinopathy with macular edema              |
| 47 |                   |          |                                                                                                                          |
| 48 |                   |          |                                                                                                                          |
| 49 |                   |          |                                                                                                                          |
| 50 | Diabetes mellitus | E09.3511 | ICD10 Drug/chem diab with prolif diab rtnop with mclr edema                                                              |
| 51 |                   |          |                                                                                                                          |
| 52 |                   |          |                                                                                                                          |
| 53 | Diabetes mellitus | E09.3512 | ICD10 Drug/chem diab with prolif diab rtnop with mclr edema                                                              |
| 54 |                   |          |                                                                                                                          |
| 55 |                   |          |                                                                                                                          |
| 56 |                   |          |                                                                                                                          |
| 57 |                   |          |                                                                                                                          |
| 58 |                   |          |                                                                                                                          |
| 59 |                   |          |                                                                                                                          |
| 60 |                   |          |                                                                                                                          |

|                   |          |       |                                                                                                                                                                    |
|-------------------|----------|-------|--------------------------------------------------------------------------------------------------------------------------------------------------------------------|
| Diabetes mellitus | E09.3513 | ICD10 | Drug/chem diab with prolif diab rtnop with macular edema                                                                                                           |
| Diabetes mellitus | E09.3519 | ICD10 | Drug/chem diab with prolif diab rtnop with mclr edema                                                                                                              |
| Diabetes mellitus | E09.352  | ICD10 | Drug or chemical induced diabetes mellitus with proliferative diabetic retinopathy with traction retinal detachment involving the macula                           |
| Diabetes mellitus | E09.3521 | ICD10 | Drug/chem diab w prolif diab rtnop w trctn dtch macula                                                                                                             |
| Diabetes mellitus | E09.3522 | ICD10 | Drug/chem diab w prolif diab rtnop w trctn dtch macula                                                                                                             |
| Diabetes mellitus | E09.3523 | ICD10 | Drug/chem diab w prolif diab rtnop w trctn dtch macula                                                                                                             |
| Diabetes mellitus | E09.3529 | ICD10 | Drug/chem diab w prolif diab rtnop w trctn dtch macula                                                                                                             |
| Diabetes mellitus | E09.353  | ICD10 | Drug or chemical induced diabetes mellitus with proliferative diabetic retinopathy with traction retinal detachment not involving the macula                       |
| Diabetes mellitus | E09.3531 | ICD10 | Drug/chem diab w prolif diab rtnop w trctn dtch n-mcla                                                                                                             |
| Diabetes mellitus | E09.3532 | ICD10 | Drug/chem diab w prolif diab rtnop w trctn dtch n-mcla                                                                                                             |
| Diabetes mellitus | E09.3533 | ICD10 | Drug/chem diab w prolif diab rtnop w trctn dtch n-mcla                                                                                                             |
| Diabetes mellitus | E09.3539 | ICD10 | Drug/chem diab w prolif diab rtnop w trctn dtch n-mcla                                                                                                             |
| Diabetes mellitus | E09.354  | ICD10 | Drug or chemical induced diabetes mellitus with proliferative diabetic retinopathy with combined traction retinal detachment and rhegmatogenous retinal detachment |
| Diabetes mellitus | E09.3541 | ICD10 | Drug/chem diab w prolif diab rtnop with comb detach                                                                                                                |
| Diabetes mellitus | E09.3542 | ICD10 | Drug/chem diab w prolif diab rtnop with comb detach                                                                                                                |
| Diabetes mellitus | E09.3543 | ICD10 | Drug/chem diab with prolif diab rtnop with comb detach                                                                                                             |

|    |                   |          |                                                                                                                |
|----|-------------------|----------|----------------------------------------------------------------------------------------------------------------|
| 1  |                   |          |                                                                                                                |
| 2  |                   |          |                                                                                                                |
| 3  |                   |          |                                                                                                                |
| 4  | Diabetes mellitus | E09.3549 | ICD10 Drug/chem diab with proliferative diabetic retinopathy with combined detachment                          |
| 5  |                   |          |                                                                                                                |
| 6  | Diabetes mellitus | E09.355  | ICD10 Drug or chemical induced diabetes mellitus with stable proliferative diabetic retinopathy                |
| 7  |                   |          |                                                                                                                |
| 8  |                   |          |                                                                                                                |
| 9  |                   |          |                                                                                                                |
| 10 | Diabetes mellitus | E09.3551 | ICD10 Drug/chem diabetes with stable proliferative diabetic retinopathy                                        |
| 11 |                   |          |                                                                                                                |
| 12 |                   |          |                                                                                                                |
| 13 | Diabetes mellitus | E09.3552 | ICD10 Drug/chem diabetes with stable proliferative diabetic retinopathy                                        |
| 14 |                   |          |                                                                                                                |
| 15 | Diabetes mellitus | E09.3553 | ICD10 Drug/chem diabetes with stable proliferative diabetic retinopathy                                        |
| 16 |                   |          |                                                                                                                |
| 17 | Diabetes mellitus | E09.3559 | ICD10 Drug/chem diabetes with stable proliferative diabetic retinopathy                                        |
| 18 |                   |          |                                                                                                                |
| 19 |                   |          |                                                                                                                |
| 20 | Diabetes mellitus | E09.359  | ICD10 Drug or chemical induced diabetes mellitus with proliferative diabetic retinopathy without macular edema |
| 21 |                   |          |                                                                                                                |
| 22 |                   |          |                                                                                                                |
| 23 | Diabetes mellitus | E09.3591 | ICD10 Drug/chem diabetes with proliferative diabetic retinopathy without macular edema                         |
| 24 |                   |          |                                                                                                                |
| 25 | Diabetes mellitus | E09.3592 | ICD10 Drug/chem diabetes with proliferative diabetic retinopathy without macular edema                         |
| 26 |                   |          |                                                                                                                |
| 27 | Diabetes mellitus | E09.3593 | ICD10 Drug/chem diabetes with proliferative diabetic retinopathy without macular edema                         |
| 28 |                   |          |                                                                                                                |
| 29 | Diabetes mellitus | E09.3599 | ICD10 Drug/chem diabetes with proliferative diabetic retinopathy without macular edema                         |
| 30 |                   |          |                                                                                                                |
| 31 | Diabetes mellitus | E09.36   | ICD10 Drug or chemical induced diabetes mellitus with diabetic cataract                                        |
| 32 |                   |          |                                                                                                                |
| 33 | Diabetes mellitus | E09.37   | ICD10 Drug or chemical induced diabetes mellitus with diabetic macular edema                                   |
| 34 |                   |          |                                                                                                                |
| 35 | Diabetes mellitus | E09.37X1 | ICD10 Drug/chem diabetes with diabetic macular edema                                                           |
| 36 | Diabetes mellitus | E09.37X2 | ICD10 Drug/chem diabetes with diabetic macular edema                                                           |
| 37 | Diabetes mellitus | E09.37X3 | ICD10 Drug/chem diabetes with diabetic macular edema                                                           |
| 38 | Diabetes mellitus | E09.37X9 | ICD10 Drug/chem diabetes with diabetic macular edema                                                           |
| 39 |                   |          |                                                                                                                |
| 40 | Diabetes mellitus | E09.39   | ICD10 Drug/chem diabetes with other diabetic ophthalmic complication                                           |
| 41 |                   |          |                                                                                                                |
| 42 | Diabetes mellitus | E09.4    | ICD10 Drug or chemical induced diabetes mellitus with neurological complications                               |
| 43 |                   |          |                                                                                                                |
| 44 | Diabetes mellitus | E09.40   | ICD10 Drug or chemical induced diabetes mellitus with neurological complications with diabetic neuropathy      |
| 45 |                   |          |                                                                                                                |
| 46 |                   |          |                                                                                                                |
| 47 |                   |          |                                                                                                                |
| 48 |                   |          |                                                                                                                |
| 49 |                   |          |                                                                                                                |
| 50 |                   |          |                                                                                                                |
| 51 |                   |          |                                                                                                                |
| 52 |                   |          |                                                                                                                |
| 53 |                   |          |                                                                                                                |
| 54 |                   |          |                                                                                                                |
| 55 |                   |          |                                                                                                                |
| 56 |                   |          |                                                                                                                |
| 57 |                   |          |                                                                                                                |
| 58 |                   |          |                                                                                                                |
| 59 |                   |          |                                                                                                                |
| 60 |                   |          |                                                                                                                |

|    |                   |         |                                                                                                                           |
|----|-------------------|---------|---------------------------------------------------------------------------------------------------------------------------|
| 1  |                   |         |                                                                                                                           |
| 2  |                   |         |                                                                                                                           |
| 3  |                   |         |                                                                                                                           |
| 4  | Diabetes mellitus | E09.41  | ICD10 Drug/chem diabetes w neuro comp w diabetic mononeuropathy                                                           |
| 5  |                   |         |                                                                                                                           |
| 6  | Diabetes mellitus | E09.42  | ICD10 Drug or chemical induced diabetes mellitus with neurological complications with diabetic polyneuropathy             |
| 7  |                   |         |                                                                                                                           |
| 8  |                   |         |                                                                                                                           |
| 9  |                   |         |                                                                                                                           |
| 10 |                   |         |                                                                                                                           |
| 11 | Diabetes mellitus | E09.43  | ICD10 Drug or chemical induced diabetes mellitus with neurological complications with diabetic autonomic (poly)neuropathy |
| 12 |                   |         |                                                                                                                           |
| 13 |                   |         |                                                                                                                           |
| 14 |                   |         |                                                                                                                           |
| 15 | Diabetes mellitus | E09.44  | ICD10 Drug/chem diabetes w neurological comp w diabetic amyotrophy                                                        |
| 16 |                   |         |                                                                                                                           |
| 17 |                   |         |                                                                                                                           |
| 18 | Diabetes mellitus | E09.49  | ICD10 Drug/chem diabetes w neuro comp w oth diabetic neuro comp                                                           |
| 19 |                   |         |                                                                                                                           |
| 20 |                   |         |                                                                                                                           |
| 21 | Diabetes mellitus | E09.5   | ICD10 Drug or chemical induced diabetes mellitus with circulatory complications                                           |
| 22 |                   |         |                                                                                                                           |
| 23 |                   |         |                                                                                                                           |
| 24 | Diabetes mellitus | E09.51  | ICD10 Drug or chemical induced diabetes mellitus with diabetic peripheral angiopathy without gangrene                     |
| 25 |                   |         |                                                                                                                           |
| 26 |                   |         |                                                                                                                           |
| 27 | Diabetes mellitus | E09.52  | ICD10 Drug/chem diabetes w diabetic prph angiopath w gangrene                                                             |
| 28 |                   |         |                                                                                                                           |
| 29 |                   |         |                                                                                                                           |
| 30 | Diabetes mellitus | E09.59  | ICD10 Drug/chem diabetes mellitus w oth circulatory complications                                                         |
| 31 |                   |         |                                                                                                                           |
| 32 |                   |         |                                                                                                                           |
| 33 | Diabetes mellitus | E09.6   | ICD10 Drug or chemical induced diabetes mellitus with other specified complications                                       |
| 34 |                   |         |                                                                                                                           |
| 35 |                   |         |                                                                                                                           |
| 36 | Diabetes mellitus | E09.61  | ICD10 Drug or chemical induced diabetes mellitus with diabetic arthropathy                                                |
| 37 |                   |         |                                                                                                                           |
| 38 |                   |         |                                                                                                                           |
| 39 | Diabetes mellitus | E09.610 | ICD10 Drug/chem diabetes w diabetic neuropathic arthropathy                                                               |
| 40 |                   |         |                                                                                                                           |
| 41 |                   |         |                                                                                                                           |
| 42 | Diabetes mellitus | E09.618 | ICD10 Drug/chem diabetes mellitus w oth diabetic arthropathy                                                              |
| 43 |                   |         |                                                                                                                           |
| 44 |                   |         |                                                                                                                           |
| 45 | Diabetes mellitus | E09.62  | ICD10 Drug or chemical induced diabetes mellitus with skin complications                                                  |
| 46 |                   |         |                                                                                                                           |
| 47 |                   |         |                                                                                                                           |
| 48 | Diabetes mellitus | E09.620 | ICD10 Drug/chem diabetes mellitus w diabetic dermatitis                                                                   |
| 49 |                   |         |                                                                                                                           |
| 50 |                   |         |                                                                                                                           |
| 51 | Diabetes mellitus | E09.621 | ICD10 Drug or chemical induced diabetes mellitus with foot ulcer                                                          |
| 52 |                   |         |                                                                                                                           |
| 53 |                   |         |                                                                                                                           |
| 54 | Diabetes mellitus | E09.622 | ICD10 Drug or chemical induced diabetes mellitus with other skin ulcer                                                    |
| 55 |                   |         |                                                                                                                           |
| 56 |                   |         |                                                                                                                           |
| 57 |                   |         |                                                                                                                           |
| 58 |                   |         |                                                                                                                           |
| 59 |                   |         |                                                                                                                           |
| 60 |                   |         |                                                                                                                           |

|                   |         |       |                                                                                                                   |
|-------------------|---------|-------|-------------------------------------------------------------------------------------------------------------------|
| Diabetes mellitus | E09.628 | ICD10 | Drug/chem diabetes mellitus w oth skin complications                                                              |
| Diabetes mellitus | E09.63  | ICD10 | Drug or chemical induced diabetes mellitus with oral complications                                                |
| Diabetes mellitus | E09.630 | ICD10 | Drug/chem diabetes mellitus w periodontal disease                                                                 |
| Diabetes mellitus | E09.638 | ICD10 | Drug/chem diabetes mellitus w oth oral complications                                                              |
| Diabetes mellitus | E09.64  | ICD10 | Drug or chemical induced diabetes mellitus with hypoglycemia                                                      |
| Diabetes mellitus | E09.641 | ICD10 | Drug/chem diabetes mellitus w hypoglycemia w coma                                                                 |
| Diabetes mellitus | E09.649 | ICD10 | Drug or chemical induced diabetes mellitus with hypoglycemia without coma                                         |
| Diabetes mellitus | E09.65  | ICD10 | Drug or chemical induced diabetes mellitus with hyperglycemia                                                     |
| Diabetes mellitus | E09.69  | ICD10 | Drug or chemical induced diabetes mellitus with other specified complication                                      |
| Diabetes mellitus | E09.8   | ICD10 | Drug or chemical induced diabetes mellitus with unspecified complications                                         |
| Diabetes mellitus | E09.9   | ICD10 | Drug or chemical induced diabetes mellitus without complications                                                  |
| Diabetes mellitus | E13.0   | ICD10 | Other specified diabetes mellitus                                                                                 |
| Diabetes mellitus | E13.0   | ICD10 | Other specified diabetes mellitus with hyperosmolarity                                                            |
| Diabetes mellitus | E13.00  | ICD10 | Other specified diabetes mellitus with hyperosmolarity without nonketotic hyperglycemic-hyperosmolar coma (NKHHC) |
| Diabetes mellitus | E13.01  | ICD10 | Other specified diabetes mellitus with hyperosmolarity with coma                                                  |
| Diabetes mellitus | E13.1   | ICD10 | Other specified diabetes mellitus with ketoacidosis                                                               |
| Diabetes mellitus | E13.10  | ICD10 | Other specified diabetes mellitus with ketoacidosis without coma                                                  |
| Diabetes mellitus | E13.11  | ICD10 | Other specified diabetes mellitus with ketoacidosis with coma                                                     |

|                   |          |       |                                                                                 |
|-------------------|----------|-------|---------------------------------------------------------------------------------|
| Diabetes mellitus | E13.2    | ICD10 | Other specified diabetes mellitus with kidney complications                     |
| Diabetes mellitus | E13.21   | ICD10 | Other specified diabetes mellitus with diabetic nephropathy                     |
| Diabetes mellitus | E13.22   | ICD10 | Other specified diabetes mellitus with diabetic chronic kidney disease          |
| Diabetes mellitus | E13.29   | ICD10 | Other specified diabetes mellitus with other diabetic kidney complication       |
| Diabetes mellitus | E13.3    | ICD10 | Other specified diabetes mellitus with ophthalmic complications                 |
| Diabetes mellitus | E13.36   | ICD10 | Other specified diabetes mellitus with diabetic cataract                        |
| Diabetes mellitus | E13.37   | ICD10 | Other specified diabetes mellitus with diabetic macular edema                   |
| Diabetes mellitus | E13.37X1 | ICD10 | Other specified diabetes mellitus with diabetic macular edema                   |
| Diabetes mellitus | E13.37X2 | ICD10 | Other specified diabetes mellitus with diabetic macular edema                   |
| Diabetes mellitus | E13.37X3 | ICD10 | Other specified diabetes mellitus with diabetic macular edema                   |
| Diabetes mellitus | E13.37X9 | ICD10 | Other specified diabetes mellitus with diabetic macular edema                   |
| Diabetes mellitus | E13.39   | ICD10 | Other specified diabetes mellitus with other diabetic ophthalmic complication   |
| Diabetes mellitus | E13.4    | ICD10 | Other specified diabetes mellitus with neurological complications               |
| Diabetes mellitus | E13.40   | ICD10 | Other specified diabetes mellitus with diabetic neuropathy                      |
| Diabetes mellitus | E13.41   | ICD10 | Other specified diabetes mellitus with diabetic mononeuropathy                  |
| Diabetes mellitus | E13.42   | ICD10 | Other specified diabetes mellitus with diabetic polyneuropathy                  |
| Diabetes mellitus | E13.43   | ICD10 | Other specified diabetes mellitus with diabetic autonomic (poly)neuropathy      |
| Diabetes mellitus | E13.44   | ICD10 | Other specified diabetes mellitus with diabetic amyotrophy                      |
| Diabetes mellitus | E13.49   | ICD10 | Other specified diabetes mellitus with other diabetic neurological complication |
| Diabetes mellitus | E13.5    | ICD10 | Other specified diabetes mellitus with circulatory complications                |

|                   |         |       |                                                                                        |
|-------------------|---------|-------|----------------------------------------------------------------------------------------|
| Diabetes mellitus | E13.51  | ICD10 | Other specified diabetes mellitus with diabetic peripheral angiopathy without gangrene |
| Diabetes mellitus | E13.52  | ICD10 | Other specified diabetes mellitus with diabetic peripheral angiopathy with gangrene    |
| Diabetes mellitus | E13.59  | ICD10 | Other specified diabetes mellitus with other circulatory complications                 |
| Diabetes mellitus | E13.6   | ICD10 | Other specified diabetes mellitus with other specified complications                   |
| Diabetes mellitus | E13.61  | ICD10 | Other specified diabetes mellitus with diabetic arthropathy                            |
| Diabetes mellitus | E13.610 | ICD10 | Other specified diabetes mellitus with diabetic neuropathic arthropathy                |
| Diabetes mellitus | E13.618 | ICD10 | Other specified diabetes mellitus with other diabetic arthropathy                      |
| Diabetes mellitus | E13.62  | ICD10 | Other specified diabetes mellitus with skin complications                              |
| Diabetes mellitus | E13.620 | ICD10 | Other specified diabetes mellitus with diabetic necrobiosis lipoidica                  |
| Diabetes mellitus | E13.621 | ICD10 | Other specified diabetes mellitus with foot ulcer                                      |
| Diabetes mellitus | E13.622 | ICD10 | Other specified diabetes mellitus with other skin ulcer                                |
| Diabetes mellitus | E13.628 | ICD10 | Other specified diabetes mellitus with other skin complications                        |
| Diabetes mellitus | E13.63  | ICD10 | Other specified diabetes mellitus with oral complications                              |
| Diabetes mellitus | E13.630 | ICD10 | Other specified diabetes mellitus with periodontal disease                             |
| Diabetes mellitus | E13.638 | ICD10 | Other specified diabetes mellitus with other oral complications                        |
| Diabetes mellitus | E13.64  | ICD10 | Other specified diabetes mellitus with hypoglycemia                                    |
| Diabetes mellitus | E13.641 | ICD10 | Other specified diabetes mellitus with hypoglycemia with coma                          |
| Diabetes mellitus | E13.649 | ICD10 | Other specified diabetes mellitus with hypoglycemia without coma                       |
| Diabetes mellitus | E13.65  | ICD10 | Other specified diabetes mellitus with hyperglycemia                                   |



|                   |        |       |                                                                     |
|-------------------|--------|-------|---------------------------------------------------------------------|
| Diabetes mellitus | E13.69 | ICD10 | Other specified diabetes mellitus with other specified complication |
| Diabetes mellitus | E13.8  | ICD10 | Other specified diabetes mellitus with unspecified complications    |
| Diabetes mellitus | E13.9  | ICD10 | Other specified diabetes mellitus without complications             |
| Heart failure     | 428    | ICD9  | Heart failure                                                       |
| Heart failure     | 428    | ICD9  | Congestive heart failure (CHF) NOS                                  |
| Heart failure     | 428    | ICD9  | Congestive heart failure (CHF) NOS **                               |
| Heart failure     | 428.1  | ICD9  | Left heart failure                                                  |
| Heart failure     | 428.2  | ICD9  | Systolic heart failure                                              |
| Heart failure     | 428.2  | ICD9  | Systolic heart failure                                              |
| Heart failure     | 428.21 | ICD9  | Systolic heart failure                                              |
| Heart failure     | 428.22 | ICD9  | Systolic heart failure                                              |
| Heart failure     | 428.23 | ICD9  | Systolic heart failure                                              |
| Heart failure     | 428.3  | ICD9  | Diastolic heart failure                                             |
| Heart failure     | 428.3  | ICD9  | Diastolic heart failure                                             |
| Heart failure     | 428.31 | ICD9  | Diastolic heart failure                                             |
| Heart failure     | 428.32 | ICD9  | Diastolic heart failure                                             |
| Heart failure     | 428.33 | ICD9  | Diastolic heart failure                                             |
| Heart failure     | 428.4  | ICD9  | Combined systolic and diastolic heart failure                       |
| Heart failure     | 428.4  | ICD9  | Combined systolic and diastolic heart failure                       |
| Heart failure     | 428.41 | ICD9  | Combined systolic and diastolic heart failure                       |
| Heart failure     | 428.42 | ICD9  | Combined systolic and diastolic heart failure                       |
| Heart failure     | 428.43 | ICD9  | Combined systolic and diastolic heart failure                       |
| Heart failure     | 428.9  | ICD9  | Heart failure unspecified                                           |
| Heart failure     | I50    | ICD10 | Heart failure                                                       |
| Heart failure     | I50.1  | ICD10 | Left ventricular failure                                            |
| Heart failure     | I50.2  | ICD10 | Systolic (congestive) heart failure                                 |
| Heart failure     | I50.20 | ICD10 | Unspecified systolic (congestive) heart failure                     |
| Heart failure     | I50.21 | ICD10 | Acute systolic (congestive) heart failure                           |
| Heart failure     | I50.22 | ICD10 | Chronic systolic (congestive) heart failure                         |
| Heart failure     | I50.23 | ICD10 | Acute on chronic systolic (congestive) heart failure                |

|               |         |       |                                                                                          |
|---------------|---------|-------|------------------------------------------------------------------------------------------|
| Heart failure | I50.3   | ICD10 | Diastolic (congestive) heart failure                                                     |
|               |         |       | Unspecified diastolic (congestive) heart failure                                         |
| Heart failure | I50.30  | ICD10 | failure                                                                                  |
| Heart failure | I50.31  | ICD10 | Acute diastolic (congestive) heart failure                                               |
|               |         |       |                                                                                          |
| Heart failure | I50.32  | ICD10 | Chronic diastolic (congestive) heart failure                                             |
|               |         |       | Acute on chronic diastolic (congestive) heart failure                                    |
| Heart failure | I50.33  | ICD10 | heart failure                                                                            |
|               |         |       | Combined systolic (congestive) and diastolic (congestive) heart failure                  |
| Heart failure | I50.4   | ICD10 |                                                                                          |
|               |         |       | Unspecified combined systolic (congestive) and diastolic (congestive) heart failure      |
| Heart failure | I50.40  | ICD10 | heart failure                                                                            |
|               |         |       | Acute combined systolic (congestive) and diastolic (congestive) heart failure            |
| Heart failure | I50.41  | ICD10 | heart failure                                                                            |
|               |         |       | Chronic combined systolic (congestive) and diastolic (congestive) heart failure          |
| Heart failure | I50.42  | ICD10 | and diastolic (congestive) heart failure                                                 |
|               |         |       | Acute on chronic combined systolic (congestive) and diastolic (congestive) heart failure |
| Heart failure | I50.43  | ICD10 | heart failure                                                                            |
| Heart failure | I50.8   | ICD10 | Other heart failure                                                                      |
| Heart failure | I50.81  | ICD10 | Right heart failure                                                                      |
| Heart failure | I50.810 | ICD10 | Right ventricular failure NOS                                                            |
| Heart failure | I50.811 | ICD10 | Acute right heart failure                                                                |
| Heart failure | I50.812 | ICD10 | Chronic right heart failure                                                              |
| Heart failure | I50.813 | ICD10 | Acute on chronic right heart failure                                                     |
|               |         |       | Right ventricular failure secondary to left ventricular failure                          |
| Heart failure | I50.814 | ICD10 | ventricular failure                                                                      |
| Heart failure | I50.82  | ICD10 | Biventricular heart failure                                                              |
| Heart failure | I50.83  | ICD10 | High output heart failure                                                                |
| Heart failure | I50.84  | ICD10 | Stage D heart failure                                                                    |
| Heart failure | I50.89  | ICD10 | Other heart failure                                                                      |
| Heart failure | I50.9   | ICD10 | Heart failure                                                                            |
| Hypertension  | 401     | ICD9  | Essential hypertension                                                                   |
| Hypertension  | 401.1   | ICD9  | Benign essential hypertension                                                            |
| Hypertension  | 401.9   | ICD9  | Hypertension NOS                                                                         |
| Hypertension  | 459.3   | ICD9  | Chronic venous hypertension (idiopathic)                                                 |
|               |         |       | Chronic venous hypertension without complications                                        |
| Hypertension  | 459.3   | ICD9  | complications                                                                            |
| Hypertension  | 459.31  | ICD9  | Chronic venous hypertension with ulcer                                                   |

|              |         |       |                                                                                         |
|--------------|---------|-------|-----------------------------------------------------------------------------------------|
| Hypertension | 459.32  | ICD9  | Chronic venous hypertension with inflammation                                           |
| Hypertension | 459.33  | ICD9  | Chronic venous hypertension with ulcer and inflammation                                 |
| Hypertension | 459.39  | ICD9  | Chronic venous hypertension with other complication                                     |
| Hypertension | 642     | ICD9  | Hypertension complicating pregnancy                                                     |
| Hypertension | 642.04  | ICD9  | Benign essential hypertension                                                           |
| Hypertension | 642.1   | ICD9  | Hypertension secondary to renal disease                                                 |
| Hypertension | 642.1   | ICD9  | Hypertension secondary to renal disease                                                 |
| Hypertension | 642.11  | ICD9  | Hypertension secondary to renal disease                                                 |
| Hypertension | 642.12  | ICD9  | Hypertension secondary to renal disease                                                 |
| Hypertension | 642.13  | ICD9  | Hypertension secondary to renal disease                                                 |
| Hypertension | 642.14  | ICD9  | Hypertension secondary to renal disease                                                 |
| Hypertension | 642.2   | ICD9  | Other pre-existing hypertension complicating pregnancy                                  |
| Hypertension | 642.2   | ICD9  | Other pre-existing hypertension complicating pregnancy                                  |
| Hypertension | 642.21  | ICD9  | Other pre-existing hypertension                                                         |
| Hypertension | 642.22  | ICD9  | Other pre-existing hypertension                                                         |
| Hypertension | 642.23  | ICD9  | Other pre-existing hypertension                                                         |
| Hypertension | 642.24  | ICD9  | Other pre-existing hypertension                                                         |
| Hypertension | 642.9   | ICD9  | Unspecified hypertension complicating pregnancy                                         |
| Hypertension | 642.9   | ICD9  | Unspecified hypertension complicating pregnancy                                         |
| Hypertension | 642.91  | ICD9  | Unspecified hypertension                                                                |
| Hypertension | 642.92  | ICD9  | Unspecified hypertension                                                                |
| Hypertension | 642.93  | ICD9  | Unspecified antepartum hypertension                                                     |
| Hypertension | 642.94  | ICD9  | Unspecified postpartum hypertension                                                     |
| Hypertension | 997.91  | ICD9  | Hypertension                                                                            |
| Hypertension | I10     | ICD10 | Essential (primary) hypertension                                                        |
| Hypertension | I27.0   | ICD10 | Primary pulmonary hypertension                                                          |
| Hypertension | I87.3   | ICD10 | Chronic venous hypertension (idiopathic)                                                |
| Hypertension | I87.30  | ICD10 | Chronic venous hypertension (idiopathic) without complications                          |
| Hypertension | I87.301 | ICD10 | Chronic venous hypertension (idiopathic) without complications of right lower extremity |

|              |         |       |                                                                                               |
|--------------|---------|-------|-----------------------------------------------------------------------------------------------|
| Hypertension | I87.302 | ICD10 | Chronic venous hypertension (idiopathic) without complications of left lower extremity        |
| Hypertension | I87.303 | ICD10 | Chronic venous hypertension (idiopathic) without complications of bilateral lower extremity   |
| Hypertension | I87.309 | ICD10 | Chronic venous hypertension (idiopathic) without complications of unspecified lower extremity |
| Hypertension | I87.31  | ICD10 | Chronic venous hypertension (idiopathic) with ulcer                                           |
| Hypertension | I87.311 | ICD10 | Chronic venous hypertension (idiopathic) with ulcer of right lower extremity                  |
| Hypertension | I87.312 | ICD10 | Chronic venous hypertension (idiopathic) with ulcer of left lower extremity                   |
| Hypertension | I87.313 | ICD10 | Chronic venous hypertension (idiopathic) with ulcer of bilateral lower extremity              |
| Hypertension | I87.319 | ICD10 | Chronic venous hypertension (idiopathic) with ulcer of unspecified lower extremity            |
| Hypertension | I87.32  | ICD10 | Chronic venous hypertension (idiopathic) with inflammation                                    |
| Hypertension | I87.321 | ICD10 | Chronic venous hypertension w inflammation of r low extrem                                    |
| Hypertension | I87.322 | ICD10 | Chronic venous hypertension (idiopathic) with inflammation of left lower extremity            |
| Hypertension | I87.323 | ICD10 | Chronic venous hypertension (idiopathic) with inflammation of bilateral lower extremity       |
| Hypertension | I87.329 | ICD10 | Chronic venous hypertension w inflammation of unsp low extrm                                  |
| Hypertension | I87.33  | ICD10 | Chronic venous hypertension (idiopathic) with ulcer and inflammation                          |
| Hypertension | I87.331 | ICD10 | Chronic venous hypertension (idiopathic) with ulcer and inflammation of right lower extremity |
| Hypertension | I87.332 | ICD10 | Chronic venous hypertension (idiopathic) with ulcer and inflammation of left lower extremity  |

|              |         |       |                                                                                                     |
|--------------|---------|-------|-----------------------------------------------------------------------------------------------------|
| Hypertension | I87.333 | ICD10 | Chronic venous hypertension (idiopathic) with ulcer and inflammation of bilateral lower extremity   |
| Hypertension | I87.339 | ICD10 | Chronic venous hypertension (idiopathic) with ulcer and inflammation of unspecified lower extremity |
| Hypertension | I87.39  | ICD10 | Chronic venous hypertension (idiopathic) with other complications                                   |
| Hypertension | I87.391 | ICD10 | Chronic venous hypertension with other complications of lower extremity                             |
| Hypertension | I87.392 | ICD10 | Chronic venous hypertension with other complications of lower extremity                             |
| Hypertension | I87.393 | ICD10 | Chronic venous hypertension (idiopathic) with other complications of bilateral lower extremity      |
| Hypertension | I87.399 | ICD10 | Chronic venous hypertension (idiopathic) with other complications of unspecified lower extremity    |
| Hypertension | O10.0   | ICD10 | Pre-existing hypertension complicating pregnancy                                                    |
| Hypertension | O10.0   | ICD10 | Pre-existing essential hypertension complicating pregnancy                                          |
| Hypertension | O10.01  | ICD10 | Pre-existing essential hypertension complicating pregnancy                                          |
| Hypertension | O10.011 | ICD10 | Pre-existing essential hypertension complicating pregnancy                                          |
| Hypertension | O10.012 | ICD10 | Pre-existing essential hypertension complicating pregnancy                                          |
| Hypertension | O10.013 | ICD10 | Pre-existing essential hypertension complicating pregnancy                                          |
| Hypertension | O10.019 | ICD10 | Pre-existing essential hypertension complicating pregnancy                                          |
| Hypertension | O10.02  | ICD10 | Pre-existing essential hypertension complicating childbirth                                         |
| Hypertension | O10.03  | ICD10 | Pre-existing essential hypertension complicating the puerperium                                     |
| Hypertension | O10.1   | ICD10 | Pre-existing hypertensive heart disease complicating pregnancy                                      |
| Hypertension | O10.11  | ICD10 | Pre-existing hypertensive heart disease complicating pregnancy                                      |

|              |         |       |                                                                                   |
|--------------|---------|-------|-----------------------------------------------------------------------------------|
| Hypertension | O10.111 | ICD10 | Pre-existing hypertensive heart disease complicating pregnancy                    |
| Hypertension | O10.112 | ICD10 | Pre-existing hypertensive heart disease complicating pregnancy                    |
| Hypertension | O10.113 | ICD10 | Pre-existing hypertensive heart disease complicating pregnancy                    |
| Hypertension | O10.119 | ICD10 | Pre-existing hypertensive heart disease complicating pregnancy                    |
| Hypertension | O10.12  | ICD10 | Pre-existing hypertensive heart disease complicating childbirth                   |
| Hypertension | O10.13  | ICD10 | Pre-existing hypertensive heart disease complicating the puerperium               |
| Hypertension | O10.2   | ICD10 | Pre-existing hypertensive chronic kidney disease complicating pregnancy           |
| Hypertension | O10.21  | ICD10 | Pre-existing hypertensive chronic kidney disease complicating pregnancy           |
| Hypertension | O10.211 | ICD10 | Pre-existing hypertensive chronic kidney disease complicating pregnancy           |
| Hypertension | O10.212 | ICD10 | Pre-existing hypertensive chronic kidney disease complicating pregnancy           |
| Hypertension | O10.213 | ICD10 | Pre-existing hypertensive chronic kidney disease complicating pregnancy           |
| Hypertension | O10.219 | ICD10 | Pre-existing hypertensive chronic kidney disease complicating pregnancy           |
| Hypertension | O10.22  | ICD10 | Pre-existing hypertensive chronic kidney disease complicating childbirth          |
| Hypertension | O10.23  | ICD10 | Pre-existing hypertensive chronic kidney disease complicating the puerperium      |
| Hypertension | O10.3   | ICD10 | Pre-existing hypertensive heart and chronic kidney disease complicating pregnancy |
| Hypertension | O10.31  | ICD10 | Pre-existing hypertensive heart and chronic kidney disease complicating pregnancy |
| Hypertension | O10.311 | ICD10 | Pre-existing hypertensive heart and chronic kidney disease complicating pregnancy |
| Hypertension | O10.312 | ICD10 | Pre-existing hypertensive heart and chronic kidney disease complicating pregnancy |

|              |         |       |                                                                                        |
|--------------|---------|-------|----------------------------------------------------------------------------------------|
| Hypertension | O10.313 | ICD10 | Pre-existing hypertensive heart and chronic kidney disease complicating pregnancy      |
| Hypertension | O10.319 | ICD10 | Pre-existing hypertensive heart and chronic kidney disease complicating pregnancy      |
| Hypertension | O10.32  | ICD10 | Pre-existing hypertensive heart and chronic kidney disease complicating childbirth     |
| Hypertension | O10.33  | ICD10 | Pre-existing hypertensive heart and chronic kidney disease complicating the puerperium |
| Hypertension | O10.4   | ICD10 | Pre-existing secondary hypertension complicating pregnancy                             |
| Hypertension | O10.41  | ICD10 | Pre-existing secondary hypertension complicating pregnancy                             |
| Hypertension | O10.411 | ICD10 | Pre-existing secondary hypertension complicating pregnancy                             |
| Hypertension | O10.412 | ICD10 | Pre-existing secondary hypertension complicating pregnancy                             |
| Hypertension | O10.413 | ICD10 | Pre-existing secondary hypertension complicating pregnancy                             |
| Hypertension | O10.419 | ICD10 | Pre-existing secondary hypertension complicating pregnancy                             |
| Hypertension | O10.42  | ICD10 | Pre-existing secondary hypertension complicating childbirth                            |
| Hypertension | O10.43  | ICD10 | Pre-existing secondary hypertension complicating the puerperium                        |
| Hypertension | O10.9   | ICD10 | Unspecified pre-existing hypertension complicating pregnancy                           |
| Hypertension | O10.91  | ICD10 | Unspecified pre-existing hypertension complicating pregnancy                           |
| Hypertension | O10.911 | ICD10 | Unspecified pre-existing hypertension complicating pregnancy                           |
| Hypertension | O10.912 | ICD10 | Unspecified pre-existing hypertension complicating pregnancy                           |
| Hypertension | O10.913 | ICD10 | Unspecified pre-existing hypertension complicating pregnancy                           |
| Hypertension | O10.919 | ICD10 | Unspecified pre-existing hypertension complicating pregnancy                           |

|              |        |       |                                                                              |
|--------------|--------|-------|------------------------------------------------------------------------------|
| Hypertension | O10.92 | ICD10 | Unspecified pre-existing hypertension complicating childbirth                |
| Hypertension | O10.93 | ICD10 | Unspecified pre-existing hypertension complicating the puerperium            |
| Hypertension | O13    | ICD10 | Gestational [pregnancy-induced] hypertension without significant proteinuria |
| Hypertension | O13.1  | ICD10 | Gestational [pregnancy-induced] hypertension without significant proteinuria |
| Hypertension | O13.2  | ICD10 | Gestational [pregnancy-induced] hypertension without significant proteinuria |
| Hypertension | O13.3  | ICD10 | Gestational [pregnancy-induced] hypertension without significant proteinuria |
| Hypertension | O13.4  | ICD10 | Gestatnl htn without significant protein                                     |
| Hypertension | O13.5  | ICD10 | Gestatnl htn without significant protein                                     |
| Hypertension | O13.9  | ICD10 | Gestational [pregnancy-induced] hypertension without significant proteinuria |
| Hypertension | O16    | ICD10 | Unspecified maternal hypertension                                            |
| Hypertension | O16.1  | ICD10 | Unspecified maternal hypertension                                            |
| Hypertension | O16.2  | ICD10 | Unspecified maternal hypertension                                            |
| Hypertension | O16.3  | ICD10 | Unspecified maternal hypertension                                            |
| Hypertension | O16.4  | ICD10 | Unspecified maternal hypertension                                            |
| Hypertension | O16.5  | ICD10 | Unspecified maternal hypertension                                            |
| Hypertension | O16.9  | ICD10 | Unspecified maternal hypertension                                            |
| Stroke       | 430    | ICD9  | Subarachnoid hemorrhage                                                      |
| Stroke       | 430    | ICD9  | Subarachnoid hemorrhage **                                                   |
| Stroke       | 431    | ICD9  | Intracerebral hemorrhage                                                     |
| Stroke       | 431    | ICD9  | Intracerebral hemorrhage **                                                  |
| Stroke       | 432    | ICD9  | Other and unspecified intracranial hemorrhage                                |
| Stroke       | 432    | ICD9  | Nontraumatic extradural hemorrhage                                           |
| Stroke       | 432.1  | ICD9  | Subdural hemorrhage                                                          |
| Stroke       | 432.9  | ICD9  | Unspecified intracranial hemorrhage                                          |
| Stroke       | 433    | ICD9  | Occlusion and stenosis of precerebral arteries                               |
| Stroke       | 433    | ICD9  | Occlusion and stenosis of basilar artery                                     |



|        |        |      |                                                                       |
|--------|--------|------|-----------------------------------------------------------------------|
| Stroke | 433    | ICD9 | Occlusion and stenosis of basilar artery                              |
| Stroke | 433.01 | ICD9 | Occlusion and stenosis of basilar artery                              |
| Stroke | 433.1  | ICD9 | Occlusion and stenosis of carotid artery                              |
| Stroke | 433.1  | ICD9 | Occlusion and stenosis of carotid artery                              |
| Stroke | 433.11 | ICD9 | Occlusion and stenosis of carotid artery                              |
| Stroke | 433.2  | ICD9 | Occlusion and stenosis of vertebral artery                            |
| Stroke | 433.2  | ICD9 | Occlusion and stenosis of vertebral artery                            |
| Stroke | 433.21 | ICD9 | Occlusion and stenosis of vertebral artery                            |
| Stroke | 433.3  | ICD9 | Occlusion and stenosis of multiple and bilateral precerebral arteries |
| Stroke | 433.3  | ICD9 | Occlusion and stenosis of multiple and bilateral precerebral arteries |
| Stroke | 433.31 | ICD9 | Occlusion and stenosis of multiple and bilateral precerebral arteries |
| Stroke | 433.8  | ICD9 | Occlusion and stenosis of other specified precerebral artery          |
| Stroke | 433.8  | ICD9 | Occlusion and stenosis of other specified precerebral artery          |
| Stroke | 433.81 | ICD9 | Occlusion and stenosis of other specified precerebral artery          |
| Stroke | 433.9  | ICD9 | Occlusion and stenosis of unspecified precerebral artery              |
| Stroke | 433.9  | ICD9 | Occlusion and stenosis of unspecified precerebral artery              |
| Stroke | 433.91 | ICD9 | Unspecified precerebral artery                                        |
| Stroke | 434    | ICD9 | Occlusion of cerebral arteries                                        |
| Stroke | 434    | ICD9 | Cerebral thrombosis                                                   |
| Stroke | 434    | ICD9 | Cerebral thrombosis                                                   |
| Stroke | 434.01 | ICD9 | Cerebral thrombosis                                                   |
| Stroke | 434.1  | ICD9 | Cerebral embolism                                                     |
| Stroke | 434.1  | ICD9 | Cerebral embolism                                                     |
| Stroke | 434.11 | ICD9 | Cerebral embolism                                                     |
| Stroke | 434.9  | ICD9 | Cerebral artery occlusion                                             |
| Stroke | 434.9  | ICD9 | Cerebral artery occlusion                                             |
| Stroke | 434.91 | ICD9 | Cerebral artery occlusion                                             |
| Stroke | 437.1  | ICD9 | Other generalized ischemic cerebrovascular disease                    |

|        |         |       |                                                                       |
|--------|---------|-------|-----------------------------------------------------------------------|
| Stroke | I63     | ICD10 | Cerebral infarction                                                   |
| Stroke | I63.6   | ICD10 | Cerebral infarction due to cerebral venous thrombosis                 |
| Stroke | I63.42  | ICD10 | Cerebral infarction due to embolism of anterior cerebral artery       |
| Stroke | I63.12  | ICD10 | Cerebral infarction due to embolism of basilar artery                 |
| Stroke | I63.113 | ICD10 | Cerebral infarction due to embolism of bilateral vertebral arteries   |
| Stroke | I63.13  | ICD10 | Cerebral infarction due to embolism of carotid artery                 |
| Stroke | I63.44  | ICD10 | Cerebral infarction due to embolism of cerebellar artery              |
| Stroke | I63.4   | ICD10 | Cerebral infarction due to embolism of cerebral arteries              |
| Stroke | I63.422 | ICD10 | Cerebral infarction due to embolism of left anterior cerebral artery  |
| Stroke | I63.132 | ICD10 | Cerebral infarction due to embolism of left carotid artery            |
| Stroke | I63.442 | ICD10 | Cerebral infarction due to embolism of left cerebellar artery         |
| Stroke | I63.412 | ICD10 | Cerebral infarction due to embolism of left middle cerebral artery    |
| Stroke | I63.432 | ICD10 | Cerebral infarction due to embolism of left posterior cerebral artery |
| Stroke | I63.112 | ICD10 | Cerebral infarction due to embolism of left vertebral artery          |
| Stroke | I63.41  | ICD10 | Cerebral infarction due to embolism of middle cerebral artery         |
| Stroke | I63.49  | ICD10 | Cerebral infarction due to embolism of other cerebral artery          |
| Stroke | I63.19  | ICD10 | Cerebral infarction due to embolism of other precerebral artery       |
| Stroke | I63.43  | ICD10 | Cerebral infarction due to embolism of posterior cerebral artery      |
| Stroke | I63.1   | ICD10 | Cerebral infarction due to embolism of precerebral arteries           |
| Stroke | I63.421 | ICD10 | Cerebral infarction due to embolism of right anterior cerebral artery |

|        |         |       |                                                                              |
|--------|---------|-------|------------------------------------------------------------------------------|
| Stroke | I63.131 | ICD10 | Cerebral infarction due to embolism of right carotid artery                  |
| Stroke | I63.441 | ICD10 | Cerebral infarction due to embolism of right cerebellar artery               |
| Stroke | I63.411 | ICD10 | Cerebral infarction due to embolism of right middle cerebral artery          |
| Stroke | I63.431 | ICD10 | Cerebral infarction due to embolism of right posterior cerebral artery       |
| Stroke | I63.111 | ICD10 | Cerebral infarction due to embolism of right vertebral artery                |
| Stroke | I63.429 | ICD10 | Cerebral infarction due to embolism of unspecified anterior cerebral artery  |
| Stroke | I63.139 | ICD10 | Cerebral infarction due to embolism of unspecified carotid artery            |
| Stroke | I63.449 | ICD10 | Cerebral infarction due to embolism of unspecified cerebellar artery         |
| Stroke | I63.40  | ICD10 | Cerebral infarction due to embolism of unspecified cerebral artery           |
| Stroke | I63.419 | ICD10 | Cerebral infarction due to embolism of unspecified middle cerebral artery    |
| Stroke | I63.439 | ICD10 | Cerebral infarction due to embolism of unspecified posterior cerebral artery |
| Stroke | I63.10  | ICD10 | Cerebral infarction due to embolism of unspecified precerebral artery        |
| Stroke | I63.119 | ICD10 | Cerebral infarction due to embolism of unspecified vertebral artery          |
| Stroke | I63.11  | ICD10 | Cerebral infarction due to embolism of vertebral artery                      |
| Stroke | I63.32  | ICD10 | Cerebral infarction due to thrombosis of anterior cerebral artery            |
| Stroke | I63.02  | ICD10 | Cerebral infarction due to thrombosis of basilar artery                      |
| Stroke | I63.03  | ICD10 | Cerebral infarction due to thrombosis of carotid artery                      |
| Stroke | I63.34  | ICD10 | Cerebral infarction due to thrombosis of cerebellar artery                   |
| Stroke | I63.3   | ICD10 | Cerebral infarction due to thrombosis of cerebral arteries                   |
| Stroke | I63.322 | ICD10 | Cerebral infarction due to thrombosis of left anterior cerebral artery       |

|        |         |       |                                                                               |
|--------|---------|-------|-------------------------------------------------------------------------------|
| Stroke | I63.032 | ICD10 | Cerebral infarction due to thrombosis of left carotid artery                  |
| Stroke | I63.342 | ICD10 | Cerebral infarction due to thrombosis of left cerebellar artery               |
| Stroke | I63.312 | ICD10 | Cerebral infarction due to thrombosis of left middle cerebral artery          |
| Stroke | I63.332 | ICD10 | Cerebral infarction due to thrombosis of left posterior cerebral artery       |
| Stroke | I63.012 | ICD10 | Cerebral infarction due to thrombosis of left vertebral artery                |
| Stroke | I63.31  | ICD10 | Cerebral infarction due to thrombosis of middle cerebral artery               |
| Stroke | I63.39  | ICD10 | Cerebral infarction due to thrombosis of other cerebral artery                |
| Stroke | I63.09  | ICD10 | Cerebral infarction due to thrombosis of other precerebral artery             |
| Stroke | I63.33  | ICD10 | Cerebral infarction due to thrombosis of posterior cerebral artery            |
| Stroke | I63.0   | ICD10 | Cerebral infarction due to thrombosis of precerebral arteries                 |
| Stroke | I63.321 | ICD10 | Cerebral infarction due to thrombosis of right anterior cerebral artery       |
| Stroke | I63.031 | ICD10 | Cerebral infarction due to thrombosis of right carotid artery                 |
| Stroke | I63.341 | ICD10 | Cerebral infarction due to thrombosis of right cerebellar artery              |
| Stroke | I63.311 | ICD10 | Cerebral infarction due to thrombosis of right middle cerebral artery         |
| Stroke | I63.331 | ICD10 | Cerebral infarction due to thrombosis of right posterior cerebral artery      |
| Stroke | I63.011 | ICD10 | Cerebral infarction due to thrombosis of right vertebral artery               |
| Stroke | I63.329 | ICD10 | Cerebral infarction due to thrombosis of unspecified anterior cerebral artery |
| Stroke | I63.039 | ICD10 | Cerebral infarction due to thrombosis of unspecified carotid artery           |
| Stroke | I63.349 | ICD10 | Cerebral infarction due to thrombosis of unspecified cerebellar artery        |
| Stroke | I63.30  | ICD10 | Cerebral infarction due to thrombosis of unspecified cerebral artery          |

|        |         |       |                                                                                                       |
|--------|---------|-------|-------------------------------------------------------------------------------------------------------|
| Stroke | I63.319 | ICD10 | Cerebral infarction due to thrombosis of unspecified middle cerebral artery                           |
| Stroke | I63.339 | ICD10 | Cerebral infarction due to thrombosis of unspecified posterior cerebral artery                        |
| Stroke | I63.00  | ICD10 | Cerebral infarction due to thrombosis of unspecified precerebral artery                               |
| Stroke | I63.019 | ICD10 | Cerebral infarction due to thrombosis of unspecified vertebral artery                                 |
| Stroke | I63.01  | ICD10 | Cerebral infarction due to thrombosis of vertebral artery                                             |
| Stroke | I63.52  | ICD10 | Cerebral infarction due to unspecified occlusion or stenosis of anterior cerebral artery              |
| Stroke | I63.22  | ICD10 | Cerebral infarction due to unspecified occlusion or stenosis of basilar arteries                      |
| Stroke | I63.523 | ICD10 | Cerebral infarction due to unspecified occlusion or stenosis of bilateral anterior cerebral arteries  |
| Stroke | I63.233 | ICD10 | Cerebral infarction due to unspecified occlusion or stenosis of bilateral carotid arteries            |
| Stroke | I63.543 | ICD10 | Cerebral infarction due to unspecified occlusion or stenosis of bilateral cerebellar arteries         |
| Stroke | I63.513 | ICD10 | Cerebral infarction due to unspecified occlusion or stenosis of bilateral middle cerebral arteries    |
| Stroke | I63.533 | ICD10 | Cerebral infarction due to unspecified occlusion or stenosis of bilateral posterior cerebral arteries |
| Stroke | I63.213 | ICD10 | Cerebral infarction due to unspecified occlusion or stenosis of bilateral vertebral arteries          |
| Stroke | I63.23  | ICD10 | Cerebral infarction due to unspecified occlusion or stenosis of carotid arteries                      |
| Stroke | I63.54  | ICD10 | Cerebral infarction due to unspecified occlusion or stenosis of cerebellar artery                     |
| Stroke | I63.5   | ICD10 | Cerebral infarction due to unspecified occlusion or stenosis of cerebral arteries                     |

|        |         |       |                                                                                                |
|--------|---------|-------|------------------------------------------------------------------------------------------------|
| Stroke | I63.522 | ICD10 | Cerebral infarction due to unspecified occlusion or stenosis of left anterior cerebral artery  |
| Stroke | I63.232 | ICD10 | Cerebral infarction due to unspecified occlusion or stenosis of left carotid arteries          |
| Stroke | I63.542 | ICD10 | Cerebral infarction due to unspecified occlusion or stenosis of left cerebellar artery         |
| Stroke | I63.512 | ICD10 | Cerebral infarction due to unspecified occlusion or stenosis of left middle cerebral artery    |
| Stroke | I63.532 | ICD10 | Cerebral infarction due to unspecified occlusion or stenosis of left posterior cerebral artery |
| Stroke | I63.212 | ICD10 | Cerebral infarction due to unspecified occlusion or stenosis of left vertebral arteries        |
| Stroke | I63.51  | ICD10 | Cerebral infarction due to unspecified occlusion or stenosis of middle cerebral artery         |
| Stroke | I63.59  | ICD10 | Cerebral infarction due to unspecified occlusion or stenosis of other cerebral artery          |
| Stroke | I63.29  | ICD10 | Cerebral infarction due to unspecified occlusion or stenosis of other precerebral arteries     |
| Stroke | I63.53  | ICD10 | Cerebral infarction due to unspecified occlusion or stenosis of posterior cerebral artery      |
| Stroke | I63.2   | ICD10 | Cerebral infarction due to unspecified occlusion or stenosis of precerebral arteries           |
| Stroke | I63.521 | ICD10 | Cerebral infarction due to unspecified occlusion or stenosis of right anterior cerebral artery |
| Stroke | I63.231 | ICD10 | Cerebral infarction due to unspecified occlusion or stenosis of right carotid arteries         |

|        |         |       |                                                                                                       |
|--------|---------|-------|-------------------------------------------------------------------------------------------------------|
| Stroke | I63.541 | ICD10 | Cerebral infarction due to unspecified occlusion or stenosis of right cerebellar artery               |
| Stroke | I63.511 | ICD10 | Cerebral infarction due to unspecified occlusion or stenosis of right middle cerebral artery          |
| Stroke | I63.531 | ICD10 | Cerebral infarction due to unspecified occlusion or stenosis of right posterior cerebral artery       |
| Stroke | I63.211 | ICD10 | Cerebral infarction due to unspecified occlusion or stenosis of right vertebral arteries              |
| Stroke | I63.529 | ICD10 | Cerebral infarction due to unspecified occlusion or stenosis of unspecified anterior cerebral artery  |
| Stroke | I63.239 | ICD10 | Cerebral infarction due to unspecified occlusion or stenosis of unspecified carotid arteries          |
| Stroke | I63.549 | ICD10 | Cerebral infarction due to unspecified occlusion or stenosis of unspecified cerebellar artery         |
| Stroke | I63.50  | ICD10 | Cerebral infarction due to unspecified occlusion or stenosis of unspecified cerebral artery           |
| Stroke | I63.519 | ICD10 | Cerebral infarction due to unspecified occlusion or stenosis of unspecified middle cerebral artery    |
| Stroke | I63.539 | ICD10 | Cerebral infarction due to unspecified occlusion or stenosis of unspecified posterior cerebral artery |
| Stroke | I63.20  | ICD10 | Cerebral infarction due to unspecified occlusion or stenosis of unspecified precerebral arteries      |
| Stroke | I63.219 | ICD10 | Cerebral infarction due to unspecified occlusion or stenosis of unspecified vertebral arteries        |
| Stroke | I63.21  | ICD10 | Cerebral infarction due to unspecified occlusion or stenosis of vertebral arteries                    |
| Stroke | I63.9   | ICD10 | Cerebral infarction                                                                                   |
| Stroke | I63.423 | ICD10 | Cerebral infrc due to embolism of bi ant cerebral arteries                                            |

|        |         |       |                                                              |
|--------|---------|-------|--------------------------------------------------------------|
| Stroke | I63.413 | ICD10 | Cerebral infrc due to embolism of bi middle cerebral art     |
| Stroke | I63.433 | ICD10 | Cerebral infrc due to embolism of bi post cerebral arteries  |
| Stroke | I63.133 | ICD10 | Cerebral infrc due to embolism of bilateral carotid arteries |
| Stroke | I63.443 | ICD10 | Cerebral infrc due to embolism of bilateral cereblr arteries |
| Stroke | I63.323 | ICD10 | Cerebral infrc due to thombos of bi ant cerebral arteries    |
| Stroke | I63.313 | ICD10 | Cerebral infrc due to thombos of bi middle cerebral arteries |
| Stroke | I63.333 | ICD10 | Cerebral infrc to thombos of bi posterior cerebral arteries  |
| Stroke | I63.343 | ICD10 | Cerebral infrc to thrombosis of bilateral cereblr arteries   |
| Stroke | I63.8   | ICD10 | Other cerebral infarction                                    |
| Stroke | I61     | ICD10 | Nontraumatic intracerebral hemorrhage                        |
| Stroke | I61.3   | ICD10 | Nontraumatic intracerebral hemorrhage in brain stem          |
| Stroke | I61.4   | ICD10 | Nontraumatic intracerebral hemorrhage in cerebellum          |
| Stroke | I61.1   | ICD10 | Nontraumatic intracerebral hemorrhage in hemisphere          |
| Stroke | I61.0   | ICD10 | Nontraumatic intracerebral hemorrhage in hemisphere          |
| Stroke | I61.2   | ICD10 | Nontraumatic intracerebral hemorrhage in hemisphere          |
| Stroke | I61.5   | ICD10 | Nontraumatic intracerebral hemorrhage                        |
| Stroke | I61.6   | ICD10 | Nontraumatic intracerebral hemorrhage                        |
| Stroke | I61.9   | ICD10 | Nontraumatic intracerebral hemorrhage                        |
| Stroke | I61.8   | ICD10 | Other nontraumatic intracerebral hemorrhage                  |
| Stroke | I67.81  | ICD10 | Acute cerebrovascular insufficiency                          |



**STROBE 2007 (v4) checklist of items to be included in reports of observational studies in epidemiology\***  
**Checklist for cohort, case-control, and cross-sectional studies (combined)**

| Section/Topic             | Item # | Recommendation                                                                                                                                                                                                                                                                                                                                                                                                                                                         | Reported on page # |
|---------------------------|--------|------------------------------------------------------------------------------------------------------------------------------------------------------------------------------------------------------------------------------------------------------------------------------------------------------------------------------------------------------------------------------------------------------------------------------------------------------------------------|--------------------|
| Title and abstract        | 1      | (a) Indicate the study's design with a commonly used term in the title or the abstract                                                                                                                                                                                                                                                                                                                                                                                 | 1                  |
|                           |        | (b) Provide in the abstract an informative and balanced summary of what was done and what was found                                                                                                                                                                                                                                                                                                                                                                    | 3                  |
| <b>Introduction</b>       |        |                                                                                                                                                                                                                                                                                                                                                                                                                                                                        |                    |
| Background/rationale      | 2      | Explain the scientific background and rationale for the investigation being reported                                                                                                                                                                                                                                                                                                                                                                                   | 3                  |
| Objectives                | 3      | State specific objectives, including any pre-specified hypotheses                                                                                                                                                                                                                                                                                                                                                                                                      | 3                  |
| <b>Methods</b>            |        |                                                                                                                                                                                                                                                                                                                                                                                                                                                                        |                    |
| Study design              | 4      | Present key elements of study design early in the paper                                                                                                                                                                                                                                                                                                                                                                                                                | 4                  |
| Setting                   | 5      | Describe the setting, locations, and relevant dates, including periods of recruitment, exposure, follow-up, and data collection                                                                                                                                                                                                                                                                                                                                        | 4                  |
| Participants              | 6      | (a) <i>Cohort study</i> —Give the eligibility criteria, and the sources and methods of selection of participants. Describe methods of follow-up<br><i>Case-control study</i> —Give the eligibility criteria, and the sources and methods of case ascertainment and control selection. Give the rationale for the choice of cases and controls<br><i>Cross-sectional study</i> —Give the eligibility criteria, and the sources and methods of selection of participants | 4                  |
|                           |        | (b) <i>Cohort study</i> —For matched studies, give matching criteria and number of exposed and unexposed<br><i>Case-control study</i> —For matched studies, give matching criteria and the number of controls per case                                                                                                                                                                                                                                                 | 4                  |
| Variables                 | 7      | Clearly define all outcomes, exposures, predictors, potential confounders, and effect modifiers. Give diagnostic criteria, if applicable                                                                                                                                                                                                                                                                                                                               | 5                  |
| Data sources/ measurement | 8*     | For each variable of interest, give sources of data and details of methods of assessment (measurement). Describe comparability of assessment methods if there is more than one group                                                                                                                                                                                                                                                                                   | 4                  |
| Bias                      | 9      | Describe any efforts to address potential sources of bias                                                                                                                                                                                                                                                                                                                                                                                                              | 4                  |
| Study size                | 10     | Explain how the study size was arrived at                                                                                                                                                                                                                                                                                                                                                                                                                              | 4                  |
| Quantitative variables    | 11     | Explain how quantitative variables were handled in the analyses. If applicable, describe which groupings were chosen and why                                                                                                                                                                                                                                                                                                                                           | 4                  |
| Statistical methods       | 12     | (a) Describe all statistical methods, including those used to control for confounding                                                                                                                                                                                                                                                                                                                                                                                  | 4                  |
|                           |        | (b) Describe any methods used to examine subgroups and interactions                                                                                                                                                                                                                                                                                                                                                                                                    | 5                  |
|                           |        | (c) Explain how missing data were addressed                                                                                                                                                                                                                                                                                                                                                                                                                            | NA                 |
|                           |        | (d) <i>Cohort study</i> —If applicable, explain how loss to follow-up was addressed<br><i>Case-control study</i> —If applicable, explain how matching of cases and controls was addressed                                                                                                                                                                                                                                                                              | NA                 |

|                          |     |                                                                                                                                                                                                              |       |
|--------------------------|-----|--------------------------------------------------------------------------------------------------------------------------------------------------------------------------------------------------------------|-------|
|                          |     | <i>Cross-sectional study</i> —If applicable, describe analytical methods taking account of sampling strategy                                                                                                 |       |
|                          |     | (e) Describe any sensitivity analyses                                                                                                                                                                        | NA    |
| <b>Results</b>           |     |                                                                                                                                                                                                              |       |
| Participants             | 13* | (a) Report numbers of individuals at each stage of study—eg numbers potentially eligible, examined for eligibility, confirmed eligible, included in the study, completing follow-up, and analysed            | 5     |
|                          |     | (b) Give reasons for non-participation at each stage                                                                                                                                                         | NA    |
|                          |     | (c) Consider use of a flow diagram                                                                                                                                                                           | NA    |
| Descriptive data         | 14* | (a) Give characteristics of study participants (eg demographic, clinical, social) and information on exposures and potential confounders                                                                     | 5     |
|                          |     | (b) Indicate number of participants with missing data for each variable of interest                                                                                                                          | 5     |
|                          |     | (c) <i>Cohort study</i> —Summarise follow-up time (eg, average and total amount)                                                                                                                             | 5     |
| Outcome data             | 15* | <i>Cohort study</i> —Report numbers of outcome events or summary measures over time                                                                                                                          |       |
|                          |     | <i>Case-control study</i> —Report numbers in each exposure category, or summary measures of exposure                                                                                                         | 5     |
|                          |     | <i>Cross-sectional study</i> —Report numbers of outcome events or summary measures                                                                                                                           |       |
| Main results             | 16  | (a) Give unadjusted estimates and, if applicable, confounder-adjusted estimates and their precision (eg, 95% confidence interval). Make clear which confounders were adjusted for and why they were included | 10-19 |
|                          |     | (b) Report category boundaries when continuous variables were categorized                                                                                                                                    | 10-19 |
|                          |     | (c) If relevant, consider translating estimates of relative risk into absolute risk for a meaningful time period                                                                                             | NA    |
| Other analyses           | 17  | Report other analyses done—eg analyses of subgroups and interactions, and sensitivity analyses                                                                                                               | NA    |
| <b>Discussion</b>        |     |                                                                                                                                                                                                              |       |
| Key results              | 18  | Summarise key results with reference to study objectives                                                                                                                                                     | 7-9   |
| Limitations              | 19  | Discuss limitations of the study, taking into account sources of potential bias or imprecision. Discuss both direction and magnitude of any potential bias                                                   | 8-9   |
| Interpretation           | 20  | Give a cautious overall interpretation of results considering objectives, limitations, multiplicity of analyses, results from similar studies, and other relevant evidence                                   | 9     |
| Generalisability         | 21  | Discuss the generalisability (external validity) of the study results                                                                                                                                        | 9     |
| <b>Other information</b> |     |                                                                                                                                                                                                              |       |
| Funding                  | 22  | Give the source of funding and the role of the funders for the present study and, if applicable, for the original study on which the present article is based                                                | 2     |

\*Give information separately for cases and controls in case-control studies and, if applicable, for exposed and unexposed groups in cohort and cross-sectional studies.

**Note:** An Explanation and Elaboration article discusses each checklist item and gives methodological background and published examples of transparent reporting. The STROBE checklist is best used in conjunction with this article (freely available on the Web sites of PLoS Medicine at <http://www.plosmedicine.org/>, Annals of Internal Medicine at <http://www.annals.org/>, and Epidemiology at <http://www.epidem.com/>). Information on the STROBE Initiative is available at [www.strobe-statement.org](http://www.strobe-statement.org).

# BMJ Open

## Retrospective Cohort Study of Clinical Characteristics of 2,199 Hospitalized COVID-19 Patients in New York City

|                               |                                                                                                                                                                                                                                                                                                                                                                                                                                                                                                                                                                                                                                                                                                                                                                                                                                                                                                                                                                                                                                                                                                                                                                                                                                                                                                                                                                                                                                                                                                                                                                                                                                                                                                                                                                                                                                                                                                                                                                                                                                                                                                                                                                                                                                                                                                                                                                                                                                                                                                                                                                                                                                                                                                                                                                                                                                   |
|-------------------------------|-----------------------------------------------------------------------------------------------------------------------------------------------------------------------------------------------------------------------------------------------------------------------------------------------------------------------------------------------------------------------------------------------------------------------------------------------------------------------------------------------------------------------------------------------------------------------------------------------------------------------------------------------------------------------------------------------------------------------------------------------------------------------------------------------------------------------------------------------------------------------------------------------------------------------------------------------------------------------------------------------------------------------------------------------------------------------------------------------------------------------------------------------------------------------------------------------------------------------------------------------------------------------------------------------------------------------------------------------------------------------------------------------------------------------------------------------------------------------------------------------------------------------------------------------------------------------------------------------------------------------------------------------------------------------------------------------------------------------------------------------------------------------------------------------------------------------------------------------------------------------------------------------------------------------------------------------------------------------------------------------------------------------------------------------------------------------------------------------------------------------------------------------------------------------------------------------------------------------------------------------------------------------------------------------------------------------------------------------------------------------------------------------------------------------------------------------------------------------------------------------------------------------------------------------------------------------------------------------------------------------------------------------------------------------------------------------------------------------------------------------------------------------------------------------------------------------------------|
| Journal:                      | <i>BMJ Open</i>                                                                                                                                                                                                                                                                                                                                                                                                                                                                                                                                                                                                                                                                                                                                                                                                                                                                                                                                                                                                                                                                                                                                                                                                                                                                                                                                                                                                                                                                                                                                                                                                                                                                                                                                                                                                                                                                                                                                                                                                                                                                                                                                                                                                                                                                                                                                                                                                                                                                                                                                                                                                                                                                                                                                                                                                                   |
| Manuscript ID                 | bmjopen-2020-040736.R1                                                                                                                                                                                                                                                                                                                                                                                                                                                                                                                                                                                                                                                                                                                                                                                                                                                                                                                                                                                                                                                                                                                                                                                                                                                                                                                                                                                                                                                                                                                                                                                                                                                                                                                                                                                                                                                                                                                                                                                                                                                                                                                                                                                                                                                                                                                                                                                                                                                                                                                                                                                                                                                                                                                                                                                                            |
| Article Type:                 | Original research                                                                                                                                                                                                                                                                                                                                                                                                                                                                                                                                                                                                                                                                                                                                                                                                                                                                                                                                                                                                                                                                                                                                                                                                                                                                                                                                                                                                                                                                                                                                                                                                                                                                                                                                                                                                                                                                                                                                                                                                                                                                                                                                                                                                                                                                                                                                                                                                                                                                                                                                                                                                                                                                                                                                                                                                                 |
| Date Submitted by the Author: | 30-Sep-2020                                                                                                                                                                                                                                                                                                                                                                                                                                                                                                                                                                                                                                                                                                                                                                                                                                                                                                                                                                                                                                                                                                                                                                                                                                                                                                                                                                                                                                                                                                                                                                                                                                                                                                                                                                                                                                                                                                                                                                                                                                                                                                                                                                                                                                                                                                                                                                                                                                                                                                                                                                                                                                                                                                                                                                                                                       |
| Complete List of Authors:     | <p>Paranjpe, Ishan; Icahn School of Medicine at Mount Sinai, The Hasso Plattner Institute for Digital Health at Mount Sinai<br/> Russak, Adam; Icahn School of Medicine at Mount Sinai, The Hasso Plattner Institute for Digital Health at Mount Sinai; Icahn School of Medicine at Mount Sinai, Department of Internal Medicine<br/> De Freitas, Jessica; Icahn School of Medicine at Mount Sinai, The Hasso Plattner Institute for Digital Health at Mount Sinai; Icahn School of Medicine at Mount Sinai Department of Genetics and Genomic Sciences<br/> Lala, Anuradha; Icahn School of Medicine at Mount Sinai, The Zena and Michael A. Wiener Cardiovascular Institute; Icahn School of Medicine at Mount Sinai, Department of Population Health Science and Policy<br/> Miotto, Riccardo; Icahn School of Medicine at Mount Sinai, The Hasso Plattner Institute for Digital Health at Mount Sinai; Icahn School of Medicine at Mount Sinai Department of Genetics and Genomic Sciences<br/> Vaid, Akhil; Icahn School of Medicine at Mount Sinai, The Hasso Plattner Institute for Digital Health at Mount Sinai; Icahn School of Medicine at Mount Sinai Department of Genetics and Genomic Sciences<br/> Johnson, Kipp; Icahn School of Medicine at Mount Sinai, The Hasso Plattner Institute for Digital Health at Mount Sinai; Icahn School of Medicine at Mount Sinai Department of Genetics and Genomic Sciences<br/> Danieletto, Matteo; Icahn School of Medicine at Mount Sinai, The Hasso Plattner Institute for Digital Health at Mount Sinai; Icahn School of Medicine at Mount Sinai Department of Genetics and Genomic Sciences<br/> Golden, Eddy; Icahn School of Medicine at Mount Sinai, The Hasso Plattner Institute for Digital Health at Mount Sinai; Icahn School of Medicine at Mount Sinai Department of Genetics and Genomic Sciences<br/> Meyer, Dara; Icahn School of Medicine at Mount Sinai Department of Genetics and Genomic Sciences<br/> Singh, Manbir; Icahn School of Medicine at Mount Sinai, The Hasso Plattner Institute for Digital Health at Mount Sinai<br/> Somani, Sulaiman; Icahn School of Medicine at Mount Sinai, The Hasso Plattner Institute for Digital Health at Mount Sinai<br/> Kapoor, Arjun; Icahn School of Medicine at Mount Sinai, The Hasso Plattner Institute for Digital Health at Mount Sinai<br/> O'Hagan, Ross; Icahn School of Medicine at Mount Sinai, The Hasso Plattner Institute for Digital Health at Mount Sinai<br/> Manna, Sayan; Icahn School of Medicine at Mount Sinai, The Hasso Plattner Institute for Digital Health at Mount Sinai<br/> Nangia, Udit; Icahn School of Medicine at Mount Sinai, The Hasso Plattner Institute for Digital Health at Mount Sinai<br/> Jaladanki, Suraj; Icahn School of Medicine at Mount Sinai, The Hasso</p> |

|    |                                                                           |
|----|---------------------------------------------------------------------------|
| 1  |                                                                           |
| 2  |                                                                           |
| 3  |                                                                           |
| 4  | Plattner Institute for Digital Health at Mount Sinai                      |
| 5  | O'Reilly, Paul; Icahn School of Medicine at Mount Sinai Department of     |
| 6  | Genetics and Genomic Sciences; Icahn School of Medicine at Mount          |
| 7  | Sinai, The Pamela Sklar Division of Psychiatric Genomics                  |
| 8  | Huckins, Laura; Icahn School of Medicine at Mount Sinai Department of     |
| 9  | Genetics and Genomic Sciences; Icahn School of Medicine at Mount          |
| 10 | Sinai, The Pamela Sklar Division of Psychiatric Genomics                  |
| 11 | Glowe, Patricia; Icahn School of Medicine at Mount Sinai, The Hasso       |
| 12 | Plattner Institute for Digital Health at Mount Sinai; Icahn School of     |
| 13 | Medicine at Mount Sinai Department of Genetics and Genomic Sciences       |
| 14 | Kia, Arash; Icahn School of Medicine at Mount Sinai, Department of        |
| 15 | Population Health Science and Policy; Icahn School of Medicine at Mount   |
| 16 | Sinai, Institute for Healthcare Delivery Science                          |
| 17 | Timsina, Prem; Icahn School of Medicine at Mount Sinai, Department of     |
| 18 | Population Health Science and Policy; Icahn School of Medicine at Mount   |
| 19 | Sinai, Institute for Healthcare Delivery Science                          |
| 20 | Freeman, Robert; Icahn School of Medicine at Mount Sinai, Department      |
| 21 | of Population Health Science and Policy; Icahn School of Medicine at      |
| 22 | Mount Sinai, Institute for Healthcare Delivery Science                    |
| 23 | Levin, Matthew; Icahn School of Medicine at Mount Sinai Department of     |
| 24 | Genetics and Genomic Sciences; Icahn School of Medicine at Mount          |
| 25 | Sinai, Icahn Institute for Data Science and Genomic Technology,           |
| 26 | Jhang, Jeffrey; Icahn School of Medicine at Mount Sinai, Department of    |
| 27 | Pathology, Molecular and Cell-Based Medicine                              |
| 28 | Firpo, Adolfo; Icahn School of Medicine at Mount Sinai, Department of     |
| 29 | Pathology, Molecular and Cell-Based Medicine                              |
| 30 | Kovatch, Patricia; Icahn School of Medicine at Mount Sinai; Mount Sinai   |
| 31 | Health System, Mount Sinai Data Warehouse                                 |
| 32 | Finkelstein, Joseph; Icahn School of Medicine at Mount Sinai,             |
| 33 | Department of Population Health Science and Policy                        |
| 34 | Aberg, Judith; Icahn School of Medicine at Mount Sinai, Division of       |
| 35 | Infectious Diseases; Icahn School of Medicine at Mount Sinai Department   |
| 36 | of Medicine                                                               |
| 37 | Bagiella, Emilia; Icahn School of Medicine at Mount Sinai, The Zena and   |
| 38 | Michael A. Wiener Cardiovascular Institute; Icahn School of Medicine at   |
| 39 | Mount Sinai, Department of Population Health Science and Policy           |
| 40 | Horowitz, Carol; Icahn School of Medicine at Mount Sinai, Department of   |
| 41 | Population Health Science and Policy; Icahn School of Medicine at Mount   |
| 42 | Sinai Department of Medicine                                              |
| 43 | Murphy, Barbara; Icahn School of Medicine at Mount Sinai Department of    |
| 44 | Medicine                                                                  |
| 45 | Fayad, Zahi; Icahn School of Medicine at Mount Sinai BioMedical           |
| 46 | Engineering and Imaging Institute; Icahn School of Medicine at Mount      |
| 47 | Sinai, Department of Radiology                                            |
| 48 | Narula, Jagat; Icahn School of Medicine at Mount Sinai Department of      |
| 49 | Medicine; Icahn School of Medicine at Mount Sinai, Department of          |
| 50 | Cardiology                                                                |
| 51 | Nestler, Eric; Icahn School of Medicine at Mount Sinai Friedman Brain     |
| 52 | Institute; Icahn School of Medicine at Mount Sinai, The Nash Family       |
| 53 | Department of Neuroscience                                                |
| 54 | Fuster, V; Zena and Michael A. Wiener Cardiovascular Institute and        |
| 55 | Marie-Josée and Henry R. Kravis Center for Cardiovascular Health, Icahn   |
| 56 | School of Medicine at Mount Sinai, New York, NY, USA, Department of       |
| 57 | Medicine, Division of Cardiology                                          |
| 58 | Cordon-Cardo, Carlos; Icahn School of Medicine at Mount Sinai,            |
| 59 | Department of Pathology, Molecular and Cell-Based Medicine                |
| 60 | Charney, Dennis ; Icahn School of Medicine at Mount Sinai Department      |
|    | of Psychiatry; Icahn School of Medicine at Mount Sinai, The Office of the |
|    | Dean                                                                      |
|    | Reich, David; Icahn School of Medicine at Mount Sinai Department of       |
|    | Anesthesiology Perioperative and Pain Medicine                            |

|                                 |                                                                                                                                                                                                                                                                                                                                                                                                                                                                                                                                                                                                                                                                                                                                                                                                                                                                                                                                                                            |
|---------------------------------|----------------------------------------------------------------------------------------------------------------------------------------------------------------------------------------------------------------------------------------------------------------------------------------------------------------------------------------------------------------------------------------------------------------------------------------------------------------------------------------------------------------------------------------------------------------------------------------------------------------------------------------------------------------------------------------------------------------------------------------------------------------------------------------------------------------------------------------------------------------------------------------------------------------------------------------------------------------------------|
|                                 | Just, Allan; Icahn School of Medicine at Mount Sinai Department of Environmental Medicine and Public Health; Icahn School of Medicine at Mount Sinai, Institute for Exposomic Research<br>Bottinger, Erwin; Icahn School of Medicine at Mount Sinai, The Hasso Plattner Institute for Digital Health at Mount Sinai<br>Charney, Alexander; Icahn School of Medicine at Mount Sinai Department of Genetics and Genomic Sciences; Icahn School of Medicine at Mount Sinai, The Pamela Sklar Division of Psychiatric Genomics<br>Glicksberg, Benjamin; Icahn School of Medicine at Mount Sinai Department of Genetics and Genomic Sciences, Genetics and Genomics Sciences; Icahn School of Medicine at Mount Sinai, The Hasso Plattner Institute for Digital Health at Mount Sinai<br>Nadkarni, GN ; Icahn School of Medicine at Mount Sinai, The Hasso Plattner Institute for Digital Health at Mount Sinai; Icahn School of Medicine at Mount Sinai Department of Medicine |
| <b>Primary Subject Heading</b>: | Infectious diseases                                                                                                                                                                                                                                                                                                                                                                                                                                                                                                                                                                                                                                                                                                                                                                                                                                                                                                                                                        |
| Secondary Subject Heading:      | Infectious diseases                                                                                                                                                                                                                                                                                                                                                                                                                                                                                                                                                                                                                                                                                                                                                                                                                                                                                                                                                        |
| Keywords:                       | INFECTIOUS DISEASES, Public health < INFECTIOUS DISEASES, INTERNAL MEDICINE                                                                                                                                                                                                                                                                                                                                                                                                                                                                                                                                                                                                                                                                                                                                                                                                                                                                                                |
|                                 |                                                                                                                                                                                                                                                                                                                                                                                                                                                                                                                                                                                                                                                                                                                                                                                                                                                                                                                                                                            |

SCHOLARONE™  
Manuscripts

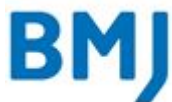

I, the Submitting Author has the right to grant and does grant on behalf of all authors of the Work (as defined in the below author licence), an exclusive licence and/or a non-exclusive licence for contributions from authors who are: i) UK Crown employees; ii) where BMJ has agreed a CC-BY licence shall apply, and/or iii) in accordance with the terms applicable for US Federal Government officers or employees acting as part of their official duties; on a worldwide, perpetual, irrevocable, royalty-free basis to BMJ Publishing Group Ltd ("BMJ") its licensees and where the relevant Journal is co-owned by BMJ to the co-owners of the Journal, to publish the Work in this journal and any other BMJ products and to exploit all rights, as set out in our [licence](#).

The Submitting Author accepts and understands that any supply made under these terms is made by BMJ to the Submitting Author unless you are acting as an employee on behalf of your employer or a postgraduate student of an affiliated institution which is paying any applicable article publishing charge ("APC") for Open Access articles. Where the Submitting Author wishes to make the Work available on an Open Access basis (and intends to pay the relevant APC), the terms of reuse of such Open Access shall be governed by a Creative Commons licence – details of these licences and which [Creative Commons](#) licence will apply to this Work are set out in our licence referred to above.

Other than as permitted in any relevant BMJ Author's Self Archiving Policies, I confirm this Work has not been accepted for publication elsewhere, is not being considered for publication elsewhere and does not duplicate material already published. I confirm all authors consent to publication of this Work and authorise the granting of this licence.

**Title:** Retrospective Cohort Study of Clinical Characteristics of 2,199 Hospitalized COVID-19 Patients in New York City

**Authors:**

Ishan Paranjpe, BS<sup>1+</sup>, Adam J Russak, MD<sup>1,2+</sup>, Jessica K De Freitas, BS<sup>1,3+</sup>, Anuradha Lala, MD<sup>4,5+</sup>, Riccardo Miotto, PhD<sup>1,3</sup>, Akhil Vaid, MD<sup>1,3</sup>, Kipp W Johnson, PhD<sup>1,3</sup>, Matteo Danieletto, PhD<sup>1,3</sup>, Eddy Golden, BS<sup>1,3</sup>, Dara Meyer, BS<sup>3</sup>, Manbir Singh, BS<sup>1</sup>, Sulaiman Somani, BS<sup>1</sup>, Arjun Kapoor, MA<sup>1</sup>, Ross O'Hagan, BS<sup>1</sup>, Sayan Manna, BS<sup>1</sup>, Udit Nangia, BS<sup>1</sup>, Suraj Jaladanki, BS<sup>1</sup>, Paul F O'Reilly, PhD<sup>3,6,7</sup>, Laura M Huckins, PhD<sup>3,6,7</sup>, Patricia Glowe, BS<sup>1,3</sup>, Arash Kia, PhD<sup>5,8</sup>, Prem Timsina, PhD<sup>5,8</sup>, Robert M Freeman, MS<sup>5,8</sup>, Matthew A Levin, MD<sup>3,5,8,10</sup>, Jeffrey Jhang, MD<sup>9</sup>, Adolfo Firpo, MD<sup>9</sup>, Patricia Kovatch, PhD<sup>11</sup>, Joseph Finkelstein, PhD<sup>5</sup>, Judith A Aberg, MD<sup>12,13</sup>, Emilia Bagiella, PhD<sup>4,5</sup>, Carol R Horowitz, PhD<sup>5,13</sup>, Barbara Murphy, MD<sup>13</sup>, Zahi A Fayad, PhD<sup>15,16</sup>, Jagat Narula, MD PhD<sup>13,17</sup>, Eric J Nestler, MD PhD<sup>18,19</sup>, Valentin Fuster, MD PhD<sup>4,17</sup>, Carlos Cordon-Cardo, MD PhD<sup>9</sup>, Dennis S Charney, MD PhD<sup>20</sup>, David L Reich, MD<sup>21</sup>, Allan C Just, PhD<sup>22,23</sup>, Erwin P Bottinger, MD<sup>1\*</sup>, Alexander W Charney, MD PhD<sup>3,6,7,\*</sup>, Benjamin S Glicksberg, PhD<sup>1,3,6\*</sup>, Girish N Nadkarni, MD<sup>1,13,24\*</sup>, on behalf of the Mount Sinai COVID Informatics Center (MSCIC)

**Affiliations:**

1. The Hasso Plattner Institute for Digital Health at Mount Sinai,
2. Department of Internal Medicine,
3. Department of Genetics and Genomic Sciences,
4. The Zena and Michael A. Wiener Cardiovascular Institute,
5. Department of Population Health Science and Policy,
6. The Pamela Sklar Division of Psychiatric Genomics,
7. The Department of Psychiatry,
8. Institute for Healthcare Delivery Science,
9. Department of Pathology, Molecular and Cell-Based Medicine
10. Icahn Institute for Data Science and Genomic Technology,
11. Mount Sinai Data Warehouse,
12. Division of Infectious Diseases,
13. Department of Medicine,
14. The Charles Bronfman Institute for Personalized Medicine,
15. The BioMedical Engineering and Imaging Institute,
16. Department of Radiology,
17. Department of Cardiology,
18. The Nash Family Department of Neuroscience,
19. The Friedman Brain Institute,
20. The Office of the Dean,
21. Department of Anesthesiology, Perioperative and Pain Medicine,
22. Department of Environmental Medicine and Public Health,
23. Institute for Exposomic Research,
24. The Charles Bronfman Institute for Personalized Medicine, Icahn School of Medicine at Mount Sinai

1  
2  
3 + These authors contributed equally

4  
5 \* These authors jointly supervised this work

6  
7 **Correspondence:**

8  
9  
10 Please address correspondence to:

11  
12  
13 Ishan Paranjpe  
14 Ishan.paranjpe@icahn.mssm.edu  
15

16  
17  
18 **Words: 3307**

19  
20  
21 **Funding:**

22 This work was Supported by U54 TR001433-05, National Center for Advancing  
23 Translational Sciences, National Institutes of Health.  
24  
25  
26  
27  
28  
29  
30  
31  
32

33  
34 **ABSTRACT**

35  
36  
37 **Objective:**

38 The coronavirus 2019 (COVID-19) pandemic is a global public health crisis, with over  
39 33 million cases and 999,000 deaths worldwide. Data are needed regarding the clinical  
40 course of hospitalized patients, particularly in the United States.

41 We aimed to compare clinical characteristic of COVID-19 patients who had in-hospital  
42 mortality with those who were discharged alive.  
43  
44

45 **Design:** Demographic, clinical, and outcomes data for patients admitted to five Mount  
46 Sinai Health System hospitals with confirmed COVID-19 between February 27 and April  
47 2, 2020 were identified through institutional electronic health records. We performed a  
48 retrospective comparative analysis of patients who had in-hospital mortality or were  
49 discharged alive.  
50

51  
52 **Setting:**

53 All patients were admitted to the Mount Sinai Health System, a large quaternary care  
54 urban hospital system.  
55  
56  
57  
58  
59  
60



**Participants:**

Participants over the age of 18 years were included.

**Primary Outcomes:**

We investigated in-hospital mortality during the study period.

**Results**

A total of 2,199 patients with COVID-19 were hospitalized during the study period. As of April 2<sup>nd</sup>, 1,121 (51%) patients remained hospitalized, and 1,078 (49%) completed their hospital course. Of the latter, the overall mortality was 29%, and 36% required intensive care. The median age was 65 years overall and 75 years in those who died. Pre-existing conditions were present in 65% of those who died and 46% of those discharged. In those who died, the admission median lymphocyte percentage was 11.7%, D-dimer was 2.4 ug/ml, C-reactive protein was 162 mg/L, and procalcitonin was 0.44 ng/mL. In those discharged, the admission median lymphocyte percentage was 16.6%, D-dimer was 0.93 ug/ml, C-reactive protein was 79 mg/L, and procalcitonin was 0.09 ng/mL.

**Conclusions**

In our cohort of hospitalized patients, requirement of intensive care and mortality were high. Patients who died typically had more pre-existing conditions and greater perturbations in inflammatory markers as compared to those who were discharged.

**Strengths and limitations of this study:**

- Our cohort includes greater racial diversity as compared to previously published work
- Largest hospitalized cohort of COVID-19 patients in New York City
- Limited by lack of access to clinical notes
- Our study is limited by the short followup time period
- Our study is limited by high censoring rate

**INTRODUCTION**

The Coronavirus disease (COVID-19) pandemic, caused by severe acute respiratory syndrome coronavirus-2 (SARS-CoV-2), has held the world at a standstill with its virulence. As of September 28, 2020, over 33 million people have been affected, and more than 999,000 patients have died worldwide<sup>1</sup>. In addition to being highly contagious, the disease manifestations and clinical course are variable, spanning from asymptomatic status to severe acute respiratory distress syndrome with multiorgan failure and death<sup>2,3</sup>, acute kidney injury<sup>4,5</sup>, acute myocardial injury<sup>6</sup>, and coagulopathy<sup>7-11</sup>.

Reports from China and Italy provided early data on disease presentation and management<sup>12-14</sup> but also revealed varying geographic disease expressions. Nearly one-third of the world's cases are now in the United States (US), and with nearly one-

1  
2  
3 third of those cases located in New York, it represents the current epicenter of the  
4 COVID-19 pandemic<sup>15</sup>.  
5

6  
7 As the number of cases continues to climb, hospitals are being stretched well-beyond  
8 capacity while facing challenges of insufficient personal protective equipment (PPE),  
9 ventilators, and workforce. Thus, understanding the clinical course of hospitalized  
10 COVID-19 patients is critical not only for providing optimal patient care but also to  
11 inform resource management in other locations across the US likely to experience  
12 similar case surges<sup>16</sup>. Data specifically examining differences in admission laboratory  
13 data in patients who died as compared to those who were ultimately discharged is  
14 lacking.  
15

16  
17 The Mount Sinai Healthcare System (MSHS) is the largest academic health system in  
18 New York City and serves as an ideal platform to better understand the evolving  
19 landscape of COVID-19 across a diverse population. Here, we present the largest case  
20 series of patients hospitalized with laboratory confirmed COVID-19 to date in the US.  
21  
22

## 23 **METHODS**

### 24 **Patient involvement**

25 Patients and the public were not directly involved in the study design or implementation.  
26  
27

### 28 **Study Population**

29 The MSHS serves a large, racially and ethnically diverse patient population. In this  
30 study, patient data came from 5 major hospitals: the Mount Sinai Hospital located in  
31 East Harlem, Manhattan; Mount Sinai Morningside located in Morningside Heights,  
32 Manhattan; Mount Sinai West located in Midtown and the West Side, Manhattan; Mount  
33 Sinai Brooklyn located in Midwood, Brooklyn; and Mount Sinai Queens located in  
34 Astoria, Queens. We included patients who were at least 18 years old, had a laboratory-  
35 confirmed COVID-19 infection, and were admitted to any of the aforementioned 5  
36 MSHS hospitals between February 27 and 12 a.m. April 2, 2020 (time of data freeze). A  
37 confirmed case of COVID-19 was defined by a positive reverse transcriptase  
38 polymerase chain reaction (RT-PCR) assay of a specimen collected via nasopharyngeal  
39 swab. The Mount Sinai Institutional Review Board approved this research under a broad  
40 regulatory protocol allowing for analysis of limited patient-level data.  
41  
42  
43

### 44 Detection of Viral RNA

45 Nasopharyngeal swab specimens were taken from all patients and placed in 120-140  
46 µL viral transport media (VTM). Ribonucleic acid (RNA) was purified from specimens  
47 using either the Qiacube Connect (Qiagen), QIAamp Viral RNA mini kit (Qiagen), or the  
48 EZ1 DSP Virus kit (Qiagen). SARS-CoV-2 RNA was detected using the qualitative  
49 cobas® SARS-CoV-2 kit using the cobas® 6800 system. For detection, a two-target  
50 reverse transcriptase polymerase chain reaction (RT-PCR) using 1) SARS-CoV-2  
51 specific primers and 2) pan-sarbecovirus primers as included in the cobas® master mix.  
52 All assays were performed in a CLIA certified high complexity laboratory at the Mount  
53 Sinai Health System.  
54  
55  
56  
57  
58  
59  
60

## Data Collection

The dataset was obtained from different sources and aggregated by the New York Covid Informatics Taskforce (NYCIT) (Further description of NYCIT is provided in Supplementary Material). We obtained demographics, diagnosis codes (International Classification of Diseases-9/10-Clinical Modification (ICD-9/10-CM) codes and procedures, as well as vital signs and laboratory measurements during hospitalization. Demographics included age, sex, and language, as well as race and ethnicity in the electronic health records. Racial groups included White, Black or African American, Asian, Pacific Islander, Other, and Unknown. Ethnic groups included Non-Hispanic/Latino, Hispanic/Latino, or Unknown. All vital signs and laboratory values were obtained as part of indicated clinical care.

## Definitions of Pre-existing Conditions

We defined a pre-existing condition as the presence of diagnosis codes associated with specific diseases. Diagnoses and corresponding ICD codes are provided in **Supplemental Table 1**.

## Definitions of Outcomes

We assessed in-hospital mortality and admission to intensive care.

## Statistical Analysis

Results are reported as medians and interquartile ranges or means and standard deviations, as appropriate. Categorical variables were summarized as counts and percentages. Statistical significance was evaluated using a Wilcoxon test for continuous variables and a Fisher-exact test for categorical variables. We visualized length of stay (LOS) using a cumulative incidence function with competing risks for mutually exclusive events of in-hospital mortality or discharge. Patients who were still hospitalized at the time of data freeze were regarded as having a censored LOS. We assumed censored observations from patients with ongoing hospitalization will not exceed the longest LOS in our dataset when calculating the restricted mean LOS. No imputation was made for missing data. Analysis was performed with R<sup>17</sup>.

## Data Availability

**Please contact authors for information on data availability.**

## RESULTS

A consort diagram of included patients and outcomes is depicted in **Supplementary Figure 1**.

### Demographic and Clinical Characteristics

From February 27 to April 2, 2020, 2,199 COVID-19 positive patients were hospitalized at one of five MSHS New York City hospitals. At the time of writing this report, 1,121 (51%) patients remained hospitalized and 1,078 (49%) completed their hospital course,

with 768 discharges and 310 deaths. **Figure 1** details the number of patients admitted to the hospital per day and the total number of patients admitted cumulatively over time. During the study period, the trend of hospital admissions per day consistently increased.

Patient demographics, pre-existing conditions as well as vital signs and laboratory values at the time of admission are displayed in Table 1. Median age was 65 years with only 3% of patients less than 30 years and 36% over 70 years. The proportion of men was higher (59%) than women (41%) and 25% had their race identified as White, 25% as African American, and 3% as Asian. One quarter of the population has their ethnicity identified as Hispanic/Latino. More than half of the population had at least one pre-existing condition. Specifically, 37% presented with a history of hypertension, 27% with diabetes mellitus, 16% with coronary artery disease, 10% with heart failure and 9% with chronic kidney disease.

#### Laboratory Results and Vital Signs at Presentation

Overall, 1,558 (71%) of patients were admitted through the emergency department. On hospital admission, 39% of all patients were tachycardic and 88% of all patients were febrile (**Table 1**). The median white blood cell count was 7 K/uL and lymphocyte percentage was 13.8. The median serum creatinine was 1 mg/dL. Select inflammatory markers performed in subsets of patients in accordance with clinical indication were markedly elevated on admission (**Table 1**). Specifically, the median C-reactive protein (CRP) was 110 mg/L, lactate dehydrogenase (LDH) was 416 U/L, and ferritin was 714 ng/L. Over one-quarter of patients (28%) had a procalcitonin level above 0.49 ng/mL, and nearly half of patients (46%) had a procalcitonin level less than 0.15 ng/mL. The median D-dimer was 1.31 ug/mL; one-third of patients (33%) had a D-dimer greater than 2 ug/mL.

The frequencies of otherwise non-routine laboratory assessments ordered on day of admission increased over time and are shown in **Supplementary Figure 2**. In contrast, hemoglobin, a routinely measured clinical lab value, was ordered at admission in the majority of patients without variation over the study period.

#### Clinical Outcomes

Due to the unknown future clinical course of those patients hospitalized at the time of data freeze, below we present clinical characteristics of only those patients who had completed their hospital course. A total of 1,078 COVID-19 confirmed hospitalized patients completed their hospital course (died or discharged alive) by the date of data freeze on April 02, 2020. Of these, 768 (71%) were discharged and 310 (29%) died in the hospital. Estimates for mortality and need for ICU admissions over time are displayed in **Figure 2**.

The median LOS was 7.7 days, accounting for censoring of patients with ongoing hospitalization. By the mean LOS (10.5 days), 45% of patients had been discharged, 17% had died, and 38% were still hospitalized (**Figure 2**). Demographics and admission laboratory measurements for patients who completed their hospital course are displayed in **Table 2**, stratified by mortality. The median age was significantly greater in

1  
2  
3 those who died as compared to those who were discharged (75 years vs 59 years;  
4  $p < 0.001$ ). Pre-existing conditions were present in 64% of those who died and 46% of  
5 those discharged. We observed a significantly greater prevalence of diabetes (34% vs  
6 20%;  $p = 0.004$ ), chronic obstructive pulmonary disease (9% vs 4%;  $p = 0.002$ ), heart  
7 failure (21% vs 7%;  $p < 0.001$ ), stroke (10% vs 5%;  $p = 0.004$ ), and hypertension (45% vs  
8 30%;  $p < 0.001$ ) in those who died as compared to those who were discharged.  
9 Prevalence of other comorbidities are provided in **Table 2**.

10  
11  
12 We present key laboratory markers at the time of hospital admission in subsets of  
13 patients for whom they were measured. Patients who died had a significantly lower  
14 median lymphocyte percentage (11.7% vs 16.6%;  $p < 0.001$ ) and greater aspartate  
15 aminotransferase (AST) (58.5 U/L vs 36;  $p < 0.001$ ), CRP (162 mg/L vs 79;  $p < 0.001$ ),  
16 ferritin (798 ng/L vs 509 ng/L;  $p < 0.001$ ), LDH (517 U/L vs 347 U/L;  $p < 0.001$ ), and  
17 procalcitonin (0.44 ng/mL vs 0.09 ng/mL;  $p < 0.001$ ) as compared to those who were  
18 discharged (**Table 2**). We also observed a significant elevation in D-Dimer (56%  $> 2.0$   
19  $\mu\text{g/mL}$  vs 21%  $> 2.0 \mu\text{g/mL}$ ;  $p < 0.001$ ) in those who died as compared to those who were  
20 discharged.

### 21 22 23 24 25 26 Patients Requiring ICU Admission

27 Of the 1,078 patients who completed their hospital course, 385 (36%) required intensive  
28 care during their hospital stay. For these patients, vital signs and laboratory values  
29 immediately before transfer to intensive care are displayed in **Table 3**, stratified by  
30 mortality outcome. Immediately before their ICU admission, patients who died were  
31 more likely to be tachycardiac (38% vs 19%;  $p < 0.001$ ) and hypotensive (22% vs 4%;  $p$   
32  $< 0.001$ ) as compared to those who were ultimately discharged. We also observed that  
33 patients who died had a lower median lymphocyte percentage (9.6% vs 16.6%) and  
34 greater serum creatinine (1.5 mg/dL vs 0.6 mg/dL;  $p < 0.001$ ), AST (62 U/L vs 35;  
35  $p < 0.001$ ), CRP (220 mg/L vs 76 mg/L;  $p < 0.001$ ), ferritin (920 ng/L vs 503;  $p < 0.001$ ),  
36 procalcitonin greater than 0.49 mg/mL (59% vs 10%;  $p < 0.001$ ), LDH (513 U/L vs 333  
37 U/L;  $p < 0.001$ ), CK (659 U/L vs 146;  $p < 0.001$ ) and D-dimer greater than 2  $\mu\text{g/mL}$  (63% vs  
38 22%;  $p < 0.001$ ) as compared to those who were discharged (**Table 3**).

### 39 40 41 42 Outcomes by Race

43 Including all individuals (N= 2199), we then investigated survival probability stratified  
44 self-reported race and ethnicity by fitting a Cox proportional hazards model adjusted for  
45 age and sex (**Supplementary Figure 3**). As compared to White individuals, we did not  
46 find a significant association of survival with self-reported Black (HR = 0.88;  $p = 0.37$ ),  
47 or other race (HR = 1.12;  $p = 0.45$ ). We also did not find a significant association of  
48 survival with Hispanic ethnicity (HR = 1.10;  $p = 0.50$ ).

## 49 50 51 **DISCUSSION**

52  
53  
54 The COVID-19 pandemic represents the greatest public health emergency in the  
55 modern world. Limited data, especially in the US, exists to guide clinical care, resource

1  
2  
3 management, and risk stratification in hospitalized patients. Our study is of the case  
4 series of patients reported with confirmed COVID-19 in the US. Previous reports were  
5 either from other countries, examined smaller cohorts, or were focused on critically ill  
6 patients<sup>13,14,18–23</sup>. The present report provides a broad perspective on patients admitted  
7 with COVID-19 in both general medicine ward and intensive care settings. Our study  
8 presents key clinical differences from laboratory data available at time of admission and  
9 thus would aid clinical management decision-making early in the hospital course.  
10 Additionally, our health system serves a unique population representative of the ethnic  
11 and socioeconomic diversity seen in both New York City and across the United States.  
12  
13

14  
15 We highlight several key findings. Among the 1,078 patients who completed their  
16 hospital course (discharge or in-hospital death), the overall mortality rate was 29% and  
17 31% in patients who received ICU care. The overall case fatality rate likely represents  
18 an overestimation of the true disease mortality rate since patients who remained  
19 hospitalized at the date of data freeze were not included in this calculation. The  
20 mortality rate in intensive care is lower than previously described<sup>13,23–25</sup> and may be  
21 reflective of early care escalation.  
22  
23

24 We observed that patients who died had a significantly higher median age with  
25 significantly more pre-existing conditions than those who were discharged. Though 25%  
26 of patients were febrile on admission, this may be an underestimation due to possible  
27 antipyretic use and/or selection bias. A substantial proportion of patients with COVID-19  
28 displayed abnormal laboratory measurements at the time of admission. These included  
29 lymphopenia and elevated inflammatory markers such as D-dimer, CRP, LDH, and  
30 ferritin. These trends persisted among those who died and/or received intensive care,  
31 both on admission and at the time of ICU transfer. If formal epidemiologic analyses  
32 confirm these observations, early laboratory evaluation may be crucial in identifying  
33 patients suspected for COVID-19 prior to RT-PCR test result. It may also aid clinicians  
34 in identifying patients at high risk of decompensation, ICU admission, and potentially  
35 even death. Early identification of high-risk patients could enable timely patient triage  
36 and improved resource allocation. Additional work is needed to develop real-time,  
37 accurate predictive models for risk stratification in COVID-19, particularly to elucidate  
38 the clinical utility of specific laboratory measurements.  
39  
40  
41

42 Han et al. found a significant association of serum lactate dehydrogenase and c-  
43 reactive protein with COVID-19 severity in patients from China<sup>26</sup>. As the number of  
44 cases rose quickly in New York City, MSHS hospitals served as early adopters, creating  
45 a COVID-19 order set in our EHR to streamline objective data gathering, facilitate more  
46 cohesive workflow amongst team members, and minimize ancillary staff exposure by  
47 completing all necessary admission labs at one time. This laboratory order set included  
48 serum D-dimer, C-reactive protein, procalcitonin, ferritin, and lactate dehydrogenase. In  
49 turn, we observed an increase in these orders from the first day of admission over the  
50 study period (**Supplementary Figure 2**). Given the abnormalities observed in patients  
51 who died, these laboratory measurements may be prognostic markers of disease  
52 severity or subsequent clinical course, although this requires further investigation. If  
53  
54  
55  
56  
57  
58  
59  
60

1  
2  
3 confirmed, other health systems expecting impending case surges may consider similar  
4 workflows to promote improved healthcare delivery to affected patients.  
5

6  
7 We found a significantly higher procalcitonin level in individuals who died as compared  
8 to those who were discharged alive. Moreover, of the 2,199 individuals in the study,  
9 28% had a procalcitonin greater than 0.49. In the context of COVID-19, an elevated  
10 procalcitonin may signify a superimposed bacterial infection, but may also be a marker  
11 of acute respiratory distress syndrome or a result of upregulated cytokine production  
12 secondary to respiratory failure. Additionally, we found that individuals who died in the  
13 ICU had higher procalcitonin levels, supporting previous work demonstrating that  
14 patients with more severe COVID-19 infections have higher procalcitonin levels<sup>22,27</sup>.  
15

16  
17 The clinical characteristics of our cohort were largely similar to other large cohorts of  
18 COVID-19 patients from China<sup>2,22</sup> and Italy. Specifically, patients in our dataset were  
19 elderly and had a male predominance, similar to previous reports. There was also a  
20 high prevalence of comorbid conditions, including hypertension and diabetes mellitus.  
21 Similar to an early report from Wuhan, patients largely had a normal procalcitonin at  
22 admission, but individual requiring ICU care had a higher procalcitonin level. However,  
23 as compared studies from Wuhan, China<sup>22</sup> and Genoa, Italy<sup>14</sup>, and New York City<sup>28</sup>, our  
24 cohort had a significantly lower prevalence of lymphopenia at admission.  
25

26  
27 Our study should be considered in light of several limitations. Since COVID-19 testing is  
28 frequently repeated in hospitalized patients and initial testing may result in false  
29 negatives, we are unable to determine whether patients developed their infection during  
30 or before hospital admission. Furthermore, COVID-19 has a variable incubation period  
31 of approximately 8-15 days<sup>29</sup>, and patients may present to the hospital several days  
32 after initial infection or the onset of symptoms. Thus, we are unable to determine  
33 patients' disease duration. Additionally, we separated discharged patients from those  
34 who died, but some patients may have expired after discharge. This could affect our  
35 listed case mortality rate. Our study is also confined by the inherent limitations (e.g.  
36 biases) of EHR data. Although utilizing structured EHR data allows for rapid integration  
37 of multiple data streams and real-time analysis, data present only in clinical note text,  
38 such as symptoms on presentation are missed. Additionally, symptoms present before  
39 the time of admission were not included. We chose not to perform comprehensive  
40 manual chart review to prioritize timely dissemination of our observations. Another  
41 limitation of our dataset is the large proportion of individuals that were censored. These  
42 individuals remained in the hospital at the time of data analysis and thus had unknown  
43 outcomes. Future work will analyze these patients' hospital course in greater detail with  
44 complete outcomes data.  
45  
46  
47  
48

49 As the COVID-19 pandemic spreads from the current epicenter in New York City to  
50 other areas, our report provides meaningful clinical insights that may better inform care  
51 for diverse populations. Future work will aim to predict COVID-19 patient outcomes  
52 using a variety of approaches, thereby reducing healthcare system burden and  
53 permitting improved care delivery.  
54  
55  
56  
57  
58  
59  
60

## Figures

**Figure 1:** Hospital Admissions of COVID-19 patients within our cohort.

Panel A: The number of total patients (n = 2,199) admitted each day to one of the hospitals for the duration of the study period. Panel B: The number of patients cumulatively admitted, cumulatively discharged, or still hospitalized by day.

**Figure 2:** Cumulative incidence function displays the probability of mutually exclusive events of discharge (blue) or death (red) by a given day of hospitalization, accounting for the changing number of patients at risk including censoring. The remaining portion (white) shows patients that are still hospitalized, where the median length of stay is 7.7 days.



**Table 1.** Characteristics of Hospitalized COVID-19 Patients at Baseline (n=2,199)

| Characteristics of Admission                             |             | N with characteristic available |
|----------------------------------------------------------|-------------|---------------------------------|
| <b>Admission Source, n (%)</b>                           |             |                                 |
| Emergency Department                                     | 1558 (71)   | 2199                            |
| Other                                                    | 641 (29)    |                                 |
| <b>Race, n (%)</b>                                       |             |                                 |
| White                                                    | 554 (25.2)  | 2199                            |
| Black or African American                                | 543 (24.7)  |                                 |
| Asian                                                    | 74 (3.4)    |                                 |
| Pacific Islander                                         | 25 (1.1)    |                                 |
| Other                                                    | 912 (41.5)  |                                 |
| Unknown                                                  | 91 (4.1)    |                                 |
| <b>Ethnicity, n (%)</b>                                  |             |                                 |
| Hispanic/Latino                                          | 576 (26.2)  | 2199                            |
| Non-Hispanic/Latino                                      | 1305 (59.4) |                                 |
| Unknown                                                  | 318 (14.5)  |                                 |
| <b>Age, Median (IQR)</b>                                 | 65 (54-76)  | 2199                            |
| <b>Age Groups, n (%)</b>                                 |             |                                 |
| 18-30                                                    | 73 (3.3)    | 2199                            |
| 31-40                                                    | 179 (8.1)   |                                 |
| 41-50                                                    | 225 (10.2)  |                                 |
| 51-60                                                    | 395 (18.0)  |                                 |
| 61-70                                                    | 527 (24.0)  |                                 |
| 71-80                                                    | 444(20.2)   |                                 |
| 81-90                                                    | 274 (12.5)  |                                 |
| 91 or older                                              | 82 (3.7)    |                                 |
| <b>Sex, n (%)</b>                                        |             |                                 |
| Male                                                     | 1293 (58.8) | 2199                            |
| Female                                                   | 906 (41.2)  |                                 |
| <b>Body Mass Index in kg/m<sup>2</sup>, Median (IQR)</b> | 28 (6)      | 1316                            |
| <b>Previous Medical History, n (%)</b>                   |             |                                 |
| Atrial Fibrillation                                      | 156 (7.1)   | 2199                            |
| Asthma                                                   | 180 (8.2)   |                                 |
| Coronary Artery Disease                                  | 343 (15.6)  |                                 |
| Cancer                                                   | 151 (6.9)   |                                 |
| Chronic Kidney Disease                                   | 207 (9.4)   |                                 |
| Chronic Obstructive Pulmonary Disease                    | 113 (5.1)   |                                 |
| Diabetes Mellitus                                        | 583 (26.5)  |                                 |

|                                                           |                   |      |
|-----------------------------------------------------------|-------------------|------|
| Heart Failure                                             | 217 (9.9)         |      |
| Hypertension                                              | 812 (37)          |      |
| Stroke                                                    | 153 (7)           |      |
| <b>Vital Signs at Hospital Admission</b>                  |                   |      |
| Heart Rate in beats per min, Median (IQR)                 | 95 (83-108)       | 2181 |
| Number of patients >100 Beats per min, n(%)               | 857 (39)          |      |
| Temperature in degree Fahrenheit, Median (IQR)            | 99 (98.2 – 100.4) | 2180 |
| Number of patients >100.4-degree Fahrenheit, n (%)        | 1926 (88)         |      |
| Respiratory Rate in breaths/minute, Median (IQR)          | 20 (18-21)        |      |
| Systolic Blood Pressure in mmHg, Median (IQR)             | 130 (116-145)     | 2176 |
| Diastolic Blood Pressure in mmHg, Median (IQR)            | 74 (65-82)        |      |
| Oxygen Saturation, Median (IQR)                           | 95 (92-97)        | 2176 |
| <b>Admission Laboratory Parameters, Median (IQR)</b>      |                   |      |
| White Blood Cell Count -K/uL, Median (IQR)                | 7 (5.2-9.9)       | 2029 |
| Number of patients >10, n (%)                             | 498 (25)          | 2029 |
| Number of patients <4, n (%)                              | 224 (11)          | 2029 |
| Lymphocyte Count - K/uL, Median (IQR)                     | 0.9 (0.7-1.3)     | 1888 |
| Lymphocyte Percentage, Median (IQR)                       | 13.8(8.5-20.5)    | 1972 |
| Hemoglobin - g/dL, Median (IQR)                           | 13.1(11.6-14.4)   | 2031 |
| Platelet Count - K/uL, Median (IQR)                       | 195(151-253)      | 2028 |
| Prothrombin Time - sec, Median (IQR)                      | 13.9(13.2-15)     | 937  |
| Activated Partial Thromboplastin Time - sec, Median (IQR) | 32 (29-36.1)      | 926  |
| Serum Sodium - mEq/L, Median (IQR)                        | 137 (134-140)     | 2015 |
| Serum Potassium - mEq/L, Median (IQR)                     | 4.2 (3.9-4.6)     | 2006 |
| Serum Creatinine - mg/dL, Median (IQR)                    | 1 (0.8-1.5)       | 2018 |
| Aspartate aminotransferase - U/L, Median (IQR)            | 42 (30-70.5)      | 1815 |
| Alanine aminotransferase - U/L, Median (IQR)              | 32 (19-56)        | 1025 |
| Serum Albumin - g/dL, Median (IQR)                        | 3.2 (2.8-3.6)     | 1848 |
| Venous lactate - mmol/L, Median (IQR)                     | 1.5 (1.1-2)       | 775  |
| Number of patients >1.5, n (%)                            | 392 (51)          | 775  |
| <b>Inflammatory Markers</b>                               |                   |      |

|                                               |                  |      |
|-----------------------------------------------|------------------|------|
| C-Reactive Protein - mg/L, Median (IQR)       | 110 (57.8-196)   | 1354 |
| Ferritin -ng/L, Median (IQR)                  | 714 (324-1730)   | 1324 |
| Procalcitonin -ng/mL, Median (IQR)            | 0.18 (0.08-0.57) | 1241 |
| Number of patients >0.49, n (%)               | 344 (28)         | 1241 |
| Number of patients <0.15, n (%)               | 573 (46)         | 1241 |
| Lactate Dehydrogenase -U/L, Median (IQR)      | 416 (314-545)    | 1290 |
| Creatinine Kinase - U/L, Median (IQR)         | 199 (97-565)     | 502  |
| D-Dimer -ug/mL, Median (IQR)                  | 1.31 (0.74-2.44) | 1079 |
| Number of patients >2.0, n (%)                | 352 (33)         | 1079 |
| <b>Required Mechanical Ventilation, n (%)</b> | 446 (20)         | 2199 |

Baseline values are defined as first values on hospitalization. All continuous characteristics are in Median (Interquartile Range) unless specified otherwise and all categorical characteristics are in number (percentage). The percentage is calculated with the number of patients who had the characteristic available as the denominator. For further clarity, the number in which that characteristic was available for is provided separately in adjacent column.

**Table 2.** Characteristics of Hospitalized COVID-19 patients by patients who had in-hospital mortality vs. those who were discharged alive (N=1,078). Continuous and categorical variables were compared using a Wilcoxon test and Fisher exact test, respectively.

|                                                          | <b>Patients with In-Hospital Mortality (n=310)</b> | <b>N with characteristic available</b> | <b>Patients who were discharged alive (n=768)</b> | <b>N with characteristic available</b> | <b>P value</b> |
|----------------------------------------------------------|----------------------------------------------------|----------------------------------------|---------------------------------------------------|----------------------------------------|----------------|
| Required Mechanical Ventilation, n (%)                   | 165 (53)                                           | 310                                    | 14 (1.8)                                          | 768                                    | <0.001         |
| Time to ICU (hours), Median (IQR)                        | 11.0 (4.9 - 44.7)                                  | 121                                    | 12.6 (3.1 - 11.1)                                 | 264                                    | <0.001         |
| <b>Race, n (%)</b>                                       |                                                    |                                        |                                                   |                                        |                |
| White                                                    | 98 (31.6)                                          | 310                                    | 216 (28.1)                                        | 768                                    | <0.001         |
| Black or African American                                | 71 (22.9)                                          |                                        | 185 (24.1)                                        |                                        |                |
| Asian                                                    | 17 (5.5)                                           |                                        | 22 (2.9)                                          |                                        |                |
| Pacific Islander                                         | 1 (0.3)                                            |                                        | 7 (0.9)                                           |                                        |                |
| Other                                                    | 111 (35.8)                                         |                                        | 310 (40.4)                                        |                                        |                |
| Unknown                                                  | 12 (3.9)                                           |                                        | 28 (3.6)                                          |                                        |                |
| <b>Ethnicity, n (%)</b>                                  |                                                    |                                        |                                                   |                                        |                |
| Hispanic/Latino                                          | 58 (18.7)                                          | 310                                    | 208 (27.1)                                        | 768                                    | 0.005          |
| Non-Hispanic/Latino                                      | 198 (63.9)                                         |                                        | 464 (60.4)                                        |                                        |                |
| Unknown                                                  | 54 (17.4)                                          |                                        | 96 (12.5)                                         |                                        |                |
| <b>Age, Median (IQR)</b>                                 | 75 (64-85)                                         |                                        | 59 (45-72)                                        |                                        | <0.001         |
| <b>Age Groups, n (%)</b>                                 |                                                    |                                        |                                                   |                                        |                |
| 18-30                                                    | 1 (0.32)                                           | 310                                    | 53 (6.9)                                          | 768                                    |                |
| 31-40                                                    | 2 (0.65)                                           |                                        | 108 (14.1)                                        |                                        |                |
| 41-50                                                    | 17 (5.5)                                           |                                        | 100 (13.0)                                        |                                        |                |
| 51-60                                                    | 37 (11.9)                                          |                                        | 143 (18.6)                                        |                                        |                |
| 61-70                                                    | 66 (21.3)                                          |                                        | 157 (20.4)                                        |                                        |                |
| 71-80                                                    | 83 (26.8)                                          |                                        | 130 (16.9)                                        |                                        |                |
| 80-90                                                    | 75 (24.2)                                          |                                        | 62 (8.1)                                          |                                        |                |
| >90                                                      | 29 (9.4)                                           |                                        | 15 (2.0)                                          |                                        |                |
| <b>Sex, n (%)</b>                                        |                                                    |                                        |                                                   |                                        |                |
| Male                                                     | 191 (61.6)                                         | 310                                    | 436 (56.8)                                        | 768                                    | 0.16           |
| Female                                                   | 119 (38.4)                                         |                                        | 332 (43.2)                                        |                                        |                |
| <b>Body Mass Index in kg/m<sup>2</sup>, Median (IQR)</b> | 32 (27-34)                                         | 241                                    | 28 (25-32)                                        | 627                                    | <0.001         |

| <b>Previous Medical History, n (%)</b>                    |                  |     |                  |     |        |
|-----------------------------------------------------------|------------------|-----|------------------|-----|--------|
| Atrial Fibrillation                                       | 43 (13.9)        | 768 | 42 (5.5)         | 768 | 0.91   |
| Asthma                                                    | 23 (7.4)         |     | 61 (7.9)         |     | 0.87   |
| Coronary Artery Disease                                   | 83 (26.8)        |     | 84 (10.9)        |     | <0.001 |
| Cancer                                                    | 24 (7.7)         |     | 40 (5.2)         |     | 0.147  |
| Chronic Kidney Disease                                    | 41 (13.2)        |     | 54 (7)           |     | 0.002  |
| Chronic Obstructive Pulmonary Disease                     | 28 (9)           |     | 31 (4)           |     | 0.002  |
| Diabetes Mellitus                                         | 105 (33.9)       |     | 151 (19.7)       |     | <0.001 |
| Heart Failure                                             | 64 (20.6)        |     | 53 (6.9)         |     | <0.001 |
| Hypertension                                              | 140 (45.2)       |     | 233 (30.3)       |     | <0.001 |
| Stroke                                                    | 32 (10.3)        |     | 40 (5.2)         |     | 0.004  |
| <b>Admission Laboratory Parameters</b>                    |                  |     |                  |     |        |
| White Blood Cell Count -K/ $\mu$ L, Median (IQR)          | 8.6 (5.9-12)     | 281 | 6.2 (4.7-8.2)    | 728 | <0.001 |
| Number of patients >10 K/ $\mu$ L, n (%)                  | 105(37)          | 281 | 101(14)          | 728 | <0.001 |
| Number of patients <4 K/ $\mu$ L, n (%)                   | 17 (6)           | 281 | 106 (15)         | 728 | <0.001 |
| Hemoglobin - g/dL, Median (IQR)                           | 12.6 (10.9-14.3) | 282 | 13.2 (11.9-14.4) | 728 | <0.001 |
| Platelet Count - K/uL, Median (IQR)                       | 185 (144-239)    | 282 | 193 (153-247)    | 726 | 0.070  |
| Lymphocyte Count - K/ $\mu$ L, Median (IQR)               | 0.9 (0.6-1.3)    | 248 | 1 (0.8-1.4)      | 689 | <0.001 |
| Lymphocyte Percentage, Median (IQR)                       | 11.7 (6.6-18.6)  | 270 | 16.6 (11.7-24.2) | 710 | <0.001 |
| Prothrombin Time - sec, Median (IQR)                      | 14.2 (13.6-16.3) | 142 | 13.5 (13-14.4)   | 304 | <0.001 |
| Activated Partial Thromboplastin Time - sec, Median (IQR) | 32.9 (30.2-37.6) | 140 | 31.4 (28.7-34.8) | 302 | 0.001  |

|                                                |                  |     |                  |     |        |
|------------------------------------------------|------------------|-----|------------------|-----|--------|
| Serum Sodium - mEq/L, Median (IQR)             | 138 (134-141)    | 284 | 137 (135-140)    | 708 | 0.059  |
| Serum Potassium - mEq/L, Median (IQR)          | 4.4 (4-5)        | 288 | 4.1 (3.8-4.5)    | 706 | <0.001 |
| Serum Creatinine - mg/dL, Median (IQR)         | 1.3 (0.9-2.2)    | 288 | 0.9(0.7-1.2)     | 710 | <0.001 |
| Aspartate aminotransferase - U/L, Median (IQR) | 58.5 (34-102)    | 246 | 36 (26-54)       | 628 | <0.001 |
| Alanine aminotransferase - U/L, Median (IQR)   | 32 (19-58)       | 119 | 30 (19-52)       | 358 | 0.47   |
| Serum Albumin - g/dL, Median (IQR)             | 3 (2.7-3.4)      | 255 | 3.4 (3-3.7)      | 635 | <0.001 |
| Venous lactate - mmol/L, Median (IQR)          | 1.8 (1.3-2.6)    | 108 | 1.3 (1.1-1.8)    | 236 | <0.001 |
| Number of patients >1.5 mmol/L, n (%)          | 74 (69)          | 108 | 88 (37)          | 236 | <0.001 |
| <b>Inflammatory Markers</b>                    |                  |     |                  |     |        |
| C-Reactive Protein - mg/L, Median (IQR)        | 162 (75.7-266)   | 141 | 79.3 (37.5-144)  | 422 | <0.001 |
| Ferritin -ng/L, Median (IQR)                   | 798 (397-2020)   | 146 | 509 (235-987)    | 410 | <0.001 |
| Procalcitonin - ng/mL, Median (IQR)            | 0.44 (0.16-1.45) | 138 | 0.09 (0.05-0.22) | 392 | <0.001 |
| Number of patients >0.49 ng/mL, n (%)          | 67 (49)          | 138 | 46 (12)          | 392 | <0.001 |
| Number of patients <0.15 ng/mL, n (%)          | 34 (25)          | 138 | 263 (67)         | 392 | <0.001 |
| Lactate Dehydrogenase - U/L, Median (IQR)      | 517(371-756)     | 134 | 347 (272-448)    | 419 | <0.001 |
| Creatinine Kinase - U/L, Median (IQR)          | 472 (139-940)    | 74  | 154 (84-319)     | 126 | <0.001 |

|                  |                                            |                      |     |                      |     |        |
|------------------|--------------------------------------------|----------------------|-----|----------------------|-----|--------|
| 1<br>2<br>3      | D-Dimer -<br>µg/mL, Median<br>(IQR)        | 2.41 (1.18-<br>3.79) | 117 | 0.93 (0.58-<br>1.61) | 282 | <0.001 |
| 4<br>5<br>6<br>7 | Number of<br>patients >2.0<br>µg/mL, n (%) | 66(56)               | 117 | 59 (21)              | 282 | <0.001 |

8  
9  
10  
11  
12  
13  
14  
15  
16  
17  
18  
19  
20  
21  
22  
23  
24  
25  
26  
27  
28  
29  
30  
31  
32  
33  
34  
35  
36  
37  
38  
39  
40  
41  
42  
43  
44  
45  
46  
47  
48  
49  
50  
51  
52  
53  
54  
55  
56  
57  
58  
59  
60

Baseline values are defined as first values on hospitalization. All continuous characteristics are in Median (Interquartile Range) unless specified otherwise and all categorical characteristics are in number (percentage). The percentage is calculated with the number of patients who had the characteristic available as the denominator. For further clarity, the number in which that characteristic was available for is provided separately in adjacent column.

**Table 3.** Selected characteristics for hospitalized COVID-19 patients before transfer to Intensive care stratified by in-hospital mortality (N= 385). Continuous and categorical variables were compared using a Wilcoxon test and Fisher exact test, respectively.

|                                                              | Patients with In-Hospital Mortality who Required Intensive Care (n=121) | N with characteristic available | Patients who were discharged alive but Required Intensive Care (n=264) | N with characteristic available | P Value |
|--------------------------------------------------------------|-------------------------------------------------------------------------|---------------------------------|------------------------------------------------------------------------|---------------------------------|---------|
| Required Mechanical Ventilation, n (%)                       | 95 (79)                                                                 | 121                             | 11 (4)                                                                 | 264                             | <0.001  |
| <b>Vital Signs, n (%)</b>                                    |                                                                         |                                 |                                                                        |                                 |         |
| Number of patients with heart rate >100 Beats per min, n (%) | 45 (38)                                                                 | 118                             | 51 (19)                                                                | 264                             | <0.001  |
| Number of patients with temperature >100.4F, n (%)           | 107 (91)                                                                |                                 | 228 (86)                                                               |                                 | 0.370   |
| Systolic Blood Pressure < 100 mm of Hg, n (%)                | 27 (22)                                                                 |                                 | 10 (4)                                                                 |                                 | <0.001  |
| Oxygen Saturation, Median (IQR)                              | 92 (88 – 95)                                                            |                                 | 95 (92 – 97)                                                           |                                 | <0.001  |
| <b>Admission Laboratory Parameters, Median (IQR)</b>         |                                                                         |                                 |                                                                        |                                 |         |
| White Blood Cell Count -K/ $\mu$ L, Median (IQR)             | 10.1 (6.3-14.7)                                                         | 111                             | 5.6 (4.3-7.7)                                                          | 258                             | <0.001  |
| Number of patients >10-K/ $\mu$ L, n (%)                     | 58 (52)                                                                 | 111                             | 28 (11)                                                                | 258                             | <0.001  |
| Number of patients <4 K/ $\mu$ L, n (%)                      | 6 (5)                                                                   | 111                             | 54 (21)                                                                | 258                             | <0.001  |
| Hemoglobin - g/dL, Median (IQR)                              | 12.1 (10.4-13.8)                                                        | 111                             | 13 (11.5-14.2)                                                         | 258                             | <0.001  |
| Platelet Count - K/ $\mu$ L, Median (IQR)                    | 185 (146-230)                                                           | 111                             | 191(153-248)                                                           | 258                             | 0.308   |
| Lymphocyte Count - K/ $\mu$ L, Median (IQR)                  | 0.8 (0.6-1.25)                                                          | 91                              | 1 (0.75-1.4)                                                           | 239                             | 0.003   |



|                                                           |                  |     |                  |     |        |
|-----------------------------------------------------------|------------------|-----|------------------|-----|--------|
| Lymphocyte Percentage, Median (IQR)                       | 9.6 (5.5-17.2)   | 103 | 16.6 (12-26.4)   | 251 | <0.001 |
| Prothrombin Time - sec, Median (IQR)                      | 14.9 (13.8-16.7) | 63  | 13.7(13.2-14.7)  | 97  | <0.001 |
| Activated Partial Thromboplastin Time - sec, Median (IQR) | 34 (30.6-38.2)   | 62  | 31.4 (29.4-35)   | 96  | 0.027  |
| Serum Sodium - mEq/L, Median (IQR)                        | 137 (135-140)    | 114 | 137 (135-140)    | 237 | 0.449  |
| Serum Potassium - mEq/L, Median (IQR)                     | 4.3 (4-4.9)      | 112 | 4.1 (3.8-4.4)    | 237 | <0.001 |
| Serum Creatinine - mg/dL, Median (IQR)                    | 1.5 (0.94-2.4)   | 114 | 0.8 (0.7-1.1)    | 261 | <0.001 |
| Aspartate aminotransferase - U/L, Median (IQR)            | 62 (36.2-105)    | 106 | 35 (26-54.5)     | 236 | <0.001 |
| Alanine aminotransferase - U/L, Median (IQR)              | 28 (16-54)       | 56  | 28 (19-52)       | 215 | 0.514  |
| Serum Albumin - g/dL, Median (IQR)                        | 2.7 (2.3-3.2)    | 107 | 3.3 (2.9-3.6)    | 236 | <0.001 |
| Venous lactate - mmol/L, Median (IQR)                     | 1.55 (1.02-2.15) | 34  | 1.3 (1.1-1.7)    | 49  | 0.157  |
| Number of patients >1.5 mmol/L, n (%)                     | 19 (56)          | 34  | 20 (41)          | 49  | 0.157  |
| <b>Inflammatory Markers</b>                               |                  |     |                  |     |        |
| C-Reactive Protein - mg/L, Median (IQR)                   | 220 (113-297)    | 80  | 75.6 (36.2-134)  | 182 | <0.001 |
| Ferritin -ng/L, Median (IQR)                              | 920 (470-2220)   | 76  | 503 (266-1020)   | 187 | <0.001 |
| Procalcitonin - ng/mL, Median (IQR)                       | 1.02 (0.20-4.5)  | 58  | 0.08 (0.05-0.22) | 163 | <0.001 |
| Number of patients >0.49 ng/mL, n (%)                     | 34 (59)          | 58  | 17 (10)          | 163 | <0.001 |

|                            |                                          |                |    |                |     |        |
|----------------------------|------------------------------------------|----------------|----|----------------|-----|--------|
| 1<br>2<br>3                | Number of patients <0.15 ng/mL, n (%)    | 11 (19)        | 58 | 106 (65)       | 163 | <0.001 |
| 4<br>5<br>6<br>7           | Lactate Dehydrogenase -U/L, Median (IQR) | 513 (399-729)  | 67 | 333 (274-422)  | 188 | <0.001 |
| 8<br>9<br>10               | Creatinine Kinase -U/L, Median (IQR)     | 659 (305-1450) | 42 | 146 (60-268)   | 73  | <0.001 |
| 11<br>12<br>13<br>14<br>15 | D-Dimer -µg/mL, Median (IQR)             | 2.7 (1.6-5.8)  | 57 | 0.83 (0.5-1.6) | 127 | <0.001 |
| 16<br>17<br>18<br>19       | Number of patients >2.0 µg/mL, n (%)     | 36 (63)        | 57 | 28 (22)        | 127 | <0.001 |

20  
21  
22  
23  
24  
25  
26  
27  
28  
29  
30  
31  
32  
33  
34  
35  
36  
37  
38  
39  
40  
41  
42  
43  
44  
45  
46  
47  
48  
49  
50  
51  
52  
53  
54  
55  
56  
57  
58  
59  
60

All values are closest values in twenty-four hours prior to ICU admission. All continuous characteristics are in Median (Interquartile Range) unless specified otherwise and all categorical characteristics are in number (percentage). The percentage is calculated with the number of patients who had the characteristic available as the denominator. For further clarity, the number in which that characteristic was available for is provided separately in adjacent column.

## References

1. COVID-19 Map [Internet]. 2020. Available from: <https://coronavirus.jhu.edu/map.html>
2. Guan W, Ni Z, Hu Y, et al. Clinical Characteristics of Coronavirus Disease 2019 in China. *N Engl J Med* 2020;
3. Gupta A, Madhavan M V., Sehgal K, et al. Extrapulmonary manifestations of COVID-19. *Nat. Med.* 2020;
4. Fisher M, Neugarten J, Bellin E, et al. AKI in Hospitalized Patients with and without COVID-19: A Comparison Study. *J Am Soc Nephrol* 2020;
5. Chan L, Chaudhary K, Saha A, et al. AKI in Hospitalized Patients with COVID-19. *J Am Soc Nephrol* [Internet] 2020;ASN.2020050615. Available from: <http://jasn.asnjournals.org/content/early/2020/09/02/ASN.2020050615.abstract>
6. Lala A, Johnson KW, Januzzi JL, et al. Prevalence and Impact of Myocardial Injury in Patients Hospitalized With COVID-19 Infection. *J Am Coll Cardiol* 2020;
7. Paranjpe I, Fuster V, Lala A, et al. Association of Treatment Dose Anticoagulation With In-Hospital Survival Among Hospitalized Patients With COVID-19. *J. Am. Coll. Cardiol.* 2020;
8. Menter T, Haslbauer JD, Nienhold R, et al. Postmortem examination of COVID-19 patients reveals diffuse alveolar damage with severe capillary congestion and variegated findings in lungs and other organs suggesting vascular dysfunction. *Histopathology* 2020;
9. Zhang Y, Xiao M, Zhang S, et al. Coagulopathy and Antiphospholipid Antibodies in Patients with Covid-19. *N Engl J Med* 2020;
10. Yin S, Huang M, Li D, Tang N. Difference of coagulation features between severe pneumonia induced by SARS-CoV2 and non-SARS-CoV2. *J Thromb Thrombolysis* 2020;
11. Bilaloglu S, Aphinyanaphongs Y, Jones S, Iturrate E, Hochman J, Berger JS. Thrombosis in Hospitalized Patients with COVID-19 in a New York City Health System. *JAMA - J. Am. Med. Assoc.* 2020;
12. Grasselli G, Zangrillo A, Zanella A, et al. Baseline Characteristics and Outcomes of 1591 Patients Infected With SARS-CoV-2 Admitted to ICUs of the Lombardy Region, Italy. *JAMA* [Internet] 2020; Available from: <https://doi.org/10.1001/jama.2020.5394>
13. Yang X, Yu Y, Xu J, et al. Clinical course and outcomes of critically ill patients with SARS-CoV-2 pneumonia in Wuhan, China: a single-centered, retrospective, observational study. *Lancet Respir Med* 2020;
14. Vena A, Giacobbe DR, Di Biagio A, et al. Clinical characteristics, management and in-hospital mortality of patients with coronavirus disease 2019 in Genoa, Italy. *Clin Microbiol Infect* 2020;
15. States Reporting Cases of COVID-19 to CDC [Internet]. 2020. Available from: <https://www.cdc.gov/coronavirus/2019-ncov/cases-updates/cases-in-us.html>
16. Lipsitch M, Swerdlow DL, Finelli L. Defining the Epidemiology of Covid-19 - Studies Needed. *N Engl J Med* 2020;

17. R Core Team. R Core Team (2017). R: A language and environment for statistical computing. R Found Stat Comput Vienna, Austria URL <http://www.R-project.org/> 2017; R Foundation for Statistical Computing.
18. McMichael TM, Currie DW, Clark S, et al. Epidemiology of Covid-19 in a Long-Term Care Facility in King County, Washington. *N Engl J Med* 2020;
19. Ng O-T, Marimuthu K, Chia P-Y, et al. SARS-CoV-2 Infection among Travelers Returning from Wuhan, China. *N Engl J Med* 2020;
20. Holshue ML, DeBolt C, Lindquist S, et al. First case of 2019 novel coronavirus in the United States. *N Engl J Med* 2020;
21. Verity R, Okell LC, Dorigatti I, et al. Estimates of the severity of coronavirus disease 2019 : a model-based analysis. *Lancet Infect Dis* 2020;
22. Zhou F, Yu T, Du R, et al. Clinical course and risk factors for mortality of adult inpatients with COVID-19 in Wuhan, China: a retrospective cohort study. *Lancet* 2020;
23. Bhatraju PK, Ghassemieh BJ, Nichols M, et al. Covid-19 in Critically Ill Patients in the Seattle Region - Case Series. *N Engl J Med* 2020;
24. CDC C. The Novel Coronavirus Pneumonia Emergency Response Epidemiology Team. The epidemiological characteristics of an outbreak of 2019 novel coronavirus disease (COVID-19). 2020.
25. Arentz M, Yim E, Klaff L, et al. Characteristics and Outcomes of 21 Critically Ill Patients with COVID-19 in Washington State. *JAMA - J. Am. Med. Assoc.* 2020;
26. Han Y, Zhang H, Mu S, et al. Lactate dehydrogenase, a Risk Factor of Severe COVID-19 Patients. *medRxiv [Internet]* 2020;2020.03.24.20040162. Available from: <http://medrxiv.org/content/early/2020/03/27/2020.03.24.20040162.abstract>
27. Lippi G, Plebani M. Procalcitonin in patients with severe coronavirus disease 2019 (COVID-19): A meta-analysis. *Clin. Chim. Acta.* 2020;
28. Goyal P, Choi JJ, Pinheiro LC, et al. Clinical characteristics of COVID-19 in New York City. *N. Engl. J. Med.* 2020;
29. Lauer SA, Grantz KH, Bi Q, et al. The Incubation Period of Coronavirus Disease 2019 (COVID-19) From Publicly Reported Confirmed Cases: Estimation and Application. *Ann Intern Med* 2020;

#### Author Contributions:

I.P., A.J.R., J.F.D., A.L., M.S., A.V., K.W.J, S.S., A.K., R.O., S.M., U.N., S.J., A.K., P.T., J.J., A.F. developed and performed the analysis. P.G., M.A.L., J.F., J.A.A., E.B., C.R.H., B.M. critically appraised the manuscript and helped acquire data. I.P., A.L., A.J.R., J.F.D., R.M., M.D., E.G., D.M., P.F.O., L.M.H., R.F., M.S., P.K., V.F., E.P.B., J.N., E.J.N. C.C., D.S.C., D.L.R., supervised the project I.P., A.L., A.J.R., J.F.D., G.N.N, B.S.G, A.W.C, A.C.J drafted the manuscript.

## Competing Interests

Dr. Nadkarni reports grants, personal fees and non-financial support from Renalytix AI, non-financial support from Pensieve Health, personal fees from AstraZeneca, personal fees from AstraZeneca, personal fees from BioVie, personal fees from GLG Consulting, from outside the submitted work. Dr. Lala reports personal fees from Zoll, outside the submitted work. Dr. Fayad reports grants from Daiichi Sankyo, grants from Amgen, grants from Bristol Myers Squibb, from Siemens Healthineers, personal fees from Alexion, personal fees from GlaxoSmithKline, personal fees from Trained Therapeutix Discovery, outside the submitted work. In addition, Dr. Fayad has patents licensed to Trained Therapeutix Discovery. The other authors have nothing to disclose.

For peer review only

### Patients Admitted per Day



### Admitted, Discharged, and Hospitalized Patients



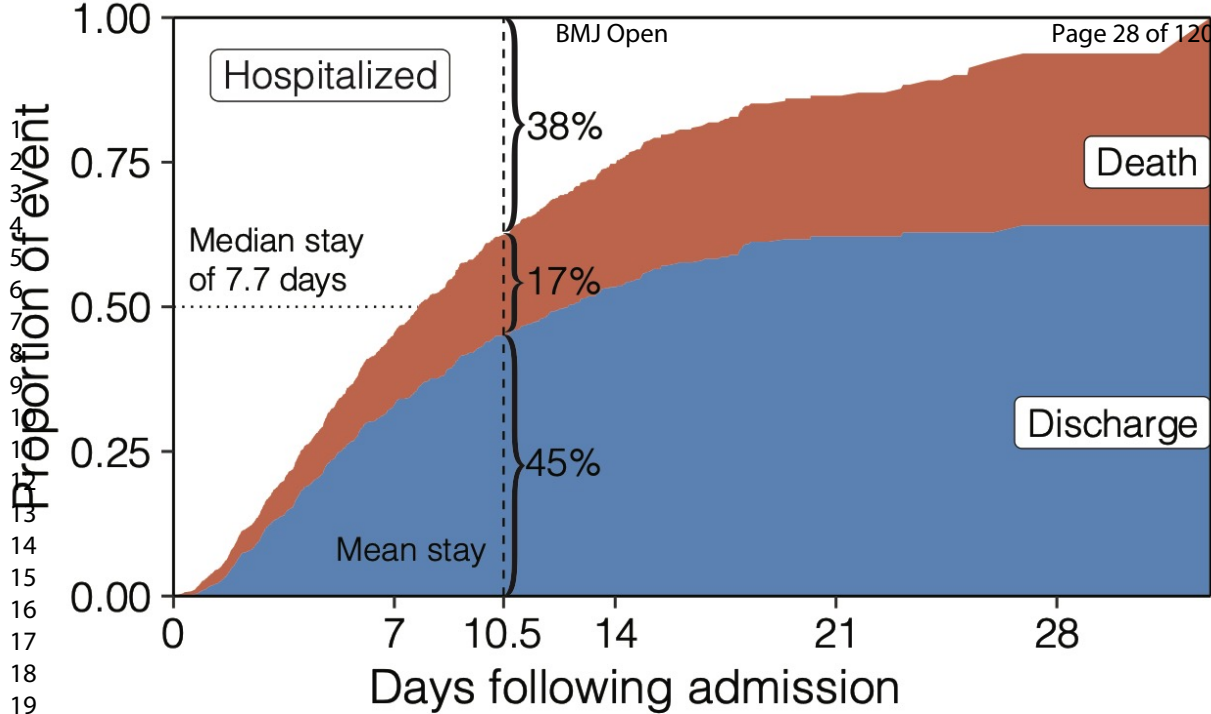

## Supplementary Material

### Supplementary Methods

#### Mount Sinai Covid Informatics Center (MSCIC) Data Platform

This dataset of clinical data is the first part of a larger effort that aims to create an heterogeneous collection of COVID-19 patient data. This effort brings together different stakeholders from MSHS, including research faculty, data scientists, clinicians, and hospital administrators, among others. The resulting dataset includes or will include longitudinal electronic health record (EHR) patient clinical data, multi-omics, such as genomics, imaging, such as chest CT scans, among others. The data, which are updated on a daily basis, is made available within a secure computational framework based on internal Microsoft Azure Cloud to researchers and analysts within the MSHS and the Icahn School of Medicine at Mount Sinai. This dataset is intended to foster research projects to improve the knowledge of this disease and augment clinical operations with machine intelligence.

#### Supplementary Figures

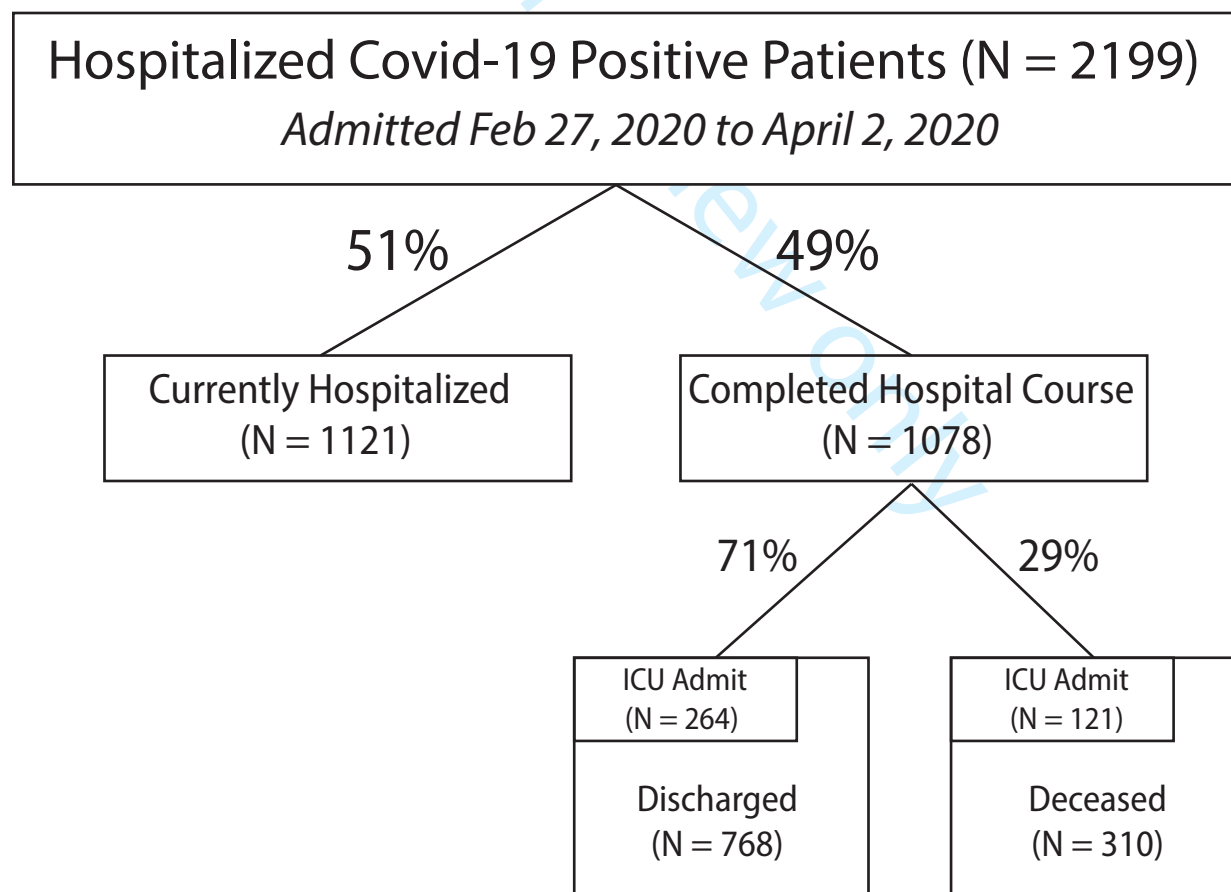



**Supplementary Figure 1:** Flowchart of patients included in study cohort. All patients had a confirmed COVID-19 qPCR from a nasopharyngeal swab. Patients were stratified by completion of hospital course.

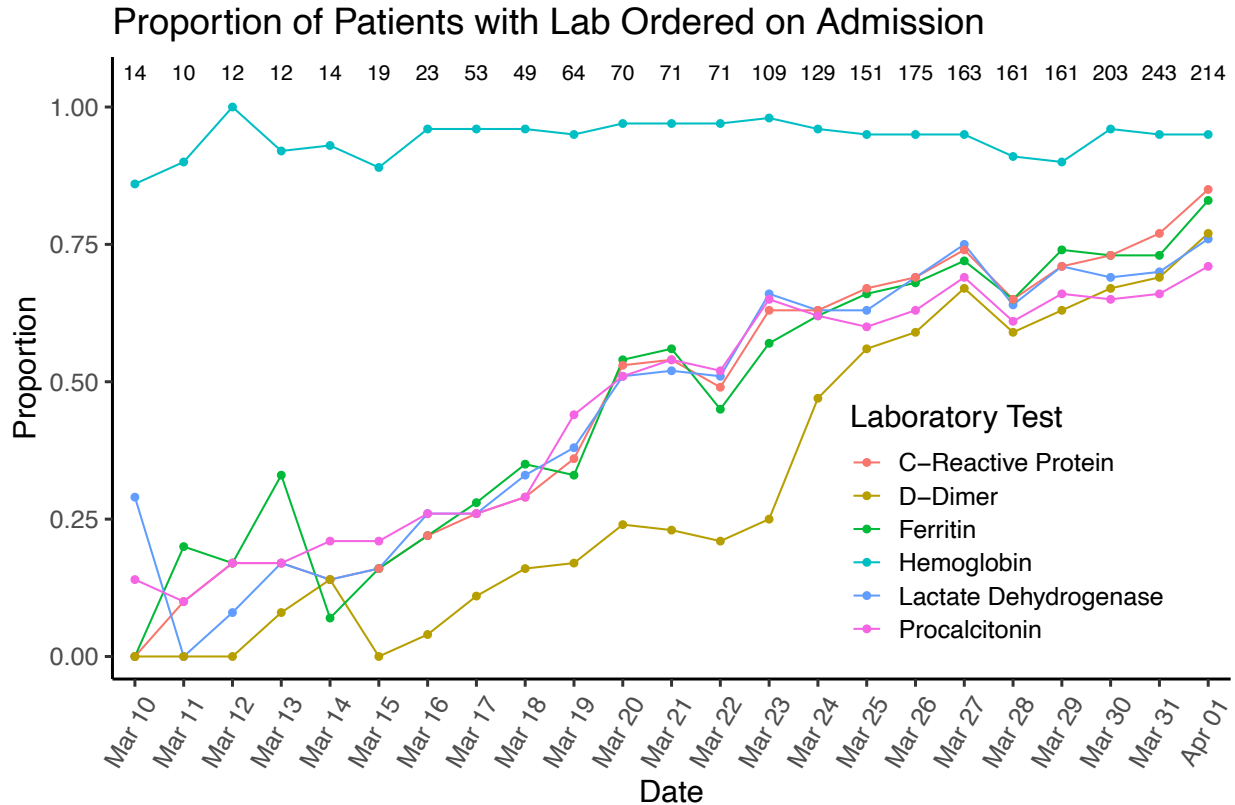

**Supplementary Figure 2** Trends in laboratory test orders per day. Tests that comprised the Mount Sinai Health System COVID-19 special order (C-reactive protein, d-dimer, ferritin, hemoglobin, lactate dehydrogenase, procalcitonin) set were included. Number of orders of hemoglobin were also included as a comparison. We only included dates in which there were at least 10 COVID-19 patients admitted (i.e., 03/10/2020). We included data up to 04/01/2020 to leave a full 24 hours for the tests to be ordered.

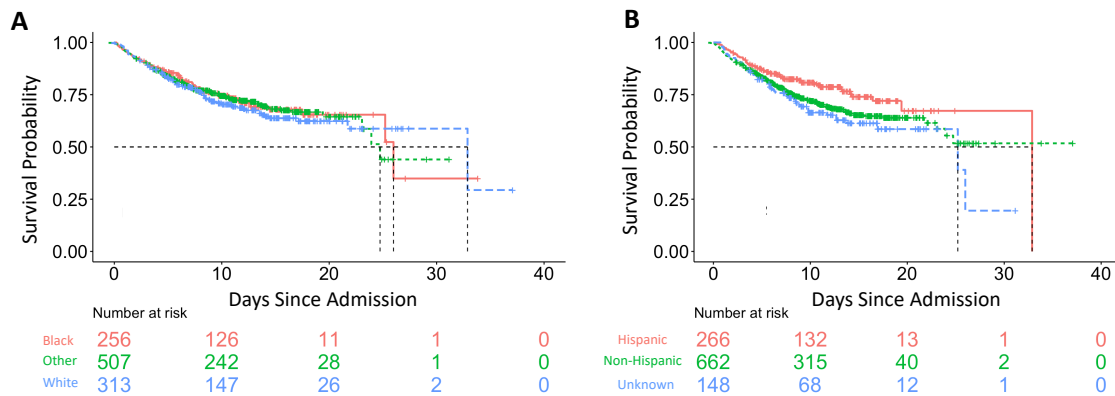

**Supplementary Figure 3** Kaplan Meier curve stratified by A) self-reported race and B) ethnicity. Individuals were censored if they were hospitalized at the time of data-freeze.

**Supplementary Table 1** Diagnostic codes used to identify clinical comorbidities. Patients were determined to have a history of a clinical condition if they had at least one diagnostic code for the specific condition in their electronic health record.

| DIAGNOSIS           | CODE   | TYPE  | DESCRIPTION                                            |
|---------------------|--------|-------|--------------------------------------------------------|
| Atrial fibrillation | 427.3  | ICD9  | Atrial fibrillation and flutter                        |
| Atrial fibrillation | 427.31 | ICD9  | Atrial fibrillation                                    |
| Atrial fibrillation | 427.32 | ICD9  | Atrial flutter                                         |
| Atrial fibrillation | I48    | ICD10 | Atrial fibrillation and flutter                        |
| Atrial fibrillation | I48.0  | ICD10 | Paroxysmal atrial fibrillation                         |
| Atrial fibrillation | I48.1  | ICD10 | Persistent atrial fibrillation                         |
| Atrial fibrillation | I48.2  | ICD10 | Chronic atrial fibrillation                            |
| Atrial fibrillation | I48.3  | ICD10 | Typical atrial flutter                                 |
| Atrial fibrillation | I48.4  | ICD10 | Atypical atrial flutter                                |
| Atrial fibrillation | I48.91 | ICD10 | Unspecified atrial fibrillation                        |
| Atrial fibrillation | I48.92 | ICD10 | Unspecified atrial flutter                             |
| Asthma              | 493    | ICD9  | Asthma                                                 |
| Asthma              | 493    | ICD9  | Extrinsic asthma                                       |
| Asthma              | 493    | ICD9  | Extrinsic asthma without mention of status asthmaticus |
| Asthma              | 493.01 | ICD9  | Extrinsic asthma with status asthmaticus               |
| Asthma              | 493.02 | ICD9  | Extrinsic asthma with acute exacerbation               |
| Asthma              | 493.1  | ICD9  | Intrinsic asthma                                       |
| Asthma              | 493.1  | ICD9  | Intrinsic asthma without mention of status asthmaticus |
| Asthma              | 493.11 | ICD9  | Intrinsic asthma with status asthmaticus               |
| Asthma              | 493.12 | ICD9  | Intrinsic asthma with acute exacerbation               |
| Asthma              | 493.2  | ICD9  | Chronic obstructive asthma                             |
| Asthma              | 493.2  | ICD9  | Chronic obstructive asthma                             |
| Asthma              | 493.21 | ICD9  | Chronic obstructive asthma                             |
| Asthma              | 493.22 | ICD9  | Chronic obstructive asthma                             |
| Asthma              | 493.8  | ICD9  | Other forms of asthma                                  |
| Asthma              | 493.81 | ICD9  | Exercise induced bronchospasm                          |
| Asthma              | 493.82 | ICD9  | Cough variant asthma                                   |
| Asthma              | 493.9  | ICD9  | Asthma                                                 |
| Asthma              | 493.9  | ICD9  | Asthma                                                 |
| Asthma              | 493.91 | ICD9  | Asthma                                                 |
| Asthma              | 493.92 | ICD9  | Asthma                                                 |
| Asthma              | J45.0  | ICD10 | Asthma                                                 |
| Asthma              | J45.20 | ICD10 | Mild intermittent asthma                               |
| Asthma              | J45.21 | ICD10 | Mild intermittent asthma with (acute) exacerbation     |
| Asthma              | J45.22 | ICD10 | Mild intermittent asthma with status asthmaticus       |

|                         |         |       |                                                                   |
|-------------------------|---------|-------|-------------------------------------------------------------------|
| Asthma                  | J45.30  | ICD10 | Mild persistent asthma                                            |
| Asthma                  | J45.31  | ICD10 | Mild persistent asthma with (acute) exacerbation                  |
| Asthma                  | J45.32  | ICD10 | Mild persistent asthma with status asthmaticus                    |
| Asthma                  | J45.40  | ICD10 | Moderate persistent asthma                                        |
| Asthma                  | J45.41  | ICD10 | Moderate persistent asthma with (acute) exacerbation              |
| Asthma                  | J45.42  | ICD10 | Moderate persistent asthma with status asthmaticus                |
| Asthma                  | J45.50  | ICD10 | Severe persistent asthma                                          |
| Asthma                  | J45.51  | ICD10 | Severe persistent asthma with (acute) exacerbation                |
| Asthma                  | J45.52  | ICD10 | Severe persistent asthma with status asthmaticus                  |
| Asthma                  | J45.90  | ICD10 | Unspecified asthma                                                |
| Asthma                  | J45.901 | ICD10 | Unspecified asthma with (acute) exacerbation                      |
| Asthma                  | J45.902 | ICD10 | Unspecified asthma with status asthmaticus                        |
| Asthma                  | J45.909 | ICD10 | Unspecified asthma                                                |
| Asthma                  | J45.990 | ICD10 | Exercise induced bronchospasm                                     |
| Asthma                  | J45.991 | ICD10 | Cough variant asthma                                              |
| Asthma                  | J45.998 | ICD10 | Other asthma                                                      |
| Coronary artery disease | 411.81  | ICD9  | Acute coronary occlusion without myocardial infarction            |
| Coronary artery disease | 414     | ICD9  | Coronary atherosclerosis                                          |
| Coronary artery disease | 414     | ICD9  | Coronary atherosclerosis of unspecified type of vessel            |
| Coronary artery disease | 414.01  | ICD9  | Coronary atherosclerosis of native coronary artery                |
| Coronary artery disease | 414.02  | ICD9  | Coronary atherosclerosis of autologous biological bypass graft    |
| Coronary artery disease | 414.03  | ICD9  | Coronary atherosclerosis of nonautologous biological bypass graft |
| Coronary artery disease | 414.04  | ICD9  | Coronary atherosclerosis of artery bypass graft                   |
| Coronary artery disease | 414.05  | ICD9  | Coronary atherosclerosis of unspecified type of bypass graft      |

|                         |        |      |                                                           |
|-------------------------|--------|------|-----------------------------------------------------------|
| Coronary artery disease | 414.2  | ICD9 | Chronic total occlusion of coronary artery                |
| Coronary artery disease | 414.3  | ICD9 | Coronary atherosclerosis due to lipid rich plaque         |
| Coronary artery disease | 414.4  | ICD9 | Coronary atherosclerosis due to calcified coronary lesion |
| Coronary artery disease | 410    | ICD9 | Acute myocardial infarction                               |
| Coronary artery disease | 410    | ICD9 | Acute myocardial infarction                               |
| Coronary artery disease | 410    | ICD9 | Acute myocardial infarction                               |
| Coronary artery disease | 410.01 | ICD9 | Acute myocardial infarction                               |
| Coronary artery disease | 410.02 | ICD9 | Acute myocardial infarction                               |
| Coronary artery disease | 410.1  | ICD9 | Acute myocardial infarction                               |
| Coronary artery disease | 410.1  | ICD9 | Acute myocardial infarction                               |
| Coronary artery disease | 410.11 | ICD9 | Acute myocardial infarction                               |
| Coronary artery disease | 410.12 | ICD9 | Acute myocardial infarction                               |
| Coronary artery disease | 410.2  | ICD9 | Acute myocardial infarction                               |
| Coronary artery disease | 410.2  | ICD9 | Acute myocardial infarction                               |
| Coronary artery disease | 410.21 | ICD9 | Acute myocardial infarction                               |
| Coronary artery disease | 410.22 | ICD9 | Acute myocardial infarction                               |
| Coronary artery disease | 410.3  | ICD9 | Acute myocardial infarction                               |
| Coronary artery disease | 410.3  | ICD9 | Acute myocardial infarction                               |
| Coronary artery disease | 410.31 | ICD9 | Acute myocardial infarction                               |
| Coronary artery disease | 410.32 | ICD9 | Acute myocardial infarction                               |

|                         |        |      |                             |
|-------------------------|--------|------|-----------------------------|
| Coronary artery disease | 410.4  | ICD9 | Acute myocardial infarction |
| Coronary artery disease | 410.4  | ICD9 | Acute myocardial infarction |
| Coronary artery disease | 410.41 | ICD9 | Acute myocardial infarction |
| Coronary artery disease | 410.42 | ICD9 | Acute myocardial infarction |
| Coronary artery disease | 410.5  | ICD9 | Acute myocardial infarction |
| Coronary artery disease | 410.5  | ICD9 | Acute myocardial infarction |
| Coronary artery disease | 410.51 | ICD9 | Acute myocardial infarction |
| Coronary artery disease | 410.52 | ICD9 | Acute myocardial infarction |
| Coronary artery disease | 410.6  | ICD9 | Acute myocardial infarction |
| Coronary artery disease | 410.6  | ICD9 | Acute myocardial infarction |
| Coronary artery disease | 410.61 | ICD9 | Acute myocardial infarction |
| Coronary artery disease | 410.62 | ICD9 | Acute myocardial infarction |
| Coronary artery disease | 410.7  | ICD9 | Acute myocardial infarction |
| Coronary artery disease | 410.7  | ICD9 | Acute myocardial infarction |
| Coronary artery disease | 410.71 | ICD9 | Acute myocardial infarction |
| Coronary artery disease | 410.72 | ICD9 | Acute myocardial infarction |
| Coronary artery disease | 410.8  | ICD9 | Acute myocardial infarction |
| Coronary artery disease | 410.8  | ICD9 | Acute myocardial infarction |
| Coronary artery disease | 410.81 | ICD9 | Acute myocardial infarction |
| Coronary artery disease | 410.82 | ICD9 | Acute myocardial infarction |

|                         |         |       |                                                                                                    |
|-------------------------|---------|-------|----------------------------------------------------------------------------------------------------|
| Coronary artery disease | 410.9   | ICD9  | Acute myocardial infarction                                                                        |
| Coronary artery disease | 410.9   | ICD9  | Acute myocardial infarction                                                                        |
| Coronary artery disease | 410.91  | ICD9  | Acute myocardial infarction                                                                        |
| Coronary artery disease | 410.92  | ICD9  | Acute myocardial infarction                                                                        |
| Coronary artery disease | 411     | ICD9  | Postmyocardial infarction syndrome                                                                 |
| Coronary artery disease | 412     | ICD9  | Old myocardial infarction                                                                          |
| Coronary artery disease | 429.7   | ICD9  | Certain sequelae of myocardial infarction                                                          |
| Coronary artery disease | 429.71  | ICD9  | Cardiac septal defect                                                                              |
| Coronary artery disease | 429.79  | ICD9  | Other sequelae of myocardial infarction                                                            |
| Coronary artery disease | I24.0   | ICD10 | Acute coronary thrombosis not resulting in myocardial infarction                                   |
| Coronary artery disease | I25.1   | ICD10 | Atherosclerotic heart disease of native coronary artery                                            |
| Coronary artery disease | I25.10  | ICD10 | Atherosclerotic heart disease of native coronary artery without angina pectoris                    |
| Coronary artery disease | I25.110 | ICD10 | Atherosclerotic heart disease of native coronary artery with unstable angina pectoris              |
| Coronary artery disease | I25.111 | ICD10 | Atherosclerotic heart disease of native coronary artery with angina pectoris with documented spasm |
| Coronary artery disease | I25.118 | ICD10 | Atherosclerotic heart disease of native coronary artery with other forms of angina pectoris        |
| Coronary artery disease | I25.119 | ICD10 | Atherosclerotic heart disease of native coronary artery with unspecified angina pectoris           |
| Coronary artery disease | I25.700 | ICD10 | Atherosclerosis of coronary artery bypass graft(s)                                                 |
| Coronary artery disease | I25.701 | ICD10 | Atherosclerosis of coronary artery bypass graft(s)                                                 |

|                         |         |       |                                                                                                                 |
|-------------------------|---------|-------|-----------------------------------------------------------------------------------------------------------------|
| Coronary artery disease | I25.708 | ICD10 | Atherosclerosis of coronary artery bypass graft(s)                                                              |
| Coronary artery disease | I25.709 | ICD10 | Atherosclerosis of coronary artery bypass graft(s)                                                              |
| Coronary artery disease | I25.710 | ICD10 | Atherosclerosis of autologous vein coronary artery bypass graft(s) with unstable angina pectoris                |
| Coronary artery disease | I25.711 | ICD10 | Atherosclerosis of autologous vein coronary artery bypass graft(s) with angina pectoris with documented spasm   |
| Coronary artery disease | I25.718 | ICD10 | Atherosclerosis of autologous vein coronary artery bypass graft(s) with other forms of angina pectoris          |
| Coronary artery disease | I25.719 | ICD10 | Atherosclerosis of autologous vein coronary artery bypass graft(s) with unspecified angina pectoris             |
| Coronary artery disease | I25.720 | ICD10 | Atherosclerosis of autologous artery coronary artery bypass graft(s) with unstable angina pectoris              |
| Coronary artery disease | I25.721 | ICD10 | Athscl autologous artery CABG w ang pctrs w documented spasm                                                    |
| Coronary artery disease | I25.728 | ICD10 | Atherosclerosis of autologous artery coronary artery bypass graft(s) with other forms of angina pectoris        |
| Coronary artery disease | I25.729 | ICD10 | Atherosclerosis of autologous artery coronary artery bypass graft(s) with unspecified angina pectoris           |
| Coronary artery disease | I25.730 | ICD10 | Atherosclerosis of nonautologous biological coronary artery bypass graft(s) with unstable angina pectoris       |
| Coronary artery disease | I25.731 | ICD10 | Athscl nonaut biological CABG w ang pctrs w documented spasm                                                    |
| Coronary artery disease | I25.738 | ICD10 | Atherosclerosis of nonautologous biological coronary artery bypass graft(s) with other forms of angina pectoris |
| Coronary artery disease | I25.739 | ICD10 | Atherosclerosis of nonautologous biological coronary artery bypass graft(s) with unspecified angina pectoris    |
| Coronary artery disease | I25.790 | ICD10 | Atherosclerosis of other coronary artery bypass graft(s) with unstable angina pectoris                          |



|                         |         |       |                                                                                                     |
|-------------------------|---------|-------|-----------------------------------------------------------------------------------------------------|
| Coronary artery disease | I25.791 | ICD10 | Atherosclerosis of other coronary artery bypass graft(s) with angina pectoris with documented spasm |
| Coronary artery disease | I25.798 | ICD10 | Atherosclerosis of other coronary artery bypass graft(s) with other forms of angina pectoris        |
| Coronary artery disease | I25.799 | ICD10 | Atherosclerosis of other coronary artery bypass graft(s) with unspecified angina pectoris           |
| Coronary artery disease | I25.810 | ICD10 | Atherosclerosis of coronary artery bypass graft(s) without angina pectoris                          |
| Coronary artery disease | I25.82  | ICD10 | Chronic total occlusion of coronary artery                                                          |
| Coronary artery disease | I25.83  | ICD10 | Coronary atherosclerosis due to lipid rich plaque                                                   |
| Coronary artery disease | I25.84  | ICD10 | Coronary atherosclerosis due to calcified coronary lesion                                           |
| Coronary artery disease | I21     | ICD10 | Acute myocardial infarction                                                                         |
| Coronary artery disease | I23.1   | ICD10 | Atrial septal defect as current complication following acute myocardial infarction                  |
| Coronary artery disease | I51.0   | ICD10 | Cardiac septal defect                                                                               |
| Coronary artery disease | I24.1   | ICD10 | Dressler's syndrome                                                                                 |
| Coronary artery disease | I23.0   | ICD10 | Hemopericardium as current complication following acute myocardial infarction                       |
| Coronary artery disease | I51.3   | ICD10 | Intracardiac thrombosis                                                                             |
| Coronary artery disease | I21.9   | ICD10 | Myocardial infarction (acute) NOS                                                                   |
| Coronary artery disease | I21.A1  | ICD10 | Myocardial infarction type 2                                                                        |
| Coronary artery disease | I21.4   | ICD10 | Non-ST elevation (NSTEMI) myocardial infarction                                                     |
| Coronary artery disease | I25.2   | ICD10 | Old myocardial infarction                                                                           |

|                         |        |       |                                                                                                               |
|-------------------------|--------|-------|---------------------------------------------------------------------------------------------------------------|
| Coronary artery disease | I23.8  | ICD10 | Other current complications following acute myocardial infarction                                             |
| Coronary artery disease | I21.A9 | ICD10 | Other myocardial infarction type                                                                              |
| Coronary artery disease | I21.A  | ICD10 | Other type of myocardial infarction                                                                           |
| Coronary artery disease | I23.7  | ICD10 | Postinfarction angina                                                                                         |
| Coronary artery disease | I23.3  | ICD10 | Rupture of cardiac wall without hemopericardium as current complication following acute myocardial infarction |
| Coronary artery disease | I21.02 | ICD10 | ST elevation (STEMI) myocardial infarction involving left anterior descending coronary artery                 |
| Coronary artery disease | I21.21 | ICD10 | ST elevation (STEMI) myocardial infarction involving left circumflex coronary artery                          |
| Coronary artery disease | I21.01 | ICD10 | ST elevation (STEMI) myocardial infarction involving left main coronary artery                                |
| Coronary artery disease | I21.09 | ICD10 | ST elevation (STEMI) myocardial infarction involving other coronary artery of anterior wall                   |
| Coronary artery disease | I21.19 | ICD10 | ST elevation (STEMI) myocardial infarction involving other coronary artery of inferior wall                   |
| Coronary artery disease | I21.29 | ICD10 | ST elevation (STEMI) myocardial infarction involving other sites                                              |
| Coronary artery disease | I21.11 | ICD10 | ST elevation (STEMI) myocardial infarction involving right coronary artery                                    |
| Coronary artery disease | I21.0  | ICD10 | ST elevation (STEMI) myocardial infarction of anterior wall                                                   |
| Coronary artery disease | I21.1  | ICD10 | ST elevation (STEMI) myocardial infarction of inferior wall                                                   |
| Coronary artery disease | I21.2  | ICD10 | ST elevation (STEMI) myocardial infarction of other sites                                                     |
| Coronary artery disease | I21.3  | ICD10 | ST elevation (STEMI) myocardial infarction of unspecified site                                                |

|                         |       |       |                                                                                         |
|-------------------------|-------|-------|-----------------------------------------------------------------------------------------|
| Coronary artery disease | I22.2 | ICD10 | Subsequent non-ST elevation (NSTEMI) myocardial infarction                              |
| Coronary artery disease | I22   | ICD10 | Subsequent ST elevation (STEMI) and non-ST elevation (NSTEMI) myocardial infarction     |
| Coronary artery disease | I22.0 | ICD10 | Subsequent ST elevation (STEMI) myocardial infarction of anterior wall                  |
| Coronary artery disease | I22.1 | ICD10 | Subsequent ST elevation (STEMI) myocardial infarction of inferior wall                  |
| Coronary artery disease | I22.8 | ICD10 | Subsequent ST elevation (STEMI) myocardial infarction of other sites                    |
| Coronary artery disease | I22.9 | ICD10 | Subsequent ST elevation (STEMI) myocardial infarction of unspecified site               |
| Coronary artery disease | I23.6 | ICD10 | Thrombosis of atrium                                                                    |
| Coronary artery disease | I23.2 | ICD10 | Ventricular septal defect as current complication following acute myocardial infarction |
| Cancer                  | 140   | ICD9  | Malignant neoplasm of lip                                                               |
| Cancer                  | 140   | ICD9  | Malignant neoplasm of upper lip                                                         |
| Cancer                  | 140.1 | ICD9  | Malignant neoplasm of lower lip                                                         |
| Cancer                  | 140.3 | ICD9  | Malignant neoplasm of upper lip                                                         |
| Cancer                  | 140.4 | ICD9  | Malignant neoplasm of lower lip                                                         |
| Cancer                  | 140.5 | ICD9  | Malignant neoplasm of lip                                                               |
| Cancer                  | 140.6 | ICD9  | Malignant neoplasm of commissure of lip                                                 |
| Cancer                  | 140.8 | ICD9  | Malignant neoplasm of other sites of lip                                                |
| Cancer                  | 140.9 | ICD9  | Malignant neoplasm of lip                                                               |
| Cancer                  | 141   | ICD9  | Malignant neoplasm of tongue                                                            |
| Cancer                  | 141   | ICD9  | Malignant neoplasm of base of tongue                                                    |
| Cancer                  | 141.1 | ICD9  | Malignant neoplasm of dorsal surface of tongue                                          |
| Cancer                  | 141.2 | ICD9  | Malignant neoplasm of tip and lateral border of tongue                                  |
| Cancer                  | 141.3 | ICD9  | Malignant neoplasm of ventral surface of tongue                                         |
| Cancer                  | 141.4 | ICD9  | Malignant neoplasm of anterior two-thirds of tongue                                     |
| Cancer                  | 141.5 | ICD9  | Malignant neoplasm of junctional zone of tongue                                         |

|        |       |      |                                                            |
|--------|-------|------|------------------------------------------------------------|
| Cancer | 141.6 | ICD9 | Malignant neoplasm of lingual tonsil                       |
|        |       |      | Malignant neoplasm of other sites of tongue                |
| Cancer | 141.8 | ICD9 | Malignant neoplasm of tongue                               |
| Cancer | 141.9 | ICD9 | Malignant neoplasm of tongue                               |
|        |       |      | Malignant neoplasm of major salivary glands                |
| Cancer | 142   | ICD9 | Malignant neoplasm of parotid gland                        |
|        |       |      | Malignant neoplasm of submandibular gland                  |
| Cancer | 142.1 | ICD9 | Malignant neoplasm of sublingual gland                     |
| Cancer | 142.2 | ICD9 | Malignant neoplasm of other major salivary glands          |
| Cancer | 142.8 | ICD9 | Malignant neoplasm of salivary gland                       |
| Cancer | 142.9 | ICD9 | Malignant neoplasm of gum                                  |
| Cancer | 143   | ICD9 | Malignant neoplasm of upper gum                            |
| Cancer | 143   | ICD9 | Malignant neoplasm of lower gum                            |
|        |       |      | Malignant neoplasm of other sites of gum                   |
| Cancer | 143.8 | ICD9 | Malignant neoplasm of gum                                  |
| Cancer | 143.9 | ICD9 | Malignant neoplasm of floor of mouth                       |
| Cancer | 144   | ICD9 | Malignant neoplasm of anterior portion of floor of mouth   |
|        |       |      | Malignant neoplasm of lateral portion of floor of mouth    |
| Cancer | 144.1 | ICD9 | Malignant neoplasm of other sites of floor of mouth        |
| Cancer | 144.8 | ICD9 | Malignant neoplasm of floor of mouth                       |
| Cancer | 144.9 | ICD9 | Malignant neoplasm of other and unspecified parts of mouth |
| Cancer | 145   | ICD9 | Malignant neoplasm of cheek mucosa                         |
|        |       |      | Malignant neoplasm of vestibule of mouth                   |
| Cancer | 145.1 | ICD9 | Malignant neoplasm of hard palate                          |
| Cancer | 145.2 | ICD9 | Malignant neoplasm of soft palate                          |
| Cancer | 145.3 | ICD9 | Malignant neoplasm of uvula                                |
| Cancer | 145.4 | ICD9 | Malignant neoplasm of palate                               |
| Cancer | 145.5 | ICD9 | Malignant neoplasm of retromolar area                      |
|        |       |      | Malignant neoplasm of other specified parts of mouth       |
| Cancer | 145.8 | ICD9 | Malignant neoplasm of mouth                                |
| Cancer | 145.9 | ICD9 | Malignant neoplasm of mouth                                |

|        |       |      |                                                                |
|--------|-------|------|----------------------------------------------------------------|
| Cancer | 146   | ICD9 | Malignant neoplasm of oropharynx                               |
| Cancer | 146   | ICD9 | Malignant neoplasm of tonsil                                   |
| Cancer | 146.1 | ICD9 | Malignant neoplasm of tonsillar fossa                          |
| Cancer | 146.2 | ICD9 | Malignant neoplasm of tonsillar pillars (anterior) (posterior) |
| Cancer | 146.3 | ICD9 | Malignant neoplasm of vallecula                                |
| Cancer | 146.4 | ICD9 | Malignant neoplasm of anterior aspect of epiglottis            |
| Cancer | 146.5 | ICD9 | Malignant neoplasm of junctional region of oropharynx          |
| Cancer | 146.6 | ICD9 | Malignant neoplasm of lateral wall of oropharynx               |
| Cancer | 146.7 | ICD9 | Malignant neoplasm of posterior wall of oropharynx             |
| Cancer | 146.8 | ICD9 | Malignant neoplasm of other specified sites of oropharynx      |
| Cancer | 146.9 | ICD9 | Malignant neoplasm of oropharynx                               |
| Cancer | 147   | ICD9 | Malignant neoplasm of nasopharynx                              |
| Cancer | 147   | ICD9 | Malignant neoplasm of superior wall of nasopharynx             |
| Cancer | 147.1 | ICD9 | Malignant neoplasm of posterior wall of nasopharynx            |
| Cancer | 147.2 | ICD9 | Malignant neoplasm of lateral wall of nasopharynx              |
| Cancer | 147.3 | ICD9 | Malignant neoplasm of anterior wall of nasopharynx             |
| Cancer | 147.8 | ICD9 | Malignant neoplasm of other specified sites of nasopharynx     |
| Cancer | 147.9 | ICD9 | Malignant neoplasm of nasopharynx                              |
| Cancer | 148   | ICD9 | Malignant neoplasm of hypopharynx                              |
| Cancer | 148   | ICD9 | Malignant neoplasm of postcricoid region of hypopharynx        |
| Cancer | 148.1 | ICD9 | Malignant neoplasm of pyriform sinus                           |
| Cancer | 148.2 | ICD9 | Malignant neoplasm of aryepiglottic fold                       |
| Cancer | 148.3 | ICD9 | Malignant neoplasm of posterior hypopharyngeal wall            |
| Cancer | 148.8 | ICD9 | Malignant neoplasm of other specified sites of hypopharynx     |
| Cancer | 148.9 | ICD9 | Malignant neoplasm of hypopharynx                              |

|        |       |      |                                                                        |
|--------|-------|------|------------------------------------------------------------------------|
| Cancer | 149   | ICD9 | Malignant neoplasm of other and ill-defined sites within the lip       |
| Cancer | 149   | ICD9 | Malignant neoplasm of pharynx                                          |
| Cancer | 149.1 | ICD9 | Malignant neoplasm of waldeyer's ring                                  |
| Cancer | 149.8 | ICD9 | Malignant neoplasm of other sites within the lip and oral cavity       |
| Cancer | 149.9 | ICD9 | Malignant neoplasm of ill-defined sites within the lip and oral cavity |
| Cancer | 150   | ICD9 | Malignant neoplasm of esophagus                                        |
| Cancer | 150   | ICD9 | Malignant neoplasm of cervical esophagus                               |
| Cancer | 150.1 | ICD9 | Malignant neoplasm of thoracic esophagus                               |
| Cancer | 150.2 | ICD9 | Malignant neoplasm of abdominal esophagus                              |
| Cancer | 150.3 | ICD9 | Malignant neoplasm of upper third of esophagus                         |
| Cancer | 150.4 | ICD9 | Malignant neoplasm of middle third of esophagus                        |
| Cancer | 150.5 | ICD9 | Malignant neoplasm of lower third of esophagus                         |
| Cancer | 150.8 | ICD9 | Malignant neoplasm of other specified part of esophagus                |
| Cancer | 150.9 | ICD9 | Malignant neoplasm of esophagus                                        |
| Cancer | 151   | ICD9 | Malignant neoplasm of stomach                                          |
| Cancer | 151   | ICD9 | Malignant neoplasm of cardia                                           |
| Cancer | 151.1 | ICD9 | Malignant neoplasm of pylorus                                          |
| Cancer | 151.2 | ICD9 | Malignant neoplasm of pyloric antrum                                   |
| Cancer | 151.3 | ICD9 | Malignant neoplasm of fundus of stomach                                |
| Cancer | 151.4 | ICD9 | Malignant neoplasm of body of stomach                                  |
| Cancer | 151.5 | ICD9 | Malignant neoplasm of lesser curvature of stomach                      |
| Cancer | 151.6 | ICD9 | Malignant neoplasm of greater curvature of stomach                     |
| Cancer | 151.8 | ICD9 | Malignant neoplasm of other specified sites of stomach                 |
| Cancer | 151.9 | ICD9 | Malignant neoplasm of stomach                                          |
| Cancer | 153   | ICD9 | Malignant neoplasm of colon                                            |
| Cancer | 153   | ICD9 | Malignant neoplasm of hepatic flexure                                  |

|        |       |      |                                                                |
|--------|-------|------|----------------------------------------------------------------|
| Cancer | 153.1 | ICD9 | Malignant neoplasm of transverse colon                         |
| Cancer | 153.2 | ICD9 | Malignant neoplasm of descending colon                         |
| Cancer | 153.3 | ICD9 | Malignant neoplasm of sigmoid colon                            |
| Cancer | 153.4 | ICD9 | Malignant neoplasm of cecum                                    |
| Cancer | 153.5 | ICD9 | Malignant neoplasm of appendix vermiformis                     |
| Cancer | 153.6 | ICD9 | Malignant neoplasm of ascending colon                          |
| Cancer | 153.7 | ICD9 | Malignant neoplasm of splenic flexure                          |
| Cancer | 153.8 | ICD9 | Malignant neoplasm of other specified sites of large intestine |
| Cancer | 153.9 | ICD9 | Malignant neoplasm of colon                                    |
| Cancer | 154.8 | ICD9 | Malignant neoplasm of other sites of rectum                    |
| Cancer | 155   | ICD9 | Malignant neoplasm of liver and intrahepatic bile ducts        |
| Cancer | 155.1 | ICD9 | Malignant neoplasm of intrahepatic bile ducts                  |
| Cancer | 155.2 | ICD9 | Malignant neoplasm of liver                                    |
| Cancer | 157   | ICD9 | Malignant neoplasm of pancreas                                 |
| Cancer | 157   | ICD9 | Malignant neoplasm of head of pancreas                         |
| Cancer | 157.1 | ICD9 | Malignant neoplasm of body of pancreas                         |
| Cancer | 157.2 | ICD9 | Malignant neoplasm of tail of pancreas                         |
| Cancer | 157.3 | ICD9 | Malignant neoplasm of pancreatic duct                          |
| Cancer | 157.4 | ICD9 | Malignant neoplasm of islets of Langerhans                     |
| Cancer | 157.8 | ICD9 | Malignant neoplasm of other specified sites of pancreas        |
| Cancer | 157.9 | ICD9 | Malignant neoplasm of pancreas                                 |
| Cancer | 159   | ICD9 | Malignant neoplasm of intestinal tract                         |
| Cancer | 160   | ICD9 | Malignant neoplasm of nasal cavities                           |
| Cancer | 160   | ICD9 | Malignant neoplasm of nasal cavities                           |
| Cancer | 160.1 | ICD9 | Malignant neoplasm of auditory tube                            |
| Cancer | 160.2 | ICD9 | Malignant neoplasm of maxillary sinus                          |
| Cancer | 160.3 | ICD9 | Malignant neoplasm of ethmoidal sinus                          |
| Cancer | 160.4 | ICD9 | Malignant neoplasm of frontal sinus                            |
| Cancer | 160.5 | ICD9 | Malignant neoplasm of sphenoidal sinus                         |
| Cancer | 160.8 | ICD9 | Malignant neoplasm of other accessory sinuses                  |
| Cancer | 160.9 | ICD9 | Malignant neoplasm of accessory sinus                          |
| Cancer | 161   | ICD9 | Malignant neoplasm of larynx                                   |

|        |       |      |                                                                                                          |
|--------|-------|------|----------------------------------------------------------------------------------------------------------|
| Cancer | 161   | ICD9 | Malignant neoplasm of glottis                                                                            |
| Cancer | 161.1 | ICD9 | Malignant neoplasm of supraglottis                                                                       |
| Cancer | 161.2 | ICD9 | Malignant neoplasm of subglottis                                                                         |
| Cancer | 161.3 | ICD9 | Malignant neoplasm of laryngeal cartilages                                                               |
| Cancer | 161.8 | ICD9 | Malignant neoplasm of other specified sites of larynx                                                    |
| Cancer | 161.9 | ICD9 | Malignant neoplasm of larynx                                                                             |
| Cancer | 162   | ICD9 | Malignant neoplasm of trachea                                                                            |
| Cancer | 162   | ICD9 | Malignant neoplasm of trachea                                                                            |
| Cancer | 162.2 | ICD9 | Malignant neoplasm of main bronchus                                                                      |
| Cancer | 162.3 | ICD9 | Malignant neoplasm of upper lobe                                                                         |
| Cancer | 162.4 | ICD9 | Malignant neoplasm of middle lobe                                                                        |
| Cancer | 162.5 | ICD9 | Malignant neoplasm of lower lobe                                                                         |
| Cancer | 162.8 | ICD9 | Malignant neoplasm of other parts of bronchus or lung                                                    |
| Cancer | 162.9 | ICD9 | Malignant neoplasm of bronchus and lung                                                                  |
| Cancer | 163   | ICD9 | Malignant neoplasm of pleura                                                                             |
| Cancer | 163   | ICD9 | Malignant neoplasm of parietal pleura                                                                    |
| Cancer | 163.1 | ICD9 | Malignant neoplasm of visceral pleura                                                                    |
| Cancer | 163.8 | ICD9 | Malignant neoplasm of other specified sites of pleura                                                    |
| Cancer | 163.9 | ICD9 | Malignant neoplasm of pleura                                                                             |
| Cancer | 164   | ICD9 | Malignant neoplasm of thymus                                                                             |
| Cancer | 164   | ICD9 | Malignant neoplasm of thymus                                                                             |
| Cancer | 164.1 | ICD9 | Malignant neoplasm of heart                                                                              |
| Cancer | 164.2 | ICD9 | Malignant neoplasm of anterior mediastinum                                                               |
| Cancer | 164.3 | ICD9 | Malignant neoplasm of posterior mediastinum                                                              |
| Cancer | 164.8 | ICD9 | Malignant neoplasm of other parts of mediastinum                                                         |
| Cancer | 164.9 | ICD9 | Malignant neoplasm of mediastinum                                                                        |
| Cancer | 165   | ICD9 | Malignant neoplasm of other and ill-defined sites within the respiratory system and intrathoracic organs |
| Cancer | 165   | ICD9 | Malignant neoplasm of upper respiratory tract                                                            |



|        |       |      |                                                                                          |
|--------|-------|------|------------------------------------------------------------------------------------------|
| Cancer | 165.8 | ICD9 | Malignant neoplasm of other sites within the respiratory system and intrathoracic organs |
| Cancer | 165.9 | ICD9 | Malignant neoplasm of ill-defined sites within the respiratory system                    |
| Cancer | 170   | ICD9 | Malignant neoplasm of bone and articular cartilage                                       |
| Cancer | 170   | ICD9 | Malignant neoplasm of bones of skull and face                                            |
| Cancer | 170.1 | ICD9 | Malignant neoplasm of mandible                                                           |
| Cancer | 170.2 | ICD9 | Malignant neoplasm of vertebral column                                                   |
| Cancer | 170.3 | ICD9 | Malignant neoplasm of ribs                                                               |
| Cancer | 170.4 | ICD9 | Malignant neoplasm of scapula and long bones of upper limb                               |
| Cancer | 170.5 | ICD9 | Malignant neoplasm of short bones of upper limb                                          |
| Cancer | 170.6 | ICD9 | Malignant neoplasm of pelvic bones                                                       |
| Cancer | 170.7 | ICD9 | Malignant neoplasm of long bones of lower limb                                           |
| Cancer | 170.8 | ICD9 | Malignant neoplasm of short bones of lower limb                                          |
| Cancer | 170.9 | ICD9 | Malignant neoplasm of bone and articular cartilage                                       |
| Cancer | 171   | ICD9 | Malignant neoplasm of connective and other soft tissue                                   |
| Cancer | 171   | ICD9 | Malignant neoplasm of connective and other soft tissue of head                           |
| Cancer | 171.2 | ICD9 | Malignant neoplasm of connective and other soft tissue of upper limb                     |
| Cancer | 171.3 | ICD9 | Malignant neoplasm of connective and other soft tissue of lower limb                     |
| Cancer | 171.4 | ICD9 | Malignant neoplasm of connective and other soft tissue of thorax                         |
| Cancer | 171.5 | ICD9 | Malignant neoplasm of connective and other soft tissue of abdomen                        |
| Cancer | 171.6 | ICD9 | Malignant neoplasm of connective and other soft tissue of pelvis                         |
| Cancer | 171.7 | ICD9 | Malignant neoplasm of connective and other soft tissue of trunk                          |

|        |        |      |                                                                                   |
|--------|--------|------|-----------------------------------------------------------------------------------|
| Cancer | 171.8  | ICD9 | Malignant neoplasm of other specified sites of connective and other soft tissue   |
| Cancer | 171.9  | ICD9 | Malignant neoplasm of connective and other soft tissue                            |
| Cancer | 173    | ICD9 | Other malignant neoplasm of skin                                                  |
| Cancer | 173    | ICD9 | Other malignant neoplasm of skin of lip                                           |
| Cancer | 173    | ICD9 | Unspecified malignant neoplasm of skin of lip                                     |
| Cancer | 173.09 | ICD9 | Other specified malignant neoplasm of skin of lip                                 |
| Cancer | 173.1  | ICD9 | Other malignant neoplasm of skin of eyelid                                        |
| Cancer | 173.1  | ICD9 | Unspecified malignant neoplasm of eyelid                                          |
| Cancer | 173.19 | ICD9 | Other specified malignant neoplasm of eyelid                                      |
| Cancer | 173.2  | ICD9 | Other malignant neoplasm of skin of ear and external auditory canal               |
| Cancer | 173.2  | ICD9 | Unspecified malignant neoplasm of skin of ear and external auditory canal         |
| Cancer | 173.29 | ICD9 | Other specified malignant neoplasm of skin of ear and external auditory canal     |
| Cancer | 173.3  | ICD9 | Other malignant neoplasm of skin of other and unspecified parts of face           |
| Cancer | 173.3  | ICD9 | Unspecified malignant neoplasm of skin of other and unspecified parts of face     |
| Cancer | 173.39 | ICD9 | Other specified malignant neoplasm of skin of other and unspecified parts of face |
| Cancer | 173.4  | ICD9 | Other malignant neoplasm of scalp and skin of neck                                |
| Cancer | 173.4  | ICD9 | Unspecified malignant neoplasm of scalp and skin of neck                          |
| Cancer | 173.49 | ICD9 | Other specified malignant neoplasm of scalp and skin of neck                      |
| Cancer | 173.5  | ICD9 | Other malignant neoplasm of skin of trunk                                         |
| Cancer | 173.5  | ICD9 | Unspecified malignant neoplasm of skin of trunk                                   |

|        |        |      |                                                                     |
|--------|--------|------|---------------------------------------------------------------------|
| Cancer | 173.59 | ICD9 | Other specified malignant neoplasm of skin of trunk                 |
| Cancer | 173.6  | ICD9 | Other malignant neoplasm of skin of upper limb                      |
| Cancer | 173.6  | ICD9 | Unspecified malignant neoplasm of skin of upper limb                |
| Cancer | 173.69 | ICD9 | Other specified malignant neoplasm of skin of upper limb            |
| Cancer | 173.7  | ICD9 | Other malignant neoplasm of skin of lower limb                      |
| Cancer | 173.7  | ICD9 | Unspecified malignant neoplasm of skin of lower limb                |
| Cancer | 173.79 | ICD9 | Other specified malignant neoplasm of skin of lower limb            |
| Cancer | 173.8  | ICD9 | Other malignant neoplasm of other specified sites of skin           |
| Cancer | 173.8  | ICD9 | Unspecified malignant neoplasm of other specified sites of skin     |
| Cancer | 173.89 | ICD9 | Other specified malignant neoplasm of other specified sites of skin |
| Cancer | 173.9  | ICD9 | Other malignant neoplasm of skin                                    |
| Cancer | 173.9  | ICD9 | Unspecified malignant neoplasm of skin                              |
| Cancer | 173.99 | ICD9 | Other specified malignant neoplasm of skin                          |
| Cancer | 175    | ICD9 | Malignant neoplasm of male breast                                   |
| Cancer | 175    | ICD9 | Malignant neoplasm of nipple and areola of male breast              |
| Cancer | 175.9  | ICD9 | Malignant neoplasm of other and unspecified sites of male breast    |
| Cancer | 180    | ICD9 | Malignant neoplasm of cervix uteri                                  |
| Cancer | 180    | ICD9 | Malignant neoplasm of endocervix                                    |
| Cancer | 180.1  | ICD9 | Malignant neoplasm of exocervix                                     |
| Cancer | 180.8  | ICD9 | Malignant neoplasm of other specified sites of cervix               |
| Cancer | 180.9  | ICD9 | Malignant neoplasm of cervix uteri                                  |
| Cancer | 184    | ICD9 | Malignant neoplasm of vagina                                        |
| Cancer | 184.1  | ICD9 | Malignant neoplasm of labia majora                                  |
| Cancer | 184.2  | ICD9 | Malignant neoplasm of labia minora                                  |
| Cancer | 184.3  | ICD9 | Malignant neoplasm of clitoris                                      |
| Cancer | 184.4  | ICD9 | Malignant neoplasm of vulva                                         |

|        |       |      |                                                                     |
|--------|-------|------|---------------------------------------------------------------------|
| Cancer | 185   | ICD9 | Malignant neoplasm of prostate                                      |
|        |       |      | Malignant neoplasm of penis and other male genital organs           |
| Cancer | 187   | ICD9 |                                                                     |
| Cancer | 190   | ICD9 | Malignant neoplasm of eye                                           |
| Cancer | 190   | ICD9 | Malignant neoplasm of eyeball                                       |
| Cancer | 190.1 | ICD9 | Malignant neoplasm of orbit                                         |
| Cancer | 190.2 | ICD9 | Malignant neoplasm of lacrimal gland                                |
| Cancer | 190.3 | ICD9 | Malignant neoplasm of conjunctiva                                   |
| Cancer | 190.4 | ICD9 | Malignant neoplasm of cornea                                        |
| Cancer | 190.5 | ICD9 | Malignant neoplasm of retina                                        |
| Cancer | 190.6 | ICD9 | Malignant neoplasm of choroid                                       |
| Cancer | 190.7 | ICD9 | Malignant neoplasm of lacrimal duct                                 |
|        |       |      | Malignant neoplasm of other specified sites of eye                  |
| Cancer | 190.8 | ICD9 |                                                                     |
| Cancer | 190.9 | ICD9 | Malignant neoplasm of eye                                           |
| Cancer | 191   | ICD9 | Malignant neoplasm of brain                                         |
| Cancer | 191   | ICD9 | Malignant neoplasm of cerebrum                                      |
| Cancer | 191.1 | ICD9 | Malignant neoplasm of frontal lobe                                  |
| Cancer | 191.2 | ICD9 | Malignant neoplasm of temporal lobe                                 |
| Cancer | 191.3 | ICD9 | Malignant neoplasm of parietal lobe                                 |
| Cancer | 191.4 | ICD9 | Malignant neoplasm of occipital lobe                                |
| Cancer | 191.5 | ICD9 | Malignant neoplasm of ventricles                                    |
| Cancer | 191.6 | ICD9 | Malignant neoplasm of cerebellum NOS                                |
| Cancer | 191.7 | ICD9 | Malignant neoplasm of brain stem                                    |
|        |       |      | Malignant neoplasm of other parts of brain                          |
| Cancer | 191.8 | ICD9 |                                                                     |
| Cancer | 191.9 | ICD9 | Malignant neoplasm of brain                                         |
|        |       |      | Malignant neoplasm of other and unspecified parts of nervous system |
| Cancer | 192   | ICD9 |                                                                     |
| Cancer | 192   | ICD9 | Malignant neoplasm of cranial nerves                                |
|        |       |      |                                                                     |
| Cancer | 192.1 | ICD9 | Malignant neoplasm of cerebral meninges                             |
| Cancer | 192.2 | ICD9 | Malignant neoplasm of spinal cord                                   |
| Cancer | 192.3 | ICD9 | Malignant neoplasm of spinal meninges                               |
|        |       |      | Malignant neoplasm of other specified sites of nervous system       |
| Cancer | 192.8 | ICD9 |                                                                     |
| Cancer | 192.9 | ICD9 | Malignant neoplasm of nervous system                                |
| Cancer | 193   | ICD9 | Malignant neoplasm of thyroid gland                                 |
|        |       |      | Malignant neoplasm of other endocrine glands and related structures |
| Cancer | 194   | ICD9 |                                                                     |

|        |        |      |                                                                                 |
|--------|--------|------|---------------------------------------------------------------------------------|
| Cancer | 194    | ICD9 | Malignant neoplasm of adrenal gland                                             |
| Cancer | 194.1  | ICD9 | Malignant neoplasm of parathyroid gland                                         |
| Cancer | 194.3  | ICD9 | Malignant neoplasm of pituitary gland and craniopharyngeal duct                 |
| Cancer | 194.4  | ICD9 | Malignant neoplasm of pineal gland                                              |
| Cancer | 194.5  | ICD9 | Malignant neoplasm of carotid body                                              |
| Cancer | 194.6  | ICD9 | Malignant neoplasm of aortic body and other paraganglia                         |
| Cancer | 194.8  | ICD9 | Malignant neoplasm of other endocrine glands and related structures             |
| Cancer | 194.9  | ICD9 | Malignant neoplasm of endocrine gland                                           |
| Cancer | 195.1  | ICD9 | Malignant neoplasm of thorax                                                    |
| Cancer | 202    | ICD9 | Other malignant neoplasms of lymphoid and histiocytic tissue                    |
| Cancer | 202.3  | ICD9 | Malignant histiocytosis                                                         |
| Cancer | 202.3  | ICD9 | Malignant histiocytosis                                                         |
| Cancer | 202.31 | ICD9 | Malignant histiocytosis involving lymph nodes of head                           |
| Cancer | 202.32 | ICD9 | Malignant histiocytosis involving intrathoracic lymph nodes                     |
| Cancer | 202.33 | ICD9 | Malignant histiocytosis involving intra-abdominal lymph nodes                   |
| Cancer | 202.34 | ICD9 | Malignant histiocytosis involving lymph nodes of axilla and upper limb          |
| Cancer | 202.35 | ICD9 | Malignant histiocytosis involving lymph nodes of inguinal region and lower limb |
| Cancer | 202.36 | ICD9 | Malignant histiocytosis involving intrapelvic lymph nodes                       |
| Cancer | 202.37 | ICD9 | Malignant histiocytosis involving spleen                                        |
| Cancer | 202.38 | ICD9 | Malignant histiocytosis involving lymph nodes of multiple sites                 |
| Cancer | 202.5  | ICD9 | Letterer-Siwe disease                                                           |
| Cancer | 202.5  | ICD9 | Letterer-Siwe disease                                                           |
| Cancer | 202.51 | ICD9 | Letterer-Siwe disease involving lymph nodes of head                             |
| Cancer | 202.52 | ICD9 | Letterer-Siwe disease involving intrathoracic lymph nodes                       |
| Cancer | 202.53 | ICD9 | Letterer-Siwe disease involving intra-abdominal lymph nodes                     |

|        |        |      |                                                                                    |
|--------|--------|------|------------------------------------------------------------------------------------|
| Cancer | 202.54 | ICD9 | Letterer-Siwe disease involving lymph nodes of axilla and upper limb               |
| Cancer | 202.55 | ICD9 | Letterer-Siwe disease involving lymph nodes of inguinal region and lower limb      |
| Cancer | 202.56 | ICD9 | Letterer-Siwe disease involving intrapelvic lymph nodes                            |
| Cancer | 202.57 | ICD9 | Letterer-Siwe disease involving spleen                                             |
| Cancer | 202.58 | ICD9 | Letterer-Siwe disease involving lymph nodes of multiple sites                      |
| Cancer | 202.6  | ICD9 | Malignant mast cell tumors                                                         |
| Cancer | 202.6  | ICD9 | Malignant mast cell tumors                                                         |
| Cancer | 202.61 | ICD9 | Malignant mast cell tumors involving lymph nodes of head                           |
| Cancer | 202.62 | ICD9 | Malignant mast cell tumors involving intrathoracic lymph nodes                     |
| Cancer | 202.63 | ICD9 | Malignant mast cell tumors involving intra-abdominal lymph nodes                   |
| Cancer | 202.64 | ICD9 | Malignant mast cell tumors involving lymph nodes of axilla and upper limb          |
| Cancer | 202.65 | ICD9 | Malignant mast cell tumors involving lymph nodes of inguinal region and lower limb |
| Cancer | 202.66 | ICD9 | Malignant mast cell tumors involving intrapelvic lymph nodes                       |
| Cancer | 202.67 | ICD9 | Malignant mast cell tumors involving spleen                                        |
| Cancer | 202.68 | ICD9 | Malignant mast cell tumors involving lymph nodes of multiple sites                 |
| Cancer | 209.1  | ICD9 | Malignant carcinoid tumors of the appendix                                         |
| Cancer | 209.1  | ICD9 | Malignant carcinoid tumor of the large intestine                                   |
| Cancer | 209.11 | ICD9 | Malignant carcinoid tumor of the appendix                                          |
| Cancer | 209.12 | ICD9 | Malignant carcinoid tumor of the cecum                                             |
| Cancer | 209.13 | ICD9 | Malignant carcinoid tumor of the ascending colon                                   |
| Cancer | 209.14 | ICD9 | Malignant carcinoid tumor of the transverse colon                                  |

|        |        |      |                                                           |
|--------|--------|------|-----------------------------------------------------------|
| Cancer | 209.15 | ICD9 | Malignant carcinoid tumor of the descending colon         |
| Cancer | 209.16 | ICD9 | Malignant carcinoid tumor of the sigmoid colon            |
| Cancer | 209.2  | ICD9 | Malignant carcinoid tumors of other and unspecified sites |
| Cancer | 209.2  | ICD9 | Malignant carcinoid tumor of unknown primary site         |
| Cancer | 209.21 | ICD9 | Malignant carcinoid tumor of the bronchus and lung        |
| Cancer | 209.22 | ICD9 | Malignant carcinoid tumor of the thymus                   |
| Cancer | 209.23 | ICD9 | Malignant carcinoid tumor of the stomach                  |
| Cancer | 209.24 | ICD9 | Malignant carcinoid tumor of the kidney                   |
| Cancer | 209.29 | ICD9 | Malignant carcinoid tumors of other sites                 |
| Cancer | 209.3  | ICD9 | Malignant poorly differentiated neuroendocrine tumors     |
| Cancer | 209.3  | ICD9 | Malignant poorly differentiated neuroendocrine carcinoma  |
| Cancer | 209.31 | ICD9 | Merkel cell carcinoma of the face (ADDED)                 |
| Cancer | 209.32 | ICD9 | Merkel cell carcinoma of the scalp & neck (ADDED)         |
| Cancer | 209.33 | ICD9 | Merkel cell carcinoma of the upper limb (ADDED)           |
| Cancer | 209.34 | ICD9 | Merkel cell carcinoma of the lower limb (ADDED)           |
| Cancer | 209.35 | ICD9 | Merkel cell carcinoma of the trunk (ADDED)                |
| Cancer | 209.36 | ICD9 | Merkel cell carcinoma of other sites (ADDED)              |
| Cancer | 209.7  | ICD9 | Secondary neuroendocrine tumor                            |
| Cancer | 209.75 | ICD9 | Merkel cell carcinoma                                     |
| Cancer | 230    | ICD9 | Carcinoma in situ of lip                                  |
| Cancer | 230.1  | ICD9 | Carcinoma in situ of esophagus                            |
| Cancer | 230.2  | ICD9 | Carcinoma in situ of stomach                              |
| Cancer | 230.3  | ICD9 | Carcinoma in situ of colon                                |
| Cancer | 230.8  | ICD9 | Carcinoma in situ of liver and biliary system             |

|    |        |        |      |                                            |
|----|--------|--------|------|--------------------------------------------|
| 1  |        |        |      |                                            |
| 2  |        |        |      |                                            |
| 3  | Cancer | 231    | ICD9 | Carcinoma in situ of respiratory system    |
| 4  | Cancer | 231    | ICD9 | Carcinoma in situ of larynx                |
| 5  | Cancer | 231.1  | ICD9 | Carcinoma in situ of trachea               |
| 6  | Cancer | 231.2  | ICD9 | Carcinoma in situ of bronchus and lung     |
| 7  |        |        |      | Carcinoma in situ of other specified parts |
| 8  |        |        |      | of respiratory system                      |
| 9  | Cancer | 231.8  | ICD9 | Carcinoma in situ of respiratory system    |
| 10 | Cancer | 231.9  | ICD9 | Carcinoma in situ of respiratory system    |
| 11 | Cancer | 232    | ICD9 | Carcinoma in situ of skin                  |
| 12 |        |        |      | Carcinoma in situ of breast and            |
| 13 | Cancer | 233    | ICD9 | genitourinary system                       |
| 14 | Cancer | 233    | ICD9 | Carcinoma in situ of breast                |
| 15 |        |        |      | Carcinoma in situ of other and unspecified |
| 16 | Cancer | 233.3  | ICD9 | female genital organs                      |
| 17 |        |        |      | Carcinoma in situ of unspecified female    |
| 18 | Cancer | 233.3  | ICD9 | genital organ                              |
| 19 | Cancer | 233.31 | ICD9 | Carcinoma in situ of vagina                |
| 20 | Cancer | 233.32 | ICD9 | Carcinoma in situ of vulva                 |
| 21 |        |        |      | Carcinoma in situ of other female genital  |
| 22 | Cancer | 233.39 | ICD9 | organ                                      |
| 23 | Cancer | 233.4  | ICD9 | Carcinoma in situ of prostate              |
| 24 | Cancer | 233.5  | ICD9 | Carcinoma in situ of penis                 |
| 25 |        |        |      | Carcinoma in situ of other and unspecified |
| 26 | Cancer | 233.6  | ICD9 | male genital organs                        |
| 27 | Cancer | 233.7  | ICD9 | Carcinoma in situ of bladder               |
| 28 |        |        |      | Carcinoma in situ of other and unspecified |
| 29 | Cancer | 233.9  | ICD9 | urinary organs                             |
| 30 |        |        |      | Carcinoma in situ of other and unspecified |
| 31 | Cancer | 234    | ICD9 | sites                                      |
| 32 | Cancer | 234    | ICD9 | Carcinoma in situ of eye                   |
| 33 | Cancer | 234.8  | ICD9 | Carcinoma in situ of other specified sites |
| 34 | Cancer | 234.9  | ICD9 | Carcinoma in situ                          |
| 35 |        |        |      |                                            |
| 36 | Cancer | 236    | ICD9 | Neoplasm of uncertain behavior of uterus   |
| 37 |        |        |      | Neoplasm of uncertain behavior of          |
| 38 | Cancer | 236.1  | ICD9 | placenta                                   |
| 39 | Cancer | 236.2  | ICD9 | Neoplasm of uncertain behavior of ovary    |
| 40 |        |        |      | Neoplasm of uncertain behavior of other    |
| 41 | Cancer | 236.3  | ICD9 | and unspecified female genital organs      |
| 42 |        |        |      | Neoplasm of uncertain behavior of          |
| 43 | Cancer | 236.7  | ICD9 | bladder                                    |
| 44 |        |        |      |                                            |
| 45 |        |        |      |                                            |
| 46 |        |        |      |                                            |
| 47 |        |        |      |                                            |
| 48 |        |        |      |                                            |
| 49 |        |        |      |                                            |
| 50 |        |        |      |                                            |
| 51 |        |        |      |                                            |
| 52 |        |        |      |                                            |
| 53 |        |        |      |                                            |
| 54 |        |        |      |                                            |
| 55 |        |        |      |                                            |
| 56 |        |        |      |                                            |
| 57 |        |        |      |                                            |
| 58 |        |        |      |                                            |
| 59 |        |        |      |                                            |
| 60 |        |        |      |                                            |



|        |        |       |                                                                                      |
|--------|--------|-------|--------------------------------------------------------------------------------------|
| Cancer | 239.4  | ICD9  | Neoplasm of unspecified nature of bladder                                            |
| Cancer | 338.3  | ICD9  | Neoplasm related pain (acute) (chronic)                                              |
| Cancer | 795.82 | ICD9  | Elevated cancer antigen 125 [CA 125]                                                 |
| Cancer | V10.01 | ICD10 | Personal history of malignant neoplasm of tongue                                     |
| Cancer | V10.03 | ICD10 | Personal history of malignant neoplasm of esophagus                                  |
| Cancer | V10.04 | ICD10 | Personal history of malignant neoplasm of stomach                                    |
| Cancer | V10.05 | ICD10 | Personal history of malignant neoplasm of large intestine                            |
| Cancer | V10.1  | ICD10 | Personal history of malignant neoplasm of trachea                                    |
| Cancer | V10.11 | ICD10 | Personal history of malignant neoplasm of bronchus and lung                          |
| Cancer | V10.12 | ICD10 | Personal history of malignant neoplasm of trachea                                    |
| Cancer | V10.2  | ICD10 | Personal history of malignant neoplasm of other respiratory and intrathoracic organs |
| Cancer | V10.20 | ICD10 | Personal history of malignant neoplasm of unspecified respiratory organ              |
| Cancer | V10.21 | ICD10 | Personal history of malignant neoplasm of larynx                                     |
| Cancer | V10.22 | ICD10 | Personal history of malignant neoplasm of nasal cavities                             |
| Cancer | V10.29 | ICD10 | Personal history of malignant neoplasm of other respiratory and intrathoracic organs |
| Cancer | V10.41 | ICD10 | Personal history of malignant neoplasm of cervix uteri                               |
| Cancer | V10.46 | ICD10 | Personal history of malignant neoplasm of prostate                                   |
| Cancer | V10.48 | ICD10 | Personal history of malignant neoplasm of epididymis                                 |
| Cancer | V10.52 | ICD10 | Personal history of malignant neoplasm of kidney                                     |
| Cancer | V10.7  | ICD10 | Personal history of other lymphatic and hematopoietic neoplasms                      |

|        |        |       |                                                                                         |
|--------|--------|-------|-----------------------------------------------------------------------------------------|
| Cancer | V10.79 | ICD10 | Personal history of other lymphatic and hematopoietic neoplasms                         |
| Cancer | V10.81 | ICD10 | Personal history of malignant neoplasm of bone                                          |
| Cancer | V10.83 | ICD10 | Personal history of other malignant neoplasm of skin                                    |
| Cancer | V10.84 | ICD10 | Personal history of malignant neoplasm of eye                                           |
| Cancer | V10.85 | ICD10 | Personal history of malignant neoplasm of brain                                         |
| Cancer | V10.86 | ICD10 | Personal history of malignant neoplasm of other parts of nervous system                 |
| Cancer | V10.87 | ICD10 | Personal history of malignant neoplasm of thyroid                                       |
| Cancer | V10.88 | ICD10 | Personal history of malignant neoplasm of other endocrine glands and related structures |
| Cancer | C00    | ICD10 | Malignant neoplasm of lip                                                               |
| Cancer | C00.0  | ICD10 | Malignant neoplasm of external upper lip                                                |
| Cancer | C00.1  | ICD10 | Malignant neoplasm of external lower lip                                                |
| Cancer | C00.2  | ICD10 | Malignant neoplasm of external lip                                                      |
| Cancer | C00.3  | ICD10 | Malignant neoplasm of upper lip                                                         |
| Cancer | C00.4  | ICD10 | Malignant neoplasm of lower lip                                                         |
| Cancer | C00.5  | ICD10 | Malignant neoplasm of lip                                                               |
| Cancer | C00.6  | ICD10 | Malignant neoplasm of commissure of lip                                                 |
| Cancer | C00.8  | ICD10 | Malignant neoplasm of overlapping sites of lip                                          |
| Cancer | C00.9  | ICD10 | Malignant neoplasm of lip                                                               |
| Cancer | C01    | ICD10 | Malignant neoplasm of base of tongue                                                    |
| Cancer | C02    | ICD10 | Malignant neoplasm of other and unspecified parts of tongue                             |
| Cancer | C02.0  | ICD10 | Malignant neoplasm of dorsal surface of tongue                                          |
| Cancer | C02.1  | ICD10 | Malignant neoplasm of border of tongue                                                  |
| Cancer | C02.2  | ICD10 | Malignant neoplasm of ventral surface of tongue                                         |

|        |        |       |                                                                                 |
|--------|--------|-------|---------------------------------------------------------------------------------|
| Cancer | C02.3  | ICD10 | Malignant neoplasm of anterior two-thirds of tongue                             |
| Cancer | C02.4  | ICD10 | Malignant neoplasm of lingual tonsil                                            |
| Cancer | C02.8  | ICD10 | Malignant neoplasm of overlapping sites of tongue                               |
| Cancer | C02.9  | ICD10 | Malignant neoplasm of tongue                                                    |
| Cancer | C03    | ICD10 | Malignant neoplasm of gum                                                       |
| Cancer | C03.0  | ICD10 | Malignant neoplasm of upper gum                                                 |
| Cancer | C03.1  | ICD10 | Malignant neoplasm of lower gum                                                 |
| Cancer | C03.9  | ICD10 | Malignant neoplasm of gum                                                       |
| Cancer | C04    | ICD10 | Malignant neoplasm of floor of mouth                                            |
| Cancer | C04.0  | ICD10 | Malignant neoplasm of anterior floor of mouth                                   |
| Cancer | C04.1  | ICD10 | Malignant neoplasm of lateral floor of mouth                                    |
| Cancer | C04.8  | ICD10 | Malignant neoplasm of overlapping sites of floor of mouth                       |
| Cancer | C04.9  | ICD10 | Malignant neoplasm of floor of mouth                                            |
| Cancer | C05    | ICD10 | Malignant neoplasm of palate                                                    |
| Cancer | C05.0  | ICD10 | Malignant neoplasm of hard palate                                               |
| Cancer | C05.1  | ICD10 | Malignant neoplasm of soft palate                                               |
| Cancer | C05.2  | ICD10 | Malignant neoplasm of uvula                                                     |
| Cancer | C05.8  | ICD10 | Malignant neoplasm of overlapping sites of palate                               |
| Cancer | C05.9  | ICD10 | Malignant neoplasm of palate                                                    |
| Cancer | C06    | ICD10 | Malignant neoplasm of other and unspecified parts of mouth                      |
| Cancer | C06.0  | ICD10 | Malignant neoplasm of cheek mucosa                                              |
| Cancer | C06.1  | ICD10 | Malignant neoplasm of vestibule of mouth                                        |
| Cancer | C06.2  | ICD10 | Malignant neoplasm of retromolar area                                           |
| Cancer | C06.8  | ICD10 | Malignant neoplasm of overlapping sites of other and unspecified parts of mouth |
| Cancer | C06.80 | ICD10 | Malignant neoplasm of overlapping sites of unspecified parts of mouth           |
| Cancer | C06.89 | ICD10 | Malignant neoplasm of overlapping sites of other parts of mouth                 |
| Cancer | C06.9  | ICD10 | Malignant neoplasm of mouth                                                     |
| Cancer | C07    | ICD10 | Malignant neoplasm of parotid gland                                             |

|        |       |       |                                                                   |
|--------|-------|-------|-------------------------------------------------------------------|
| Cancer | C08   | ICD10 | Malignant neoplasm of other and unspecified major salivary glands |
| Cancer | C08.0 | ICD10 | Malignant neoplasm of submandibular gland                         |
| Cancer | C08.1 | ICD10 | Malignant neoplasm of sublingual gland                            |
| Cancer | C08.9 | ICD10 | Malignant neoplasm of major salivary gland                        |
| Cancer | C09   | ICD10 | Malignant neoplasm of tonsil                                      |
| Cancer | C09.0 | ICD10 | Malignant neoplasm of tonsillar fossa                             |
| Cancer | C09.1 | ICD10 | Malignant neoplasm of tonsillar pillar (anterior) (posterior)     |
| Cancer | C09.8 | ICD10 | Malignant neoplasm of overlapping sites of tonsil                 |
| Cancer | C09.9 | ICD10 | Malignant neoplasm of tonsil                                      |
| Cancer | C10   | ICD10 | Malignant neoplasm of oropharynx                                  |
| Cancer | C10.0 | ICD10 | Malignant neoplasm of vallecula                                   |
| Cancer | C10.1 | ICD10 | Malignant neoplasm of anterior surface of epiglottis              |
| Cancer | C10.2 | ICD10 | Malignant neoplasm of lateral wall of oropharynx                  |
| Cancer | C10.3 | ICD10 | Malignant neoplasm of posterior wall of oropharynx                |
| Cancer | C10.4 | ICD10 | Malignant neoplasm of branchial cleft                             |
| Cancer | C10.8 | ICD10 | Malignant neoplasm of overlapping sites of oropharynx             |
| Cancer | C10.9 | ICD10 | Malignant neoplasm of oropharynx                                  |
| Cancer | C11   | ICD10 | Malignant neoplasm of nasopharynx                                 |
| Cancer | C11.0 | ICD10 | Malignant neoplasm of superior wall of nasopharynx                |
| Cancer | C11.1 | ICD10 | Malignant neoplasm of posterior wall of nasopharynx               |
| Cancer | C11.2 | ICD10 | Malignant neoplasm of lateral wall of nasopharynx                 |
| Cancer | C11.3 | ICD10 | Malignant neoplasm of anterior wall of nasopharynx                |
| Cancer | C11.8 | ICD10 | Malignant neoplasm of overlapping sites of nasopharynx            |
| Cancer | C11.9 | ICD10 | Malignant neoplasm of nasopharynx                                 |
| Cancer | C12   | ICD10 | Malignant neoplasm of pyriform sinus                              |
| Cancer | C13   | ICD10 | Malignant neoplasm of hypopharynx                                 |

|        |       |       |                                                              |
|--------|-------|-------|--------------------------------------------------------------|
| Cancer | C13.0 | ICD10 | Malignant neoplasm of postcricoid region                     |
| Cancer | C13.1 | ICD10 | Malignant neoplasm of aryepiglottic fold                     |
| Cancer | C13.2 | ICD10 | Malignant neoplasm of posterior wall of hypopharynx          |
| Cancer | C13.8 | ICD10 | Malignant neoplasm of overlapping sites of hypopharynx       |
| Cancer | C13.9 | ICD10 | Malignant neoplasm of hypopharynx                            |
| Cancer | C14   | ICD10 | Malignant neoplasm of other and ill-defined sites in the lip |
| Cancer | C14.0 | ICD10 | Malignant neoplasm of pharynx                                |
| Cancer | C14.2 | ICD10 | Malignant neoplasm of Waldeyer's ring                        |
| Cancer | C14.8 | ICD10 | Malignant neoplasm of overlapping sites of lip               |
| Cancer | C15   | ICD10 | Malignant neoplasm of esophagus                              |
| Cancer | C15.3 | ICD10 | Malignant neoplasm of upper third of esophagus               |
| Cancer | C15.4 | ICD10 | Malignant neoplasm of middle third of esophagus              |
| Cancer | C15.5 | ICD10 | Malignant neoplasm of lower third of esophagus               |
| Cancer | C15.8 | ICD10 | Malignant neoplasm of overlapping sites of esophagus         |
| Cancer | C15.9 | ICD10 | Malignant neoplasm of esophagus                              |
| Cancer | C16   | ICD10 | Malignant neoplasm of stomach                                |
| Cancer | C16.0 | ICD10 | Malignant neoplasm of cardia                                 |
| Cancer | C16.1 | ICD10 | Malignant neoplasm of fundus of stomach                      |
| Cancer | C16.2 | ICD10 | Malignant neoplasm of body of stomach                        |
| Cancer | C16.3 | ICD10 | Malignant neoplasm of pyloric antrum                         |
| Cancer | C16.4 | ICD10 | Malignant neoplasm of pylorus                                |
| Cancer | C16.5 | ICD10 | Malignant neoplasm of lesser curvature of stomach            |
| Cancer | C16.6 | ICD10 | Malignant neoplasm of greater curvature of stomach           |
| Cancer | C16.8 | ICD10 | Malignant neoplasm of overlapping sites of stomach           |
| Cancer | C16.9 | ICD10 | Malignant neoplasm of stomach                                |
| Cancer | C18   | ICD10 | Malignant neoplasm of colon                                  |
| Cancer | C18.0 | ICD10 | Malignant neoplasm of cecum                                  |

|        |       |       |                                                              |
|--------|-------|-------|--------------------------------------------------------------|
| Cancer | C18.1 | ICD10 | Malignant neoplasm of appendix                               |
| Cancer | C18.2 | ICD10 | Malignant neoplasm of ascending colon                        |
| Cancer | C18.3 | ICD10 | Malignant neoplasm of hepatic flexure                        |
| Cancer | C18.4 | ICD10 | Malignant neoplasm of transverse colon                       |
| Cancer | C18.5 | ICD10 | Malignant neoplasm of splenic flexure                        |
| Cancer | C18.6 | ICD10 | Malignant neoplasm of descending colon                       |
| Cancer | C18.7 | ICD10 | Malignant neoplasm of sigmoid colon                          |
| Cancer | C18.8 | ICD10 | Malignant neoplasm of overlapping sites of colon             |
| Cancer | C18.9 | ICD10 | Malignant neoplasm of colon                                  |
| Cancer | C21.2 | ICD10 | Malignant neoplasm of cloacogenic zone                       |
| Cancer | C21.8 | ICD10 | Malignant neoplasm of overlapping sites of rectum            |
| Cancer | C22   | ICD10 | Malignant neoplasm of liver and intrahepatic bile ducts      |
| Cancer | C22.1 | ICD10 | Intrahepatic bile duct carcinoma                             |
| Cancer | C22.9 | ICD10 | Malignant neoplasm of liver                                  |
| Cancer | C25   | ICD10 | Malignant neoplasm of pancreas                               |
| Cancer | C25.0 | ICD10 | Malignant neoplasm of head of pancreas                       |
| Cancer | C25.1 | ICD10 | Malignant neoplasm of body of pancreas                       |
| Cancer | C25.2 | ICD10 | Malignant neoplasm of tail of pancreas                       |
| Cancer | C25.3 | ICD10 | Malignant neoplasm of pancreatic duct                        |
| Cancer | C25.4 | ICD10 | Malignant neoplasm of endocrine pancreas                     |
| Cancer | C25.7 | ICD10 | Malignant neoplasm of other parts of pancreas                |
| Cancer | C25.8 | ICD10 | Malignant neoplasm of overlapping sites of pancreas          |
| Cancer | C25.9 | ICD10 | Malignant neoplasm of pancreas                               |
| Cancer | C26.0 | ICD10 | Malignant neoplasm of intestinal tract                       |
| Cancer | C30.0 | ICD10 | Malignant neoplasm of nasal cavity                           |
| Cancer | C30.1 | ICD10 | Malignant neoplasm of middle ear                             |
| Cancer | C31   | ICD10 | Malignant neoplasm of accessory sinuses                      |
| Cancer | C31.0 | ICD10 | Malignant neoplasm of maxillary sinus                        |
| Cancer | C31.1 | ICD10 | Malignant neoplasm of ethmoidal sinus                        |
| Cancer | C31.2 | ICD10 | Malignant neoplasm of frontal sinus                          |
| Cancer | C31.3 | ICD10 | Malignant neoplasm of sphenoid sinus                         |
| Cancer | C31.8 | ICD10 | Malignant neoplasm of overlapping sites of accessory sinuses |

|        |        |       |                                                                          |
|--------|--------|-------|--------------------------------------------------------------------------|
| Cancer | C31.9  | ICD10 | Malignant neoplasm of accessory sinus                                    |
| Cancer | C32    | ICD10 | Malignant neoplasm of larynx                                             |
| Cancer | C32.0  | ICD10 | Malignant neoplasm of glottis                                            |
| Cancer | C32.1  | ICD10 | Malignant neoplasm of supraglottis                                       |
| Cancer | C32.2  | ICD10 | Malignant neoplasm of subglottis                                         |
| Cancer | C32.3  | ICD10 | Malignant neoplasm of laryngeal cartilage                                |
| Cancer | C32.8  | ICD10 | Malignant neoplasm of overlapping sites of larynx                        |
| Cancer | C32.9  | ICD10 | Malignant neoplasm of larynx                                             |
| Cancer | C33    | ICD10 | Malignant neoplasm of trachea                                            |
| Cancer | C34    | ICD10 | Malignant neoplasm of bronchus and lung                                  |
| Cancer | C34.0  | ICD10 | Malignant neoplasm of main bronchus                                      |
| Cancer | C34.00 | ICD10 | Malignant neoplasm of unspecified main bronchus                          |
| Cancer | C34.01 | ICD10 | Malignant neoplasm of right main bronchus                                |
| Cancer | C34.02 | ICD10 | Malignant neoplasm of left main bronchus                                 |
| Cancer | C34.1  | ICD10 | Malignant neoplasm of upper lobe                                         |
| Cancer | C34.10 | ICD10 | Malignant neoplasm of upper lobe                                         |
| Cancer | C34.11 | ICD10 | Malignant neoplasm of upper lobe                                         |
| Cancer | C34.12 | ICD10 | Malignant neoplasm of upper lobe                                         |
| Cancer | C34.2  | ICD10 | Malignant neoplasm of middle lobe                                        |
| Cancer | C34.3  | ICD10 | Malignant neoplasm of lower lobe                                         |
| Cancer | C34.30 | ICD10 | Malignant neoplasm of lower lobe                                         |
| Cancer | C34.31 | ICD10 | Malignant neoplasm of lower lobe                                         |
| Cancer | C34.32 | ICD10 | Malignant neoplasm of lower lobe                                         |
| Cancer | C34.8  | ICD10 | Malignant neoplasm of overlapping sites of bronchus and lung             |
| Cancer | C34.80 | ICD10 | Malignant neoplasm of overlapping sites of unspecified bronchus and lung |
| Cancer | C34.81 | ICD10 | Malignant neoplasm of overlapping sites of right bronchus and lung       |
| Cancer | C34.82 | ICD10 | Malignant neoplasm of overlapping sites of left bronchus and lung        |
| Cancer | C34.9  | ICD10 | Malignant neoplasm of unspecified part of bronchus or lung               |

|        |        |       |                                                                                                      |
|--------|--------|-------|------------------------------------------------------------------------------------------------------|
| Cancer | C34.90 | ICD10 | Malignant neoplasm of unspecified part of unspecified bronchus or lung                               |
| Cancer | C34.91 | ICD10 | Malignant neoplasm of unspecified part of right bronchus or lung                                     |
| Cancer | C34.92 | ICD10 | Malignant neoplasm of unspecified part of left bronchus or lung                                      |
| Cancer | C37    | ICD10 | Malignant neoplasm of thymus                                                                         |
| Cancer | C38.0  | ICD10 | Malignant neoplasm of heart                                                                          |
| Cancer | C38.1  | ICD10 | Malignant neoplasm of anterior mediastinum                                                           |
| Cancer | C38.2  | ICD10 | Malignant neoplasm of posterior mediastinum                                                          |
| Cancer | C38.3  | ICD10 | Malignant neoplasm of mediastinum                                                                    |
| Cancer | C38.4  | ICD10 | Malignant neoplasm of pleura                                                                         |
| Cancer | C38.8  | ICD10 | Malignant neoplasm of overlapping sites of heart                                                     |
| Cancer | C39    | ICD10 | Malignant neoplasm of other and ill-defined sites in the respiratory system and intrathoracic organs |
| Cancer | C39.0  | ICD10 | Malignant neoplasm of upper respiratory tract                                                        |
| Cancer | C39.9  | ICD10 | Malignant neoplasm of lower respiratory tract                                                        |
| Cancer | C40    | ICD10 | Malignant neoplasm of bone and articular cartilage of limbs                                          |
| Cancer | C40.0  | ICD10 | Malignant neoplasm of scapula and long bones of upper limb                                           |
| Cancer | C40.00 | ICD10 | Malignant neoplasm of scapula and long bones of unspecified upper limb                               |
| Cancer | C40.01 | ICD10 | Malignant neoplasm of scapula and long bones of right upper limb                                     |
| Cancer | C40.02 | ICD10 | Malignant neoplasm of scapula and long bones of left upper limb                                      |
| Cancer | C40.1  | ICD10 | Malignant neoplasm of short bones of upper limb                                                      |
| Cancer | C40.10 | ICD10 | Malignant neoplasm of short bones of unspecified upper limb                                          |
| Cancer | C40.11 | ICD10 | Malignant neoplasm of short bones of right upper limb                                                |



|        |        |       |                                                                                             |
|--------|--------|-------|---------------------------------------------------------------------------------------------|
| Cancer | C40.12 | ICD10 | Malignant neoplasm of short bones of left upper limb                                        |
| Cancer | C40.2  | ICD10 | Malignant neoplasm of long bones of lower limb                                              |
| Cancer | C40.20 | ICD10 | Malignant neoplasm of long bones of unspecified lower limb                                  |
| Cancer | C40.21 | ICD10 | Malignant neoplasm of long bones of right lower limb                                        |
| Cancer | C40.22 | ICD10 | Malignant neoplasm of long bones of left lower limb                                         |
| Cancer | C40.3  | ICD10 | Malignant neoplasm of short bones of lower limb                                             |
| Cancer | C40.30 | ICD10 | Malignant neoplasm of short bones of unspecified lower limb                                 |
| Cancer | C40.31 | ICD10 | Malignant neoplasm of short bones of right lower limb                                       |
| Cancer | C40.32 | ICD10 | Malignant neoplasm of short bones of left lower limb                                        |
| Cancer | C40.8  | ICD10 | Malignant neoplasm of overlapping sites of bone and articular cartilage of limb             |
| Cancer | C40.80 | ICD10 | Malignant neoplasm of overlapping sites of bone and articular cartilage of unspecified limb |
| Cancer | C40.81 | ICD10 | Malignant neoplasm of overlapping sites of bone and articular cartilage of right limb       |
| Cancer | C40.82 | ICD10 | Malignant neoplasm of overlapping sites of bone and articular cartilage of left limb        |
| Cancer | C40.9  | ICD10 | Malignant neoplasm of unspecified bones and articular cartilage of limb                     |
| Cancer | C40.90 | ICD10 | Malignant neoplasm of unspecified bones and articular cartilage of unspecified limb         |
| Cancer | C40.91 | ICD10 | Malignant neoplasm of unspecified bones and articular cartilage of right limb               |
| Cancer | C40.92 | ICD10 | Malignant neoplasm of unspecified bones and articular cartilage of left limb                |

|        |         |       |                                                                                   |
|--------|---------|-------|-----------------------------------------------------------------------------------|
| Cancer | C41     | ICD10 | Malignant neoplasm of bone and articular cartilage of other and unspecified sites |
| Cancer | C41.0   | ICD10 | Malignant neoplasm of bones of skull and face                                     |
| Cancer | C41.1   | ICD10 | Malignant neoplasm of mandible                                                    |
| Cancer | C41.2   | ICD10 | Malignant neoplasm of vertebral column                                            |
| Cancer | C41.3   | ICD10 | Malignant neoplasm of ribs                                                        |
| Cancer | C41.4   | ICD10 | Malignant neoplasm of pelvic bones                                                |
| Cancer | C41.9   | ICD10 | Malignant neoplasm of bone and articular cartilage                                |
| Cancer | C44.0   | ICD10 | Other and unspecified malignant neoplasm of skin of lip                           |
| Cancer | C44.00  | ICD10 | Unspecified malignant neoplasm of skin of lip                                     |
| Cancer | C44.09  | ICD10 | Other specified malignant neoplasm of skin of lip                                 |
| Cancer | C44.1   | ICD10 | Other and unspecified malignant neoplasm of skin of eyelid                        |
| Cancer | C44.10  | ICD10 | Unspecified malignant neoplasm of skin of eyelid                                  |
| Cancer | C44.101 | ICD10 | Unspecified malignant neoplasm of skin of unspecified eyelid                      |
| Cancer | C44.102 | ICD10 | Unspecified malignant neoplasm of skin of right eyelid                            |
| Cancer | C44.109 | ICD10 | Unspecified malignant neoplasm of skin of left eyelid                             |
| Cancer | C44.11  | ICD10 | Basal cell carcinoma of skin of eyelid                                            |
| Cancer | C44.12  | ICD10 | Squamous cell carcinoma of skin of eyelid                                         |
| Cancer | C44.19  | ICD10 | Other specified malignant neoplasm of skin of eyelid                              |
| Cancer | C44.191 | ICD10 | Other specified malignant neoplasm of skin of unspecified eyelid                  |
| Cancer | C44.192 | ICD10 | Other specified malignant neoplasm of skin of right eyelid                        |
| Cancer | C44.199 | ICD10 | Other specified malignant neoplasm of skin of left eyelid                         |

|        |         |       |                                                                                            |
|--------|---------|-------|--------------------------------------------------------------------------------------------|
| Cancer | C44.2   | ICD10 | Other and unspecified malignant neoplasm of skin of ear and external auricular canal       |
| Cancer | C44.20  | ICD10 | Unspecified malignant neoplasm of skin of ear and external auricular canal                 |
| Cancer | C44.201 | ICD10 | Unspecified malignant neoplasm of skin of unspecified ear and external auricular canal     |
| Cancer | C44.202 | ICD10 | Unspecified malignant neoplasm of skin of right ear and external auricular canal           |
| Cancer | C44.209 | ICD10 | Unspecified malignant neoplasm of skin of left ear and external auricular canal            |
| Cancer | C44.21  | ICD10 | Basal cell carcinoma of skin of ear and external auricular canal                           |
| Cancer | C44.22  | ICD10 | Squamous cell carcinoma of skin of ear and external auricular canal                        |
| Cancer | C44.29  | ICD10 | Other specified malignant neoplasm of skin of ear and external auricular canal             |
| Cancer | C44.291 | ICD10 | Other specified malignant neoplasm of skin of unspecified ear and external auricular canal |
| Cancer | C44.292 | ICD10 | Other specified malignant neoplasm of skin of right ear and external auricular canal       |
| Cancer | C44.299 | ICD10 | Other specified malignant neoplasm of skin of left ear and external auricular canal        |
| Cancer | C44.30  | ICD10 | Unspecified malignant neoplasm of skin of other and unspecified parts of face              |
| Cancer | C44.300 | ICD10 | Unspecified malignant neoplasm of skin of unspecified part of face                         |
| Cancer | C44.301 | ICD10 | Unspecified malignant neoplasm of skin of nose                                             |
| Cancer | C44.309 | ICD10 | Unspecified malignant neoplasm of skin of other parts of face                              |
| Cancer | C44.31  | ICD10 | Basal cell carcinoma of skin of other and unspecified parts of face                        |
| Cancer | C44.39  | ICD10 | Other specified malignant neoplasm of skin of other and unspecified parts of face          |

|        |         |       |                                                                         |
|--------|---------|-------|-------------------------------------------------------------------------|
| Cancer | C44.390 | ICD10 | Other specified malignant neoplasm of skin of unspecified parts of face |
| Cancer | C44.391 | ICD10 | Other specified malignant neoplasm of skin of nose                      |
| Cancer | C44.399 | ICD10 | Other specified malignant neoplasm of skin of other parts of face       |
| Cancer | C44.4   | ICD10 | Other and unspecified malignant neoplasm of skin of scalp and neck      |
| Cancer | C44.40  | ICD10 | Unspecified malignant neoplasm of skin of scalp and neck                |
| Cancer | C44.49  | ICD10 | Other specified malignant neoplasm of skin of scalp and neck            |
| Cancer | C44.500 | ICD10 | Unspecified malignant neoplasm of anal skin                             |
| Cancer | C44.501 | ICD10 | Unspecified malignant neoplasm of skin of breast                        |
| Cancer | C44.509 | ICD10 | Unspecified malignant neoplasm of skin of other part of trunk           |
| Cancer | C44.51  | ICD10 | Basal cell carcinoma of skin of trunk                                   |
| Cancer | C44.52  | ICD10 | Squamous cell carcinoma of skin of trunk                                |
| Cancer | C44.59  | ICD10 | Other specified malignant neoplasm of skin of trunk                     |
| Cancer | C44.590 | ICD10 | Other specified malignant neoplasm of anal skin                         |
| Cancer | C44.591 | ICD10 | Other specified malignant neoplasm of skin of breast                    |
| Cancer | C44.599 | ICD10 | Other specified malignant neoplasm of skin of other part of trunk       |
| Cancer | C44.6   | ICD10 | Other and unspecified malignant neoplasm of skin of upper limb          |
| Cancer | C44.60  | ICD10 | Unspecified malignant neoplasm of skin of upper limb                    |
| Cancer | C44.601 | ICD10 | Unspecified malignant neoplasm of skin of unspecified upper limb        |
| Cancer | C44.602 | ICD10 | Unspecified malignant neoplasm of skin of right upper limb              |
| Cancer | C44.609 | ICD10 | Unspecified malignant neoplasm of skin of left upper limb               |
| Cancer | C44.61  | ICD10 | Basal cell carcinoma of skin of upper limb                              |

|        |         |       |                                                                       |
|--------|---------|-------|-----------------------------------------------------------------------|
| Cancer | C44.62  | ICD10 | Squamous cell carcinoma of skin of upper limb                         |
| Cancer | C44.69  | ICD10 | Other specified malignant neoplasm of skin of upper limb              |
| Cancer | C44.691 | ICD10 | Other specified malignant neoplasm of skin of unspecified upper limb  |
| Cancer | C44.692 | ICD10 | Other specified malignant neoplasm of skin of right upper limb        |
| Cancer | C44.699 | ICD10 | Other specified malignant neoplasm of skin of left upper limb         |
| Cancer | C44.7   | ICD10 | Other and unspecified malignant neoplasm of skin of lower limb        |
| Cancer | C44.70  | ICD10 | Unspecified malignant neoplasm of skin of lower limb                  |
| Cancer | C44.701 | ICD10 | Unspecified malignant neoplasm of skin of unspecified lower limb      |
| Cancer | C44.702 | ICD10 | Unspecified malignant neoplasm of skin of right lower limb            |
| Cancer | C44.709 | ICD10 | Unspecified malignant neoplasm of skin of left lower limb             |
| Cancer | C44.71  | ICD10 | Basal cell carcinoma of skin of lower limb                            |
| Cancer | C44.72  | ICD10 | Squamous cell carcinoma of skin of lower limb                         |
| Cancer | C44.79  | ICD10 | Other specified malignant neoplasm of skin of lower limb              |
| Cancer | C44.791 | ICD10 | Other specified malignant neoplasm of skin of unspecified lower limb  |
| Cancer | C44.792 | ICD10 | Other specified malignant neoplasm of skin of right lower limb        |
| Cancer | C44.799 | ICD10 | Other specified malignant neoplasm of skin of left lower limb         |
| Cancer | C44.8   | ICD10 | Other and unspecified malignant neoplasm of overlapping sites of skin |
| Cancer | C44.80  | ICD10 | Unspecified malignant neoplasm of overlapping sites of skin           |
| Cancer | C44.89  | ICD10 | Other specified malignant neoplasm of overlapping sites of skin       |
| Cancer | C44.9   | ICD10 | Other and unspecified malignant neoplasm of skin                      |

|        |        |       |                                                                                           |
|--------|--------|-------|-------------------------------------------------------------------------------------------|
| Cancer | C44.90 | ICD10 | Unspecified malignant neoplasm of skin                                                    |
| Cancer | C44.99 | ICD10 | Other specified malignant neoplasm of skin                                                |
| Cancer | C45.0  | ICD10 | Mesothelioma of pleura                                                                    |
| Cancer | C45.2  | ICD10 | Mesothelioma of pericardium                                                               |
| Cancer | C47    | ICD10 | Malignant neoplasm of peripheral nerves and autonomic nervous system                      |
| Cancer | C47.0  | ICD10 | Malignant neoplasm of peripheral nerves of head                                           |
| Cancer | C47.1  | ICD10 | Malignant neoplasm of peripheral nerves of upper limb                                     |
| Cancer | C47.10 | ICD10 | Malignant neoplasm of peripheral nerves of unspecified upper limb                         |
| Cancer | C47.11 | ICD10 | Malignant neoplasm of peripheral nerves of right upper limb                               |
| Cancer | C47.12 | ICD10 | Malignant neoplasm of peripheral nerves of left upper limb                                |
| Cancer | C47.2  | ICD10 | Malignant neoplasm of peripheral nerves of lower limb                                     |
| Cancer | C47.20 | ICD10 | Malignant neoplasm of peripheral nerves of unspecified lower limb                         |
| Cancer | C47.21 | ICD10 | Malignant neoplasm of peripheral nerves of right lower limb                               |
| Cancer | C47.22 | ICD10 | Malignant neoplasm of peripheral nerves of left lower limb                                |
| Cancer | C47.3  | ICD10 | Malignant neoplasm of peripheral nerves of thorax                                         |
| Cancer | C47.4  | ICD10 | Malignant neoplasm of peripheral nerves of abdomen                                        |
| Cancer | C47.5  | ICD10 | Malignant neoplasm of peripheral nerves of pelvis                                         |
| Cancer | C47.6  | ICD10 | Malignant neoplasm of peripheral nerves of trunk                                          |
| Cancer | C47.8  | ICD10 | Malignant neoplasm of overlapping sites of peripheral nerves and autonomic nervous system |
| Cancer | C47.9  | ICD10 | Malignant neoplasm of peripheral nerves and autonomic nervous system                      |
| Cancer | C49.0  | ICD10 | Malignant neoplasm of other connective and soft tissue                                    |

|        |        |       |                                                                            |
|--------|--------|-------|----------------------------------------------------------------------------|
| Cancer | C49.0  | ICD10 | Malignant neoplasm of connective and soft tissue of head                   |
| Cancer | C49.1  | ICD10 | Malignant neoplasm of connective and soft tissue of upper limb             |
| Cancer | C49.10 | ICD10 | Malignant neoplasm of connective and soft tissue of unspecified upper limb |
| Cancer | C49.11 | ICD10 | Malignant neoplasm of connective and soft tissue of right upper limb       |
| Cancer | C49.12 | ICD10 | Malignant neoplasm of connective and soft tissue of left upper limb        |
| Cancer | C49.2  | ICD10 | Malignant neoplasm of connective and soft tissue of lower limb             |
| Cancer | C49.20 | ICD10 | Malignant neoplasm of connective and soft tissue of unspecified lower limb |
| Cancer | C49.21 | ICD10 | Malignant neoplasm of connective and soft tissue of right lower limb       |
| Cancer | C49.22 | ICD10 | Malignant neoplasm of connective and soft tissue of left lower limb        |
| Cancer | C49.3  | ICD10 | Malignant neoplasm of connective and soft tissue of thorax                 |
| Cancer | C49.4  | ICD10 | Malignant neoplasm of connective and soft tissue of abdomen                |
| Cancer | C49.5  | ICD10 | Malignant neoplasm of connective and soft tissue of pelvis                 |
| Cancer | C49.6  | ICD10 | Malignant neoplasm of connective and soft tissue of trunk                  |
| Cancer | C49.8  | ICD10 | Malignant neoplasm of overlapping sites of connective and soft tissue      |
| Cancer | C49.9  | ICD10 | Malignant neoplasm of connective and soft tissue                           |
| Cancer | C49.A  | ICD10 | Gastrointestinal stromal tumor                                             |
| Cancer | C49.A0 | ICD10 | Gastrointestinal stromal tumor                                             |
| Cancer | C49.A1 | ICD10 | Gastrointestinal stromal tumor of esophagus                                |
| Cancer | C49.A2 | ICD10 | Gastrointestinal stromal tumor of stomach                                  |
| Cancer | C49.A3 | ICD10 | Gastrointestinal stromal tumor of small intestine                          |
| Cancer | C49.A4 | ICD10 | Gastrointestinal stromal tumor of large intestine                          |

|        |        |       |                                                                       |
|--------|--------|-------|-----------------------------------------------------------------------|
| Cancer | C49.A5 | ICD10 | Gastrointestinal stromal tumor of rectum                              |
| Cancer | C49.A9 | ICD10 | Gastrointestinal stromal tumor of other sites                         |
| Cancer | C4A    | ICD10 | Merkel cell carcinoma                                                 |
| Cancer | C4A.0  | ICD10 | Merkel cell carcinoma of lip                                          |
| Cancer | C4A.1  | ICD10 | Merkel cell carcinoma of eyelid                                       |
| Cancer | C4A.10 | ICD10 | Merkel cell carcinoma of unspecified eyelid                           |
| Cancer | C4A.11 | ICD10 | Merkel cell carcinoma of right eyelid                                 |
| Cancer | C4A.12 | ICD10 | Merkel cell carcinoma of left eyelid                                  |
| Cancer | C4A.2  | ICD10 | Merkel cell carcinoma of ear and external auricular canal             |
| Cancer | C4A.20 | ICD10 | Merkel cell carcinoma of unspecified ear and external auricular canal |
| Cancer | C4A.21 | ICD10 | Merkel cell carcinoma of right ear and external auricular canal       |
| Cancer | C4A.22 | ICD10 | Merkel cell carcinoma of left ear and external auricular canal        |
| Cancer | C4A.3  | ICD10 | Merkel cell carcinoma of other and unspecified parts of face          |
| Cancer | C4A.30 | ICD10 | Merkel cell carcinoma of unspecified part of face                     |
| Cancer | C4A.31 | ICD10 | Merkel cell carcinoma of nose                                         |
| Cancer | C4A.39 | ICD10 | Merkel cell carcinoma of other parts of face                          |
| Cancer | C4A.4  | ICD10 | Merkel cell carcinoma of scalp and neck                               |
| Cancer | C4A.5  | ICD10 | Merkel cell carcinoma of trunk                                        |
| Cancer | C4A.51 | ICD10 | Merkel cell carcinoma of anal skin                                    |
| Cancer | C4A.52 | ICD10 | Merkel cell carcinoma of skin of breast                               |
| Cancer | C4A.59 | ICD10 | Merkel cell carcinoma of other part of trunk                          |
| Cancer | C4A.6  | ICD10 | Merkel cell carcinoma of upper limb                                   |
| Cancer | C4A.60 | ICD10 | Merkel cell carcinoma of unspecified upper limb                       |
| Cancer | C4A.61 | ICD10 | Merkel cell carcinoma of right upper limb                             |
| Cancer | C4A.62 | ICD10 | Merkel cell carcinoma of left upper limb                              |
| Cancer | C4A.7  | ICD10 | Merkel cell carcinoma of lower limb                                   |



|        |         |       |                                                                       |
|--------|---------|-------|-----------------------------------------------------------------------|
| Cancer | C4A.70  | ICD10 | Merkel cell carcinoma of unspecified lower limb                       |
| Cancer | C4A.71  | ICD10 | Merkel cell carcinoma of right lower limb                             |
| Cancer | C4A.72  | ICD10 | Merkel cell carcinoma of left lower limb                              |
| Cancer | C4A.8   | ICD10 | Merkel cell carcinoma of overlapping sites                            |
| Cancer | C4A.9   | ICD10 | Merkel cell carcinoma                                                 |
| Cancer | C50.02  | ICD10 | Malignant neoplasm of nipple and areola                               |
| Cancer | C50.021 | ICD10 | Malignant neoplasm of nipple and areola                               |
| Cancer | C50.022 | ICD10 | Malignant neoplasm of nipple and areola                               |
| Cancer | C50.029 | ICD10 | Malignant neoplasm of nipple and areola                               |
| Cancer | C50.12  | ICD10 | Malignant neoplasm of central portion of breast                       |
| Cancer | C50.121 | ICD10 | Malignant neoplasm of central portion of right male breast            |
| Cancer | C50.122 | ICD10 | Malignant neoplasm of central portion of left male breast             |
| Cancer | C50.129 | ICD10 | Malignant neoplasm of central portion of unspecified male breast      |
| Cancer | C50.22  | ICD10 | Malignant neoplasm of upper-inner quadrant of breast                  |
| Cancer | C50.221 | ICD10 | Malignant neoplasm of upper-inner quadrant of right male breast       |
| Cancer | C50.222 | ICD10 | Malignant neoplasm of upper-inner quadrant of left male breast        |
| Cancer | C50.229 | ICD10 | Malignant neoplasm of upper-inner quadrant of unspecified male breast |
| Cancer | C50.32  | ICD10 | Malignant neoplasm of lower-inner quadrant of breast                  |
| Cancer | C50.321 | ICD10 | Malignant neoplasm of lower-inner quadrant of right male breast       |
| Cancer | C50.322 | ICD10 | Malignant neoplasm of lower-inner quadrant of left male breast        |
| Cancer | C50.329 | ICD10 | Malignant neoplasm of lower-inner quadrant of unspecified male breast |
| Cancer | C50.42  | ICD10 | Malignant neoplasm of upper-outer quadrant of breast                  |
| Cancer | C50.421 | ICD10 | Malignant neoplasm of upper-outer quadrant of right male breast       |

|        |         |       |                                                                       |
|--------|---------|-------|-----------------------------------------------------------------------|
| Cancer | C50.422 | ICD10 | Malignant neoplasm of upper-outer quadrant of left male breast        |
| Cancer | C50.429 | ICD10 | Malignant neoplasm of upper-outer quadrant of unspecified male breast |
| Cancer | C50.52  | ICD10 | Malignant neoplasm of lower-outer quadrant of breast                  |
| Cancer | C50.521 | ICD10 | Malignant neoplasm of lower-outer quadrant of right male breast       |
| Cancer | C50.522 | ICD10 | Malignant neoplasm of lower-outer quadrant of left male breast        |
| Cancer | C50.529 | ICD10 | Malignant neoplasm of lower-outer quadrant of unspecified male breast |
| Cancer | C50.62  | ICD10 | Malignant neoplasm of axillary tail of breast                         |
| Cancer | C50.621 | ICD10 | Malignant neoplasm of axillary tail of right male breast              |
| Cancer | C50.622 | ICD10 | Malignant neoplasm of axillary tail of left male breast               |
| Cancer | C50.629 | ICD10 | Malignant neoplasm of axillary tail of unspecified male breast        |
| Cancer | C50.82  | ICD10 | Malignant neoplasm of overlapping sites of breast                     |
| Cancer | C50.821 | ICD10 | Malignant neoplasm of overlapping sites of right male breast          |
| Cancer | C50.822 | ICD10 | Malignant neoplasm of overlapping sites of left male breast           |
| Cancer | C50.829 | ICD10 | Malignant neoplasm of overlapping sites of unspecified male breast    |
| Cancer | C50.92  | ICD10 | Malignant neoplasm of breast of unspecified site                      |
| Cancer | C50.921 | ICD10 | Malignant neoplasm of unspecified site of right male breast           |
| Cancer | C50.922 | ICD10 | Malignant neoplasm of unspecified site of left male breast            |
| Cancer | C50.929 | ICD10 | Malignant neoplasm of unspecified site of unspecified male breast     |
| Cancer | C51     | ICD10 | Malignant neoplasm of vulva                                           |
| Cancer | C51.0   | ICD10 | Malignant neoplasm of labium majus                                    |
| Cancer | C51.1   | ICD10 | Malignant neoplasm of labium minus                                    |
| Cancer | C51.2   | ICD10 | Malignant neoplasm of clitoris                                        |

|        |        |       |                                                           |
|--------|--------|-------|-----------------------------------------------------------|
| Cancer | C51.9  | ICD10 | Malignant neoplasm of vulva                               |
| Cancer | C52    | ICD10 | Malignant neoplasm of vagina                              |
| Cancer | C53    | ICD10 | Malignant neoplasm of cervix uteri                        |
| Cancer | C53.0  | ICD10 | Malignant neoplasm of endocervix                          |
| Cancer | C53.1  | ICD10 | Malignant neoplasm of exocervix                           |
| Cancer | C53.8  | ICD10 | Malignant neoplasm of overlapping sites of cervix uteri   |
| Cancer | C53.9  | ICD10 | Malignant neoplasm of cervix uteri                        |
| Cancer | C61    | ICD10 | Malignant neoplasm of prostate                            |
| Cancer | C69    | ICD10 | Malignant neoplasm of eye and adnexa                      |
| Cancer | C69.0  | ICD10 | Malignant neoplasm of conjunctiva                         |
| Cancer | C69.00 | ICD10 | Malignant neoplasm of unspecified conjunctiva             |
| Cancer | C69.01 | ICD10 | Malignant neoplasm of right conjunctiva                   |
| Cancer | C69.02 | ICD10 | Malignant neoplasm of left conjunctiva                    |
| Cancer | C69.1  | ICD10 | Malignant neoplasm of cornea                              |
| Cancer | C69.10 | ICD10 | Malignant neoplasm of unspecified cornea                  |
| Cancer | C69.11 | ICD10 | Malignant neoplasm of right cornea                        |
| Cancer | C69.12 | ICD10 | Malignant neoplasm of left cornea                         |
| Cancer | C69.2  | ICD10 | Malignant neoplasm of retina                              |
| Cancer | C69.20 | ICD10 | Malignant neoplasm of unspecified retina                  |
| Cancer | C69.21 | ICD10 | Malignant neoplasm of right retina                        |
| Cancer | C69.22 | ICD10 | Malignant neoplasm of left retina                         |
| Cancer | C69.3  | ICD10 | Malignant neoplasm of choroid                             |
| Cancer | C69.30 | ICD10 | Malignant neoplasm of unspecified choroid                 |
| Cancer | C69.31 | ICD10 | Malignant neoplasm of right choroid                       |
| Cancer | C69.32 | ICD10 | Malignant neoplasm of left choroid                        |
| Cancer | C69.4  | ICD10 | Malignant neoplasm of ciliary body                        |
| Cancer | C69.40 | ICD10 | Malignant neoplasm of unspecified ciliary body            |
| Cancer | C69.41 | ICD10 | Malignant neoplasm of right ciliary body                  |
| Cancer | C69.42 | ICD10 | Malignant neoplasm of left ciliary body                   |
| Cancer | C69.5  | ICD10 | Malignant neoplasm of lacrimal gland and duct             |
| Cancer | C69.50 | ICD10 | Malignant neoplasm of unspecified lacrimal gland and duct |

|        |        |       |                                                                       |
|--------|--------|-------|-----------------------------------------------------------------------|
| Cancer | C69.51 | ICD10 | Malignant neoplasm of right lacrimal gland and duct                   |
| Cancer | C69.52 | ICD10 | Malignant neoplasm of left lacrimal gland and duct                    |
| Cancer | C69.6  | ICD10 | Malignant neoplasm of orbit                                           |
| Cancer | C69.60 | ICD10 | Malignant neoplasm of unspecified orbit                               |
| Cancer | C69.61 | ICD10 | Malignant neoplasm of right orbit                                     |
| Cancer | C69.62 | ICD10 | Malignant neoplasm of left orbit                                      |
| Cancer | C69.8  | ICD10 | Malignant neoplasm of overlapping sites of eye and adnexa             |
| Cancer | C69.80 | ICD10 | Malignant neoplasm of overlapping sites of unspecified eye and adnexa |
| Cancer | C69.81 | ICD10 | Malignant neoplasm of overlapping sites of right eye and adnexa       |
| Cancer | C69.82 | ICD10 | Malignant neoplasm of overlapping sites of left eye and adnexa        |
| Cancer | C69.9  | ICD10 | Malignant neoplasm of unspecified site of eye                         |
| Cancer | C69.90 | ICD10 | Malignant neoplasm of unspecified site of unspecified eye             |
| Cancer | C69.91 | ICD10 | Malignant neoplasm of unspecified site of right eye                   |
| Cancer | C69.92 | ICD10 | Malignant neoplasm of unspecified site of left eye                    |
| Cancer | C70    | ICD10 | Malignant neoplasm of meninges                                        |
| Cancer | C70.0  | ICD10 | Malignant neoplasm of cerebral meninges                               |
| Cancer | C70.1  | ICD10 | Malignant neoplasm of spinal meninges                                 |
| Cancer | C70.9  | ICD10 | Malignant neoplasm of meninges                                        |
| Cancer | C71    | ICD10 | Malignant neoplasm of brain                                           |
| Cancer | C71.0  | ICD10 | Malignant neoplasm of cerebrum                                        |
| Cancer | C71.1  | ICD10 | Malignant neoplasm of frontal lobe                                    |
| Cancer | C71.2  | ICD10 | Malignant neoplasm of temporal lobe                                   |
| Cancer | C71.3  | ICD10 | Malignant neoplasm of parietal lobe                                   |
| Cancer | C71.4  | ICD10 | Malignant neoplasm of occipital lobe                                  |
| Cancer | C71.5  | ICD10 | Malignant neoplasm of cerebral ventricle                              |
| Cancer | C71.6  | ICD10 | Malignant neoplasm of cerebellum                                      |
| Cancer | C71.7  | ICD10 | Malignant neoplasm of brain stem                                      |
| Cancer | C71.8  | ICD10 | Malignant neoplasm of overlapping sites of brain                      |

|        |        |       |                                                            |
|--------|--------|-------|------------------------------------------------------------|
| Cancer | C71.9  | ICD10 | Malignant neoplasm of brain                                |
| Cancer | C72    | ICD10 | Malignant neoplasm of spinal cord                          |
| Cancer | C72.0  | ICD10 | Malignant neoplasm of spinal cord                          |
| Cancer | C72.1  | ICD10 | Malignant neoplasm of cauda equina                         |
| Cancer | C72.2  | ICD10 | Malignant neoplasm of olfactory nerve                      |
| Cancer | C72.20 | ICD10 | Malignant neoplasm of unspecified olfactory nerve          |
| Cancer | C72.21 | ICD10 | Malignant neoplasm of right olfactory nerve                |
| Cancer | C72.22 | ICD10 | Malignant neoplasm of left olfactory nerve                 |
| Cancer | C72.3  | ICD10 | Malignant neoplasm of optic nerve                          |
| Cancer | C72.30 | ICD10 | Malignant neoplasm of unspecified optic nerve              |
| Cancer | C72.31 | ICD10 | Malignant neoplasm of right optic nerve                    |
| Cancer | C72.32 | ICD10 | Malignant neoplasm of left optic nerve                     |
| Cancer | C72.4  | ICD10 | Malignant neoplasm of acoustic nerve                       |
| Cancer | C72.40 | ICD10 | Malignant neoplasm of unspecified acoustic nerve           |
| Cancer | C72.41 | ICD10 | Malignant neoplasm of right acoustic nerve                 |
| Cancer | C72.42 | ICD10 | Malignant neoplasm of left acoustic nerve                  |
| Cancer | C72.5  | ICD10 | Malignant neoplasm of other and unspecified cranial nerves |
| Cancer | C72.50 | ICD10 | Malignant neoplasm of unspecified cranial nerve            |
| Cancer | C72.59 | ICD10 | Malignant neoplasm of other cranial nerves                 |
| Cancer | C72.9  | ICD10 | Malignant neoplasm of central nervous system               |
| Cancer | C73    | ICD10 | Malignant neoplasm of thyroid gland                        |
| Cancer | C74    | ICD10 | Malignant neoplasm of adrenal gland                        |
| Cancer | C74.0  | ICD10 | Malignant neoplasm of cortex of adrenal gland              |
| Cancer | C74.00 | ICD10 | Malignant neoplasm of cortex of unspecified adrenal gland  |
| Cancer | C74.01 | ICD10 | Malignant neoplasm of cortex of right adrenal gland        |

|        |         |       |                                                                     |
|--------|---------|-------|---------------------------------------------------------------------|
| Cancer | C74.02  | ICD10 | Malignant neoplasm of cortex of left adrenal gland                  |
| Cancer | C74.1   | ICD10 | Malignant neoplasm of medulla of adrenal gland                      |
| Cancer | C74.10  | ICD10 | Malignant neoplasm of medulla of unspecified adrenal gland          |
| Cancer | C74.11  | ICD10 | Malignant neoplasm of medulla of right adrenal gland                |
| Cancer | C74.12  | ICD10 | Malignant neoplasm of medulla of left adrenal gland                 |
| Cancer | C74.9   | ICD10 | Malignant neoplasm of unspecified part of adrenal gland             |
| Cancer | C74.90  | ICD10 | Malignant neoplasm of unspecified part of unspecified adrenal gland |
| Cancer | C74.91  | ICD10 | Malignant neoplasm of unspecified part of right adrenal gland       |
| Cancer | C74.92  | ICD10 | Malignant neoplasm of unspecified part of left adrenal gland        |
| Cancer | C75     | ICD10 | Malignant neoplasm of other endocrine glands and related structures |
| Cancer | C75.0   | ICD10 | Malignant neoplasm of parathyroid gland                             |
| Cancer | C75.1   | ICD10 | Malignant neoplasm of pituitary gland                               |
| Cancer | C75.2   | ICD10 | Malignant neoplasm of craniopharyngeal duct                         |
| Cancer | C75.3   | ICD10 | Malignant neoplasm of pineal gland                                  |
| Cancer | C75.4   | ICD10 | Malignant neoplasm of carotid body                                  |
| Cancer | C75.5   | ICD10 | Malignant neoplasm of aortic body and other paraganglia             |
| Cancer | C75.8   | ICD10 | Malignant neoplasm with pluriglandular involvement                  |
| Cancer | C75.9   | ICD10 | Malignant neoplasm of endocrine gland                               |
| Cancer | C76.1   | ICD10 | Malignant neoplasm of thorax                                        |
| Cancer | C7A.0   | ICD10 | Malignant carcinoid tumors                                          |
| Cancer | C7A.0   | ICD10 | Malignant carcinoid tumors                                          |
| Cancer | C7A.0   | ICD10 | Malignant carcinoid tumors                                          |
| Cancer | C7A.00  | ICD10 | Malignant carcinoid tumor of unspecified site                       |
| Cancer | C7A.020 | ICD10 | Malignant carcinoid tumor of the appendix                           |

|        |         |       |                                                                           |
|--------|---------|-------|---------------------------------------------------------------------------|
| Cancer | C7A.021 | ICD10 | Malignant carcinoid tumor of the cecum                                    |
| Cancer | C7A.022 | ICD10 | Malignant carcinoid tumor of the ascending colon                          |
| Cancer | C7A.023 | ICD10 | Malignant carcinoid tumor of the transverse colon                         |
| Cancer | C7A.024 | ICD10 | Malignant carcinoid tumor of the descending colon                         |
| Cancer | C7A.025 | ICD10 | Malignant carcinoid tumor of the sigmoid colon                            |
| Cancer | C7A.029 | ICD10 | Malignant carcinoid tumor of the large intestine                          |
| Cancer | C7A.090 | ICD10 | Malignant carcinoid tumor of the bronchus and lung                        |
| Cancer | C7A.091 | ICD10 | Malignant carcinoid tumor of the thymus                                   |
| Cancer | C7A.092 | ICD10 | Malignant carcinoid tumor of the stomach                                  |
| Cancer | C7A.093 | ICD10 | Malignant carcinoid tumor of the kidney                                   |
| Cancer | C7A.098 | ICD10 | Malignant carcinoid tumors of other sites                                 |
| Cancer | C7A.1   | ICD10 | Malignant poorly differentiated neuroendocrine tumors                     |
| Cancer | C7A.8   | ICD10 | Other malignant neuroendocrine tumors                                     |
| Cancer | C7B.00  | ICD10 | Secondary carcinoid tumors                                                |
| Cancer | C7B.1   | ICD10 | Secondary Merkel cell carcinoma                                           |
| Cancer | C96.0   | ICD10 | Multifocal and multisystemic (disseminated) Langerhans-cell histiocytosis |
| Cancer | C96.2   | ICD10 | Malignant mast cell neoplasm                                              |
| Cancer | C96.22  | ICD10 | Mast cell sarcoma                                                         |
| Cancer | C96.A   | ICD10 | Histiocytic sarcoma                                                       |
| Cancer | D00.0   | ICD10 | Carcinoma in situ of lip                                                  |
| Cancer | D00.00  | ICD10 | Carcinoma in situ of oral cavity                                          |
| Cancer | D00.01  | ICD10 | Carcinoma in situ of labial mucosa and vermilion border                   |
| Cancer | D00.02  | ICD10 | Carcinoma in situ of buccal mucosa                                        |
| Cancer | D00.03  | ICD10 | Carcinoma in situ of gingiva and edentulous alveolar ridge                |
| Cancer | D00.04  | ICD10 | Carcinoma in situ of soft palate                                          |
| Cancer | D00.05  | ICD10 | Carcinoma in situ of hard palate                                          |
| Cancer | D00.06  | ICD10 | Carcinoma in situ of floor of mouth                                       |

|        |        |       |                                                                 |
|--------|--------|-------|-----------------------------------------------------------------|
| Cancer | D00.07 | ICD10 | Carcinoma in situ of tongue                                     |
| Cancer | D00.08 | ICD10 | Carcinoma in situ of pharynx                                    |
| Cancer | D00.1  | ICD10 | Carcinoma in situ of esophagus                                  |
| Cancer | D00.2  | ICD10 | Carcinoma in situ of stomach                                    |
| Cancer | D01.0  | ICD10 | Carcinoma in situ of colon                                      |
| Cancer | D01.5  | ICD10 | Carcinoma in situ of liver                                      |
| Cancer | D02.0  | ICD10 | Carcinoma in situ of larynx                                     |
| Cancer | D02.1  | ICD10 | Carcinoma in situ of trachea                                    |
| Cancer | D02.2  | ICD10 | Carcinoma in situ of bronchus and lung                          |
| Cancer | D02.20 | ICD10 | Carcinoma in situ of unspecified bronchus and lung              |
| Cancer | D02.21 | ICD10 | Carcinoma in situ of right bronchus and lung                    |
| Cancer | D02.22 | ICD10 | Carcinoma in situ of left bronchus and lung                     |
| Cancer | D02.3  | ICD10 | Carcinoma in situ of other parts of respiratory system          |
| Cancer | D02.4  | ICD10 | Carcinoma in situ of respiratory system                         |
| Cancer | D05    | ICD10 | Carcinoma in situ of breast                                     |
| Cancer | D05.0  | ICD10 | Lobular carcinoma in situ of breast                             |
| Cancer | D05.00 | ICD10 | Lobular carcinoma in situ of unspecified breast                 |
| Cancer | D05.01 | ICD10 | Lobular carcinoma in situ of right breast                       |
| Cancer | D05.02 | ICD10 | Lobular carcinoma in situ of left breast                        |
| Cancer | D05.1  | ICD10 | Intraductal carcinoma in situ of breast                         |
| Cancer | D05.10 | ICD10 | Intraductal carcinoma in situ of unspecified breast             |
| Cancer | D05.11 | ICD10 | Intraductal carcinoma in situ of right breast                   |
| Cancer | D05.12 | ICD10 | Intraductal carcinoma in situ of left breast                    |
| Cancer | D05.8  | ICD10 | Other specified type of carcinoma in situ of breast             |
| Cancer | D05.80 | ICD10 | Other specified type of carcinoma in situ of unspecified breast |
| Cancer | D05.81 | ICD10 | Other specified type of carcinoma in situ of right breast       |
| Cancer | D05.82 | ICD10 | Other specified type of carcinoma in situ of left breast        |



|        |        |       |                                                                  |
|--------|--------|-------|------------------------------------------------------------------|
| Cancer | D05.9  | ICD10 | Unspecified type of carcinoma in situ of breast                  |
| Cancer | D05.90 | ICD10 | Unspecified type of carcinoma in situ of unspecified breast      |
| Cancer | D05.91 | ICD10 | Unspecified type of carcinoma in situ of right breast            |
| Cancer | D05.92 | ICD10 | Unspecified type of carcinoma in situ of left breast             |
| Cancer | D07.1  | ICD10 | Carcinoma in situ of vulva                                       |
| Cancer | D07.2  | ICD10 | Carcinoma in situ of vagina                                      |
| Cancer | D07.3  | ICD10 | Carcinoma in situ of other and unspecified female genital organs |
| Cancer | D07.30 | ICD10 | Carcinoma in situ of unspecified female genital organs           |
| Cancer | D07.39 | ICD10 | Carcinoma in situ of other female genital organs                 |
| Cancer | D07.4  | ICD10 | Carcinoma in situ of penis                                       |
| Cancer | D07.5  | ICD10 | Carcinoma in situ of prostate                                    |
| Cancer | D07.6  | ICD10 | Carcinoma in situ of other and unspecified male genital organs   |
| Cancer | D07.60 | ICD10 | Carcinoma in situ of unspecified male genital organs             |
| Cancer | D07.61 | ICD10 | Carcinoma in situ of scrotum                                     |
| Cancer | D07.69 | ICD10 | Carcinoma in situ of other male genital organs                   |
| Cancer | D09    | ICD10 | Carcinoma in situ of other and unspecified sites                 |
| Cancer | D09.0  | ICD10 | Carcinoma in situ of bladder                                     |
| Cancer | D09.1  | ICD10 | Carcinoma in situ of other and unspecified urinary organs        |
| Cancer | D09.10 | ICD10 | Carcinoma in situ of unspecified urinary organ                   |
| Cancer | D09.19 | ICD10 | Carcinoma in situ of other urinary organs                        |
| Cancer | D09.2  | ICD10 | Carcinoma in situ of eye                                         |
| Cancer | D09.20 | ICD10 | Carcinoma in situ of unspecified eye                             |
| Cancer | D09.21 | ICD10 | Carcinoma in situ of right eye                                   |
| Cancer | D09.22 | ICD10 | Carcinoma in situ of left eye                                    |
| Cancer | D09.3  | ICD10 | Carcinoma in situ of thyroid and other endocrine glands          |
| Cancer | D09.8  | ICD10 | Carcinoma in situ of other specified sites                       |

|        |         |       |                                                                         |
|--------|---------|-------|-------------------------------------------------------------------------|
| Cancer | D09.9   | ICD10 | Carcinoma in situ                                                       |
| Cancer | D39     | ICD10 | Neoplasm of uncertain behavior of female genital organs                 |
| Cancer | D39.0   | ICD10 | Neoplasm of uncertain behavior of uterus                                |
| Cancer | D39.1   | ICD10 | Neoplasm of uncertain behavior of ovary                                 |
| Cancer | D39.10  | ICD10 | Neoplasm of uncertain behavior of unspecified ovary                     |
| Cancer | D39.11  | ICD10 | Neoplasm of uncertain behavior of right ovary                           |
| Cancer | D39.12  | ICD10 | Neoplasm of uncertain behavior of left ovary                            |
| Cancer | D39.2   | ICD10 | Neoplasm of uncertain behavior of placenta                              |
| Cancer | D39.8   | ICD10 | Neoplasm of uncertain behavior of other specified female genital organs |
| Cancer | D39.9   | ICD10 | Neoplasm of uncertain behavior of female genital organ                  |
| Cancer | D41.4   | ICD10 | Neoplasm of uncertain behavior of bladder                               |
| Cancer | D49.4   | ICD10 | Neoplasm of unspecified behavior of bladder                             |
| Cancer | G89.3   | ICD10 | Neoplasm related pain (acute) (chronic)                                 |
| Cancer | M90.6   | ICD10 | Osteitis deformans in neoplastic diseases                               |
| Cancer | N90.3   | ICD10 | Dysplasia of vulva                                                      |
| Cancer | R97.1   | ICD10 | Elevated cancer antigen 125 [CA 125]                                    |
| Cancer | Z85.01  | ICD10 | Personal history of malignant neoplasm of esophagus                     |
| Cancer | Z85.02  | ICD10 | Personal history of malignant neoplasm of stomach                       |
| Cancer | Z85.020 | ICD10 | Personal history of malignant carcinoid tumor of stomach                |
| Cancer | Z85.028 | ICD10 | Personal history of other malignant neoplasm of stomach                 |
| Cancer | Z85.03  | ICD10 | Personal history of malignant neoplasm of large intestine               |
| Cancer | Z85.030 | ICD10 | Personal history of malignant carcinoid tumor of large intestine        |

|        |         |       |                                                                                      |
|--------|---------|-------|--------------------------------------------------------------------------------------|
| Cancer | Z85.038 | ICD10 | Personal history of other malignant neoplasm of large intestine                      |
| Cancer | Z85.07  | ICD10 | Personal history of malignant neoplasm of pancreas                                   |
| Cancer | Z85.1   | ICD10 | Personal history of malignant neoplasm of trachea                                    |
| Cancer | Z85.11  | ICD10 | Personal history of malignant neoplasm of bronchus and lung                          |
| Cancer | Z85.110 | ICD10 | Personal history of malignant carcinoid tumor of bronchus and lung                   |
| Cancer | Z85.118 | ICD10 | Personal history of other malignant neoplasm of bronchus and lung                    |
| Cancer | Z85.12  | ICD10 | Personal history of malignant neoplasm of trachea                                    |
| Cancer | Z85.2   | ICD10 | Personal history of malignant neoplasm of other respiratory and intrathoracic organs |
| Cancer | Z85.20  | ICD10 | Personal history of malignant neoplasm of unspecified respiratory organ              |
| Cancer | Z85.21  | ICD10 | Personal history of malignant neoplasm of larynx                                     |
| Cancer | Z85.22  | ICD10 | Personal history of malignant neoplasm of nasal cavities                             |
| Cancer | Z85.23  | ICD10 | Personal history of malignant neoplasm of thymus                                     |
| Cancer | Z85.230 | ICD10 | Personal history of malignant carcinoid tumor of thymus                              |
| Cancer | Z85.238 | ICD10 | Personal history of other malignant neoplasm of thymus                               |
| Cancer | Z85.29  | ICD10 | Personal history of malignant neoplasm of other respiratory and intrathoracic organs |
| Cancer | Z85.3   | ICD10 | Personal history of malignant neoplasm of breast                                     |
| Cancer | Z85.40  | ICD10 | Personal history of malignant neoplasm of unspecified female genital organ           |
| Cancer | Z85.41  | ICD10 | Personal history of malignant neoplasm of cervix uteri                               |
| Cancer | Z85.44  | ICD10 | Personal history of malignant neoplasm of other female genital organs                |

|        |         |       |                                                                           |
|--------|---------|-------|---------------------------------------------------------------------------|
| Cancer | Z85.45  | ICD10 | Personal history of malignant neoplasm of unspecified male genital organ  |
| Cancer | Z85.46  | ICD10 | Personal history of malignant neoplasm of prostate                        |
| Cancer | Z85.48  | ICD10 | Personal history of malignant neoplasm of epididymis                      |
| Cancer | Z85.49  | ICD10 | Personal history of malignant neoplasm of other male genital organs       |
| Cancer | Z85.5   | ICD10 | Personal history of malignant neoplasm of urinary tract                   |
| Cancer | Z85.50  | ICD10 | Personal history of malignant neoplasm of unspecified urinary tract organ |
| Cancer | Z85.54  | ICD10 | Personal history of malignant neoplasm of ureter                          |
| Cancer | Z85.59  | ICD10 | Personal history of malignant neoplasm of other urinary tract organ       |
| Cancer | Z85.7   | ICD10 | Personal history of other malignant neoplasms of lymphoid                 |
| Cancer | Z85.79  | ICD10 | Personal history of other malignant neoplasms of lymphoid                 |
| Cancer | Z85.81  | ICD10 | Personal history of malignant neoplasm of lip                             |
| Cancer | Z85.810 | ICD10 | Personal history of malignant neoplasm of tongue                          |
| Cancer | Z85.818 | ICD10 | Personal history of malignant neoplasm of other sites of lip              |
| Cancer | Z85.819 | ICD10 | Personal history of malignant neoplasm of unspecified site of lip         |
| Cancer | Z85.83  | ICD10 | Personal history of malignant neoplasm of bone and soft tissue            |
| Cancer | Z85.830 | ICD10 | Personal history of malignant neoplasm of bone                            |
| Cancer | Z85.831 | ICD10 | Personal history of malignant neoplasm of soft tissue                     |
| Cancer | Z85.840 | ICD10 | Personal history of malignant neoplasm of eye                             |
| Cancer | Z85.841 | ICD10 | Personal history of malignant neoplasm of brain                           |
| Cancer | Z85.848 | ICD10 | Personal history of malignant neoplasm of other parts of nervous tissue   |

|                        |         |       |                                                                                                    |
|------------------------|---------|-------|----------------------------------------------------------------------------------------------------|
| Cancer                 | Z85.850 | ICD10 | Personal history of malignant neoplasm of thyroid                                                  |
| Cancer                 | Z85.850 | ICD10 | Personal history of malignant neoplasm of thyroid                                                  |
| Cancer                 | Z85.858 | ICD10 | Personal history of malignant neoplasm of other endocrine glands                                   |
| Chronic kidney disease | 403     | ICD9  | Hypertensive chronic kidney disease                                                                |
| Chronic kidney disease | 403     | ICD9  | Hypertensive chronic kidney disease                                                                |
| Chronic kidney disease | 403     | ICD9  | Hypertensive chronic kidney disease                                                                |
| Chronic kidney disease | 403.01  | ICD9  | Hypertensive renal disease                                                                         |
| Chronic kidney disease | 403.1   | ICD9  | Hypertensive renal disease                                                                         |
| Chronic kidney disease | 403.1   | ICD9  | Hypertensive renal disease                                                                         |
| Chronic kidney disease | 403.11  | ICD9  | Hypertensive renal disease                                                                         |
| Chronic kidney disease | 403.9   | ICD9  | Hypertensive renal disease                                                                         |
| Chronic kidney disease | 403.9   | ICD9  | Hypertensive renal disease                                                                         |
| Chronic kidney disease | 403.91  | ICD9  | Hypertensive renal disease                                                                         |
| Chronic kidney disease | 585.1   | ICD9  | Chronic kidney disease                                                                             |
| Chronic kidney disease | 585.2   | ICD9  | Chronic kidney disease                                                                             |
| Chronic kidney disease | 585.3   | ICD9  | Chronic kidney disease                                                                             |
| Chronic kidney disease | 585.4   | ICD9  | Chronic kidney disease                                                                             |
| Chronic kidney disease | I12.0   | ICD10 | Hypertensive chronic kidney disease                                                                |
| Chronic kidney disease | I12.0   | ICD10 | Hypertensive chronic kidney disease with stage 5 chronic kidney disease or end stage renal disease |

|                                       |        |       |                                                                                         |
|---------------------------------------|--------|-------|-----------------------------------------------------------------------------------------|
| Chronic kidney disease                | I12.9  | ICD10 | Hypertensive chronic kidney disease with stage 1 through stage 4 chronic kidney disease |
| Chronic kidney disease                | N18.1  | ICD10 | Chronic kidney disease                                                                  |
| Chronic kidney disease                | N18.2  | ICD10 | Chronic kidney disease                                                                  |
| Chronic kidney disease                | N18.3  | ICD10 | Chronic kidney disease                                                                  |
| Chronic kidney disease                | N18.4  | ICD10 | Chronic kidney disease                                                                  |
| Chronic obstructive pulmonary disease | 491.2  | ICD9  | Obstructive chronic bronchitis                                                          |
| Chronic obstructive pulmonary disease | 491.2  | ICD9  | Obstructive chronic bronchitis                                                          |
| Chronic obstructive pulmonary disease | 491.21 | ICD9  | Obstructive chronic bronchitis with (acute) exacerbation                                |
| Chronic obstructive pulmonary disease | 491.22 | ICD9  | Obstructive chronic bronchitis with acute bronchitis                                    |
| Chronic obstructive pulmonary disease | 492    | ICD9  | Emphysema                                                                               |
| Chronic obstructive pulmonary disease | 492    | ICD9  | Emphysematous bleb                                                                      |
| Chronic obstructive pulmonary disease | 492.8  | ICD9  | Other emphysema                                                                         |
| Chronic obstructive pulmonary disease | 496    | ICD9  | Chronic airway obstruction                                                              |
| Chronic obstructive pulmonary disease | J44.0  | ICD10 | Other chronic obstructive pulmonary disease                                             |
| Chronic obstructive pulmonary disease | J44.0  | ICD10 | Chronic obstructive pulmonary disease with acute lower respiratory infection            |
| Chronic obstructive pulmonary disease | J44.1  | ICD10 | Chronic obstructive pulmonary disease with (acute) exacerbation                         |
| Chronic obstructive pulmonary disease | J42.0  | ICD10 | Unspecified chronic bronchitis                                                          |
| Chronic obstructive pulmonary disease | J41.0  | ICD10 | Simple and mucopurulent chronic bronchitis                                              |
| Chronic obstructive pulmonary disease | J41.0  | ICD10 | Simple chronic bronchitis                                                               |

|                                       |        |       |                                                                              |
|---------------------------------------|--------|-------|------------------------------------------------------------------------------|
| Chronic obstructive pulmonary disease | J41.1  | ICD10 | Mucopurulent chronic bronchitis                                              |
| Chronic obstructive pulmonary disease | J41.8  | ICD10 | Mixed simple and mucopurulent chronic bronchitis                             |
| Chronic obstructive pulmonary disease | J43.0  | ICD10 | Emphysema                                                                    |
| Chronic obstructive pulmonary disease | J43.0  | ICD10 | Unilateral pulmonary emphysema [MacLeod's syndrome]                          |
| Chronic obstructive pulmonary disease | J43.1  | ICD10 | Panlobular emphysema                                                         |
| Chronic obstructive pulmonary disease | J43.2  | ICD10 | Centrilobular emphysema                                                      |
| Chronic obstructive pulmonary disease | J43.8  | ICD10 | Other emphysema                                                              |
| Chronic obstructive pulmonary disease | J43.9  | ICD10 | Emphysema                                                                    |
| Chronic obstructive pulmonary disease | J44.0  | ICD10 | Other chronic obstructive pulmonary disease                                  |
| Chronic obstructive pulmonary disease | J44.0  | ICD10 | Chronic obstructive pulmonary disease with acute lower respiratory infection |
| Chronic obstructive pulmonary disease | J44.1  | ICD10 | Chronic obstructive pulmonary disease with (acute) exacerbation              |
| Chronic obstructive pulmonary disease | J44.9  | ICD10 | Chronic obstructive pulmonary disease                                        |
| Diabetes mellitus                     | 249    | ICD9  | Secondary diabetes mellitus                                                  |
| Diabetes mellitus                     | 249    | ICD9  | Secondary diabetes mellitus                                                  |
| Diabetes mellitus                     | 249    | ICD9  | Secondary diabetes mellitus                                                  |
| Diabetes mellitus                     | 249.01 | ICD9  | Secondary diabetes mellitus                                                  |
| Diabetes mellitus                     | 249.1  | ICD9  | Secondary diabetes mellitus with ketoacidosis                                |
| Diabetes mellitus                     | 249.1  | ICD9  | Secondary diabetes mellitus with ketoacidosis                                |
| Diabetes mellitus                     | 249.11 | ICD9  | Secondary diabetes mellitus with ketoacidosis                                |
| Diabetes mellitus                     | 249.2  | ICD9  | Secondary diabetes mellitus with hyperosmolarity                             |
| Diabetes mellitus                     | 249.2  | ICD9  | Secondary diabetes mellitus with hyperosmolarity                             |
| Diabetes mellitus                     | 249.21 | ICD9  | Secondary diabetes mellitus with hyperosmolarity                             |

|                   |        |      |                                                                   |
|-------------------|--------|------|-------------------------------------------------------------------|
| Diabetes mellitus | 249.3  | ICD9 | Secondary diabetes mellitus with other coma                       |
| Diabetes mellitus | 249.3  | ICD9 | Secondary diabetes mellitus with other coma                       |
| Diabetes mellitus | 249.31 | ICD9 | Secondary diabetes mellitus with other coma                       |
| Diabetes mellitus | 249.4  | ICD9 | Secondary diabetes mellitus with renal manifestations             |
| Diabetes mellitus | 249.4  | ICD9 | Secondary diabetes mellitus with renal manifestations             |
| Diabetes mellitus | 249.41 | ICD9 | Secondary diabetes mellitus with renal manifestations             |
| Diabetes mellitus | 249.5  | ICD9 | Secondary diabetes mellitus with ophthalmic manifestations        |
| Diabetes mellitus | 249.5  | ICD9 | Secondary diabetes mellitus with ophthalmic manifestations        |
| Diabetes mellitus | 249.51 | ICD9 | Secondary diabetes mellitus with ophthalmic manifestations        |
| Diabetes mellitus | 249.6  | ICD9 | Secondary diabetes mellitus with neurological manifestations      |
| Diabetes mellitus | 249.6  | ICD9 | Secondary diabetes mellitus with neurological manifestations      |
| Diabetes mellitus | 249.61 | ICD9 | Secondary diabetes mellitus with neurological manifestations      |
| Diabetes mellitus | 249.7  | ICD9 | Secondary diabetes mellitus with peripheral circulatory disorders |
| Diabetes mellitus | 249.7  | ICD9 | Secondary diabetes mellitus with peripheral circulatory disorders |
| Diabetes mellitus | 249.71 | ICD9 | Secondary diabetes mellitus with peripheral circulatory disorders |
| Diabetes mellitus | 249.8  | ICD9 | Secondary diabetes mellitus with other specified manifestations   |
| Diabetes mellitus | 249.8  | ICD9 | Secondary diabetes mellitus with other specified manifestations   |
| Diabetes mellitus | 249.81 | ICD9 | Secondary diabetes mellitus with other specified manifestations   |
| Diabetes mellitus | 249.9  | ICD9 | Secondary diabetes mellitus with unspecified complication         |
| Diabetes mellitus | 249.9  | ICD9 | Secondary diabetes mellitus with unspecified complication         |



|                   |        |      |                                                                                                                                 |
|-------------------|--------|------|---------------------------------------------------------------------------------------------------------------------------------|
| Diabetes mellitus | 249.91 | ICD9 | Secondary diabetes mellitus with unspecified complication                                                                       |
| Diabetes mellitus | 250    | ICD9 | Diabetes mellitus                                                                                                               |
| Diabetes mellitus | 250    | ICD9 | Diabetes mellitus without mention of complication                                                                               |
| Diabetes mellitus | 250    | ICD9 | type II diabetes mellitus [non-insulin dependent type] [NIDDM type] [adult-onset type] or unspecified type                      |
| Diabetes mellitus | 250.01 | ICD9 | type I diabetes mellitus [insulin dependent type] [IDDM] [juvenile type]                                                        |
| Diabetes mellitus | 250.02 | ICD9 | type II diabetes mellitus [non-insulin dependent type] [NIDDM type] [adult-onset type] or unspecified type                      |
| Diabetes mellitus | 250.03 | ICD9 | type I diabetes mellitus [juvenile type]                                                                                        |
| Diabetes mellitus | 250.1  | ICD9 | Diabetes with ketoacidosis                                                                                                      |
| Diabetes mellitus | 250.1  | ICD9 | type II diabetes mellitus [non-insulin dependent type] [NIDDM type] [adult-onset type] or unspecified type                      |
| Diabetes mellitus | 250.11 | ICD9 | type I diabetes mellitus [insulin dependent type] [IDDM] [juvenile type]                                                        |
| Diabetes mellitus | 250.12 | ICD9 | type II diabetes mellitus [non-insulin dependent type] [NIDDM type] [adult-onset type] or unspecified type                      |
| Diabetes mellitus | 250.13 | ICD9 | type I diabetes mellitus [juvenile type]                                                                                        |
| Diabetes mellitus | 250.2  | ICD9 | Diabetes mellitus with hyperosmolarity                                                                                          |
| Diabetes mellitus | 250.2  | ICD9 | Diabetes mellitus                                                                                                               |
| Diabetes mellitus | 250.21 | ICD9 | Diabetes mellitus                                                                                                               |
| Diabetes mellitus | 250.22 | ICD9 | Diabetes mellitus type II [non-insulin dependent type] [NIDDM type] [adult-onset type] or unspecified type with hyperosmolarity |
| Diabetes mellitus | 250.23 | ICD9 | Diabetes mellitus                                                                                                               |
| Diabetes mellitus | 250.3  | ICD9 | Diabetes with other coma                                                                                                        |
| Diabetes mellitus | 250.3  | ICD9 | Diabetes mellitus                                                                                                               |
| Diabetes mellitus | 250.31 | ICD9 | Diabetes mellitus                                                                                                               |
| Diabetes mellitus | 250.32 | ICD9 | Diabetes mellitus with other coma                                                                                               |
| Diabetes mellitus | 250.33 | ICD9 | Diabetes mellitus with other coma                                                                                               |
| Diabetes mellitus | 250.4  | ICD9 | Diabetes with renal manifestations                                                                                              |

|                   |        |      |                                                                                                            |
|-------------------|--------|------|------------------------------------------------------------------------------------------------------------|
| Diabetes mellitus | 250.4  | ICD9 | Diabetes mellitus type II [non-insulin dependent type] [NIDDM type] [adult-onset type] or unspecified type |
| Diabetes mellitus | 250.41 | ICD9 | Diabetes mellitus type I [insulin dependent type] [IDDM] [juvenile type]                                   |
| Diabetes mellitus | 250.42 | ICD9 | Diabetes mellitus type II [non-insulin dependent type] [NIDDM type] [adult-onset type] or unspecified type |
| Diabetes mellitus | 250.43 | ICD9 | Diabetes mellitus type I [juvenile type]                                                                   |
| Diabetes mellitus | 250.5  | ICD9 | Diabetes with ophthalmic manifestations                                                                    |
| Diabetes mellitus | 250.5  | ICD9 | Diabetes mellitus type II [non-insulin dependent type] [NIDDM type] [adult-onset type] or unspecified type |
| Diabetes mellitus | 250.51 | ICD9 | Diabetes mellitus type I [insulin dependent type] [IDDM] [juvenile type]                                   |
| Diabetes mellitus | 250.52 | ICD9 | Diabetes mellitus type II [non-insulin dependent type] [NIDDM type] [adult-onset type] or unspecified type |
| Diabetes mellitus | 250.53 | ICD9 | Diabetes mellitus type I [juvenile type]                                                                   |
| Diabetes mellitus | 250.6  | ICD9 | Diabetes with neurological manifestations                                                                  |
| Diabetes mellitus | 250.6  | ICD9 | Diabetes mellitus type II [non-insulin dependent type] [NIDDM type] [adult-onset type] or unspecified type |
| Diabetes mellitus | 250.61 | ICD9 | Diabetes mellitus type I [insulin dependent type] [IDDM] [juvenile type]                                   |
| Diabetes mellitus | 250.62 | ICD9 | Diabetes mellitus type II [non-insulin dependent type] [NIDDM type] [adult-onset type] or unspecified type |
| Diabetes mellitus | 250.63 | ICD9 | Diabetes mellitus type I [juvenile type]                                                                   |
| Diabetes mellitus | 250.7  | ICD9 | Diabetes with peripheral circulatory disorders                                                             |
| Diabetes mellitus | 250.7  | ICD9 | Diabetes mellitus type II [non-insulin dependent type] [NIDDM type] [adult-onset type] or unspecified type |
| Diabetes mellitus | 250.71 | ICD9 | Diabetes mellitus type I [insulin dependent type] [IDDM] [juvenile type]                                   |

|                   |        |       |                                                                                                                               |
|-------------------|--------|-------|-------------------------------------------------------------------------------------------------------------------------------|
| Diabetes mellitus | 250.72 | ICD9  | Diabetes mellitus type II [non-insulin dependent type] [NIDDM type] [adult-onset type] or unspecified type                    |
| Diabetes mellitus | 250.73 | ICD9  | Diabetes mellitus type I [juvenile type]                                                                                      |
| Diabetes mellitus | 250.8  | ICD9  | Diabetes with other specified manifestations                                                                                  |
| Diabetes mellitus | 250.8  | ICD9  | Diabetes mellitus type II [non-insulin dependent type] [NIDDM type] [adult-onset type] or unspecified type                    |
| Diabetes mellitus | 250.81 | ICD9  | Diabetes mellitus type I [insulin dependent type] [IDDM] [juvenile type]                                                      |
| Diabetes mellitus | 250.82 | ICD9  | Diabetes mellitus type II [non-insulin dependent type] [NIDDM type] [adult-onset type] or unspecified type                    |
| Diabetes mellitus | 250.83 | ICD9  | Diabetes mellitus type I [juvenile type]                                                                                      |
| Diabetes mellitus | 250.9  | ICD9  | Diabetes with unspecified complication                                                                                        |
| Diabetes mellitus | 250.9  | ICD9  | Diabetes mellitus type II [non-insulin dependent type] [NIDDM type] [adult-onset type] or unspecified type                    |
| Diabetes mellitus | 250.91 | ICD9  | Diabetes mellitus type I [insulin dependent type] [IDDM] [juvenile type]                                                      |
| Diabetes mellitus | 250.92 | ICD9  | Diabetes mellitus type II [non-insulin dependent type] [NIDDM type] [adult-onset type] or unspecified type                    |
| Diabetes mellitus | 250.93 | ICD9  | Diabetes mellitus type I [insulin dependent type] [IDDM] [juvenile type]                                                      |
| Diabetes mellitus | 357.2  | ICD9  | Polyneuropathy in diabetes                                                                                                    |
| Diabetes mellitus | E08    | ICD10 | Diabetes mellitus due to underlying condition                                                                                 |
| Diabetes mellitus | E08.0  | ICD10 | Diabetes mellitus due to underlying condition with hyperosmolarity                                                            |
| Diabetes mellitus | E08.00 | ICD10 | Diabetes mellitus due to underlying condition with hyperosmolarity without nonketotic hyperglycemic-hyperosmolar coma (NKHHC) |
| Diabetes mellitus | E08.01 | ICD10 | Diabetes mellitus due to underlying condition with hyperosmolarity with coma                                                  |
| Diabetes mellitus | E08.1  | ICD10 | Diabetes mellitus due to underlying condition with ketoacidosis                                                               |

|                   |          |       |                                                                                                                  |
|-------------------|----------|-------|------------------------------------------------------------------------------------------------------------------|
| Diabetes mellitus | E08.10   | ICD10 | Diabetes mellitus due to underlying condition with ketoacidosis without coma                                     |
| Diabetes mellitus | E08.11   | ICD10 | Diabetes mellitus due to underlying condition with ketoacidosis with coma                                        |
| Diabetes mellitus | E08.2    | ICD10 | Diabetes mellitus due to underlying condition with kidney complications                                          |
| Diabetes mellitus | E08.21   | ICD10 | Diabetes mellitus due to underlying condition with diabetic nephropathy                                          |
| Diabetes mellitus | E08.22   | ICD10 | Diabetes mellitus due to underlying condition with diabetic chronic kidney disease                               |
| Diabetes mellitus | E08.29   | ICD10 | Diabetes mellitus due to underlying condition with other diabetic kidney complication                            |
| Diabetes mellitus | E08.3    | ICD10 | Diabetes mellitus due to underlying condition with ophthalmic complications                                      |
| Diabetes mellitus | E08.31   | ICD10 | Diabetes mellitus due to underlying condition with unspecified diabetic retinopathy                              |
| Diabetes mellitus | E08.311  | ICD10 | Diabetes mellitus due to underlying condition with unspecified diabetic retinopathy with macular edema           |
| Diabetes mellitus | E08.319  | ICD10 | Diabetes mellitus due to underlying condition with unspecified diabetic retinopathy without macular edema        |
| Diabetes mellitus | E08.32   | ICD10 | Diabetes mellitus due to underlying condition with mild nonproliferative diabetic retinopathy                    |
| Diabetes mellitus | E08.321  | ICD10 | Diabetes mellitus due to underlying condition with mild nonproliferative diabetic retinopathy with macular edema |
| Diabetes mellitus | E08.3211 | ICD10 | Diabetes with mild nonp rtnop with macular edema                                                                 |
| Diabetes mellitus | E08.3212 | ICD10 | Diabetes with mild nonp rtnop with macular edema                                                                 |
| Diabetes mellitus | E08.3213 | ICD10 | Diabetes with mild nonp rtnop with macular edema                                                                 |

|                   |          |       |                                                                                                                         |
|-------------------|----------|-------|-------------------------------------------------------------------------------------------------------------------------|
| Diabetes mellitus | E08.3219 | ICD10 | Diabetes with mild nonp rtnop with macular edema                                                                        |
| Diabetes mellitus | E08.329  | ICD10 | Diabetes mellitus due to underlying condition with mild nonproliferative diabetic retinopathy without macular edema     |
| Diabetes mellitus | E08.3291 | ICD10 | Diabetes with mild nonp rtnop without macular edema                                                                     |
| Diabetes mellitus | E08.3292 | ICD10 | Diabetes mellitus due to underlying condition with mild nonproliferative diabetic retinopathy without macular edema     |
| Diabetes mellitus | E08.3293 | ICD10 | Diabetes with mild nonp rtnop without macular edema                                                                     |
| Diabetes mellitus | E08.3299 | ICD10 | Diabetes with mild nonp rtnop without macular edema                                                                     |
| Diabetes mellitus | E08.33   | ICD10 | Diabetes mellitus due to underlying condition with moderate nonproliferative diabetic retinopathy                       |
| Diabetes mellitus | E08.331  | ICD10 | Diabetes mellitus due to underlying condition with moderate nonproliferative diabetic retinopathy with macular edema    |
| Diabetes mellitus | E08.3311 | ICD10 | Diabetes with moderate nonp rtnop with macular edema                                                                    |
| Diabetes mellitus | E08.3312 | ICD10 | Diabetes mellitus due to underlying condition with moderate nonproliferative diabetic retinopathy with macular edema    |
| Diabetes mellitus | E08.3313 | ICD10 | Diabetes with moderate nonp rtnop with macular edema                                                                    |
| Diabetes mellitus | E08.3319 | ICD10 | Diabetes with moderate nonp rtnop with macular edema                                                                    |
| Diabetes mellitus | E08.339  | ICD10 | Diabetes mellitus due to underlying condition with moderate nonproliferative diabetic retinopathy without macular edema |

|                   |          |       |                                                                                                                         |
|-------------------|----------|-------|-------------------------------------------------------------------------------------------------------------------------|
| Diabetes mellitus | E08.3391 | ICD10 | Diabetes mellitus due to underlying condition with moderate nonproliferative diabetic retinopathy without macular edema |
| Diabetes mellitus | E08.3392 | ICD10 | Diabetes mellitus due to underlying condition with moderate nonproliferative diabetic retinopathy without macular edema |
| Diabetes mellitus | E08.3393 | ICD10 | Diabetes with moderate nonp rtnop without macular edema                                                                 |
| Diabetes mellitus | E08.3399 | ICD10 | Diabetes mellitus due to underlying condition with moderate nonproliferative diabetic retinopathy without macular edema |
| Diabetes mellitus | E08.34   | ICD10 | Diabetes mellitus due to underlying condition with severe nonproliferative diabetic retinopathy                         |
| Diabetes mellitus | E08.341  | ICD10 | Diabetes mellitus due to underlying condition with severe nonproliferative diabetic retinopathy with macular edema      |
| Diabetes mellitus | E08.3411 | ICD10 | Diabetes with severe nonp rtnop with macular edema                                                                      |
| Diabetes mellitus | E08.3412 | ICD10 | Diabetes with severe nonp rtnop with macular edema                                                                      |
| Diabetes mellitus | E08.3413 | ICD10 | Diabetes with severe nonp rtnop with macular edema                                                                      |
| Diabetes mellitus | E08.3419 | ICD10 | Diabetes with severe nonp rtnop with macular edema                                                                      |
| Diabetes mellitus | E08.349  | ICD10 | Diabetes mellitus due to underlying condition with severe nonproliferative diabetic retinopathy without macular edema   |
| Diabetes mellitus | E08.3491 | ICD10 | Diabetes with severe nonp rtnop without macular edema                                                                   |
| Diabetes mellitus | E08.3492 | ICD10 | Diabetes mellitus due to underlying condition with severe nonproliferative diabetic retinopathy without macular edema   |

|                   |          |       |                                                                                                                                             |
|-------------------|----------|-------|---------------------------------------------------------------------------------------------------------------------------------------------|
| Diabetes mellitus | E08.3493 | ICD10 | Diabetes with severe nonp rtnop without macular edema                                                                                       |
| Diabetes mellitus | E08.3499 | ICD10 | Diabetes with severe nonp rtnop without macular edema                                                                                       |
| Diabetes mellitus | E08.35   | ICD10 | Diabetes mellitus due to underlying condition with proliferative diabetic retinopathy                                                       |
| Diabetes mellitus | E08.351  | ICD10 | Diabetes mellitus due to underlying condition with proliferative diabetic retinopathy with macular edema                                    |
| Diabetes mellitus | E08.3511 | ICD10 | Diabetes mellitus due to underlying condition with proliferative diabetic retinopathy with macular edema                                    |
| Diabetes mellitus | E08.3512 | ICD10 | Diabetes mellitus due to underlying condition with proliferative diabetic retinopathy with macular edema                                    |
| Diabetes mellitus | E08.3513 | ICD10 | Diabetes with prolif diabetic rtnop with macular edema                                                                                      |
| Diabetes mellitus | E08.3519 | ICD10 | Diabetes with prolif diabetic rtnop with macular edema                                                                                      |
| Diabetes mellitus | E08.352  | ICD10 | Diabetes mellitus due to underlying condition with proliferative diabetic retinopathy with traction retinal detachment involving the macula |
| Diabetes mellitus | E08.3521 | ICD10 | Diabetes mellitus due to underlying condition with proliferative diabetic retinopathy with traction retinal detachment involving the macula |
| Diabetes mellitus | E08.3522 | ICD10 | Diabetes mellitus due to underlying condition with proliferative diabetic retinopathy with traction retinal detachment involving the macula |
| Diabetes mellitus | E08.3523 | ICD10 | Diabetes mellitus due to underlying condition with proliferative diabetic retinopathy with traction retinal detachment involving the macula |
| Diabetes mellitus | E08.3529 | ICD10 | Diabetes mellitus due to underlying condition with proliferative diabetic retinopathy with traction retinal detachment involving the macula |

|                   |          |       |                                                                                                                                                                       |
|-------------------|----------|-------|-----------------------------------------------------------------------------------------------------------------------------------------------------------------------|
| Diabetes mellitus | E08.353  | ICD10 | Diabetes mellitus due to underlying condition with proliferative diabetic retinopathy with traction retinal detachment not involving the macula                       |
| Diabetes mellitus | E08.3531 | ICD10 | Diabetes mellitus due to underlying condition with proliferative diabetic retinopathy with traction retinal detachment not involving the macula                       |
| Diabetes mellitus | E08.3532 | ICD10 | Diabetes mellitus due to underlying condition with proliferative diabetic retinopathy with traction retinal detachment not involving the macula                       |
| Diabetes mellitus | E08.3533 | ICD10 | Diabetes mellitus due to underlying condition with proliferative diabetic retinopathy with traction retinal detachment not involving the macula                       |
| Diabetes mellitus | E08.3539 | ICD10 | Diabetes mellitus due to underlying condition with proliferative diabetic retinopathy with traction retinal detachment not involving the macula                       |
| Diabetes mellitus | E08.354  | ICD10 | Diabetes mellitus due to underlying condition with proliferative diabetic retinopathy with combined traction retinal detachment and rhegmatogenous retinal detachment |
| Diabetes mellitus | E08.3541 | ICD10 | Diabetes with proliferative diabetic retinopathy with combined traction retinal detachment and rhegmatogenous retinal detachment                                      |
| Diabetes mellitus | E08.3542 | ICD10 | Diabetes with proliferative diabetic retinopathy with combined traction retinal detachment and rhegmatogenous retinal detachment                                      |
| Diabetes mellitus | E08.3543 | ICD10 | Diabetes with proliferative diabetic retinopathy with combined traction retinal detachment and rhegmatogenous retinal detachment                                      |
| Diabetes mellitus | E08.3549 | ICD10 | Diabetes with proliferative diabetic retinopathy with combined traction retinal detachment and rhegmatogenous retinal detachment                                      |
| Diabetes mellitus | E08.355  | ICD10 | Diabetes mellitus due to underlying condition with stable proliferative diabetic retinopathy                                                                          |



|                   |          |       |                                                                                                             |
|-------------------|----------|-------|-------------------------------------------------------------------------------------------------------------|
| Diabetes mellitus | E08.3551 | ICD10 | Diabetes with stable proliferative diabetic retinopathy                                                     |
| Diabetes mellitus | E08.3552 | ICD10 | Diabetes with stable proliferative diabetic retinopathy                                                     |
| Diabetes mellitus | E08.3553 | ICD10 | Diabetes with stable proliferative diabetic retinopathy                                                     |
| Diabetes mellitus | E08.3559 | ICD10 | Diabetes with stable proliferative diabetic retinopathy                                                     |
| Diabetes mellitus | E08.359  | ICD10 | Diabetes mellitus due to underlying condition with proliferative diabetic retinopathy without macular edema |
| Diabetes mellitus | E08.3591 | ICD10 | Diabetes mellitus due to underlying condition with proliferative diabetic retinopathy without macular edema |
| Diabetes mellitus | E08.3592 | ICD10 | Diabetes mellitus due to underlying condition with proliferative diabetic retinopathy without macular edema |
| Diabetes mellitus | E08.3593 | ICD10 | Diabetes mellitus due to underlying condition with proliferative diabetic retinopathy without macular edema |
| Diabetes mellitus | E08.3599 | ICD10 | Diabetes mellitus due to underlying condition with proliferative diabetic retinopathy without macular edema |
| Diabetes mellitus | E08.36   | ICD10 | Diabetes mellitus due to underlying condition with diabetic cataract                                        |
| Diabetes mellitus | E08.37   | ICD10 | Diabetes mellitus due to underlying condition with diabetic macular edema                                   |
| Diabetes mellitus | E08.37X1 | ICD10 | Diabetes mellitus due to underlying condition with diabetic macular edema                                   |
| Diabetes mellitus | E08.37X2 | ICD10 | Diabetes mellitus due to underlying condition with diabetic macular edema                                   |
| Diabetes mellitus | E08.37X3 | ICD10 | Diabetes with diabetic macular edema                                                                        |
| Diabetes mellitus | E08.37X9 | ICD10 | Diabetes mellitus due to underlying condition with diabetic macular edema                                   |
| Diabetes mellitus | E08.39   | ICD10 | Diabetes mellitus due to underlying condition with other diabetic ophthalmic complication                   |
| Diabetes mellitus | E08.4    | ICD10 | Diabetes mellitus due to underlying condition with neurological complications                               |

|                   |         |       |                                                                                                    |
|-------------------|---------|-------|----------------------------------------------------------------------------------------------------|
| Diabetes mellitus | E08.40  | ICD10 | Diabetes mellitus due to underlying condition with diabetic neuropathy                             |
| Diabetes mellitus | E08.41  | ICD10 | Diabetes mellitus due to underlying condition with diabetic mononeuropathy                         |
| Diabetes mellitus | E08.42  | ICD10 | Diabetes mellitus due to underlying condition with diabetic polyneuropathy                         |
| Diabetes mellitus | E08.43  | ICD10 | Diabetes mellitus due to underlying condition with diabetic autonomic (poly)neuropathy             |
| Diabetes mellitus | E08.44  | ICD10 | Diabetes mellitus due to underlying condition with diabetic amyotrophy                             |
| Diabetes mellitus | E08.49  | ICD10 | Diabetes mellitus due to underlying condition with other diabetic neurological complication        |
| Diabetes mellitus | E08.5   | ICD10 | Diabetes mellitus due to underlying condition with circulatory complications                       |
| Diabetes mellitus | E08.51  | ICD10 | Diabetes mellitus due to underlying condition with diabetic peripheral angiopathy without gangrene |
| Diabetes mellitus | E08.52  | ICD10 | Diabetes mellitus due to underlying condition with diabetic peripheral angiopathy with gangrene    |
| Diabetes mellitus | E08.59  | ICD10 | Diabetes mellitus due to underlying condition with other circulatory complications                 |
| Diabetes mellitus | E08.6   | ICD10 | Diabetes mellitus due to underlying condition with other specified complications                   |
| Diabetes mellitus | E08.61  | ICD10 | Diabetes mellitus due to underlying condition with diabetic arthropathy                            |
| Diabetes mellitus | E08.610 | ICD10 | Diabetes mellitus due to underlying condition with diabetic neuropathic arthropathy                |
| Diabetes mellitus | E08.618 | ICD10 | Diabetes mellitus due to underlying condition with other diabetic arthropathy                      |
| Diabetes mellitus | E08.62  | ICD10 | Diabetes mellitus due to underlying condition with skin complications                              |
| Diabetes mellitus | E08.620 | ICD10 | Diabetes mellitus due to underlying condition with diabetic necrobiosis lipoidica                  |

|                   |         |       |                                                                                                                            |
|-------------------|---------|-------|----------------------------------------------------------------------------------------------------------------------------|
| Diabetes mellitus | E08.621 | ICD10 | Diabetes mellitus due to underlying condition with foot ulcer                                                              |
| Diabetes mellitus | E08.622 | ICD10 | Diabetes mellitus due to underlying condition with other skin ulcer                                                        |
| Diabetes mellitus | E08.628 | ICD10 | Diabetes mellitus due to underlying condition with other skin complications                                                |
| Diabetes mellitus | E08.63  | ICD10 | Diabetes mellitus due to underlying condition with oral complications                                                      |
| Diabetes mellitus | E08.630 | ICD10 | Diabetes mellitus due to underlying condition with periodontal disease                                                     |
| Diabetes mellitus | E08.638 | ICD10 | Diabetes mellitus due to underlying condition with other oral complications                                                |
| Diabetes mellitus | E08.64  | ICD10 | Diabetes mellitus due to underlying condition with hypoglycemia                                                            |
| Diabetes mellitus | E08.641 | ICD10 | Diabetes mellitus due to underlying condition with hypoglycemia with coma                                                  |
| Diabetes mellitus | E08.649 | ICD10 | Diabetes mellitus due to underlying condition with hypoglycemia without coma                                               |
| Diabetes mellitus | E08.65  | ICD10 | Diabetes mellitus due to underlying condition with hyperglycemia                                                           |
| Diabetes mellitus | E08.69  | ICD10 | Diabetes mellitus due to underlying condition with other specified complication                                            |
| Diabetes mellitus | E08.8   | ICD10 | Diabetes mellitus due to underlying condition with unspecified complications                                               |
| Diabetes mellitus | E08.9   | ICD10 | Diabetes mellitus due to underlying condition without complications                                                        |
| Diabetes mellitus | E09     | ICD10 | Drug or chemical induced diabetes mellitus                                                                                 |
| Diabetes mellitus | E09.0   | ICD10 | Drug or chemical induced diabetes mellitus with hyperosmolarity                                                            |
| Diabetes mellitus | E09.00  | ICD10 | Drug or chemical induced diabetes mellitus with hyperosmolarity without nonketotic hyperglycemic-hyperosmolar coma (NKHHC) |
| Diabetes mellitus | E09.01  | ICD10 | Drug or chemical induced diabetes mellitus with hyperosmolarity with coma                                                  |
| Diabetes mellitus | E09.1   | ICD10 | Drug or chemical induced diabetes mellitus with ketoacidosis                                                               |

|    |                   |          |                                                                                                                     |
|----|-------------------|----------|---------------------------------------------------------------------------------------------------------------------|
| 1  |                   |          |                                                                                                                     |
| 2  |                   |          |                                                                                                                     |
| 3  |                   |          |                                                                                                                     |
| 4  | Diabetes mellitus | E09.10   | ICD10 Drug or chemical induced diabetes mellitus with ketoacidosis without coma                                     |
| 5  |                   |          |                                                                                                                     |
| 6  | Diabetes mellitus | E09.11   | ICD10 Drug or chemical induced diabetes mellitus with ketoacidosis with coma                                        |
| 7  |                   |          |                                                                                                                     |
| 8  |                   |          |                                                                                                                     |
| 9  | Diabetes mellitus | E09.2    | ICD10 Drug or chemical induced diabetes mellitus with kidney complications                                          |
| 10 |                   |          |                                                                                                                     |
| 11 | Diabetes mellitus | E09.21   | ICD10 Drug or chemical induced diabetes mellitus with diabetic nephropathy                                          |
| 12 |                   |          |                                                                                                                     |
| 13 |                   |          |                                                                                                                     |
| 14 | Diabetes mellitus | E09.22   | ICD10 Drug or chemical induced diabetes mellitus with diabetic chronic kidney disease                               |
| 15 |                   |          |                                                                                                                     |
| 16 |                   |          |                                                                                                                     |
| 17 | Diabetes mellitus | E09.29   | ICD10 Drug or chemical induced diabetes mellitus with other diabetic kidney complication                            |
| 18 |                   |          |                                                                                                                     |
| 19 |                   |          |                                                                                                                     |
| 20 | Diabetes mellitus | E09.3    | ICD10 Drug or chemical induced diabetes mellitus with ophthalmic complications                                      |
| 21 |                   |          |                                                                                                                     |
| 22 |                   |          |                                                                                                                     |
| 23 | Diabetes mellitus | E09.31   | ICD10 Drug or chemical induced diabetes mellitus with unspecified diabetic retinopathy                              |
| 24 |                   |          |                                                                                                                     |
| 25 |                   |          |                                                                                                                     |
| 26 | Diabetes mellitus | E09.311  | ICD10 Drug or chemical induced diabetes mellitus with unspecified diabetic retinopathy with macular edema           |
| 27 |                   |          |                                                                                                                     |
| 28 |                   |          |                                                                                                                     |
| 29 | Diabetes mellitus | E09.319  | ICD10 Drug or chemical induced diabetes mellitus with unspecified diabetic retinopathy without macular edema        |
| 30 |                   |          |                                                                                                                     |
| 31 |                   |          |                                                                                                                     |
| 32 | Diabetes mellitus | E09.32   | ICD10 Drug or chemical induced diabetes mellitus with mild nonproliferative diabetic retinopathy                    |
| 33 |                   |          |                                                                                                                     |
| 34 |                   |          |                                                                                                                     |
| 35 | Diabetes mellitus | E09.321  | ICD10 Drug or chemical induced diabetes mellitus with mild nonproliferative diabetic retinopathy with macular edema |
| 36 |                   |          |                                                                                                                     |
| 37 |                   |          |                                                                                                                     |
| 38 | Diabetes mellitus | E09.3211 | ICD10 Drug or chemical induced diabetes mellitus with mild nonproliferative diabetic retinopathy with macular edema |
| 39 |                   |          |                                                                                                                     |
| 40 |                   |          |                                                                                                                     |
| 41 | Diabetes mellitus | E09.3212 | ICD10 Drug/chem diab with mild nonp rtnop with mclr edema                                                           |
| 42 |                   |          |                                                                                                                     |
| 43 |                   |          |                                                                                                                     |
| 44 | Diabetes mellitus | E09.3213 | ICD10 Drug/chem diab with mild nonp rtnop with macular edema                                                        |
| 45 |                   |          |                                                                                                                     |
| 46 |                   |          |                                                                                                                     |
| 47 |                   |          |                                                                                                                     |
| 48 |                   |          |                                                                                                                     |
| 49 |                   |          |                                                                                                                     |
| 50 |                   |          |                                                                                                                     |
| 51 |                   |          |                                                                                                                     |
| 52 |                   |          |                                                                                                                     |
| 53 |                   |          |                                                                                                                     |
| 54 |                   |          |                                                                                                                     |
| 55 |                   |          |                                                                                                                     |
| 56 |                   |          |                                                                                                                     |
| 57 |                   |          |                                                                                                                     |
| 58 |                   |          |                                                                                                                     |
| 59 |                   |          |                                                                                                                     |
| 60 |                   |          |                                                                                                                     |

|    |                   |          |                                                                                                                            |
|----|-------------------|----------|----------------------------------------------------------------------------------------------------------------------------|
| 1  |                   |          |                                                                                                                            |
| 2  |                   |          |                                                                                                                            |
| 3  |                   |          |                                                                                                                            |
| 4  | Diabetes mellitus | E09.3219 | ICD10 Drug/chem diab with mild nonp rtnop with macular edema                                                               |
| 5  |                   |          |                                                                                                                            |
| 6  | Diabetes mellitus | E09.329  | ICD10 Drug or chemical induced diabetes mellitus with mild nonproliferative diabetic retinopathy without macular edema     |
| 7  |                   |          |                                                                                                                            |
| 8  |                   |          |                                                                                                                            |
| 9  |                   |          |                                                                                                                            |
| 10 |                   |          |                                                                                                                            |
| 11 | Diabetes mellitus | E09.3291 | ICD10 Drug/chem diab with mild nonp rtnop w/o mclr edema                                                                   |
| 12 |                   |          |                                                                                                                            |
| 13 | Diabetes mellitus | E09.3292 | ICD10 Drug/chem diab with mild nonp rtnop w/o mclr edema                                                                   |
| 14 |                   |          |                                                                                                                            |
| 15 | Diabetes mellitus | E09.3293 | ICD10 Drug/chem diab with mild nonp rtnop without mclr edema                                                               |
| 16 |                   |          |                                                                                                                            |
| 17 | Diabetes mellitus | E09.3299 | ICD10 Drug/chem diab with mild nonp rtnop without mclr edema                                                               |
| 18 |                   |          |                                                                                                                            |
| 19 | Diabetes mellitus | E09.33   | ICD10 Drug or chemical induced diabetes mellitus with moderate nonproliferative diabetic retinopathy                       |
| 20 |                   |          |                                                                                                                            |
| 21 | Diabetes mellitus | E09.331  | ICD10 Drug or chemical induced diabetes mellitus with moderate nonproliferative diabetic retinopathy with macular edema    |
| 22 |                   |          |                                                                                                                            |
| 23 | Diabetes mellitus | E09.3311 | ICD10 Drug/chem diab with mod nonp rtnop with macular edema                                                                |
| 24 |                   |          |                                                                                                                            |
| 25 | Diabetes mellitus | E09.3312 | ICD10 Drug/chem diab with mod nonp rtnop with macular edema                                                                |
| 26 |                   |          |                                                                                                                            |
| 27 | Diabetes mellitus | E09.3313 | ICD10 Drug/chem diab with mod nonp rtnop with macular edema                                                                |
| 28 |                   |          |                                                                                                                            |
| 29 | Diabetes mellitus | E09.3319 | ICD10 Drug/chem diab with mod nonp rtnop with macular edema                                                                |
| 30 |                   |          |                                                                                                                            |
| 31 | Diabetes mellitus | E09.339  | ICD10 Drug or chemical induced diabetes mellitus with moderate nonproliferative diabetic retinopathy without macular edema |
| 32 |                   |          |                                                                                                                            |
| 33 | Diabetes mellitus | E09.3391 | ICD10 Drug/chem diab with mod nonp rtnop without mclr edema                                                                |
| 34 |                   |          |                                                                                                                            |
| 35 | Diabetes mellitus | E09.3392 | ICD10 Drug/chem diab with mod nonp rtnop without mclr edema                                                                |
| 36 |                   |          |                                                                                                                            |
| 37 | Diabetes mellitus | E09.3393 | ICD10 Drug/chem diab with mod nonp rtnop without macular edema                                                             |
| 38 |                   |          |                                                                                                                            |
| 39 |                   |          |                                                                                                                            |
| 40 |                   |          |                                                                                                                            |
| 41 |                   |          |                                                                                                                            |
| 42 |                   |          |                                                                                                                            |
| 43 |                   |          |                                                                                                                            |
| 44 |                   |          |                                                                                                                            |
| 45 |                   |          |                                                                                                                            |
| 46 |                   |          |                                                                                                                            |
| 47 |                   |          |                                                                                                                            |
| 48 |                   |          |                                                                                                                            |
| 49 |                   |          |                                                                                                                            |
| 50 |                   |          |                                                                                                                            |
| 51 |                   |          |                                                                                                                            |
| 52 |                   |          |                                                                                                                            |
| 53 |                   |          |                                                                                                                            |
| 54 |                   |          |                                                                                                                            |
| 55 |                   |          |                                                                                                                            |
| 56 |                   |          |                                                                                                                            |
| 57 |                   |          |                                                                                                                            |
| 58 |                   |          |                                                                                                                            |
| 59 |                   |          |                                                                                                                            |
| 60 |                   |          |                                                                                                                            |

|    |                   |          |                                                                                                                          |
|----|-------------------|----------|--------------------------------------------------------------------------------------------------------------------------|
| 1  |                   |          |                                                                                                                          |
| 2  |                   |          |                                                                                                                          |
| 3  |                   |          |                                                                                                                          |
| 4  | Diabetes mellitus | E09.3399 | ICD10 Drug/chem diab with mod nonp rtnop without mclr edema                                                              |
| 5  |                   |          |                                                                                                                          |
| 6  | Diabetes mellitus | E09.34   | ICD10 Drug or chemical induced diabetes mellitus with severe nonproliferative diabetic retinopathy                       |
| 7  |                   |          |                                                                                                                          |
| 8  |                   |          |                                                                                                                          |
| 9  |                   |          |                                                                                                                          |
| 10 |                   |          |                                                                                                                          |
| 11 | Diabetes mellitus | E09.341  | ICD10 Drug or chemical induced diabetes mellitus with severe nonproliferative diabetic retinopathy with macular edema    |
| 12 |                   |          |                                                                                                                          |
| 13 |                   |          |                                                                                                                          |
| 14 |                   |          |                                                                                                                          |
| 15 | Diabetes mellitus | E09.3411 | ICD10 Drug/chem diab with severe nonp rtnop with mclr edema                                                              |
| 16 |                   |          |                                                                                                                          |
| 17 |                   |          |                                                                                                                          |
| 18 | Diabetes mellitus | E09.3412 | ICD10 Drug/chem diab with severe nonp rtnop with mclr edema                                                              |
| 19 |                   |          |                                                                                                                          |
| 20 |                   |          |                                                                                                                          |
| 21 | Diabetes mellitus | E09.3413 | ICD10 Drug/chem diab with severe nonp rtnop with macular edema                                                           |
| 22 |                   |          |                                                                                                                          |
| 23 |                   |          |                                                                                                                          |
| 24 | Diabetes mellitus | E09.3419 | ICD10 Drug/chem diab with severe nonp rtnop with mclr edema                                                              |
| 25 |                   |          |                                                                                                                          |
| 26 |                   |          |                                                                                                                          |
| 27 | Diabetes mellitus | E09.349  | ICD10 Drug or chemical induced diabetes mellitus with severe nonproliferative diabetic retinopathy without macular edema |
| 28 |                   |          |                                                                                                                          |
| 29 |                   |          |                                                                                                                          |
| 30 |                   |          |                                                                                                                          |
| 31 | Diabetes mellitus | E09.3491 | ICD10 Drug/chem diab with severe nonp rtnop w/o mclr edema                                                               |
| 32 |                   |          |                                                                                                                          |
| 33 |                   |          |                                                                                                                          |
| 34 | Diabetes mellitus | E09.3492 | ICD10 Drug/chem diab with severe nonp rtnop w/o mclr edema                                                               |
| 35 |                   |          |                                                                                                                          |
| 36 |                   |          |                                                                                                                          |
| 37 | Diabetes mellitus | E09.3493 | ICD10 Drug/chem diab with severe nonp rtnop without mclr edema                                                           |
| 38 |                   |          |                                                                                                                          |
| 39 |                   |          |                                                                                                                          |
| 40 | Diabetes mellitus | E09.3499 | ICD10 Drug/chem diab with severe nonp rtnop w/o mclr edema                                                               |
| 41 |                   |          |                                                                                                                          |
| 42 |                   |          |                                                                                                                          |
| 43 | Diabetes mellitus | E09.35   | ICD10 Drug or chemical induced diabetes mellitus with proliferative diabetic retinopathy                                 |
| 44 |                   |          |                                                                                                                          |
| 45 |                   |          |                                                                                                                          |
| 46 | Diabetes mellitus | E09.351  | ICD10 Drug or chemical induced diabetes mellitus with proliferative diabetic retinopathy with macular edema              |
| 47 |                   |          |                                                                                                                          |
| 48 |                   |          |                                                                                                                          |
| 49 |                   |          |                                                                                                                          |
| 50 | Diabetes mellitus | E09.3511 | ICD10 Drug/chem diab with prolif diab rtnop with mclr edema                                                              |
| 51 |                   |          |                                                                                                                          |
| 52 |                   |          |                                                                                                                          |
| 53 | Diabetes mellitus | E09.3512 | ICD10 Drug/chem diab with prolif diab rtnop with mclr edema                                                              |
| 54 |                   |          |                                                                                                                          |
| 55 |                   |          |                                                                                                                          |
| 56 |                   |          |                                                                                                                          |
| 57 |                   |          |                                                                                                                          |
| 58 |                   |          |                                                                                                                          |
| 59 |                   |          |                                                                                                                          |
| 60 |                   |          |                                                                                                                          |

|                   |          |       |                                                                                                                                                                    |
|-------------------|----------|-------|--------------------------------------------------------------------------------------------------------------------------------------------------------------------|
| Diabetes mellitus | E09.3513 | ICD10 | Drug/chem diab with prolif diab rtnop with macular edema                                                                                                           |
| Diabetes mellitus | E09.3519 | ICD10 | Drug/chem diab with prolif diab rtnop with mclr edema                                                                                                              |
| Diabetes mellitus | E09.352  | ICD10 | Drug or chemical induced diabetes mellitus with proliferative diabetic retinopathy with traction retinal detachment involving the macula                           |
| Diabetes mellitus | E09.3521 | ICD10 | Drug/chem diab w prolif diab rtnop w trctn dtch macula                                                                                                             |
| Diabetes mellitus | E09.3522 | ICD10 | Drug/chem diab w prolif diab rtnop w trctn dtch macula                                                                                                             |
| Diabetes mellitus | E09.3523 | ICD10 | Drug/chem diab w prolif diab rtnop w trctn dtch macula                                                                                                             |
| Diabetes mellitus | E09.3529 | ICD10 | Drug/chem diab w prolif diab rtnop w trctn dtch macula                                                                                                             |
| Diabetes mellitus | E09.353  | ICD10 | Drug or chemical induced diabetes mellitus with proliferative diabetic retinopathy with traction retinal detachment not involving the macula                       |
| Diabetes mellitus | E09.3531 | ICD10 | Drug/chem diab w prolif diab rtnop w trctn dtch n-mcla                                                                                                             |
| Diabetes mellitus | E09.3532 | ICD10 | Drug/chem diab w prolif diab rtnop w trctn dtch n-mcla                                                                                                             |
| Diabetes mellitus | E09.3533 | ICD10 | Drug/chem diab w prolif diab rtnop w trctn dtch n-mcla                                                                                                             |
| Diabetes mellitus | E09.3539 | ICD10 | Drug/chem diab w prolif diab rtnop w trctn dtch n-mcla                                                                                                             |
| Diabetes mellitus | E09.354  | ICD10 | Drug or chemical induced diabetes mellitus with proliferative diabetic retinopathy with combined traction retinal detachment and rhegmatogenous retinal detachment |
| Diabetes mellitus | E09.3541 | ICD10 | Drug/chem diab w prolif diab rtnop with comb detach                                                                                                                |
| Diabetes mellitus | E09.3542 | ICD10 | Drug/chem diab w prolif diab rtnop with comb detach                                                                                                                |
| Diabetes mellitus | E09.3543 | ICD10 | Drug/chem diab with prolif diab rtnop with comb detach                                                                                                             |

|    |                   |          |                                                                                                                |
|----|-------------------|----------|----------------------------------------------------------------------------------------------------------------|
| 1  |                   |          |                                                                                                                |
| 2  |                   |          |                                                                                                                |
| 3  |                   |          |                                                                                                                |
| 4  | Diabetes mellitus | E09.3549 | ICD10 Drug/chem diab with prolif diab rtnop with comb detach                                                   |
| 5  |                   |          |                                                                                                                |
| 6  | Diabetes mellitus | E09.355  | ICD10 Drug or chemical induced diabetes mellitus with stable proliferative diabetic retinopathy                |
| 7  |                   |          |                                                                                                                |
| 8  |                   |          |                                                                                                                |
| 9  |                   |          |                                                                                                                |
| 10 | Diabetes mellitus | E09.3551 | ICD10 Drug/chem diabetes with stable prolif diabetic rtnop                                                     |
| 11 |                   |          |                                                                                                                |
| 12 | Diabetes mellitus | E09.3552 | ICD10 Drug/chem diab with stable prolif diabetic rtnop                                                         |
| 13 |                   |          |                                                                                                                |
| 14 | Diabetes mellitus | E09.3553 | ICD10 Drug/chem diabetes with stable prolif diabetic rtnop                                                     |
| 15 |                   |          |                                                                                                                |
| 16 | Diabetes mellitus | E09.3559 | ICD10 Drug/chem diabetes with stable prolif diabetic rtnop                                                     |
| 17 |                   |          |                                                                                                                |
| 18 | Diabetes mellitus | E09.359  | ICD10 Drug or chemical induced diabetes mellitus with proliferative diabetic retinopathy without macular edema |
| 19 |                   |          |                                                                                                                |
| 20 | Diabetes mellitus | E09.3591 | ICD10 Drug/chem diab with prolif diab rtnop w/o mclr edema                                                     |
| 21 |                   |          |                                                                                                                |
| 22 | Diabetes mellitus | E09.3592 | ICD10 Drug/chem diab with prolif diab rtnop w/o mclr edema                                                     |
| 23 |                   |          |                                                                                                                |
| 24 | Diabetes mellitus | E09.3593 | ICD10 Drug/chem diab with prolif diab rtnop without mclr edema                                                 |
| 25 |                   |          |                                                                                                                |
| 26 | Diabetes mellitus | E09.3599 | ICD10 Drug/chem diab with prolif diab rtnop w/o mclr edema                                                     |
| 27 |                   |          |                                                                                                                |
| 28 | Diabetes mellitus | E09.36   | ICD10 Drug or chemical induced diabetes mellitus with diabetic cataract                                        |
| 29 |                   |          |                                                                                                                |
| 30 | Diabetes mellitus | E09.37   | ICD10 Drug or chemical induced diabetes mellitus with diabetic macular edema                                   |
| 31 |                   |          |                                                                                                                |
| 32 | Diabetes mellitus | E09.37X1 | ICD10 Drug/chem diab w diab mclr edma                                                                          |
| 33 |                   |          |                                                                                                                |
| 34 | Diabetes mellitus | E09.37X2 | ICD10 Drug/chem diab w diab mclr edma                                                                          |
| 35 |                   |          |                                                                                                                |
| 36 | Diabetes mellitus | E09.37X3 | ICD10 Drug/chem diab with diab mclr edema                                                                      |
| 37 |                   |          |                                                                                                                |
| 38 | Diabetes mellitus | E09.37X9 | ICD10 Drug/chem diab with diab mclr edma                                                                       |
| 39 |                   |          |                                                                                                                |
| 40 | Diabetes mellitus | E09.39   | ICD10 Drug/chem diabetes w oth diabetic ophthalmic complication                                                |
| 41 |                   |          |                                                                                                                |
| 42 | Diabetes mellitus | E09.4    | ICD10 Drug or chemical induced diabetes mellitus with neurological complications                               |
| 43 |                   |          |                                                                                                                |
| 44 | Diabetes mellitus | E09.40   | ICD10 Drug or chemical induced diabetes mellitus with neurological complications with diabetic neuropathy      |
| 45 |                   |          |                                                                                                                |
| 46 |                   |          |                                                                                                                |
| 47 |                   |          |                                                                                                                |
| 48 |                   |          |                                                                                                                |
| 49 |                   |          |                                                                                                                |
| 50 |                   |          |                                                                                                                |
| 51 |                   |          |                                                                                                                |
| 52 |                   |          |                                                                                                                |
| 53 |                   |          |                                                                                                                |
| 54 |                   |          |                                                                                                                |
| 55 |                   |          |                                                                                                                |
| 56 |                   |          |                                                                                                                |
| 57 |                   |          |                                                                                                                |
| 58 |                   |          |                                                                                                                |
| 59 |                   |          |                                                                                                                |
| 60 |                   |          |                                                                                                                |



|                   |         |       |                                                                                                                     |
|-------------------|---------|-------|---------------------------------------------------------------------------------------------------------------------|
| Diabetes mellitus | E09.41  | ICD10 | Drug/chem diabetes w neuro comp w diabetic mononeuropathy                                                           |
| Diabetes mellitus | E09.42  | ICD10 | Drug or chemical induced diabetes mellitus with neurological complications with diabetic polyneuropathy             |
| Diabetes mellitus | E09.43  | ICD10 | Drug or chemical induced diabetes mellitus with neurological complications with diabetic autonomic (poly)neuropathy |
| Diabetes mellitus | E09.44  | ICD10 | Drug/chem diabetes w neurological comp w diabetic amyotrophy                                                        |
| Diabetes mellitus | E09.49  | ICD10 | Drug/chem diabetes w neuro comp w oth diabetic neuro comp                                                           |
| Diabetes mellitus | E09.5   | ICD10 | Drug or chemical induced diabetes mellitus with circulatory complications                                           |
| Diabetes mellitus | E09.51  | ICD10 | Drug or chemical induced diabetes mellitus with diabetic peripheral angiopathy without gangrene                     |
| Diabetes mellitus | E09.52  | ICD10 | Drug/chem diabetes w diabetic prph angiopath w gangrene                                                             |
| Diabetes mellitus | E09.59  | ICD10 | Drug/chem diabetes mellitus w oth circulatory complications                                                         |
| Diabetes mellitus | E09.6   | ICD10 | Drug or chemical induced diabetes mellitus with other specified complications                                       |
| Diabetes mellitus | E09.61  | ICD10 | Drug or chemical induced diabetes mellitus with diabetic arthropathy                                                |
| Diabetes mellitus | E09.610 | ICD10 | Drug/chem diabetes w diabetic neuropathic arthropathy                                                               |
| Diabetes mellitus | E09.618 | ICD10 | Drug/chem diabetes mellitus w oth diabetic arthropathy                                                              |
| Diabetes mellitus | E09.62  | ICD10 | Drug or chemical induced diabetes mellitus with skin complications                                                  |
| Diabetes mellitus | E09.620 | ICD10 | Drug/chem diabetes mellitus w diabetic dermatitis                                                                   |
| Diabetes mellitus | E09.621 | ICD10 | Drug or chemical induced diabetes mellitus with foot ulcer                                                          |
| Diabetes mellitus | E09.622 | ICD10 | Drug or chemical induced diabetes mellitus with other skin ulcer                                                    |

|                   |         |       |                                                                                                                   |
|-------------------|---------|-------|-------------------------------------------------------------------------------------------------------------------|
| Diabetes mellitus | E09.628 | ICD10 | Drug/chem diabetes mellitus w oth skin complications                                                              |
| Diabetes mellitus | E09.63  | ICD10 | Drug or chemical induced diabetes mellitus with oral complications                                                |
| Diabetes mellitus | E09.630 | ICD10 | Drug/chem diabetes mellitus w periodontal disease                                                                 |
| Diabetes mellitus | E09.638 | ICD10 | Drug/chem diabetes mellitus w oth oral complications                                                              |
| Diabetes mellitus | E09.64  | ICD10 | Drug or chemical induced diabetes mellitus with hypoglycemia                                                      |
| Diabetes mellitus | E09.641 | ICD10 | Drug/chem diabetes mellitus w hypoglycemia w coma                                                                 |
| Diabetes mellitus | E09.649 | ICD10 | Drug or chemical induced diabetes mellitus with hypoglycemia without coma                                         |
| Diabetes mellitus | E09.65  | ICD10 | Drug or chemical induced diabetes mellitus with hyperglycemia                                                     |
| Diabetes mellitus | E09.69  | ICD10 | Drug or chemical induced diabetes mellitus with other specified complication                                      |
| Diabetes mellitus | E09.8   | ICD10 | Drug or chemical induced diabetes mellitus with unspecified complications                                         |
| Diabetes mellitus | E09.9   | ICD10 | Drug or chemical induced diabetes mellitus without complications                                                  |
| Diabetes mellitus | E13.0   | ICD10 | Other specified diabetes mellitus                                                                                 |
| Diabetes mellitus | E13.0   | ICD10 | Other specified diabetes mellitus with hyperosmolarity                                                            |
| Diabetes mellitus | E13.00  | ICD10 | Other specified diabetes mellitus with hyperosmolarity without nonketotic hyperglycemic-hyperosmolar coma (NKHHC) |
| Diabetes mellitus | E13.01  | ICD10 | Other specified diabetes mellitus with hyperosmolarity with coma                                                  |
| Diabetes mellitus | E13.1   | ICD10 | Other specified diabetes mellitus with ketoacidosis                                                               |
| Diabetes mellitus | E13.10  | ICD10 | Other specified diabetes mellitus with ketoacidosis without coma                                                  |
| Diabetes mellitus | E13.11  | ICD10 | Other specified diabetes mellitus with ketoacidosis with coma                                                     |

|                   |          |       |                                                                                 |
|-------------------|----------|-------|---------------------------------------------------------------------------------|
| Diabetes mellitus | E13.2    | ICD10 | Other specified diabetes mellitus with kidney complications                     |
| Diabetes mellitus | E13.21   | ICD10 | Other specified diabetes mellitus with diabetic nephropathy                     |
| Diabetes mellitus | E13.22   | ICD10 | Other specified diabetes mellitus with diabetic chronic kidney disease          |
| Diabetes mellitus | E13.29   | ICD10 | Other specified diabetes mellitus with other diabetic kidney complication       |
| Diabetes mellitus | E13.3    | ICD10 | Other specified diabetes mellitus with ophthalmic complications                 |
| Diabetes mellitus | E13.36   | ICD10 | Other specified diabetes mellitus with diabetic cataract                        |
| Diabetes mellitus | E13.37   | ICD10 | Other specified diabetes mellitus with diabetic macular edema                   |
| Diabetes mellitus | E13.37X1 | ICD10 | Other specified diabetes mellitus with diabetic macular edema                   |
| Diabetes mellitus | E13.37X2 | ICD10 | Other specified diabetes mellitus with diabetic macular edema                   |
| Diabetes mellitus | E13.37X3 | ICD10 | Other specified diabetes mellitus with diabetic macular edema                   |
| Diabetes mellitus | E13.37X9 | ICD10 | Other specified diabetes mellitus with diabetic macular edema                   |
| Diabetes mellitus | E13.39   | ICD10 | Other specified diabetes mellitus with other diabetic ophthalmic complication   |
| Diabetes mellitus | E13.4    | ICD10 | Other specified diabetes mellitus with neurological complications               |
| Diabetes mellitus | E13.40   | ICD10 | Other specified diabetes mellitus with diabetic neuropathy                      |
| Diabetes mellitus | E13.41   | ICD10 | Other specified diabetes mellitus with diabetic mononeuropathy                  |
| Diabetes mellitus | E13.42   | ICD10 | Other specified diabetes mellitus with diabetic polyneuropathy                  |
| Diabetes mellitus | E13.43   | ICD10 | Other specified diabetes mellitus with diabetic autonomic (poly)neuropathy      |
| Diabetes mellitus | E13.44   | ICD10 | Other specified diabetes mellitus with diabetic amyotrophy                      |
| Diabetes mellitus | E13.49   | ICD10 | Other specified diabetes mellitus with other diabetic neurological complication |
| Diabetes mellitus | E13.5    | ICD10 | Other specified diabetes mellitus with circulatory complications                |

|    |                   |         |       |                                        |
|----|-------------------|---------|-------|----------------------------------------|
| 1  |                   |         |       |                                        |
| 2  |                   |         |       |                                        |
| 3  |                   |         |       |                                        |
| 4  |                   |         |       | Other specified diabetes mellitus with |
| 5  |                   |         |       | diabetic peripheral angiopathy without |
| 6  | Diabetes mellitus | E13.51  | ICD10 | gangrene                               |
| 7  |                   |         |       | Other specified diabetes mellitus with |
| 8  |                   |         |       | diabetic peripheral angiopathy with    |
| 9  |                   |         |       | gangrene                               |
| 10 | Diabetes mellitus | E13.52  | ICD10 |                                        |
| 11 |                   |         |       | Other specified diabetes mellitus with |
| 12 |                   |         |       | other circulatory complications        |
| 13 | Diabetes mellitus | E13.59  | ICD10 |                                        |
| 14 |                   |         |       | Other specified diabetes mellitus with |
| 15 |                   |         |       | other specified complications          |
| 16 | Diabetes mellitus | E13.6   | ICD10 |                                        |
| 17 |                   |         |       | Other specified diabetes mellitus with |
| 18 |                   |         |       | diabetic arthropathy                   |
| 19 | Diabetes mellitus | E13.61  | ICD10 |                                        |
| 20 |                   |         |       | Other specified diabetes mellitus with |
| 21 |                   |         |       | diabetic neuropathic arthropathy       |
| 22 | Diabetes mellitus | E13.610 | ICD10 |                                        |
| 23 |                   |         |       | Other specified diabetes mellitus with |
| 24 |                   |         |       | other diabetic arthropathy             |
| 25 | Diabetes mellitus | E13.618 | ICD10 |                                        |
| 26 |                   |         |       | Other specified diabetes mellitus with |
| 27 |                   |         |       | skin complications                     |
| 28 | Diabetes mellitus | E13.62  | ICD10 |                                        |
| 29 |                   |         |       | Other specified diabetes mellitus with |
| 30 |                   |         |       | diabetic necrobiosis lipoidica         |
| 31 | Diabetes mellitus | E13.620 | ICD10 |                                        |
| 32 |                   |         |       | Other specified diabetes mellitus with |
| 33 |                   |         |       | foot ulcer                             |
| 34 | Diabetes mellitus | E13.621 | ICD10 |                                        |
| 35 |                   |         |       | Other specified diabetes mellitus with |
| 36 |                   |         |       | other skin ulcer                       |
| 37 | Diabetes mellitus | E13.622 | ICD10 |                                        |
| 38 |                   |         |       | Other specified diabetes mellitus with |
| 39 |                   |         |       | other skin complications               |
| 40 | Diabetes mellitus | E13.628 | ICD10 |                                        |
| 41 |                   |         |       | Other specified diabetes mellitus with |
| 42 |                   |         |       | oral complications                     |
| 43 | Diabetes mellitus | E13.63  | ICD10 |                                        |
| 44 |                   |         |       | Other specified diabetes mellitus with |
| 45 |                   |         |       | periodontal disease                    |
| 46 | Diabetes mellitus | E13.630 | ICD10 |                                        |
| 47 |                   |         |       | Other specified diabetes mellitus with |
| 48 |                   |         |       | other oral complications               |
| 49 | Diabetes mellitus | E13.638 | ICD10 |                                        |
| 50 |                   |         |       | Other specified diabetes mellitus with |
| 51 |                   |         |       | hypoglycemia                           |
| 52 | Diabetes mellitus | E13.64  | ICD10 |                                        |
| 53 |                   |         |       | Other specified diabetes mellitus with |
| 54 |                   |         |       | hypoglycemia with coma                 |
| 55 | Diabetes mellitus | E13.641 | ICD10 |                                        |
| 56 |                   |         |       | Other specified diabetes mellitus with |
| 57 |                   |         |       | hypoglycemia without coma              |
| 58 | Diabetes mellitus | E13.649 | ICD10 |                                        |
| 59 |                   |         |       | Other specified diabetes mellitus with |
| 60 |                   |         |       | hyperglycemia                          |

|                   |        |       |                                                                     |
|-------------------|--------|-------|---------------------------------------------------------------------|
| Diabetes mellitus | E13.69 | ICD10 | Other specified diabetes mellitus with other specified complication |
| Diabetes mellitus | E13.8  | ICD10 | Other specified diabetes mellitus with unspecified complications    |
| Diabetes mellitus | E13.9  | ICD10 | Other specified diabetes mellitus without complications             |
| Heart failure     | 428    | ICD9  | Heart failure                                                       |
| Heart failure     | 428    | ICD9  | Congestive heart failure (CHF) NOS                                  |
| Heart failure     | 428    | ICD9  | Congestive heart failure (CHF) NOS **                               |
| Heart failure     | 428.1  | ICD9  | Left heart failure                                                  |
| Heart failure     | 428.2  | ICD9  | Systolic heart failure                                              |
| Heart failure     | 428.2  | ICD9  | Systolic heart failure                                              |
| Heart failure     | 428.21 | ICD9  | Systolic heart failure                                              |
| Heart failure     | 428.22 | ICD9  | Systolic heart failure                                              |
| Heart failure     | 428.23 | ICD9  | Systolic heart failure                                              |
| Heart failure     | 428.3  | ICD9  | Diastolic heart failure                                             |
| Heart failure     | 428.3  | ICD9  | Diastolic heart failure                                             |
| Heart failure     | 428.31 | ICD9  | Diastolic heart failure                                             |
| Heart failure     | 428.32 | ICD9  | Diastolic heart failure                                             |
| Heart failure     | 428.33 | ICD9  | Diastolic heart failure                                             |
| Heart failure     | 428.4  | ICD9  | Combined systolic and diastolic heart failure                       |
| Heart failure     | 428.4  | ICD9  | Combined systolic and diastolic heart failure                       |
| Heart failure     | 428.41 | ICD9  | Combined systolic and diastolic heart failure                       |
| Heart failure     | 428.42 | ICD9  | Combined systolic and diastolic heart failure                       |
| Heart failure     | 428.43 | ICD9  | Combined systolic and diastolic heart failure                       |
| Heart failure     | 428.9  | ICD9  | Heart failure unspecified                                           |
| Heart failure     | I50    | ICD10 | Heart failure                                                       |
| Heart failure     | I50.1  | ICD10 | Left ventricular failure                                            |
| Heart failure     | I50.2  | ICD10 | Systolic (congestive) heart failure                                 |
| Heart failure     | I50.20 | ICD10 | Unspecified systolic (congestive) heart failure                     |
| Heart failure     | I50.21 | ICD10 | Acute systolic (congestive) heart failure                           |
| Heart failure     | I50.22 | ICD10 | Chronic systolic (congestive) heart failure                         |
| Heart failure     | I50.23 | ICD10 | Acute on chronic systolic (congestive) heart failure                |

|               |         |       |                                                                                          |
|---------------|---------|-------|------------------------------------------------------------------------------------------|
| Heart failure | I50.3   | ICD10 | Diastolic (congestive) heart failure                                                     |
|               |         |       | Unspecified diastolic (congestive) heart failure                                         |
| Heart failure | I50.30  | ICD10 | failure                                                                                  |
| Heart failure | I50.31  | ICD10 | Acute diastolic (congestive) heart failure                                               |
|               |         |       |                                                                                          |
| Heart failure | I50.32  | ICD10 | Chronic diastolic (congestive) heart failure                                             |
|               |         |       | Acute on chronic diastolic (congestive) heart failure                                    |
| Heart failure | I50.33  | ICD10 | heart failure                                                                            |
|               |         |       | Combined systolic (congestive) and diastolic (congestive) heart failure                  |
| Heart failure | I50.4   | ICD10 |                                                                                          |
|               |         |       | Unspecified combined systolic (congestive) and diastolic (congestive) heart failure      |
| Heart failure | I50.40  | ICD10 | heart failure                                                                            |
|               |         |       | Acute combined systolic (congestive) and diastolic (congestive) heart failure            |
| Heart failure | I50.41  | ICD10 | heart failure                                                                            |
|               |         |       | Chronic combined systolic (congestive) and diastolic (congestive) heart failure          |
| Heart failure | I50.42  | ICD10 | heart failure                                                                            |
|               |         |       | Acute on chronic combined systolic (congestive) and diastolic (congestive) heart failure |
| Heart failure | I50.43  | ICD10 | heart failure                                                                            |
| Heart failure | I50.8   | ICD10 | Other heart failure                                                                      |
| Heart failure | I50.81  | ICD10 | Right heart failure                                                                      |
| Heart failure | I50.810 | ICD10 | Right ventricular failure NOS                                                            |
| Heart failure | I50.811 | ICD10 | Acute right heart failure                                                                |
| Heart failure | I50.812 | ICD10 | Chronic right heart failure                                                              |
| Heart failure | I50.813 | ICD10 | Acute on chronic right heart failure                                                     |
|               |         |       | Right ventricular failure secondary to left ventricular failure                          |
| Heart failure | I50.814 | ICD10 | ventricular failure                                                                      |
| Heart failure | I50.82  | ICD10 | Biventricular heart failure                                                              |
| Heart failure | I50.83  | ICD10 | High output heart failure                                                                |
| Heart failure | I50.84  | ICD10 | Stage D heart failure                                                                    |
| Heart failure | I50.89  | ICD10 | Other heart failure                                                                      |
| Heart failure | I50.9   | ICD10 | Heart failure                                                                            |
| Hypertension  | 401     | ICD9  | Essential hypertension                                                                   |
| Hypertension  | 401.1   | ICD9  | Benign essential hypertension                                                            |
| Hypertension  | 401.9   | ICD9  | Hypertension NOS                                                                         |
| Hypertension  | 459.3   | ICD9  | Chronic venous hypertension (idiopathic)                                                 |
|               |         |       | Chronic venous hypertension without complications                                        |
| Hypertension  | 459.3   | ICD9  | complications                                                                            |
| Hypertension  | 459.31  | ICD9  | Chronic venous hypertension with ulcer                                                   |

|              |         |       |                                                                                         |
|--------------|---------|-------|-----------------------------------------------------------------------------------------|
| Hypertension | 459.32  | ICD9  | Chronic venous hypertension with inflammation                                           |
| Hypertension | 459.33  | ICD9  | Chronic venous hypertension with ulcer and inflammation                                 |
| Hypertension | 459.39  | ICD9  | Chronic venous hypertension with other complication                                     |
| Hypertension | 642     | ICD9  | Hypertension complicating pregnancy                                                     |
| Hypertension | 642.04  | ICD9  | Benign essential hypertension                                                           |
| Hypertension | 642.1   | ICD9  | Hypertension secondary to renal disease                                                 |
| Hypertension | 642.1   | ICD9  | Hypertension secondary to renal disease                                                 |
| Hypertension | 642.11  | ICD9  | Hypertension secondary to renal disease                                                 |
| Hypertension | 642.12  | ICD9  | Hypertension secondary to renal disease                                                 |
| Hypertension | 642.13  | ICD9  | Hypertension secondary to renal disease                                                 |
| Hypertension | 642.14  | ICD9  | Hypertension secondary to renal disease                                                 |
| Hypertension | 642.2   | ICD9  | Other pre-existing hypertension complicating pregnancy                                  |
| Hypertension | 642.2   | ICD9  | Other pre-existing hypertension complicating pregnancy                                  |
| Hypertension | 642.21  | ICD9  | Other pre-existing hypertension                                                         |
| Hypertension | 642.22  | ICD9  | Other pre-existing hypertension                                                         |
| Hypertension | 642.23  | ICD9  | Other pre-existing hypertension                                                         |
| Hypertension | 642.24  | ICD9  | Other pre-existing hypertension                                                         |
| Hypertension | 642.9   | ICD9  | Unspecified hypertension complicating pregnancy                                         |
| Hypertension | 642.9   | ICD9  | Unspecified hypertension complicating pregnancy                                         |
| Hypertension | 642.91  | ICD9  | Unspecified hypertension                                                                |
| Hypertension | 642.92  | ICD9  | Unspecified hypertension                                                                |
| Hypertension | 642.93  | ICD9  | Unspecified antepartum hypertension                                                     |
| Hypertension | 642.94  | ICD9  | Unspecified postpartum hypertension                                                     |
| Hypertension | 997.91  | ICD9  | Hypertension                                                                            |
| Hypertension | I10     | ICD10 | Essential (primary) hypertension                                                        |
| Hypertension | I27.0   | ICD10 | Primary pulmonary hypertension                                                          |
| Hypertension | I87.3   | ICD10 | Chronic venous hypertension (idiopathic)                                                |
| Hypertension | I87.30  | ICD10 | Chronic venous hypertension (idiopathic) without complications                          |
| Hypertension | I87.301 | ICD10 | Chronic venous hypertension (idiopathic) without complications of right lower extremity |

|              |         |       |                                                                                               |
|--------------|---------|-------|-----------------------------------------------------------------------------------------------|
| Hypertension | I87.302 | ICD10 | Chronic venous hypertension (idiopathic) without complications of left lower extremity        |
| Hypertension | I87.303 | ICD10 | Chronic venous hypertension (idiopathic) without complications of bilateral lower extremity   |
| Hypertension | I87.309 | ICD10 | Chronic venous hypertension (idiopathic) without complications of unspecified lower extremity |
| Hypertension | I87.31  | ICD10 | Chronic venous hypertension (idiopathic) with ulcer                                           |
| Hypertension | I87.311 | ICD10 | Chronic venous hypertension (idiopathic) with ulcer of right lower extremity                  |
| Hypertension | I87.312 | ICD10 | Chronic venous hypertension (idiopathic) with ulcer of left lower extremity                   |
| Hypertension | I87.313 | ICD10 | Chronic venous hypertension (idiopathic) with ulcer of bilateral lower extremity              |
| Hypertension | I87.319 | ICD10 | Chronic venous hypertension (idiopathic) with ulcer of unspecified lower extremity            |
| Hypertension | I87.32  | ICD10 | Chronic venous hypertension (idiopathic) with inflammation                                    |
| Hypertension | I87.321 | ICD10 | Chronic venous hypertension w inflammation of r low extrem                                    |
| Hypertension | I87.322 | ICD10 | Chronic venous hypertension (idiopathic) with inflammation of left lower extremity            |
| Hypertension | I87.323 | ICD10 | Chronic venous hypertension (idiopathic) with inflammation of bilateral lower extremity       |
| Hypertension | I87.329 | ICD10 | Chronic venous hypertension w inflammation of unsp low extrm                                  |
| Hypertension | I87.33  | ICD10 | Chronic venous hypertension (idiopathic) with ulcer and inflammation                          |
| Hypertension | I87.331 | ICD10 | Chronic venous hypertension (idiopathic) with ulcer and inflammation of right lower extremity |
| Hypertension | I87.332 | ICD10 | Chronic venous hypertension (idiopathic) with ulcer and inflammation of left lower extremity  |



|              |         |       |                                                                                                     |
|--------------|---------|-------|-----------------------------------------------------------------------------------------------------|
| Hypertension | I87.333 | ICD10 | Chronic venous hypertension (idiopathic) with ulcer and inflammation of bilateral lower extremity   |
| Hypertension | I87.339 | ICD10 | Chronic venous hypertension (idiopathic) with ulcer and inflammation of unspecified lower extremity |
| Hypertension | I87.39  | ICD10 | Chronic venous hypertension (idiopathic) with other complications                                   |
| Hypertension | I87.391 | ICD10 | Chronic venous hypertension with other complications of lower extremity                             |
| Hypertension | I87.392 | ICD10 | Chronic venous hypertension with other complications of lower extremity                             |
| Hypertension | I87.393 | ICD10 | Chronic venous hypertension (idiopathic) with other complications of bilateral lower extremity      |
| Hypertension | I87.399 | ICD10 | Chronic venous hypertension (idiopathic) with other complications of unspecified lower extremity    |
| Hypertension | O10.0   | ICD10 | Pre-existing hypertension complicating pregnancy                                                    |
| Hypertension | O10.0   | ICD10 | Pre-existing essential hypertension complicating pregnancy                                          |
| Hypertension | O10.01  | ICD10 | Pre-existing essential hypertension complicating pregnancy                                          |
| Hypertension | O10.011 | ICD10 | Pre-existing essential hypertension complicating pregnancy                                          |
| Hypertension | O10.012 | ICD10 | Pre-existing essential hypertension complicating pregnancy                                          |
| Hypertension | O10.013 | ICD10 | Pre-existing essential hypertension complicating pregnancy                                          |
| Hypertension | O10.019 | ICD10 | Pre-existing essential hypertension complicating pregnancy                                          |
| Hypertension | O10.02  | ICD10 | Pre-existing essential hypertension complicating childbirth                                         |
| Hypertension | O10.03  | ICD10 | Pre-existing essential hypertension complicating the puerperium                                     |
| Hypertension | O10.1   | ICD10 | Pre-existing hypertensive heart disease complicating pregnancy                                      |
| Hypertension | O10.11  | ICD10 | Pre-existing hypertensive heart disease complicating pregnancy                                      |

|              |         |       |                                                                                   |
|--------------|---------|-------|-----------------------------------------------------------------------------------|
| Hypertension | O10.111 | ICD10 | Pre-existing hypertensive heart disease complicating pregnancy                    |
| Hypertension | O10.112 | ICD10 | Pre-existing hypertensive heart disease complicating pregnancy                    |
| Hypertension | O10.113 | ICD10 | Pre-existing hypertensive heart disease complicating pregnancy                    |
| Hypertension | O10.119 | ICD10 | Pre-existing hypertensive heart disease complicating pregnancy                    |
| Hypertension | O10.12  | ICD10 | Pre-existing hypertensive heart disease complicating childbirth                   |
| Hypertension | O10.13  | ICD10 | Pre-existing hypertensive heart disease complicating the puerperium               |
| Hypertension | O10.2   | ICD10 | Pre-existing hypertensive chronic kidney disease complicating pregnancy           |
| Hypertension | O10.21  | ICD10 | Pre-existing hypertensive chronic kidney disease complicating pregnancy           |
| Hypertension | O10.211 | ICD10 | Pre-existing hypertensive chronic kidney disease complicating pregnancy           |
| Hypertension | O10.212 | ICD10 | Pre-existing hypertensive chronic kidney disease complicating pregnancy           |
| Hypertension | O10.213 | ICD10 | Pre-existing hypertensive chronic kidney disease complicating pregnancy           |
| Hypertension | O10.219 | ICD10 | Pre-existing hypertensive chronic kidney disease complicating pregnancy           |
| Hypertension | O10.22  | ICD10 | Pre-existing hypertensive chronic kidney disease complicating childbirth          |
| Hypertension | O10.23  | ICD10 | Pre-existing hypertensive chronic kidney disease complicating the puerperium      |
| Hypertension | O10.3   | ICD10 | Pre-existing hypertensive heart and chronic kidney disease complicating pregnancy |
| Hypertension | O10.31  | ICD10 | Pre-existing hypertensive heart and chronic kidney disease complicating pregnancy |
| Hypertension | O10.311 | ICD10 | Pre-existing hypertensive heart and chronic kidney disease complicating pregnancy |
| Hypertension | O10.312 | ICD10 | Pre-existing hypertensive heart and chronic kidney disease complicating pregnancy |

|              |         |       |                                                                                        |
|--------------|---------|-------|----------------------------------------------------------------------------------------|
| Hypertension | O10.313 | ICD10 | Pre-existing hypertensive heart and chronic kidney disease complicating pregnancy      |
| Hypertension | O10.319 | ICD10 | Pre-existing hypertensive heart and chronic kidney disease complicating pregnancy      |
| Hypertension | O10.32  | ICD10 | Pre-existing hypertensive heart and chronic kidney disease complicating childbirth     |
| Hypertension | O10.33  | ICD10 | Pre-existing hypertensive heart and chronic kidney disease complicating the puerperium |
| Hypertension | O10.4   | ICD10 | Pre-existing secondary hypertension complicating pregnancy                             |
| Hypertension | O10.41  | ICD10 | Pre-existing secondary hypertension complicating pregnancy                             |
| Hypertension | O10.411 | ICD10 | Pre-existing secondary hypertension complicating pregnancy                             |
| Hypertension | O10.412 | ICD10 | Pre-existing secondary hypertension complicating pregnancy                             |
| Hypertension | O10.413 | ICD10 | Pre-existing secondary hypertension complicating pregnancy                             |
| Hypertension | O10.419 | ICD10 | Pre-existing secondary hypertension complicating pregnancy                             |
| Hypertension | O10.42  | ICD10 | Pre-existing secondary hypertension complicating childbirth                            |
| Hypertension | O10.43  | ICD10 | Pre-existing secondary hypertension complicating the puerperium                        |
| Hypertension | O10.9   | ICD10 | Unspecified pre-existing hypertension complicating pregnancy                           |
| Hypertension | O10.91  | ICD10 | Unspecified pre-existing hypertension complicating pregnancy                           |
| Hypertension | O10.911 | ICD10 | Unspecified pre-existing hypertension complicating pregnancy                           |
| Hypertension | O10.912 | ICD10 | Unspecified pre-existing hypertension complicating pregnancy                           |
| Hypertension | O10.913 | ICD10 | Unspecified pre-existing hypertension complicating pregnancy                           |
| Hypertension | O10.919 | ICD10 | Unspecified pre-existing hypertension complicating pregnancy                           |

|              |        |       |                                                                              |
|--------------|--------|-------|------------------------------------------------------------------------------|
| Hypertension | O10.92 | ICD10 | Unspecified pre-existing hypertension complicating childbirth                |
| Hypertension | O10.93 | ICD10 | Unspecified pre-existing hypertension complicating the puerperium            |
| Hypertension | O13    | ICD10 | Gestational [pregnancy-induced] hypertension without significant proteinuria |
| Hypertension | O13.1  | ICD10 | Gestational [pregnancy-induced] hypertension without significant proteinuria |
| Hypertension | O13.2  | ICD10 | Gestational [pregnancy-induced] hypertension without significant proteinuria |
| Hypertension | O13.3  | ICD10 | Gestational [pregnancy-induced] hypertension without significant proteinuria |
| Hypertension | O13.4  | ICD10 | Gestatnl htn without significant protein                                     |
| Hypertension | O13.5  | ICD10 | Gestatnl htn without significant protein                                     |
| Hypertension | O13.9  | ICD10 | Gestational [pregnancy-induced] hypertension without significant proteinuria |
| Hypertension | O16    | ICD10 | Unspecified maternal hypertension                                            |
| Hypertension | O16.1  | ICD10 | Unspecified maternal hypertension                                            |
| Hypertension | O16.2  | ICD10 | Unspecified maternal hypertension                                            |
| Hypertension | O16.3  | ICD10 | Unspecified maternal hypertension                                            |
| Hypertension | O16.4  | ICD10 | Unspecified maternal hypertension                                            |
| Hypertension | O16.5  | ICD10 | Unspecified maternal hypertension                                            |
| Hypertension | O16.9  | ICD10 | Unspecified maternal hypertension                                            |
| Stroke       | 430    | ICD9  | Subarachnoid hemorrhage                                                      |
| Stroke       | 430    | ICD9  | Subarachnoid hemorrhage **                                                   |
| Stroke       | 431    | ICD9  | Intracerebral hemorrhage                                                     |
| Stroke       | 431    | ICD9  | Intracerebral hemorrhage **                                                  |
| Stroke       | 432    | ICD9  | Other and unspecified intracranial hemorrhage                                |
| Stroke       | 432    | ICD9  | Nontraumatic extradural hemorrhage                                           |
| Stroke       | 432.1  | ICD9  | Subdural hemorrhage                                                          |
| Stroke       | 432.9  | ICD9  | Unspecified intracranial hemorrhage                                          |
| Stroke       | 433    | ICD9  | Occlusion and stenosis of precerebral arteries                               |
| Stroke       | 433    | ICD9  | Occlusion and stenosis of basilar artery                                     |

|        |        |      |                                                                       |
|--------|--------|------|-----------------------------------------------------------------------|
| Stroke | 433    | ICD9 | Occlusion and stenosis of basilar artery                              |
| Stroke | 433.01 | ICD9 | Occlusion and stenosis of basilar artery                              |
| Stroke | 433.1  | ICD9 | Occlusion and stenosis of carotid artery                              |
| Stroke | 433.1  | ICD9 | Occlusion and stenosis of carotid artery                              |
| Stroke | 433.11 | ICD9 | Occlusion and stenosis of carotid artery                              |
| Stroke | 433.2  | ICD9 | Occlusion and stenosis of vertebral artery                            |
| Stroke | 433.2  | ICD9 | Occlusion and stenosis of vertebral artery                            |
| Stroke | 433.21 | ICD9 | Occlusion and stenosis of vertebral artery                            |
| Stroke | 433.3  | ICD9 | Occlusion and stenosis of multiple and bilateral precerebral arteries |
| Stroke | 433.3  | ICD9 | Occlusion and stenosis of multiple and bilateral precerebral arteries |
| Stroke | 433.31 | ICD9 | Occlusion and stenosis of multiple and bilateral precerebral arteries |
| Stroke | 433.8  | ICD9 | Occlusion and stenosis of other specified precerebral artery          |
| Stroke | 433.8  | ICD9 | Occlusion and stenosis of other specified precerebral artery          |
| Stroke | 433.81 | ICD9 | Occlusion and stenosis of other specified precerebral artery          |
| Stroke | 433.9  | ICD9 | Occlusion and stenosis of unspecified precerebral artery              |
| Stroke | 433.9  | ICD9 | Occlusion and stenosis of unspecified precerebral artery              |
| Stroke | 433.91 | ICD9 | Unspecified precerebral artery                                        |
| Stroke | 434    | ICD9 | Occlusion of cerebral arteries                                        |
| Stroke | 434    | ICD9 | Cerebral thrombosis                                                   |
| Stroke | 434    | ICD9 | Cerebral thrombosis                                                   |
| Stroke | 434.01 | ICD9 | Cerebral thrombosis                                                   |
| Stroke | 434.1  | ICD9 | Cerebral embolism                                                     |
| Stroke | 434.1  | ICD9 | Cerebral embolism                                                     |
| Stroke | 434.11 | ICD9 | Cerebral embolism                                                     |
| Stroke | 434.9  | ICD9 | Cerebral artery occlusion                                             |
| Stroke | 434.9  | ICD9 | Cerebral artery occlusion                                             |
| Stroke | 434.91 | ICD9 | Cerebral artery occlusion                                             |
| Stroke | 437.1  | ICD9 | Other generalized ischemic cerebrovascular disease                    |

|        |         |       |                                                                       |
|--------|---------|-------|-----------------------------------------------------------------------|
| Stroke | I63     | ICD10 | Cerebral infarction                                                   |
| Stroke | I63.6   | ICD10 | Cerebral infarction due to cerebral venous thrombosis                 |
| Stroke | I63.42  | ICD10 | Cerebral infarction due to embolism of anterior cerebral artery       |
| Stroke | I63.12  | ICD10 | Cerebral infarction due to embolism of basilar artery                 |
| Stroke | I63.113 | ICD10 | Cerebral infarction due to embolism of bilateral vertebral arteries   |
| Stroke | I63.13  | ICD10 | Cerebral infarction due to embolism of carotid artery                 |
| Stroke | I63.44  | ICD10 | Cerebral infarction due to embolism of cerebellar artery              |
| Stroke | I63.4   | ICD10 | Cerebral infarction due to embolism of cerebral arteries              |
| Stroke | I63.422 | ICD10 | Cerebral infarction due to embolism of left anterior cerebral artery  |
| Stroke | I63.132 | ICD10 | Cerebral infarction due to embolism of left carotid artery            |
| Stroke | I63.442 | ICD10 | Cerebral infarction due to embolism of left cerebellar artery         |
| Stroke | I63.412 | ICD10 | Cerebral infarction due to embolism of left middle cerebral artery    |
| Stroke | I63.432 | ICD10 | Cerebral infarction due to embolism of left posterior cerebral artery |
| Stroke | I63.112 | ICD10 | Cerebral infarction due to embolism of left vertebral artery          |
| Stroke | I63.41  | ICD10 | Cerebral infarction due to embolism of middle cerebral artery         |
| Stroke | I63.49  | ICD10 | Cerebral infarction due to embolism of other cerebral artery          |
| Stroke | I63.19  | ICD10 | Cerebral infarction due to embolism of other precerebral artery       |
| Stroke | I63.43  | ICD10 | Cerebral infarction due to embolism of posterior cerebral artery      |
| Stroke | I63.1   | ICD10 | Cerebral infarction due to embolism of precerebral arteries           |
| Stroke | I63.421 | ICD10 | Cerebral infarction due to embolism of right anterior cerebral artery |

|        |         |       |                                                                              |
|--------|---------|-------|------------------------------------------------------------------------------|
| Stroke | I63.131 | ICD10 | Cerebral infarction due to embolism of right carotid artery                  |
| Stroke | I63.441 | ICD10 | Cerebral infarction due to embolism of right cerebellar artery               |
| Stroke | I63.411 | ICD10 | Cerebral infarction due to embolism of right middle cerebral artery          |
| Stroke | I63.431 | ICD10 | Cerebral infarction due to embolism of right posterior cerebral artery       |
| Stroke | I63.111 | ICD10 | Cerebral infarction due to embolism of right vertebral artery                |
| Stroke | I63.429 | ICD10 | Cerebral infarction due to embolism of unspecified anterior cerebral artery  |
| Stroke | I63.139 | ICD10 | Cerebral infarction due to embolism of unspecified carotid artery            |
| Stroke | I63.449 | ICD10 | Cerebral infarction due to embolism of unspecified cerebellar artery         |
| Stroke | I63.40  | ICD10 | Cerebral infarction due to embolism of unspecified cerebral artery           |
| Stroke | I63.419 | ICD10 | Cerebral infarction due to embolism of unspecified middle cerebral artery    |
| Stroke | I63.439 | ICD10 | Cerebral infarction due to embolism of unspecified posterior cerebral artery |
| Stroke | I63.10  | ICD10 | Cerebral infarction due to embolism of unspecified precerebral artery        |
| Stroke | I63.119 | ICD10 | Cerebral infarction due to embolism of unspecified vertebral artery          |
| Stroke | I63.11  | ICD10 | Cerebral infarction due to embolism of vertebral artery                      |
| Stroke | I63.32  | ICD10 | Cerebral infarction due to thrombosis of anterior cerebral artery            |
| Stroke | I63.02  | ICD10 | Cerebral infarction due to thrombosis of basilar artery                      |
| Stroke | I63.03  | ICD10 | Cerebral infarction due to thrombosis of carotid artery                      |
| Stroke | I63.34  | ICD10 | Cerebral infarction due to thrombosis of cerebellar artery                   |
| Stroke | I63.3   | ICD10 | Cerebral infarction due to thrombosis of cerebral arteries                   |
| Stroke | I63.322 | ICD10 | Cerebral infarction due to thrombosis of left anterior cerebral artery       |

|        |         |       |                                                                               |
|--------|---------|-------|-------------------------------------------------------------------------------|
| Stroke | I63.032 | ICD10 | Cerebral infarction due to thrombosis of left carotid artery                  |
| Stroke | I63.342 | ICD10 | Cerebral infarction due to thrombosis of left cerebellar artery               |
| Stroke | I63.312 | ICD10 | Cerebral infarction due to thrombosis of left middle cerebral artery          |
| Stroke | I63.332 | ICD10 | Cerebral infarction due to thrombosis of left posterior cerebral artery       |
| Stroke | I63.012 | ICD10 | Cerebral infarction due to thrombosis of left vertebral artery                |
| Stroke | I63.31  | ICD10 | Cerebral infarction due to thrombosis of middle cerebral artery               |
| Stroke | I63.39  | ICD10 | Cerebral infarction due to thrombosis of other cerebral artery                |
| Stroke | I63.09  | ICD10 | Cerebral infarction due to thrombosis of other precerebral artery             |
| Stroke | I63.33  | ICD10 | Cerebral infarction due to thrombosis of posterior cerebral artery            |
| Stroke | I63.0   | ICD10 | Cerebral infarction due to thrombosis of precerebral arteries                 |
| Stroke | I63.321 | ICD10 | Cerebral infarction due to thrombosis of right anterior cerebral artery       |
| Stroke | I63.031 | ICD10 | Cerebral infarction due to thrombosis of right carotid artery                 |
| Stroke | I63.341 | ICD10 | Cerebral infarction due to thrombosis of right cerebellar artery              |
| Stroke | I63.311 | ICD10 | Cerebral infarction due to thrombosis of right middle cerebral artery         |
| Stroke | I63.331 | ICD10 | Cerebral infarction due to thrombosis of right posterior cerebral artery      |
| Stroke | I63.011 | ICD10 | Cerebral infarction due to thrombosis of right vertebral artery               |
| Stroke | I63.329 | ICD10 | Cerebral infarction due to thrombosis of unspecified anterior cerebral artery |
| Stroke | I63.039 | ICD10 | Cerebral infarction due to thrombosis of unspecified carotid artery           |
| Stroke | I63.349 | ICD10 | Cerebral infarction due to thrombosis of unspecified cerebellar artery        |
| Stroke | I63.30  | ICD10 | Cerebral infarction due to thrombosis of unspecified cerebral artery          |



|        |         |       |                                                                                                       |
|--------|---------|-------|-------------------------------------------------------------------------------------------------------|
| Stroke | I63.319 | ICD10 | Cerebral infarction due to thrombosis of unspecified middle cerebral artery                           |
| Stroke | I63.339 | ICD10 | Cerebral infarction due to thrombosis of unspecified posterior cerebral artery                        |
| Stroke | I63.00  | ICD10 | Cerebral infarction due to thrombosis of unspecified precerebral artery                               |
| Stroke | I63.019 | ICD10 | Cerebral infarction due to thrombosis of unspecified vertebral artery                                 |
| Stroke | I63.01  | ICD10 | Cerebral infarction due to thrombosis of vertebral artery                                             |
| Stroke | I63.52  | ICD10 | Cerebral infarction due to unspecified occlusion or stenosis of anterior cerebral artery              |
| Stroke | I63.22  | ICD10 | Cerebral infarction due to unspecified occlusion or stenosis of basilar arteries                      |
| Stroke | I63.523 | ICD10 | Cerebral infarction due to unspecified occlusion or stenosis of bilateral anterior cerebral arteries  |
| Stroke | I63.233 | ICD10 | Cerebral infarction due to unspecified occlusion or stenosis of bilateral carotid arteries            |
| Stroke | I63.543 | ICD10 | Cerebral infarction due to unspecified occlusion or stenosis of bilateral cerebellar arteries         |
| Stroke | I63.513 | ICD10 | Cerebral infarction due to unspecified occlusion or stenosis of bilateral middle cerebral arteries    |
| Stroke | I63.533 | ICD10 | Cerebral infarction due to unspecified occlusion or stenosis of bilateral posterior cerebral arteries |
| Stroke | I63.213 | ICD10 | Cerebral infarction due to unspecified occlusion or stenosis of bilateral vertebral arteries          |
| Stroke | I63.23  | ICD10 | Cerebral infarction due to unspecified occlusion or stenosis of carotid arteries                      |
| Stroke | I63.54  | ICD10 | Cerebral infarction due to unspecified occlusion or stenosis of cerebellar artery                     |
| Stroke | I63.5   | ICD10 | Cerebral infarction due to unspecified occlusion or stenosis of cerebral arteries                     |

|        |         |       |                                                                                                |
|--------|---------|-------|------------------------------------------------------------------------------------------------|
| Stroke | I63.522 | ICD10 | Cerebral infarction due to unspecified occlusion or stenosis of left anterior cerebral artery  |
| Stroke | I63.232 | ICD10 | Cerebral infarction due to unspecified occlusion or stenosis of left carotid arteries          |
| Stroke | I63.542 | ICD10 | Cerebral infarction due to unspecified occlusion or stenosis of left cerebellar artery         |
| Stroke | I63.512 | ICD10 | Cerebral infarction due to unspecified occlusion or stenosis of left middle cerebral artery    |
| Stroke | I63.532 | ICD10 | Cerebral infarction due to unspecified occlusion or stenosis of left posterior cerebral artery |
| Stroke | I63.212 | ICD10 | Cerebral infarction due to unspecified occlusion or stenosis of left vertebral arteries        |
| Stroke | I63.51  | ICD10 | Cerebral infarction due to unspecified occlusion or stenosis of middle cerebral artery         |
| Stroke | I63.59  | ICD10 | Cerebral infarction due to unspecified occlusion or stenosis of other cerebral artery          |
| Stroke | I63.29  | ICD10 | Cerebral infarction due to unspecified occlusion or stenosis of other precerebral arteries     |
| Stroke | I63.53  | ICD10 | Cerebral infarction due to unspecified occlusion or stenosis of posterior cerebral artery      |
| Stroke | I63.2   | ICD10 | Cerebral infarction due to unspecified occlusion or stenosis of precerebral arteries           |
| Stroke | I63.521 | ICD10 | Cerebral infarction due to unspecified occlusion or stenosis of right anterior cerebral artery |
| Stroke | I63.231 | ICD10 | Cerebral infarction due to unspecified occlusion or stenosis of right carotid arteries         |

|        |         |       |                                                                                                       |
|--------|---------|-------|-------------------------------------------------------------------------------------------------------|
| Stroke | I63.541 | ICD10 | Cerebral infarction due to unspecified occlusion or stenosis of right cerebellar artery               |
| Stroke | I63.511 | ICD10 | Cerebral infarction due to unspecified occlusion or stenosis of right middle cerebral artery          |
| Stroke | I63.531 | ICD10 | Cerebral infarction due to unspecified occlusion or stenosis of right posterior cerebral artery       |
| Stroke | I63.211 | ICD10 | Cerebral infarction due to unspecified occlusion or stenosis of right vertebral arteries              |
| Stroke | I63.529 | ICD10 | Cerebral infarction due to unspecified occlusion or stenosis of unspecified anterior cerebral artery  |
| Stroke | I63.239 | ICD10 | Cerebral infarction due to unspecified occlusion or stenosis of unspecified carotid arteries          |
| Stroke | I63.549 | ICD10 | Cerebral infarction due to unspecified occlusion or stenosis of unspecified cerebellar artery         |
| Stroke | I63.50  | ICD10 | Cerebral infarction due to unspecified occlusion or stenosis of unspecified cerebral artery           |
| Stroke | I63.519 | ICD10 | Cerebral infarction due to unspecified occlusion or stenosis of unspecified middle cerebral artery    |
| Stroke | I63.539 | ICD10 | Cerebral infarction due to unspecified occlusion or stenosis of unspecified posterior cerebral artery |
| Stroke | I63.20  | ICD10 | Cerebral infarction due to unspecified occlusion or stenosis of unspecified precerebral arteries      |
| Stroke | I63.219 | ICD10 | Cerebral infarction due to unspecified occlusion or stenosis of unspecified vertebral arteries        |
| Stroke | I63.21  | ICD10 | Cerebral infarction due to unspecified occlusion or stenosis of vertebral arteries                    |
| Stroke | I63.9   | ICD10 | Cerebral infarction                                                                                   |
| Stroke | I63.423 | ICD10 | Cerebral infrc due to embolism of bi ant cerebral arteries                                            |

|        |         |       |                                                              |
|--------|---------|-------|--------------------------------------------------------------|
| Stroke | I63.413 | ICD10 | Cerebral infrc due to embolism of bi middle cerebral art     |
| Stroke | I63.433 | ICD10 | Cerebral infrc due to embolism of bi post cerebral arteries  |
| Stroke | I63.133 | ICD10 | Cerebral infrc due to embolism of bilateral carotid arteries |
| Stroke | I63.443 | ICD10 | Cerebral infrc due to embolism of bilateral cereblr arteries |
| Stroke | I63.323 | ICD10 | Cerebral infrc due to thombos of bi ant cerebral arteries    |
| Stroke | I63.313 | ICD10 | Cerebral infrc due to thombos of bi middle cerebral arteries |
| Stroke | I63.333 | ICD10 | Cerebral infrc to thombos of bi posterior cerebral arteries  |
| Stroke | I63.343 | ICD10 | Cerebral infrc to thrombosis of bilateral cereblr arteries   |
| Stroke | I63.8   | ICD10 | Other cerebral infarction                                    |
| Stroke | I61     | ICD10 | Nontraumatic intracerebral hemorrhage                        |
| Stroke | I61.3   | ICD10 | Nontraumatic intracerebral hemorrhage in brain stem          |
| Stroke | I61.4   | ICD10 | Nontraumatic intracerebral hemorrhage in cerebellum          |
| Stroke | I61.1   | ICD10 | Nontraumatic intracerebral hemorrhage in hemisphere          |
| Stroke | I61.0   | ICD10 | Nontraumatic intracerebral hemorrhage in hemisphere          |
| Stroke | I61.2   | ICD10 | Nontraumatic intracerebral hemorrhage in hemisphere          |
| Stroke | I61.5   | ICD10 | Nontraumatic intracerebral hemorrhage                        |
| Stroke | I61.6   | ICD10 | Nontraumatic intracerebral hemorrhage                        |
| Stroke | I61.9   | ICD10 | Nontraumatic intracerebral hemorrhage                        |
| Stroke | I61.8   | ICD10 | Other nontraumatic intracerebral hemorrhage                  |
| Stroke | I67.81  | ICD10 | Acute cerebrovascular insufficiency                          |

**STROBE 2007 (v4) checklist of items to be included in reports of observational studies in epidemiology\***  
**Checklist for cohort, case-control, and cross-sectional studies (combined)**

| Section/Topic             | Item # | Recommendation                                                                                                                                                                                                                                                                                                                                                                                                                                                         | Reported on page # |
|---------------------------|--------|------------------------------------------------------------------------------------------------------------------------------------------------------------------------------------------------------------------------------------------------------------------------------------------------------------------------------------------------------------------------------------------------------------------------------------------------------------------------|--------------------|
| Title and abstract        | 1      | (a) Indicate the study's design with a commonly used term in the title or the abstract                                                                                                                                                                                                                                                                                                                                                                                 | 1                  |
|                           |        | (b) Provide in the abstract an informative and balanced summary of what was done and what was found                                                                                                                                                                                                                                                                                                                                                                    | 3                  |
| <b>Introduction</b>       |        |                                                                                                                                                                                                                                                                                                                                                                                                                                                                        |                    |
| Background/rationale      | 2      | Explain the scientific background and rationale for the investigation being reported                                                                                                                                                                                                                                                                                                                                                                                   | 3                  |
| Objectives                | 3      | State specific objectives, including any pre-specified hypotheses                                                                                                                                                                                                                                                                                                                                                                                                      | 3                  |
| <b>Methods</b>            |        |                                                                                                                                                                                                                                                                                                                                                                                                                                                                        |                    |
| Study design              | 4      | Present key elements of study design early in the paper                                                                                                                                                                                                                                                                                                                                                                                                                | 4                  |
| Setting                   | 5      | Describe the setting, locations, and relevant dates, including periods of recruitment, exposure, follow-up, and data collection                                                                                                                                                                                                                                                                                                                                        | 4                  |
| Participants              | 6      | (a) <i>Cohort study</i> —Give the eligibility criteria, and the sources and methods of selection of participants. Describe methods of follow-up<br><i>Case-control study</i> —Give the eligibility criteria, and the sources and methods of case ascertainment and control selection. Give the rationale for the choice of cases and controls<br><i>Cross-sectional study</i> —Give the eligibility criteria, and the sources and methods of selection of participants | 4                  |
|                           |        | (b) <i>Cohort study</i> —For matched studies, give matching criteria and number of exposed and unexposed<br><i>Case-control study</i> —For matched studies, give matching criteria and the number of controls per case                                                                                                                                                                                                                                                 | 4                  |
| Variables                 | 7      | Clearly define all outcomes, exposures, predictors, potential confounders, and effect modifiers. Give diagnostic criteria, if applicable                                                                                                                                                                                                                                                                                                                               | 5                  |
| Data sources/ measurement | 8*     | For each variable of interest, give sources of data and details of methods of assessment (measurement). Describe comparability of assessment methods if there is more than one group                                                                                                                                                                                                                                                                                   | 4                  |
| Bias                      | 9      | Describe any efforts to address potential sources of bias                                                                                                                                                                                                                                                                                                                                                                                                              | 4                  |
| Study size                | 10     | Explain how the study size was arrived at                                                                                                                                                                                                                                                                                                                                                                                                                              | 4                  |
| Quantitative variables    | 11     | Explain how quantitative variables were handled in the analyses. If applicable, describe which groupings were chosen and why                                                                                                                                                                                                                                                                                                                                           | 4                  |
| Statistical methods       | 12     | (a) Describe all statistical methods, including those used to control for confounding                                                                                                                                                                                                                                                                                                                                                                                  | 4                  |
|                           |        | (b) Describe any methods used to examine subgroups and interactions                                                                                                                                                                                                                                                                                                                                                                                                    | 5                  |
|                           |        | (c) Explain how missing data were addressed                                                                                                                                                                                                                                                                                                                                                                                                                            | NA                 |
|                           |        | (d) <i>Cohort study</i> —If applicable, explain how loss to follow-up was addressed<br><i>Case-control study</i> —If applicable, explain how matching of cases and controls was addressed                                                                                                                                                                                                                                                                              | NA                 |

|                          |     |                                                                                                                                                                                                              |       |
|--------------------------|-----|--------------------------------------------------------------------------------------------------------------------------------------------------------------------------------------------------------------|-------|
|                          |     | <i>Cross-sectional study</i> —If applicable, describe analytical methods taking account of sampling strategy                                                                                                 |       |
|                          |     | (e) Describe any sensitivity analyses                                                                                                                                                                        | NA    |
| <b>Results</b>           |     |                                                                                                                                                                                                              |       |
| Participants             | 13* | (a) Report numbers of individuals at each stage of study—eg numbers potentially eligible, examined for eligibility, confirmed eligible, included in the study, completing follow-up, and analysed            | 5     |
|                          |     | (b) Give reasons for non-participation at each stage                                                                                                                                                         | NA    |
|                          |     | (c) Consider use of a flow diagram                                                                                                                                                                           | NA    |
| Descriptive data         | 14* | (a) Give characteristics of study participants (eg demographic, clinical, social) and information on exposures and potential confounders                                                                     | 5     |
|                          |     | (b) Indicate number of participants with missing data for each variable of interest                                                                                                                          | 5     |
|                          |     | (c) <i>Cohort study</i> —Summarise follow-up time (eg, average and total amount)                                                                                                                             | 5     |
| Outcome data             | 15* | <i>Cohort study</i> —Report numbers of outcome events or summary measures over time                                                                                                                          |       |
|                          |     | <i>Case-control study</i> —Report numbers in each exposure category, or summary measures of exposure                                                                                                         | 5     |
|                          |     | <i>Cross-sectional study</i> —Report numbers of outcome events or summary measures                                                                                                                           |       |
| Main results             | 16  | (a) Give unadjusted estimates and, if applicable, confounder-adjusted estimates and their precision (eg, 95% confidence interval). Make clear which confounders were adjusted for and why they were included | 10-19 |
|                          |     | (b) Report category boundaries when continuous variables were categorized                                                                                                                                    | 10-19 |
|                          |     | (c) If relevant, consider translating estimates of relative risk into absolute risk for a meaningful time period                                                                                             | NA    |
| Other analyses           | 17  | Report other analyses done—eg analyses of subgroups and interactions, and sensitivity analyses                                                                                                               | NA    |
| <b>Discussion</b>        |     |                                                                                                                                                                                                              |       |
| Key results              | 18  | Summarise key results with reference to study objectives                                                                                                                                                     | 7-9   |
| Limitations              | 19  | Discuss limitations of the study, taking into account sources of potential bias or imprecision. Discuss both direction and magnitude of any potential bias                                                   | 8-9   |
| Interpretation           | 20  | Give a cautious overall interpretation of results considering objectives, limitations, multiplicity of analyses, results from similar studies, and other relevant evidence                                   | 9     |
| Generalisability         | 21  | Discuss the generalisability (external validity) of the study results                                                                                                                                        | 9     |
| <b>Other information</b> |     |                                                                                                                                                                                                              |       |
| Funding                  | 22  | Give the source of funding and the role of the funders for the present study and, if applicable, for the original study on which the present article is based                                                | 2     |

\*Give information separately for cases and controls in case-control studies and, if applicable, for exposed and unexposed groups in cohort and cross-sectional studies.

**Note:** An Explanation and Elaboration article discusses each checklist item and gives methodological background and published examples of transparent reporting. The STROBE checklist is best used in conjunction with this article (freely available on the Web sites of PLoS Medicine at <http://www.plosmedicine.org/>, Annals of Internal Medicine at <http://www.annals.org/>, and Epidemiology at <http://www.epidem.com/>). Information on the STROBE Initiative is available at [www.strobe-statement.org](http://www.strobe-statement.org).

# BMJ Open

## Retrospective Cohort Study of Clinical Characteristics of 2,199 Hospitalized COVID-19 Patients in New York City

|                               |                                                                                                                                                                                                                                                                                                                                                                                                                                                                                                                                                                                                                                                                                                                                                                                                                                                                                                                                                                                                                                                                                                                                                                                                                                                                                                                                                                                                                                                                                                                                                                                                                                                                                                                                                                                                                                                                                                                                                                                                                                                                                                                                                                                                                                                                                                                                                                                                                                                                                                                                                                                                                                                                                                                                                                                                                                     |
|-------------------------------|-------------------------------------------------------------------------------------------------------------------------------------------------------------------------------------------------------------------------------------------------------------------------------------------------------------------------------------------------------------------------------------------------------------------------------------------------------------------------------------------------------------------------------------------------------------------------------------------------------------------------------------------------------------------------------------------------------------------------------------------------------------------------------------------------------------------------------------------------------------------------------------------------------------------------------------------------------------------------------------------------------------------------------------------------------------------------------------------------------------------------------------------------------------------------------------------------------------------------------------------------------------------------------------------------------------------------------------------------------------------------------------------------------------------------------------------------------------------------------------------------------------------------------------------------------------------------------------------------------------------------------------------------------------------------------------------------------------------------------------------------------------------------------------------------------------------------------------------------------------------------------------------------------------------------------------------------------------------------------------------------------------------------------------------------------------------------------------------------------------------------------------------------------------------------------------------------------------------------------------------------------------------------------------------------------------------------------------------------------------------------------------------------------------------------------------------------------------------------------------------------------------------------------------------------------------------------------------------------------------------------------------------------------------------------------------------------------------------------------------------------------------------------------------------------------------------------------------|
| Journal:                      | <i>BMJ Open</i>                                                                                                                                                                                                                                                                                                                                                                                                                                                                                                                                                                                                                                                                                                                                                                                                                                                                                                                                                                                                                                                                                                                                                                                                                                                                                                                                                                                                                                                                                                                                                                                                                                                                                                                                                                                                                                                                                                                                                                                                                                                                                                                                                                                                                                                                                                                                                                                                                                                                                                                                                                                                                                                                                                                                                                                                                     |
| Manuscript ID                 | bmjopen-2020-040736.R2                                                                                                                                                                                                                                                                                                                                                                                                                                                                                                                                                                                                                                                                                                                                                                                                                                                                                                                                                                                                                                                                                                                                                                                                                                                                                                                                                                                                                                                                                                                                                                                                                                                                                                                                                                                                                                                                                                                                                                                                                                                                                                                                                                                                                                                                                                                                                                                                                                                                                                                                                                                                                                                                                                                                                                                                              |
| Article Type:                 | Original research                                                                                                                                                                                                                                                                                                                                                                                                                                                                                                                                                                                                                                                                                                                                                                                                                                                                                                                                                                                                                                                                                                                                                                                                                                                                                                                                                                                                                                                                                                                                                                                                                                                                                                                                                                                                                                                                                                                                                                                                                                                                                                                                                                                                                                                                                                                                                                                                                                                                                                                                                                                                                                                                                                                                                                                                                   |
| Date Submitted by the Author: | 24-Oct-2020                                                                                                                                                                                                                                                                                                                                                                                                                                                                                                                                                                                                                                                                                                                                                                                                                                                                                                                                                                                                                                                                                                                                                                                                                                                                                                                                                                                                                                                                                                                                                                                                                                                                                                                                                                                                                                                                                                                                                                                                                                                                                                                                                                                                                                                                                                                                                                                                                                                                                                                                                                                                                                                                                                                                                                                                                         |
| Complete List of Authors:     | <p>Paranjpe, Ishan; Icahn School of Medicine at Mount Sinai, The Hasso Plattner Institute for Digital Health at Mount Sinai<br/> Russak, Adam; Icahn School of Medicine at Mount Sinai, The Hasso Plattner Institute for Digital Health at Mount Sinai; Icahn School of Medicine at Mount Sinai, Department of Internal Medicine<br/> De Freitas , Jessica; Icahn School of Medicine at Mount Sinai, The Hasso Plattner Institute for Digital Health at Mount Sinai; Icahn School of Medicine at Mount Sinai Department of Genetics and Genomic Sciences<br/> Lala, Anuradha; Icahn School of Medicine at Mount Sinai, The Zena and Michael A. Wiener Cardiovascular Institute; Icahn School of Medicine at Mount Sinai, Department of Population Health Science and Policy<br/> Miotto, Riccardo; Icahn School of Medicine at Mount Sinai, The Hasso Plattner Institute for Digital Health at Mount Sinai; Icahn School of Medicine at Mount Sinai Department of Genetics and Genomic Sciences<br/> Vaid, Akhil; Icahn School of Medicine at Mount Sinai, The Hasso Plattner Institute for Digital Health at Mount Sinai; Icahn School of Medicine at Mount Sinai Department of Genetics and Genomic Sciences<br/> Johnson, Kipp; Icahn School of Medicine at Mount Sinai, The Hasso Plattner Institute for Digital Health at Mount Sinai; Icahn School of Medicine at Mount Sinai Department of Genetics and Genomic Sciences<br/> Danieletto, Matteo; Icahn School of Medicine at Mount Sinai, The Hasso Plattner Institute for Digital Health at Mount Sinai; Icahn School of Medicine at Mount Sinai Department of Genetics and Genomic Sciences<br/> Golden, Eddy; Icahn School of Medicine at Mount Sinai, The Hasso Plattner Institute for Digital Health at Mount Sinai; Icahn School of Medicine at Mount Sinai Department of Genetics and Genomic Sciences<br/> Meyer, Dara; Icahn School of Medicine at Mount Sinai Department of Genetics and Genomic Sciences<br/> Singh, Manbir; Icahn School of Medicine at Mount Sinai, The Hasso Plattner Institute for Digital Health at Mount Sinai<br/> Somani, Sulaiman ; Icahn School of Medicine at Mount Sinai, The Hasso Plattner Institute for Digital Health at Mount Sinai<br/> Kapoor, Arjun; Icahn School of Medicine at Mount Sinai, The Hasso Plattner Institute for Digital Health at Mount Sinai<br/> O'Hagan, Ross; Icahn School of Medicine at Mount Sinai, The Hasso Plattner Institute for Digital Health at Mount Sinai<br/> Manna, Sayan; Icahn School of Medicine at Mount Sinai, The Hasso Plattner Institute for Digital Health at Mount Sinai<br/> Nangia, Udit; Icahn School of Medicine at Mount Sinai, The Hasso Plattner Institute for Digital Health at Mount Sinai<br/> Jaladanki, Suraj; Icahn School of Medicine at Mount Sinai, The Hasso</p> |

|    |                                                                           |
|----|---------------------------------------------------------------------------|
| 1  |                                                                           |
| 2  |                                                                           |
| 3  |                                                                           |
| 4  | Plattner Institute for Digital Health at Mount Sinai                      |
| 5  | O'Reilly, Paul; Icahn School of Medicine at Mount Sinai Department of     |
| 6  | Genetics and Genomic Sciences; Icahn School of Medicine at Mount          |
| 7  | Sinai, The Pamela Sklar Division of Psychiatric Genomics                  |
| 8  | Huckins, Laura; Icahn School of Medicine at Mount Sinai Department of     |
| 9  | Genetics and Genomic Sciences; Icahn School of Medicine at Mount          |
| 10 | Sinai, The Pamela Sklar Division of Psychiatric Genomics                  |
| 11 | Glowe, Patricia; Icahn School of Medicine at Mount Sinai, The Hasso       |
| 12 | Plattner Institute for Digital Health at Mount Sinai; Icahn School of     |
| 13 | Medicine at Mount Sinai Department of Genetics and Genomic Sciences       |
| 14 | Kia, Arash; Icahn School of Medicine at Mount Sinai, Department of        |
| 15 | Population Health Science and Policy; Icahn School of Medicine at Mount   |
| 16 | Sinai, Institute for Healthcare Delivery Science                          |
| 17 | Timsina, Prem; Icahn School of Medicine at Mount Sinai, Department of     |
| 18 | Population Health Science and Policy; Icahn School of Medicine at Mount   |
| 19 | Sinai, Institute for Healthcare Delivery Science                          |
| 20 | Freeman, Robert; Icahn School of Medicine at Mount Sinai, Department      |
| 21 | of Population Health Science and Policy; Icahn School of Medicine at      |
| 22 | Mount Sinai, Institute for Healthcare Delivery Science                    |
| 23 | Levin, Matthew; Icahn School of Medicine at Mount Sinai Department of     |
| 24 | Genetics and Genomic Sciences; Icahn School of Medicine at Mount          |
| 25 | Sinai, Icahn Institute for Data Science and Genomic Technology,           |
| 26 | Jhang, Jeffrey; Icahn School of Medicine at Mount Sinai, Department of    |
| 27 | Pathology, Molecular and Cell-Based Medicine                              |
| 28 | Firpo, Adolfo; Icahn School of Medicine at Mount Sinai, Department of     |
| 29 | Pathology, Molecular and Cell-Based Medicine                              |
| 30 | Kovatch, Patricia; Icahn School of Medicine at Mount Sinai; Mount Sinai   |
| 31 | Health System, Mount Sinai Data Warehouse                                 |
| 32 | Finkelstein, Joseph; Icahn School of Medicine at Mount Sinai,             |
| 33 | Department of Population Health Science and Policy                        |
| 34 | Aberg, Judith; Icahn School of Medicine at Mount Sinai, Division of       |
| 35 | Infectious Diseases; Icahn School of Medicine at Mount Sinai Department   |
| 36 | of Medicine                                                               |
| 37 | Bagiella, Emilia; Icahn School of Medicine at Mount Sinai, The Zena and   |
| 38 | Michael A. Wiener Cardiovascular Institute; Icahn School of Medicine at   |
| 39 | Mount Sinai, Department of Population Health Science and Policy           |
| 40 | Horowitz, Carol; Icahn School of Medicine at Mount Sinai, Department of   |
| 41 | Population Health Science and Policy; Icahn School of Medicine at Mount   |
| 42 | Sinai Department of Medicine                                              |
| 43 | Murphy, Barbara; Icahn School of Medicine at Mount Sinai Department of    |
| 44 | Medicine                                                                  |
| 45 | Fayad, Zahi; Icahn School of Medicine at Mount Sinai BioMedical           |
| 46 | Engineering and Imaging Institute; Icahn School of Medicine at Mount      |
| 47 | Sinai, Department of Radiology                                            |
| 48 | Narula, Jagat; Icahn School of Medicine at Mount Sinai Department of      |
| 49 | Medicine; Icahn School of Medicine at Mount Sinai, Department of          |
| 50 | Cardiology                                                                |
| 51 | Nestler, Eric; Icahn School of Medicine at Mount Sinai Friedman Brain     |
| 52 | Institute; Icahn School of Medicine at Mount Sinai, The Nash Family       |
| 53 | Department of Neuroscience                                                |
| 54 | Fuster, V; Zena and Michael A. Wiener Cardiovascular Institute and        |
| 55 | Marie-Josée and Henry R. Kravis Center for Cardiovascular Health, Icahn   |
| 56 | School of Medicine at Mount Sinai, New York, NY, USA, Department of       |
| 57 | Medicine, Division of Cardiology                                          |
| 58 | Cordon-Cardo, Carlos; Icahn School of Medicine at Mount Sinai,            |
| 59 | Department of Pathology, Molecular and Cell-Based Medicine                |
| 60 | Charney, Dennis ; Icahn School of Medicine at Mount Sinai Department      |
|    | of Psychiatry; Icahn School of Medicine at Mount Sinai, The Office of the |
|    | Dean                                                                      |
|    | Reich, David; Icahn School of Medicine at Mount Sinai Department of       |
|    | Anesthesiology Perioperative and Pain Medicine                            |



|                                 |                                                                                                                                                                                                                                                                                                                                                                                                                                                                                                                                                                                                                                                                                                                                                                                                                                                                                                                                                                            |
|---------------------------------|----------------------------------------------------------------------------------------------------------------------------------------------------------------------------------------------------------------------------------------------------------------------------------------------------------------------------------------------------------------------------------------------------------------------------------------------------------------------------------------------------------------------------------------------------------------------------------------------------------------------------------------------------------------------------------------------------------------------------------------------------------------------------------------------------------------------------------------------------------------------------------------------------------------------------------------------------------------------------|
|                                 | Just, Allan; Icahn School of Medicine at Mount Sinai Department of Environmental Medicine and Public Health; Icahn School of Medicine at Mount Sinai, Institute for Exposomic Research<br>Bottinger, Erwin; Icahn School of Medicine at Mount Sinai, The Hasso Plattner Institute for Digital Health at Mount Sinai<br>Charney, Alexander; Icahn School of Medicine at Mount Sinai Department of Genetics and Genomic Sciences; Icahn School of Medicine at Mount Sinai, The Pamela Sklar Division of Psychiatric Genomics<br>Glicksberg, Benjamin; Icahn School of Medicine at Mount Sinai Department of Genetics and Genomic Sciences, Genetics and Genomics Sciences; Icahn School of Medicine at Mount Sinai, The Hasso Plattner Institute for Digital Health at Mount Sinai<br>Nadkarni, GN ; Icahn School of Medicine at Mount Sinai, The Hasso Plattner Institute for Digital Health at Mount Sinai; Icahn School of Medicine at Mount Sinai Department of Medicine |
| <b>Primary Subject Heading</b>: | Infectious diseases                                                                                                                                                                                                                                                                                                                                                                                                                                                                                                                                                                                                                                                                                                                                                                                                                                                                                                                                                        |
| Secondary Subject Heading:      | Infectious diseases                                                                                                                                                                                                                                                                                                                                                                                                                                                                                                                                                                                                                                                                                                                                                                                                                                                                                                                                                        |
| Keywords:                       | INFECTIOUS DISEASES, Public health < INFECTIOUS DISEASES, INTERNAL MEDICINE                                                                                                                                                                                                                                                                                                                                                                                                                                                                                                                                                                                                                                                                                                                                                                                                                                                                                                |
|                                 |                                                                                                                                                                                                                                                                                                                                                                                                                                                                                                                                                                                                                                                                                                                                                                                                                                                                                                                                                                            |

SCHOLARONE™  
Manuscripts



I, the Submitting Author has the right to grant and does grant on behalf of all authors of the Work (as defined in the below author licence), an exclusive licence and/or a non-exclusive licence for contributions from authors who are: i) UK Crown employees; ii) where BMJ has agreed a CC-BY licence shall apply, and/or iii) in accordance with the terms applicable for US Federal Government officers or employees acting as part of their official duties; on a worldwide, perpetual, irrevocable, royalty-free basis to BMJ Publishing Group Ltd ("BMJ") its licensees and where the relevant Journal is co-owned by BMJ to the co-owners of the Journal, to publish the Work in this journal and any other BMJ products and to exploit all rights, as set out in our [licence](#).

The Submitting Author accepts and understands that any supply made under these terms is made by BMJ to the Submitting Author unless you are acting as an employee on behalf of your employer or a postgraduate student of an affiliated institution which is paying any applicable article publishing charge ("APC") for Open Access articles. Where the Submitting Author wishes to make the Work available on an Open Access basis (and intends to pay the relevant APC), the terms of reuse of such Open Access shall be governed by a Creative Commons licence – details of these licences and which [Creative Commons](#) licence will apply to this Work are set out in our licence referred to above.

Other than as permitted in any relevant BMJ Author's Self Archiving Policies, I confirm this Work has not been accepted for publication elsewhere, is not being considered for publication elsewhere and does not duplicate material already published. I confirm all authors consent to publication of this Work and authorise the granting of this licence.

**Title:** Retrospective Cohort Study of Clinical Characteristics of 2,199 Hospitalized COVID-19 Patients in New York City

**Authors:**

Ishan Paranjpe, BS<sup>1+</sup>, Adam J Russak, MD<sup>1,2+</sup>, Jessica K De Freitas, BS<sup>1,3+</sup>, Anuradha Lala, MD<sup>4,5+</sup>, Riccardo Miotto, PhD<sup>1,3</sup>, Akhil Vaid, MD<sup>1,3</sup>, Kipp W Johnson, PhD<sup>1,3</sup>, Matteo Danieletto, PhD<sup>1,3</sup>, Eddy Golden, BS<sup>1,3</sup>, Dara Meyer, BS<sup>3</sup>, Manbir Singh, BS<sup>1</sup>, Sulaiman Somani, BS<sup>1</sup>, Arjun Kapoor, MA<sup>1</sup>, Ross O'Hagan, BS<sup>1</sup>, Sayan Manna, BS<sup>1</sup>, Udit Nangia, BS<sup>1</sup>, Suraj Jaladanki, BS<sup>1</sup>, Paul F O'Reilly, PhD<sup>3,6,7</sup>, Laura M Huckins, PhD<sup>3,6,7</sup>, Patricia Glowe, BS<sup>1,3</sup>, Arash Kia, PhD<sup>5,8</sup>, Prem Timsina, PhD<sup>5,8</sup>, Robert M Freeman, MS<sup>5,8</sup>, Matthew A Levin, MD<sup>3,5,8,10</sup>, Jeffrey Jhang, MD<sup>9</sup>, Adolfo Firpo, MD<sup>9</sup>, Patricia Kovatch, PhD<sup>11</sup>, Joseph Finkelstein, PhD<sup>5</sup>, Judith A Aberg, MD<sup>12,13</sup>, Emilia Bagiella, PhD<sup>4,5</sup>, Carol R Horowitz, PhD<sup>5,13</sup>, Barbara Murphy, MD<sup>13</sup>, Zahi A Fayad, PhD<sup>15,16</sup>, Jagat Narula, MD PhD<sup>13,17</sup>, Eric J Nestler, MD PhD<sup>18,19</sup>, Valentin Fuster, MD PhD<sup>4,17</sup>, Carlos Cordon-Cardo, MD PhD<sup>9</sup>, Dennis S Charney, MD PhD<sup>20</sup>, David L Reich, MD<sup>21</sup>, Allan C Just, PhD<sup>22,23</sup>, Erwin P Bottinger, MD<sup>1\*</sup>, Alexander W Charney, MD PhD<sup>3,6,7,\*</sup>, Benjamin S Glicksberg, PhD<sup>1,3,6\*</sup>, Girish N Nadkarni, MD<sup>1,13,24\*</sup>, on behalf of the Mount Sinai COVID Informatics Center (MSCIC)

**Affiliations:**

1. The Hasso Plattner Institute for Digital Health at Mount Sinai,
2. Department of Internal Medicine,
3. Department of Genetics and Genomic Sciences,
4. The Zena and Michael A. Wiener Cardiovascular Institute,
5. Department of Population Health Science and Policy,
6. The Pamela Sklar Division of Psychiatric Genomics,
7. The Department of Psychiatry,
8. Institute for Healthcare Delivery Science,
9. Department of Pathology, Molecular and Cell-Based Medicine
10. Icahn Institute for Data Science and Genomic Technology,
11. Mount Sinai Data Warehouse,
12. Division of Infectious Diseases,
13. Department of Medicine,
14. The Charles Bronfman Institute for Personalized Medicine,
15. The BioMedical Engineering and Imaging Institute,
16. Department of Radiology,
17. Department of Cardiology,
18. The Nash Family Department of Neuroscience,
19. The Friedman Brain Institute,
20. The Office of the Dean,
21. Department of Anesthesiology, Perioperative and Pain Medicine,
22. Department of Environmental Medicine and Public Health,
23. Institute for Exposomic Research,
24. The Charles Bronfman Institute for Personalized Medicine, Icahn School of Medicine at Mount Sinai

1  
2  
3 + These authors contributed equally

4  
5 \* These authors jointly supervised this work

6  
7 **Correspondence:**

8  
9  
10 Please address correspondence to:

11  
12  
13 Ishan Paranjpe  
14 Ishan.paranjpe@icahn.mssm.edu  
15

16  
17  
18 **Words: 3307**

19  
20  
21 **Funding:**

22 This work was Supported by U54 TR001433-05, National Center for Advancing  
23 Translational Sciences, National Institutes of Health.  
24  
25  
26  
27  
28  
29  
30  
31  
32

33  
34 **ABSTRACT**

35  
36  
37 **Objective:**

38 The coronavirus 2019 (COVID-19) pandemic is a global public health crisis, with over  
39 33 million cases and 999,000 deaths worldwide. Data are needed regarding the clinical  
40 course of hospitalized patients, particularly in the United States.

41 We aimed to compare clinical characteristic of COVID-19 patients who had in-hospital  
42 mortality with those who were discharged alive.  
43  
44

45 **Design:** Demographic, clinical, and outcomes data for patients admitted to five Mount  
46 Sinai Health System hospitals with confirmed COVID-19 between February 27 and April  
47 2, 2020 were identified through institutional electronic health records. We performed a  
48 retrospective comparative analysis of patients who had in-hospital mortality or were  
49 discharged alive.  
50

51  
52 **Setting:**

53 All patients were admitted to the Mount Sinai Health System, a large quaternary care  
54 urban hospital system.  
55  
56  
57  
58  
59  
60

**Participants:**

Participants over the age of 18 years were included.

**Primary Outcomes:**

We investigated in-hospital mortality during the study period.

**Results**

A total of 2,199 patients with COVID-19 were hospitalized during the study period. As of April 2<sup>nd</sup>, 1,121 (51%) patients remained hospitalized, and 1,078 (49%) completed their hospital course. Of the latter, the overall mortality was 29%, and 36% required intensive care. The median age was 65 years overall and 75 years in those who died. Pre-existing conditions were present in 65% of those who died and 46% of those discharged. In those who died, the admission median lymphocyte percentage was 11.7%, D-dimer was 2.4 ug/ml, C-reactive protein was 162 mg/L, and procalcitonin was 0.44 ng/mL. In those discharged, the admission median lymphocyte percentage was 16.6%, D-dimer was 0.93 ug/ml, C-reactive protein was 79 mg/L, and procalcitonin was 0.09 ng/mL.

**Conclusions**

In our cohort of hospitalized patients, requirement of intensive care and mortality were high. Patients who died typically had more pre-existing conditions and greater perturbations in inflammatory markers as compared to those who were discharged.

**Strengths and limitations of this study:**

- Our cohort includes greater racial diversity as compared to previously published work
- Largest hospitalized cohort of COVID-19 patients in New York City
- Limited by lack of access to clinical notes
- Our study is limited by the short followup time period
- Our study is limited by high censoring rate

**INTRODUCTION**

The Coronavirus disease (COVID-19) pandemic, caused by severe acute respiratory syndrome coronavirus-2 (SARS-CoV-2), has held the world at a standstill with its virulence. As of September 28, 2020, over 33 million people have been affected, and more than 999,000 patients have died worldwide<sup>1</sup>. In addition to being highly contagious, the disease manifestations and clinical course are variable, spanning from asymptomatic status to severe acute respiratory distress syndrome with multiorgan failure and death<sup>2,3</sup>, acute kidney injury<sup>4,5</sup>, acute myocardial injury<sup>6</sup>, and coagulopathy<sup>7-11</sup>.

Reports from China and Italy provided early data on disease presentation and management<sup>12-14</sup> but also revealed varying geographic disease expressions. Nearly one-third of the world's cases are now in the United States (US), and with nearly one-

1  
2  
3 third of those cases located in New York, it represents the current epicenter of the  
4 COVID-19 pandemic<sup>15</sup>.  
5

6  
7 As the number of cases continues to climb, hospitals are being stretched well-beyond  
8 capacity while facing challenges of insufficient personal protective equipment (PPE),  
9 ventilators, and workforce. Thus, understanding the clinical course of hospitalized  
10 COVID-19 patients is critical not only for providing optimal patient care but also to  
11 inform resource management in other locations across the US likely to experience  
12 similar case surges<sup>16</sup>. Data specifically examining differences in admission laboratory  
13 data in patients who died as compared to those who were ultimately discharged is  
14 lacking.  
15

16  
17 The Mount Sinai Healthcare System (MSHS) is the largest academic health system in  
18 New York City and serves as an ideal platform to better understand the evolving  
19 landscape of COVID-19 across a diverse population. Here, we present the largest case  
20 series of patients hospitalized with laboratory confirmed COVID-19 to date in the US.  
21  
22

## 23 **METHODS**

### 24 **Patient involvement**

25 Patients and the public were not directly involved in the study design or implementation.  
26  
27

### 28 **Study Population**

29 The MSHS serves a large, racially and ethnically diverse patient population. In this  
30 study, patient data came from 5 major hospitals: the Mount Sinai Hospital located in  
31 East Harlem, Manhattan; Mount Sinai Morningside located in Morningside Heights,  
32 Manhattan; Mount Sinai West located in Midtown and the West Side, Manhattan; Mount  
33 Sinai Brooklyn located in Midwood, Brooklyn; and Mount Sinai Queens located in  
34 Astoria, Queens. We included patients who were at least 18 years old, had a laboratory-  
35 confirmed COVID-19 infection, and were admitted to any of the aforementioned 5  
36 MSHS hospitals between February 27 and 12 a.m. April 2, 2020 (time of data freeze). A  
37 confirmed case of COVID-19 was defined by a positive reverse transcriptase  
38 polymerase chain reaction (RT-PCR) assay of a specimen collected via nasopharyngeal  
39 swab. The Mount Sinai Institutional Review Board approved this research under a broad  
40 regulatory protocol allowing for analysis of limited patient-level data.  
41  
42  
43

### 44 Detection of Viral RNA

45 Nasopharyngeal swab specimens were taken from all patients and placed in 120-140  
46 µL viral transport media (VTM). Ribonucleic acid (RNA) was purified from specimens  
47 using either the Qiacube Connect (Qiagen), QIAamp Viral RNA mini kit (Qiagen), or the  
48 EZ1 DSP Virus kit (Qiagen). SARS-CoV-2 RNA was detected using the qualitative  
49 cobas® SARS-CoV-2 kit using the cobas® 6800 system. For detection, a two-target  
50 reverse transcriptase polymerase chain reaction (RT-PCR) using 1) SARS-CoV-2  
51 specific primers and 2) pan-sarbecovirus primers as included in the cobas® master mix.  
52 All assays were performed in a CLIA certified high complexity laboratory at the Mount  
53 Sinai Health System.  
54  
55  
56  
57  
58  
59

## Data Collection

The dataset was obtained from different sources and aggregated by the New York Covid Informatics Taskforce (NYCIT) (Further description of NYCIT is provided in Supplementary Material). We obtained demographics, diagnosis codes (International Classification of Diseases-9/10-Clinical Modification (ICD-9/10-CM) codes and procedures, as well as vital signs and laboratory measurements during hospitalization. Demographics included age, sex, and language, as well as race and ethnicity in the electronic health records. Racial groups included White, Black or African American, Asian, Pacific Islander, Other, and Unknown. Ethnic groups included Non-Hispanic/Latino, Hispanic/Latino, or Unknown. All vital signs and laboratory values were obtained as part of indicated clinical care.

## Definitions of Pre-existing Conditions

We defined a pre-existing condition as the presence of diagnosis codes associated with specific diseases. Diagnoses and corresponding ICD codes are provided in **Supplemental Table 1**.

## Definitions of Outcomes

We assessed in-hospital mortality and admission to intensive care.

## Statistical Analysis

Results are reported as medians and interquartile ranges or means and standard deviations, as appropriate. Categorical variables were summarized as counts and percentages. Statistical significance was evaluated using a Wilcoxon test for continuous variables and a Fisher-exact test for categorical variables. We visualized length of stay (LOS) using a cumulative incidence function with competing risks for mutually exclusive events of in-hospital mortality or discharge. Patients who were still hospitalized at the time of data freeze were regarded as having a censored LOS. We assumed censored observations from patients with ongoing hospitalization will not exceed the longest LOS in our dataset when calculating the restricted mean LOS. No imputation was made for missing data. Analysis was performed with R<sup>17</sup>.

## Data Availability

**Please contact authors for information on data availability.**

## RESULTS

A consort diagram of included patients and outcomes is depicted in **Supplementary Figure 1**.

### Demographic and Clinical Characteristics

From February 27 to April 2, 2020, 2,199 COVID-19 positive patients were hospitalized at one of five MSHS New York City hospitals. At the time of writing this report, 1,121 (51%) patients remained hospitalized and 1,078 (49%) completed their hospital course,

with 768 discharges and 310 deaths. **Figure 1** details the number of patients admitted to the hospital per day and the total number of patients admitted cumulatively over time. During the study period, the trend of hospital admissions per day consistently increased.

Patient demographics, pre-existing conditions as well as vital signs and laboratory values at the time of admission are displayed in Table 1. Median age was 65 years with only 3% of patients less than 30 years and 36% over 70 years. The proportion of men was higher (59%) than women (41%) and 25% had their race identified as White, 25% as African American, and 3% as Asian. One quarter of the population has their ethnicity identified as Hispanic/Latino. More than half of the population had at least one pre-existing condition. Specifically, 37% presented with a history of hypertension, 27% with diabetes mellitus, 16% with coronary artery disease, 10% with heart failure and 9% with chronic kidney disease.

#### Laboratory Results and Vital Signs at Presentation

Overall, 1,558 (71%) of patients were admitted through the emergency department. On hospital admission, 39% of all patients were tachycardic and 88% of all patients were febrile (**Table 1**). The median white blood cell count was 7 K/uL and lymphocyte percentage was 13.8. The median serum creatinine was 1 mg/dL. Select inflammatory markers performed in subsets of patients in accordance with clinical indication were markedly elevated on admission (**Table 1**). Specifically, the median C-reactive protein (CRP) was 110 mg/L, lactate dehydrogenase (LDH) was 416 U/L, and ferritin was 714 ng/L. Over one-quarter of patients (28%) had a procalcitonin level above 0.49 ng/mL, and nearly half of patients (46%) had a procalcitonin level less than 0.15 ng/mL. The median D-dimer was 1.31 ug/mL; one-third of patients (33%) had a D-dimer greater than 2 ug/mL.

The frequencies of otherwise non-routine laboratory assessments ordered on day of admission increased over time and are shown in **Supplementary Figure 2**. In contrast, hemoglobin, a routinely measured clinical lab value, was ordered at admission in the majority of patients without variation over the study period.

#### Clinical Outcomes

Due to the unknown future clinical course of those patients hospitalized at the time of data freeze, below we present clinical characteristics of only those patients who had completed their hospital course. A total of 1,078 COVID-19 confirmed hospitalized patients completed their hospital course (died or discharged alive) by the date of data freeze on April 02, 2020. Of these, 768 (71%) were discharged and 310 (29%) died in the hospital. Estimates for mortality and need for ICU admissions over time are displayed in **Figure 2**.

The median LOS was 7.7 days, accounting for censoring of patients with ongoing hospitalization. By the mean LOS (10.5 days), 45% of patients had been discharged, 17% had died, and 38% were still hospitalized (**Figure 2**). Demographics and admission laboratory measurements for patients who completed their hospital course are displayed in **Table 2**, stratified by mortality. The median age was significantly greater in



1  
2  
3 those who died as compared to those who were discharged (75 years vs 59 years;  
4  $p < 0.001$ ). Pre-existing conditions were present in 64% of those who died and 46% of  
5 those discharged. We observed a significantly greater prevalence of diabetes (34% vs  
6 20%;  $p = 0.004$ ), chronic obstructive pulmonary disease (9% vs 4%;  $p = 0.002$ ), heart  
7 failure (21% vs 7%;  $p < 0.001$ ), stroke (10% vs 5%;  $p = 0.004$ ), and hypertension (45% vs  
8 30%;  $p < 0.001$ ) in those who died as compared to those who were discharged.  
9 Prevalence of other comorbidities are provided in **Table 2**.  
10  
11

12 We present key laboratory markers at the time of hospital admission in subsets of  
13 patients for whom they were measured. Patients who died had a significantly lower  
14 median lymphocyte percentage (11.7% vs 16.6%;  $p < 0.001$ ) and greater aspartate  
15 aminotransferase (AST) (58.5 U/L vs 36;  $p < 0.001$ ), CRP (162 mg/L vs 79;  $p < 0.001$ ),  
16 ferritin (798 ng/L vs 509 ng/L;  $p < 0.001$ ), LDH (517 U/L vs 347 U/L;  $p < 0.001$ ), and  
17 procalcitonin (0.44 ng/mL vs 0.09 ng/mL;  $p < 0.001$ ) as compared to those who were  
18 discharged (**Table 2**). We also observed a significant elevation in D-Dimer (56%  $> 2.0$   
19  $\mu\text{g/mL}$  vs 21%  $> 2.0 \mu\text{g/mL}$ ;  $p < 0.001$ ) in those who died as compared to those who were  
20 discharged.  
21  
22  
23  
24  
25

### 26 Patients Requiring ICU Admission

27 Of the 1,078 patients who completed their hospital course, 385 (36%) required intensive  
28 care during their hospital stay. For these patients, vital signs and laboratory values  
29 immediately before transfer to intensive care are displayed in **Table 3**, stratified by  
30 mortality outcome. Immediately before their ICU admission, patients who died were  
31 more likely to be tachycardiac (38% vs 19%;  $p < 0.001$ ) and hypotensive (22% vs 4%;  $p$   
32  $< 0.001$ ) as compared to those who were ultimately discharged. We also observed that  
33 patients who died had a lower median lymphocyte percentage (9.6% vs 16.6%) and  
34 greater serum creatinine (1.5 mg/dL vs 0.6 mg/dL;  $p < 0.001$ ), AST (62 U/L vs 35;  
35  $p < 0.001$ ), CRP (220 mg/L vs 76 mg/L;  $p < 0.001$ ), ferritin (920 ng/L vs 503;  $p < 0.001$ ),  
36 procalcitonin greater than 0.49 mg/mL (59% vs 10%;  $p < 0.001$ ), LDH (513 U/L vs 333  
37 U/L;  $p < 0.001$ ), CK (659 U/L vs 146;  $p < 0.001$ ) and D-dimer greater than 2  $\mu\text{g/mL}$  (63% vs  
38 22%;  $p < 0.001$ ) as compared to those who were discharged (**Table 3**).  
39  
40  
41

### 42 Outcomes by Race

43 Including all individuals (N= 2199), we then investigated survival probability stratified  
44 self-reported race and ethnicity by fitting a Cox proportional hazards model adjusted for  
45 age and sex (**Supplementary Figure 3**). As compared to White individuals, we did not  
46 find a significant association of survival with self-reported Black (HR = 0.88;  $p = 0.37$ ),  
47 or other race (HR = 1.12;  $p = 0.45$ ). We also did not find a significant association of  
48 survival with Hispanic ethnicity (HR = 1.10;  $p = 0.50$ ).  
49  
50

## 51 **DISCUSSION**

52  
53  
54 The COVID-19 pandemic represents the greatest public health emergency in the  
55 modern world. Limited data, especially in the US, exists to guide clinical care, resource  
56  
57  
58  
59  
60

1  
2  
3 management, and risk stratification in hospitalized patients. Our study is of the case  
4 series of patients reported with confirmed COVID-19 in the US. Previous reports were  
5 either from other countries, examined smaller cohorts, or were focused on critically ill  
6 patients<sup>13,14,18–23</sup>. The present report provides a broad perspective on patients admitted  
7 with COVID-19 in both general medicine ward and intensive care settings. Our study  
8 presents key clinical differences from laboratory data available at time of admission and  
9 thus would aid clinical management decision-making early in the hospital course.  
10 Additionally, our health system serves a unique population representative of the ethnic  
11 and socioeconomic diversity seen in both New York City and across the United States.  
12  
13

14  
15 We highlight several key findings. Among the 1,078 patients who completed their  
16 hospital course (discharge or in-hospital death), the overall mortality rate was 29% and  
17 31% in patients who received ICU care. The overall case fatality rate likely represents  
18 an overestimation of the true disease mortality rate since patients who remained  
19 hospitalized at the date of data freeze were not included in this calculation. The  
20 mortality rate in intensive care is lower than previously described<sup>13,23–25</sup> and may be  
21 reflective of early care escalation.  
22  
23

24 We observed that patients who died had a significantly higher median age with  
25 significantly more pre-existing conditions than those who were discharged. Though 25%  
26 of patients were febrile on admission, this may be an underestimation due to possible  
27 antipyretic use and/or selection bias. A substantial proportion of patients with COVID-19  
28 displayed abnormal laboratory measurements at the time of admission. These included  
29 lymphopenia and elevated inflammatory markers such as D-dimer, CRP, LDH, and  
30 ferritin. These trends persisted among those who died and/or received intensive care,  
31 both on admission and at the time of ICU transfer. If formal epidemiologic analyses  
32 confirm these observations, early laboratory evaluation may be crucial in identifying  
33 patients suspected for COVID-19 prior to RT-PCR test result. It may also aid clinicians  
34 in identifying patients at high risk of decompensation, ICU admission, and potentially  
35 even death. Early identification of high-risk patients could enable timely patient triage  
36 and improved resource allocation. Additional work is needed to develop real-time,  
37 accurate predictive models for risk stratification in COVID-19, particularly to elucidate  
38 the clinical utility of specific laboratory measurements.  
39  
40  
41

42 Han et al. found a significant association of serum lactate dehydrogenase and c-  
43 reactive protein with COVID-19 severity in patients from China<sup>26</sup>. As the number of  
44 cases rose quickly in New York City, MSHS hospitals served as early adopters, creating  
45 a COVID-19 order set in our EHR to streamline objective data gathering, facilitate more  
46 cohesive workflow amongst team members, and minimize ancillary staff exposure by  
47 completing all necessary admission labs at one time. This laboratory order set included  
48 serum D-dimer, C-reactive protein, procalcitonin, ferritin, and lactate dehydrogenase. In  
49 turn, we observed an increase in these orders from the first day of admission over the  
50 study period (**Supplementary Figure 2**). Given the abnormalities observed in patients  
51 who died, these laboratory measurements may be prognostic markers of disease  
52 severity or subsequent clinical course, although this requires further investigation. If  
53  
54  
55  
56  
57  
58  
59  
60

1  
2  
3 confirmed, other health systems expecting impending case surges may consider similar  
4 workflows to promote improved healthcare delivery to affected patients.  
5

6  
7 We found a significantly higher procalcitonin level in individuals who died as compared  
8 to those who were discharged alive. Moreover, of the 2,199 individuals in the study,  
9 28% had a procalcitonin greater than 0.49. In the context of COVID-19, an elevated  
10 procalcitonin may signify a superimposed bacterial infection, but may also be a marker  
11 of acute respiratory distress syndrome or a result of upregulated cytokine production  
12 secondary to respiratory failure. Additionally, we found that individuals who died in the  
13 ICU had higher procalcitonin levels, supporting previous work demonstrating that  
14 patients with more severe COVID-19 infections have higher procalcitonin levels<sup>22,27</sup>.  
15

16  
17 The clinical characteristics of our cohort were largely similar to other large cohorts of  
18 COVID-19 patients from China<sup>2,22</sup> and Italy. Specifically, patients in our dataset were  
19 elderly and had a male predominance, similar to previous reports. There was also a  
20 high prevalence of comorbid conditions, including hypertension and diabetes mellitus.  
21 Similar to an early report from Wuhan, patients largely had a normal procalcitonin at  
22 admission, but individual requiring ICU care had a higher procalcitonin level. However,  
23 as compared studies from Wuhan, China<sup>22</sup> and Genoa, Italy<sup>14</sup>, and New York City<sup>28</sup>, our  
24 cohort had a significantly lower prevalence of lymphopenia at admission.  
25

26  
27 Our study should be considered in light of several limitations. Since COVID-19 testing is  
28 frequently repeated in hospitalized patients and initial testing may result in false  
29 negatives, we are unable to determine whether patients developed their infection during  
30 or before hospital admission. Furthermore, COVID-19 has a variable incubation period  
31 of approximately 8-15 days<sup>29</sup>, and patients may present to the hospital several days  
32 after initial infection or the onset of symptoms. Thus, we are unable to determine  
33 patients' disease duration. Additionally, we separated discharged patients from those  
34 who died, but some patients may have expired after discharge. This could affect our  
35 listed case mortality rate. Our study is also confined by the inherent limitations (e.g.  
36 biases) of EHR data. Although utilizing structured EHR data allows for rapid integration  
37 of multiple data streams and real-time analysis, data present only in clinical note text,  
38 such as symptoms on presentation are missed. Additionally, symptoms present before  
39 the time of admission were not included. We chose not to perform comprehensive  
40 manual chart review to prioritize timely dissemination of our observations. Another  
41 limitation of our dataset is the large proportion of individuals that were censored. These  
42 individuals remained in the hospital at the time of data analysis and thus had unknown  
43 outcomes. Future work will analyze these patients' hospital course in greater detail with  
44 complete outcomes data.  
45  
46  
47  
48

49 As the COVID-19 pandemic spreads from the current epicenter in New York City to  
50 other areas, our report provides meaningful clinical insights that may better inform care  
51 for diverse populations. Future work will aim to predict COVID-19 patient outcomes  
52 using a variety of approaches, thereby reducing healthcare system burden and  
53 permitting improved care delivery.  
54  
55  
56  
57  
58  
59  
60

## Figures

**Figure 1:** Hospital Admissions of COVID-19 patients within our cohort.

Panel A: The number of total patients (n = 2,199) admitted each day to one of the hospitals for the duration of the study period. Panel B: The number of patients cumulatively admitted, cumulatively discharged, or still hospitalized by day.

**Figure 2:** Cumulative incidence function displays the probability of mutually exclusive events of discharge (blue) or death (red) by a given day of hospitalization, accounting for the changing number of patients at risk including censoring. The remaining portion (white) shows patients that are still hospitalized, where the median length of stay is 7.7 days.

**Table 1.** Characteristics of Hospitalized COVID-19 Patients at Baseline (n=2,199)

| Characteristics of Admission                             |             | N with characteristic available |
|----------------------------------------------------------|-------------|---------------------------------|
| <b>Admission Source, n (%)</b>                           |             |                                 |
| Emergency Department                                     | 1558 (71)   | 2199                            |
| Other                                                    | 641 (29)    |                                 |
| <b>Race, n (%)</b>                                       |             |                                 |
| White                                                    | 554 (25.2)  | 2199                            |
| Black or African American                                | 543 (24.7)  |                                 |
| Asian                                                    | 74 (3.4)    |                                 |
| Pacific Islander                                         | 25 (1.1)    |                                 |
| Other                                                    | 912 (41.5)  |                                 |
| Unknown                                                  | 91 (4.1)    |                                 |
| <b>Ethnicity, n (%)</b>                                  |             |                                 |
| Hispanic/Latino                                          | 576 (26.2)  | 2199                            |
| Non-Hispanic/Latino                                      | 1305 (59.4) |                                 |
| Unknown                                                  | 318 (14.5)  |                                 |
| <b>Age, Median (IQR)</b>                                 | 65 (54-76)  | 2199                            |
| <b>Age Groups, n (%)</b>                                 |             |                                 |
| 18-30                                                    | 73 (3.3)    | 2199                            |
| 31-40                                                    | 179 (8.1)   |                                 |
| 41-50                                                    | 225 (10.2)  |                                 |
| 51-60                                                    | 395 (18.0)  |                                 |
| 61-70                                                    | 527 (24.0)  |                                 |
| 71-80                                                    | 444(20.2)   |                                 |
| 81-90                                                    | 274 (12.5)  |                                 |
| 91 or older                                              | 82 (3.7)    |                                 |
| <b>Sex, n (%)</b>                                        |             |                                 |
| Male                                                     | 1293 (58.8) | 2199                            |
| Female                                                   | 906 (41.2)  |                                 |
| <b>Body Mass Index in kg/m<sup>2</sup>, Median (IQR)</b> | 28 (6)      | 1316                            |
| <b>Previous Medical History, n (%)</b>                   |             |                                 |
| Atrial Fibrillation                                      | 156 (7.1)   | 2199                            |
| Asthma                                                   | 180 (8.2)   |                                 |
| Coronary Artery Disease                                  | 343 (15.6)  |                                 |
| Cancer                                                   | 151 (6.9)   |                                 |
| Chronic Kidney Disease                                   | 207 (9.4)   |                                 |
| Chronic Obstructive Pulmonary Disease                    | 113 (5.1)   |                                 |
| Diabetes Mellitus                                        | 583 (26.5)  |                                 |

|                                                           |                   |      |
|-----------------------------------------------------------|-------------------|------|
| Heart Failure                                             | 217 (9.9)         |      |
| Hypertension                                              | 812 (37)          |      |
| Stroke                                                    | 153 (7)           |      |
| <b>Vital Signs at Hospital Admission</b>                  |                   |      |
| Heart Rate in beats per min, Median (IQR)                 | 95 (83-108)       | 2181 |
| Number of patients >100 Beats per min, n(%)               | 857 (39)          |      |
| Temperature in degree Fahrenheit, Median (IQR)            | 99 (98.2 – 100.4) | 2180 |
| Number of patients >100.4-degree Fahrenheit, n (%)        | 1926 (88)         |      |
| Respiratory Rate in breaths/minute, Median (IQR)          | 20 (18-21)        |      |
| Systolic Blood Pressure in mmHg, Median (IQR)             | 130 (116-145)     | 2176 |
| Diastolic Blood Pressure in mmHg, Median (IQR)            | 74 (65-82)        |      |
| Oxygen Saturation, Median (IQR)                           | 95 (92-97)        | 2176 |
| <b>Admission Laboratory Parameters, Median (IQR)</b>      |                   |      |
| White Blood Cell Count -K/uL, Median (IQR)                | 7 (5.2-9.9)       | 2029 |
| Number of patients >10, n (%)                             | 498 (25)          | 2029 |
| Number of patients <4, n (%)                              | 224 (11)          | 2029 |
| Lymphocyte Count - K/uL, Median (IQR)                     | 0.9 (0.7-1.3)     | 1888 |
| Lymphocyte Percentage, Median (IQR)                       | 13.8(8.5-20.5)    | 1972 |
| Hemoglobin - g/dL, Median (IQR)                           | 13.1(11.6-14.4)   | 2031 |
| Platelet Count - K/uL, Median (IQR)                       | 195(151-253)      | 2028 |
| Prothrombin Time - sec, Median (IQR)                      | 13.9(13.2-15)     | 937  |
| Activated Partial Thromboplastin Time - sec, Median (IQR) | 32 (29-36.1)      | 926  |
| Serum Sodium - mEq/L, Median (IQR)                        | 137 (134-140)     | 2015 |
| Serum Potassium - mEq/L, Median (IQR)                     | 4.2 (3.9-4.6)     | 2006 |
| Serum Creatinine - mg/dL, Median (IQR)                    | 1 (0.8-1.5)       | 2018 |
| Aspartate aminotransferase - U/L, Median (IQR)            | 42 (30-70.5)      | 1815 |
| Alanine aminotransferase - U/L, Median (IQR)              | 32 (19-56)        | 1025 |
| Serum Albumin - g/dL, Median (IQR)                        | 3.2 (2.8-3.6)     | 1848 |
| Venous lactate - mmol/L, Median (IQR)                     | 1.5 (1.1-2)       | 775  |
| Number of patients >1.5, n (%)                            | 392 (51)          | 775  |
| <b>Inflammatory Markers</b>                               |                   |      |

|                                               |                  |      |
|-----------------------------------------------|------------------|------|
| C-Reactive Protein - mg/L, Median (IQR)       | 110 (57.8-196)   | 1354 |
| Ferritin -ng/L, Median (IQR)                  | 714 (324-1730)   | 1324 |
| Procalcitonin -ng/mL, Median (IQR)            | 0.18 (0.08-0.57) | 1241 |
| Number of patients >0.49, n (%)               | 344 (28)         | 1241 |
| Number of patients <0.15, n (%)               | 573 (46)         | 1241 |
| Lactate Dehydrogenase -U/L, Median (IQR)      | 416 (314-545)    | 1290 |
| Creatinine Kinase - U/L, Median (IQR)         | 199 (97-565)     | 502  |
| D-Dimer -ug/mL, Median (IQR)                  | 1.31 (0.74-2.44) | 1079 |
| Number of patients >2.0, n (%)                | 352 (33)         | 1079 |
| <b>Required Mechanical Ventilation, n (%)</b> | 446 (20)         | 2199 |

Baseline values are defined as first values on hospitalization. All continuous characteristics are in Median (Interquartile Range) unless specified otherwise and all categorical characteristics are in number (percentage). The percentage is calculated with the number of patients who had the characteristic available as the denominator. For further clarity, the number in which that characteristic was available for is provided separately in adjacent column.

**Table 2.** Characteristics of Hospitalized COVID-19 patients by patients who had in-hospital mortality vs. those who were discharged alive (N=1,078). Continuous and categorical variables were compared using a Wilcoxon test and Fisher exact test, respectively.

|                                                          | <b>Patients with In-Hospital Mortality (n=310)</b> | <b>N with characteristic available</b> | <b>Patients who were discharged alive (n=768)</b> | <b>N with characteristic available</b> | <b>P value</b> |
|----------------------------------------------------------|----------------------------------------------------|----------------------------------------|---------------------------------------------------|----------------------------------------|----------------|
| Required Mechanical Ventilation, n (%)                   | 165 (53)                                           | 310                                    | 14 (1.8)                                          | 768                                    | <0.001         |
| Time to ICU (hours), Median (IQR)                        | 11.0 (4.9 - 44.7)                                  | 121                                    | 12.6 (3.1 - 11.1)                                 | 264                                    | <0.001         |
| <b>Race, n (%)</b>                                       |                                                    |                                        |                                                   |                                        |                |
| White                                                    | 98 (31.6)                                          | 310                                    | 216 (28.1)                                        | 768                                    | <0.001         |
| Black or African American                                | 71 (22.9)                                          |                                        | 185 (24.1)                                        |                                        |                |
| Asian                                                    | 17 (5.5)                                           |                                        | 22 (2.9)                                          |                                        |                |
| Pacific Islander                                         | 1 (0.3)                                            |                                        | 7 (0.9)                                           |                                        |                |
| Other                                                    | 111 (35.8)                                         |                                        | 310 (40.4)                                        |                                        |                |
| Unknown                                                  | 12 (3.9)                                           |                                        | 28 (3.6)                                          |                                        |                |
| <b>Ethnicity, n (%)</b>                                  |                                                    |                                        |                                                   |                                        |                |
| Hispanic/Latino                                          | 58 (18.7)                                          | 310                                    | 208 (27.1)                                        | 768                                    | 0.005          |
| Non-Hispanic/Latino                                      | 198 (63.9)                                         |                                        | 464 (60.4)                                        |                                        |                |
| Unknown                                                  | 54 (17.4)                                          |                                        | 96 (12.5)                                         |                                        |                |
| <b>Age, Median (IQR)</b>                                 | 75 (64-85)                                         |                                        | 59 (45-72)                                        |                                        | <0.001         |
| <b>Age Groups, n (%)</b>                                 |                                                    |                                        |                                                   |                                        |                |
| 18-30                                                    | 1 (0.32)                                           | 310                                    | 53 (6.9)                                          | 768                                    |                |
| 31-40                                                    | 2 (0.65)                                           |                                        | 108 (14.1)                                        |                                        |                |
| 41-50                                                    | 17 (5.5)                                           |                                        | 100 (13.0)                                        |                                        |                |
| 51-60                                                    | 37 (11.9)                                          |                                        | 143 (18.6)                                        |                                        |                |
| 61-70                                                    | 66 (21.3)                                          |                                        | 157 (20.4)                                        |                                        |                |
| 71-80                                                    | 83 (26.8)                                          |                                        | 130 (16.9)                                        |                                        |                |
| 80-90                                                    | 75 (24.2)                                          |                                        | 62 (8.1)                                          |                                        |                |
| >90                                                      | 29 (9.4)                                           |                                        | 15 (2.0)                                          |                                        |                |
| <b>Sex, n (%)</b>                                        |                                                    |                                        |                                                   |                                        |                |
| Male                                                     | 191 (61.6)                                         | 310                                    | 436 (56.8)                                        | 768                                    | 0.16           |
| Female                                                   | 119 (38.4)                                         |                                        | 332 (43.2)                                        |                                        |                |
| <b>Body Mass Index in kg/m<sup>2</sup>, Median (IQR)</b> | 32 (27-34)                                         | 241                                    | 28 (25-32)                                        | 627                                    | <0.001         |



| Previous Medical History, n (%)                           |                  |     |                  |     |        |
|-----------------------------------------------------------|------------------|-----|------------------|-----|--------|
| Atrial Fibrillation                                       | 43 (13.9)        | 768 | 42 (5.5)         | 768 | 0.91   |
| Asthma                                                    | 23 (7.4)         |     | 61 (7.9)         |     | 0.87   |
| Coronary Artery Disease                                   | 83 (26.8)        |     | 84 (10.9)        |     | <0.001 |
| Cancer                                                    | 24 (7.7)         |     | 40 (5.2)         |     | 0.147  |
| Chronic Kidney Disease                                    | 41 (13.2)        |     | 54 (7)           |     | 0.002  |
| Chronic Obstructive Pulmonary Disease                     | 28 (9)           |     | 31 (4)           |     | 0.002  |
| Diabetes Mellitus                                         | 105 (33.9)       |     | 151 (19.7)       |     | <0.001 |
| Heart Failure                                             | 64 (20.6)        |     | 53 (6.9)         |     | <0.001 |
| Hypertension                                              | 140 (45.2)       |     | 233 (30.3)       |     | <0.001 |
| Stroke                                                    | 32 (10.3)        |     | 40 (5.2)         |     | 0.004  |
| Admission Laboratory Parameters                           |                  |     |                  |     |        |
| White Blood Cell Count -K/ $\mu$ L, Median (IQR)          | 8.6 (5.9-12)     | 281 | 6.2 (4.7-8.2)    | 728 | <0.001 |
| Number of patients >10 K/ $\mu$ L, n (%)                  | 105(37)          | 281 | 101(14)          | 728 | <0.001 |
| Number of patients <4 K/ $\mu$ L, n (%)                   | 17 (6)           | 281 | 106 (15)         | 728 | <0.001 |
| Hemoglobin - g/dL, Median (IQR)                           | 12.6 (10.9-14.3) | 282 | 13.2 (11.9-14.4) | 728 | <0.001 |
| Platelet Count - K/uL, Median (IQR)                       | 185 (144-239)    | 282 | 193 (153-247)    | 726 | 0.070  |
| Lymphocyte Count - K/ $\mu$ L, Median (IQR)               | 0.9 (0.6-1.3)    | 248 | 1 (0.8-1.4)      | 689 | <0.001 |
| Lymphocyte Percentage, Median (IQR)                       | 11.7 (6.6-18.6)  | 270 | 16.6 (11.7-24.2) | 710 | <0.001 |
| Prothrombin Time - sec, Median (IQR)                      | 14.2 (13.6-16.3) | 142 | 13.5 (13-14.4)   | 304 | <0.001 |
| Activated Partial Thromboplastin Time - sec, Median (IQR) | 32.9 (30.2-37.6) | 140 | 31.4 (28.7-34.8) | 302 | 0.001  |

|                                                |                  |     |                  |     |        |
|------------------------------------------------|------------------|-----|------------------|-----|--------|
| Serum Sodium - mEq/L, Median (IQR)             | 138 (134-141)    | 284 | 137 (135-140)    | 708 | 0.059  |
| Serum Potassium - mEq/L, Median (IQR)          | 4.4 (4-5)        | 288 | 4.1 (3.8-4.5)    | 706 | <0.001 |
| Serum Creatinine - mg/dL, Median (IQR)         | 1.3 (0.9-2.2)    | 288 | 0.9(0.7-1.2)     | 710 | <0.001 |
| Aspartate aminotransferase - U/L, Median (IQR) | 58.5 (34-102)    | 246 | 36 (26-54)       | 628 | <0.001 |
| Alanine aminotransferase - U/L, Median (IQR)   | 32 (19-58)       | 119 | 30 (19-52)       | 358 | 0.47   |
| Serum Albumin - g/dL, Median (IQR)             | 3 (2.7-3.4)      | 255 | 3.4 (3-3.7)      | 635 | <0.001 |
| Venous lactate - mmol/L, Median (IQR)          | 1.8 (1.3-2.6)    | 108 | 1.3 (1.1-1.8)    | 236 | <0.001 |
| Number of patients >1.5 mmol/L, n (%)          | 74 (69)          | 108 | 88 (37)          | 236 | <0.001 |
| <b>Inflammatory Markers</b>                    |                  |     |                  |     |        |
| C-Reactive Protein - mg/L, Median (IQR)        | 162 (75.7-266)   | 141 | 79.3 (37.5-144)  | 422 | <0.001 |
| Ferritin -ng/L, Median (IQR)                   | 798 (397-2020)   | 146 | 509 (235-987)    | 410 | <0.001 |
| Procalcitonin - ng/mL, Median (IQR)            | 0.44 (0.16-1.45) | 138 | 0.09 (0.05-0.22) | 392 | <0.001 |
| Number of patients >0.49 ng/mL, n (%)          | 67 (49)          | 138 | 46 (12)          | 392 | <0.001 |
| Number of patients <0.15 ng/mL, n (%)          | 34 (25)          | 138 | 263 (67)         | 392 | <0.001 |
| Lactate Dehydrogenase - U/L, Median (IQR)      | 517(371-756)     | 134 | 347 (272-448)    | 419 | <0.001 |
| Creatinine Kinase - U/L, Median (IQR)          | 472 (139-940)    | 74  | 154 (84-319)     | 126 | <0.001 |

|                  |                                            |                      |     |                      |     |        |
|------------------|--------------------------------------------|----------------------|-----|----------------------|-----|--------|
| 1<br>2<br>3      | D-Dimer -<br>µg/mL, Median<br>(IQR)        | 2.41 (1.18-<br>3.79) | 117 | 0.93 (0.58-<br>1.61) | 282 | <0.001 |
| 4<br>5<br>6<br>7 | Number of<br>patients >2.0<br>µg/mL, n (%) | 66(56)               | 117 | 59 (21)              | 282 | <0.001 |

8  
9  
10  
11  
12  
13  
14  
15  
16  
17  
18  
19  
20  
21  
22  
23  
24  
25  
26  
27  
28  
29  
30  
31  
32  
33  
34  
35  
36  
37  
38  
39  
40  
41  
42  
43  
44  
45  
46  
47  
48  
49  
50  
51  
52  
53  
54  
55  
56  
57  
58  
59  
60

Baseline values are defined as first values on hospitalization. All continuous characteristics are in Median (Interquartile Range) unless specified otherwise and all categorical characteristics are in number (percentage). The percentage is calculated with the number of patients who had the characteristic available as the denominator. For further clarity, the number in which that characteristic was available for is provided separately in adjacent column.

**Table 3.** Selected characteristics for hospitalized COVID-19 patients before transfer to Intensive care stratified by in-hospital mortality (N= 385). Continuous and categorical variables were compared using a Wilcoxon test and Fisher exact test, respectively.

|                                                              | Patients with In-Hospital Mortality who Required Intensive Care (n=121) | N with characteristic available | Patients who were discharged alive but Required Intensive Care (n=264) | N with characteristic available | P Value |
|--------------------------------------------------------------|-------------------------------------------------------------------------|---------------------------------|------------------------------------------------------------------------|---------------------------------|---------|
| Required Mechanical Ventilation, n (%)                       | 95 (79)                                                                 | 121                             | 11 (4)                                                                 | 264                             | <0.001  |
| <b>Vital Signs, n (%)</b>                                    |                                                                         |                                 |                                                                        |                                 |         |
| Number of patients with heart rate >100 Beats per min, n (%) | 45 (38)                                                                 | 118                             | 51 (19)                                                                | 264                             | <0.001  |
| Number of patients with temperature >100.4F, n (%)           | 107 (91)                                                                |                                 | 228 (86)                                                               |                                 | 0.370   |
| Systolic Blood Pressure < 100 mm of Hg, n (%)                | 27 (22)                                                                 |                                 | 10 (4)                                                                 |                                 | <0.001  |
| Oxygen Saturation, Median (IQR)                              | 92 (88 – 95)                                                            |                                 | 95 (92 – 97)                                                           |                                 | <0.001  |
| <b>Admission Laboratory Parameters, Median (IQR)</b>         |                                                                         |                                 |                                                                        |                                 |         |
| White Blood Cell Count -K/ $\mu$ L, Median (IQR)             | 10.1 (6.3-14.7)                                                         | 111                             | 5.6 (4.3-7.7)                                                          | 258                             | <0.001  |
| Number of patients >10-K/ $\mu$ L, n (%)                     | 58 (52)                                                                 | 111                             | 28 (11)                                                                | 258                             | <0.001  |
| Number of patients <4 K/ $\mu$ L, n (%)                      | 6 (5)                                                                   | 111                             | 54 (21)                                                                | 258                             | <0.001  |
| Hemoglobin - g/dL, Median (IQR)                              | 12.1 (10.4-13.8)                                                        | 111                             | 13 (11.5-14.2)                                                         | 258                             | <0.001  |
| Platelet Count - K/ $\mu$ L, Median (IQR)                    | 185 (146-230)                                                           | 111                             | 191(153-248)                                                           | 258                             | 0.308   |
| Lymphocyte Count - K/ $\mu$ L, Median (IQR)                  | 0.8 (0.6-1.25)                                                          | 91                              | 1 (0.75-1.4)                                                           | 239                             | 0.003   |

|    |                             |                |     |                |     |        |
|----|-----------------------------|----------------|-----|----------------|-----|--------|
| 1  | Lymphocyte                  |                |     |                |     |        |
| 2  | Percentage, Median          | 9.6 (5.5-17.2) | 103 | 16.6 (12-26.4) | 251 | <0.001 |
| 3  | (IQR)                       |                |     |                |     |        |
| 4  | Prothrombin Time -          | 14.9 (13.8-    | 63  | 13.7(13.2-     | 97  | <0.001 |
| 5  | sec, Median (IQR)           | 16.7)          |     | 14.7)          |     |        |
| 6  | Activated Partial           | 34 (30.6-38.2) | 62  | 31.4 (29.4-35) | 96  | 0.027  |
| 7  | Thromboplastin Time         |                |     |                |     |        |
| 8  | - sec, Median (IQR)         |                |     |                |     |        |
| 9  | Serum Sodium -              | 137 (135-140)  | 114 | 137 (135-140)  | 237 | 0.449  |
| 10 | mEq/L, Median (IQR)         |                |     |                |     |        |
| 11 | Serum Potassium -           | 4.3 (4-4.9)    | 112 | 4.1 (3.8-4.4)  | 237 | <0.001 |
| 12 | mEq/L, Median (IQR)         |                |     |                |     |        |
| 13 | Serum Creatinine -          | 1.5 (0.94-2.4) | 114 | 0.8 (0.7-1.1)  | 261 | <0.001 |
| 14 | mg/dL, Median (IQR)         |                |     |                |     |        |
| 15 | Aspartate                   | 62 (36.2-105)  | 106 | 35 (26-54.5)   | 236 | <0.001 |
| 16 | aminotransferase -          |                |     |                |     |        |
| 17 | U/L, Median (IQR)           |                |     |                |     |        |
| 18 | Alanine                     | 28 (16-54)     | 56  | 28 (19-52)     | 215 | 0.514  |
| 19 | aminotransferase -          |                |     |                |     |        |
| 20 | U/L, Median (IQR)           |                |     |                |     |        |
| 21 | Serum Albumin -             | 2.7 (2.3-3.2)  | 107 | 3.3 (2.9-3.6)  | 236 | <0.001 |
| 22 | g/dL, Median (IQR)          |                |     |                |     |        |
| 23 | Venous lactate -            | 1.55 (1.02-    | 34  | 1.3 (1.1-1.7)  | 49  | 0.157  |
| 24 | mmol/L, Median              | 2.15)          |     |                |     |        |
| 25 | (IQR)                       |                |     |                |     |        |
| 26 | Number of                   | 19 (56)        | 34  | 20 (41)        | 49  | 0.157  |
| 27 | patients >1.5 mmol/L,       |                |     |                |     |        |
| 28 | n (%)                       |                |     |                |     |        |
| 29 | <b>Inflammatory Markers</b> |                |     |                |     |        |
| 30 | C-Reactive Protein          | 220 (113-297)  | 80  | 75.6 (36.2-    | 182 | <0.001 |
| 31 | - mg/L, Median (IQR)        |                |     | 134)           |     |        |
| 32 | Ferritin -ng/L,             | 920 (470-      | 76  | 503 (266-      | 187 | <0.001 |
| 33 | Median (IQR)                | 2220)          |     | 1020)          |     |        |
| 34 | Procalcitonin -             | 1.02 (0.20-    | 58  | 0.08 (0.05-    | 163 | <0.001 |
| 35 | ng/mL, Median (IQR)         | 4.5)           |     | 0.22)          |     |        |
| 36 | Number of                   | 34 (59)        | 58  | 17 (10)        | 163 | <0.001 |
| 37 | patients >0.49 ng/mL,       |                |     |                |     |        |
| 38 | n (%)                       |                |     |                |     |        |

|    |                       |               |    |                |     |        |
|----|-----------------------|---------------|----|----------------|-----|--------|
| 1  | Number of             |               |    |                |     |        |
| 2  | patients <0.15 ng/mL, | 11 (19)       | 58 | 106 (65)       | 163 | <0.001 |
| 3  | n (%)                 |               |    |                |     |        |
| 4  | Lactate               |               |    |                |     |        |
| 5  | Dehydrogenase -U/L,   | 513 (399-729) | 67 | 333 (274-422)  | 188 | <0.001 |
| 6  | Median (IQR)          |               |    |                |     |        |
| 7  |                       |               |    |                |     |        |
| 8  | Creatinine Kinase -   | 659 (305-     | 42 | 146 (60-268)   | 73  | <0.001 |
| 9  | U/L, Median (IQR)     | 1450)         |    |                |     |        |
| 10 |                       |               |    |                |     |        |
| 11 | D-Dimer -µg/mL,       | 2.7 (1.6-5.8) | 57 | 0.83 (0.5-1.6) | 127 | <0.001 |
| 12 | Median (IQR)          |               |    |                |     |        |
| 13 |                       |               |    |                |     |        |
| 14 |                       |               |    |                |     |        |
| 15 |                       |               |    |                |     |        |
| 16 | Number of             |               |    |                |     |        |
| 17 | patients >2.0 µg/mL,  | 36 (63)       | 57 | 28 (22)        | 127 | <0.001 |
| 18 | n (%)                 |               |    |                |     |        |
| 19 |                       |               |    |                |     |        |

20  
21  
22  
23  
24 All values are closest values in twenty-four hours prior to ICU admission. All continuous  
25 characteristics are in Median (Interquartile Range) unless specified otherwise and all categorical  
26 characteristics are in number (percentage). The percentage is calculated with the number of patients  
27 who had the characteristic available as the denominator. For further clarity, the number in which that  
28 characteristic was available for is provided separately in adjacent column.  
29  
30  
31  
32  
33  
34  
35  
36  
37  
38  
39  
40  
41  
42  
43  
44  
45  
46  
47  
48  
49  
50  
51  
52  
53  
54  
55  
56  
57  
58  
59  
60

## References

1. COVID-19 Map [Internet]. 2020. Available from: <https://coronavirus.jhu.edu/map.html>
2. Guan W, Ni Z, Hu Y, et al. Clinical Characteristics of Coronavirus Disease 2019 in China. *N Engl J Med* 2020;
3. Gupta A, Madhavan M V., Sehgal K, et al. Extrapulmonary manifestations of COVID-19. *Nat. Med.* 2020;
4. Fisher M, Neugarten J, Bellin E, et al. AKI in Hospitalized Patients with and without COVID-19: A Comparison Study. *J Am Soc Nephrol* 2020;
5. Chan L, Chaudhary K, Saha A, et al. AKI in Hospitalized Patients with COVID-19. *J Am Soc Nephrol* [Internet] 2020;ASN.2020050615. Available from: <http://jasn.asnjournals.org/content/early/2020/09/02/ASN.2020050615.abstract>
6. Lala A, Johnson KW, Januzzi JL, et al. Prevalence and Impact of Myocardial Injury in Patients Hospitalized With COVID-19 Infection. *J Am Coll Cardiol* 2020;
7. Paranjpe I, Fuster V, Lala A, et al. Association of Treatment Dose Anticoagulation With In-Hospital Survival Among Hospitalized Patients With COVID-19. *J. Am. Coll. Cardiol.* 2020;
8. Menter T, Haslbauer JD, Nienhold R, et al. Postmortem examination of COVID-19 patients reveals diffuse alveolar damage with severe capillary congestion and variegated findings in lungs and other organs suggesting vascular dysfunction. *Histopathology* 2020;
9. Zhang Y, Xiao M, Zhang S, et al. Coagulopathy and Antiphospholipid Antibodies in Patients with Covid-19. *N Engl J Med* 2020;
10. Yin S, Huang M, Li D, Tang N. Difference of coagulation features between severe pneumonia induced by SARS-CoV2 and non-SARS-CoV2. *J Thromb Thrombolysis* 2020;
11. Bilaloglu S, Aphinyanaphongs Y, Jones S, Iturrate E, Hochman J, Berger JS. Thrombosis in Hospitalized Patients with COVID-19 in a New York City Health System. *JAMA - J. Am. Med. Assoc.* 2020;
12. Grasselli G, Zangrillo A, Zanella A, et al. Baseline Characteristics and Outcomes of 1591 Patients Infected With SARS-CoV-2 Admitted to ICUs of the Lombardy Region, Italy. *JAMA* [Internet] 2020; Available from: <https://doi.org/10.1001/jama.2020.5394>
13. Yang X, Yu Y, Xu J, et al. Clinical course and outcomes of critically ill patients with SARS-CoV-2 pneumonia in Wuhan, China: a single-centered, retrospective, observational study. *Lancet Respir Med* 2020;
14. Vena A, Giacobbe DR, Di Biagio A, et al. Clinical characteristics, management and in-hospital mortality of patients with coronavirus disease 2019 in Genoa, Italy. *Clin Microbiol Infect* 2020;
15. States Reporting Cases of COVID-19 to CDC [Internet]. 2020. Available from: <https://www.cdc.gov/coronavirus/2019-ncov/cases-updates/cases-in-us.html>
16. Lipsitch M, Swerdlow DL, Finelli L. Defining the Epidemiology of Covid-19 - Studies Needed. *N Engl J Med* 2020;

17. R Core Team. R Core Team (2017). R: A language and environment for statistical computing. R Found Stat Comput Vienna, Austria URL <http://www.R-project.org/> 2017; R Foundation for Statistical Computing.
18. McMichael TM, Currie DW, Clark S, et al. Epidemiology of Covid-19 in a Long-Term Care Facility in King County, Washington. *N Engl J Med* 2020;
19. Ng O-T, Marimuthu K, Chia P-Y, et al. SARS-CoV-2 Infection among Travelers Returning from Wuhan, China. *N Engl J Med* 2020;
20. Holshue ML, DeBolt C, Lindquist S, et al. First case of 2019 novel coronavirus in the United States. *N Engl J Med* 2020;
21. Verity R, Okell LC, Dorigatti I, et al. Estimates of the severity of coronavirus disease 2019 : a model-based analysis. *Lancet Infect Dis* 2020;
22. Zhou F, Yu T, Du R, et al. Clinical course and risk factors for mortality of adult inpatients with COVID-19 in Wuhan, China: a retrospective cohort study. *Lancet* 2020;
23. Bhatraju PK, Ghassemieh BJ, Nichols M, et al. Covid-19 in Critically Ill Patients in the Seattle Region - Case Series. *N Engl J Med* 2020;
24. CDC C. The Novel Coronavirus Pneumonia Emergency Response Epidemiology Team. The epidemiological characteristics of an outbreak of 2019 novel coronavirus disease (COVID-19). 2020.
25. Arentz M, Yim E, Klaff L, et al. Characteristics and Outcomes of 21 Critically Ill Patients with COVID-19 in Washington State. *JAMA - J. Am. Med. Assoc.* 2020;
26. Han Y, Zhang H, Mu S, et al. Lactate dehydrogenase, a Risk Factor of Severe COVID-19 Patients. *medRxiv [Internet]* 2020;2020.03.24.20040162. Available from: <http://medrxiv.org/content/early/2020/03/27/2020.03.24.20040162.abstract>
27. Lippi G, Plebani M. Procalcitonin in patients with severe coronavirus disease 2019 (COVID-19): A meta-analysis. *Clin. Chim. Acta.* 2020;
28. Goyal P, Choi JJ, Pinheiro LC, et al. Clinical characteristics of COVID-19 in New York City. *N. Engl. J. Med.* 2020;
29. Lauer SA, Grantz KH, Bi Q, et al. The Incubation Period of Coronavirus Disease 2019 (COVID-19) From Publicly Reported Confirmed Cases: Estimation and Application. *Ann Intern Med* 2020;

#### Author Contributions:

I.P., A.J.R., J.F.D., A.L., M.S., A.V., K.W.J, S.S., A.K., R.O., S.M., U.N., S.J., A.K., P.T., J.J., A.F. developed and performed the analysis. P.G., M.A.L., J.F., J.A.A., E.B., C.R.H., B.M., Z.F. critically appraised the manuscript and helped acquire data. I.P., A.L., A.J.R., J.F.D., R.M., M.D., E.G., D.M., P.F.O., L.M.H., R.F., M.S., P.K., V.F., E.P.B., J.N., E.J.N. C.C., D.S.C., D.L.R., Z.F. supervised the project I.P., A.L., A.J.R., J.F.D., G.N.N, B.S.G, A.W.C, A.C.J drafted the manuscript.



## Competing Interests

Dr. Nadkarni reports grants, personal fees and non-financial support from Renalytix AI, non-financial support from Pensieve Health, personal fees from AstraZeneca, personal fees from AstraZeneca, personal fees from BioVie, personal fees from GLG Consulting, from outside the submitted work. Dr. Lala reports personal fees from Zoll, outside the submitted work. Dr. Fayad reports grants from Daiichi Sankyo, grants from Amgen, grants from Bristol Myers Squibb, from Siemens Healthineers, personal fees from Alexion, personal fees from GlaxoSmithKline, personal fees from Trained Therapeutix Discovery, outside the submitted work. In addition, Dr. Fayad has patents licensed to Trained Therapeutix Discovery. The other authors have nothing to disclose.

For peer review only

### Patients Admitted per Day



### Admitted, Discharged, and Hospitalized Patients





## Supplementary Material

### Supplementary Methods

#### Mount Sinai Covid Informatics Center (MSCIC) Data Platform

This dataset of clinical data is the first part of a larger effort that aims to create an heterogeneous collection of COVID-19 patient data. This effort brings together different stakeholders from MSHS, including research faculty, data scientists, clinicians, and hospital administrators, among others. The resulting dataset includes or will include longitudinal electronic health record (EHR) patient clinical data, multi-omics, such as genomics, imaging, such as chest CT scans, among others. The data, which are updated on a daily basis, is made available within a secure computational framework based on internal Microsoft Azure Cloud to researchers and analysts within the MSHS and the Icahn School of Medicine at Mount Sinai. This dataset is intended to foster research projects to improve the knowledge of this disease and augment clinical operations with machine intelligence.

#### Supplementary Figures



**Supplementary Figure 1:** Flowchart of patients included in study cohort. All patients had a confirmed COVID-19 qPCR from a nasopharyngeal swab. Patients were stratified by completion of hospital course.



**Supplementary Figure 2** Trends in laboratory test orders per day. Tests that comprised the Mount Sinai Health System COVID-19 special order (C-reactive protein, d-dimer, ferritin, hemoglobin, lactate dehydrogenase, procalcitonin) set were included. Number of orders of hemoglobin were also included as a comparison. We only included dates in which there were at least 10 COVID-19 patients admitted (i.e., 03/10/2020). We included data up to 04/01/2020 to leave a full 24 hours for the tests to be ordered.

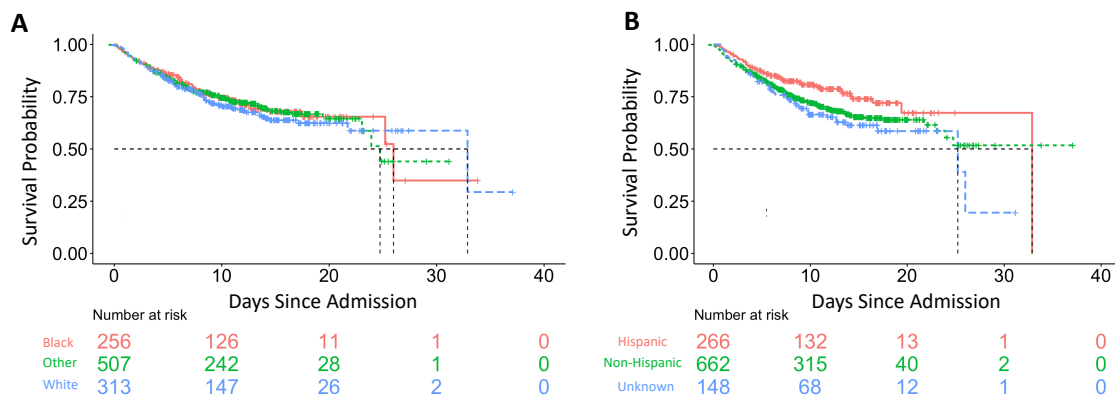

**Supplementary Figure 3** Kaplan Meier curve stratified by A) self-reported race and B) ethnicity. Individuals were censored if they were hospitalized at the time of data-freeze.

**Supplementary Table 1** Diagnostic codes used to identify clinical comorbidities. Patients were determined to have a history of a clinical condition if they had at least one diagnostic code for the specific condition in their electronic health record.

| DIAGNOSIS           | CODE   | TYPE  | DESCRIPTION                                            |
|---------------------|--------|-------|--------------------------------------------------------|
| Atrial fibrillation | 427.3  | ICD9  | Atrial fibrillation and flutter                        |
| Atrial fibrillation | 427.31 | ICD9  | Atrial fibrillation                                    |
| Atrial fibrillation | 427.32 | ICD9  | Atrial flutter                                         |
| Atrial fibrillation | I48    | ICD10 | Atrial fibrillation and flutter                        |
| Atrial fibrillation | I48.0  | ICD10 | Paroxysmal atrial fibrillation                         |
| Atrial fibrillation | I48.1  | ICD10 | Persistent atrial fibrillation                         |
| Atrial fibrillation | I48.2  | ICD10 | Chronic atrial fibrillation                            |
| Atrial fibrillation | I48.3  | ICD10 | Typical atrial flutter                                 |
| Atrial fibrillation | I48.4  | ICD10 | Atypical atrial flutter                                |
| Atrial fibrillation | I48.91 | ICD10 | Unspecified atrial fibrillation                        |
| Atrial fibrillation | I48.92 | ICD10 | Unspecified atrial flutter                             |
| Asthma              | 493    | ICD9  | Asthma                                                 |
| Asthma              | 493    | ICD9  | Extrinsic asthma                                       |
| Asthma              | 493    | ICD9  | Extrinsic asthma without mention of status asthmaticus |
| Asthma              | 493.01 | ICD9  | Extrinsic asthma with status asthmaticus               |
| Asthma              | 493.02 | ICD9  | Extrinsic asthma with acute exacerbation               |
| Asthma              | 493.1  | ICD9  | Intrinsic asthma                                       |
| Asthma              | 493.1  | ICD9  | Intrinsic asthma without mention of status asthmaticus |
| Asthma              | 493.11 | ICD9  | Intrinsic asthma with status asthmaticus               |
| Asthma              | 493.12 | ICD9  | Intrinsic asthma with acute exacerbation               |
| Asthma              | 493.2  | ICD9  | Chronic obstructive asthma                             |
| Asthma              | 493.2  | ICD9  | Chronic obstructive asthma                             |
| Asthma              | 493.21 | ICD9  | Chronic obstructive asthma                             |
| Asthma              | 493.22 | ICD9  | Chronic obstructive asthma                             |
| Asthma              | 493.8  | ICD9  | Other forms of asthma                                  |
| Asthma              | 493.81 | ICD9  | Exercise induced bronchospasm                          |
| Asthma              | 493.82 | ICD9  | Cough variant asthma                                   |
| Asthma              | 493.9  | ICD9  | Asthma                                                 |
| Asthma              | 493.9  | ICD9  | Asthma                                                 |
| Asthma              | 493.91 | ICD9  | Asthma                                                 |
| Asthma              | 493.92 | ICD9  | Asthma                                                 |
| Asthma              | J45.0  | ICD10 | Asthma                                                 |
| Asthma              | J45.20 | ICD10 | Mild intermittent asthma                               |
| Asthma              | J45.21 | ICD10 | Mild intermittent asthma with (acute) exacerbation     |
| Asthma              | J45.22 | ICD10 | Mild intermittent asthma with status asthmaticus       |

|                         |         |       |                                                                   |
|-------------------------|---------|-------|-------------------------------------------------------------------|
| Asthma                  | J45.30  | ICD10 | Mild persistent asthma                                            |
| Asthma                  | J45.31  | ICD10 | Mild persistent asthma with (acute) exacerbation                  |
| Asthma                  | J45.32  | ICD10 | Mild persistent asthma with status asthmaticus                    |
| Asthma                  | J45.40  | ICD10 | Moderate persistent asthma                                        |
| Asthma                  | J45.41  | ICD10 | Moderate persistent asthma with (acute) exacerbation              |
| Asthma                  | J45.42  | ICD10 | Moderate persistent asthma with status asthmaticus                |
| Asthma                  | J45.50  | ICD10 | Severe persistent asthma                                          |
| Asthma                  | J45.51  | ICD10 | Severe persistent asthma with (acute) exacerbation                |
| Asthma                  | J45.52  | ICD10 | Severe persistent asthma with status asthmaticus                  |
| Asthma                  | J45.90  | ICD10 | Unspecified asthma                                                |
| Asthma                  | J45.901 | ICD10 | Unspecified asthma with (acute) exacerbation                      |
| Asthma                  | J45.902 | ICD10 | Unspecified asthma with status asthmaticus                        |
| Asthma                  | J45.909 | ICD10 | Unspecified asthma                                                |
| Asthma                  | J45.990 | ICD10 | Exercise induced bronchospasm                                     |
| Asthma                  | J45.991 | ICD10 | Cough variant asthma                                              |
| Asthma                  | J45.998 | ICD10 | Other asthma                                                      |
| Coronary artery disease | 411.81  | ICD9  | Acute coronary occlusion without myocardial infarction            |
| Coronary artery disease | 414     | ICD9  | Coronary atherosclerosis                                          |
| Coronary artery disease | 414     | ICD9  | Coronary atherosclerosis of unspecified type of vessel            |
| Coronary artery disease | 414.01  | ICD9  | Coronary atherosclerosis of native coronary artery                |
| Coronary artery disease | 414.02  | ICD9  | Coronary atherosclerosis of autologous biological bypass graft    |
| Coronary artery disease | 414.03  | ICD9  | Coronary atherosclerosis of nonautologous biological bypass graft |
| Coronary artery disease | 414.04  | ICD9  | Coronary atherosclerosis of artery bypass graft                   |
| Coronary artery disease | 414.05  | ICD9  | Coronary atherosclerosis of unspecified type of bypass graft      |



|                         |        |      |                                                           |
|-------------------------|--------|------|-----------------------------------------------------------|
| Coronary artery disease | 414.2  | ICD9 | Chronic total occlusion of coronary artery                |
| Coronary artery disease | 414.3  | ICD9 | Coronary atherosclerosis due to lipid rich plaque         |
| Coronary artery disease | 414.4  | ICD9 | Coronary atherosclerosis due to calcified coronary lesion |
| Coronary artery disease | 410    | ICD9 | Acute myocardial infarction                               |
| Coronary artery disease | 410    | ICD9 | Acute myocardial infarction                               |
| Coronary artery disease | 410    | ICD9 | Acute myocardial infarction                               |
| Coronary artery disease | 410.01 | ICD9 | Acute myocardial infarction                               |
| Coronary artery disease | 410.02 | ICD9 | Acute myocardial infarction                               |
| Coronary artery disease | 410.1  | ICD9 | Acute myocardial infarction                               |
| Coronary artery disease | 410.1  | ICD9 | Acute myocardial infarction                               |
| Coronary artery disease | 410.11 | ICD9 | Acute myocardial infarction                               |
| Coronary artery disease | 410.12 | ICD9 | Acute myocardial infarction                               |
| Coronary artery disease | 410.2  | ICD9 | Acute myocardial infarction                               |
| Coronary artery disease | 410.2  | ICD9 | Acute myocardial infarction                               |
| Coronary artery disease | 410.21 | ICD9 | Acute myocardial infarction                               |
| Coronary artery disease | 410.22 | ICD9 | Acute myocardial infarction                               |
| Coronary artery disease | 410.3  | ICD9 | Acute myocardial infarction                               |
| Coronary artery disease | 410.3  | ICD9 | Acute myocardial infarction                               |
| Coronary artery disease | 410.31 | ICD9 | Acute myocardial infarction                               |
| Coronary artery disease | 410.32 | ICD9 | Acute myocardial infarction                               |

|                         |        |      |                             |
|-------------------------|--------|------|-----------------------------|
| Coronary artery disease | 410.4  | ICD9 | Acute myocardial infarction |
| Coronary artery disease | 410.4  | ICD9 | Acute myocardial infarction |
| Coronary artery disease | 410.41 | ICD9 | Acute myocardial infarction |
| Coronary artery disease | 410.42 | ICD9 | Acute myocardial infarction |
| Coronary artery disease | 410.5  | ICD9 | Acute myocardial infarction |
| Coronary artery disease | 410.5  | ICD9 | Acute myocardial infarction |
| Coronary artery disease | 410.51 | ICD9 | Acute myocardial infarction |
| Coronary artery disease | 410.52 | ICD9 | Acute myocardial infarction |
| Coronary artery disease | 410.6  | ICD9 | Acute myocardial infarction |
| Coronary artery disease | 410.6  | ICD9 | Acute myocardial infarction |
| Coronary artery disease | 410.61 | ICD9 | Acute myocardial infarction |
| Coronary artery disease | 410.62 | ICD9 | Acute myocardial infarction |
| Coronary artery disease | 410.7  | ICD9 | Acute myocardial infarction |
| Coronary artery disease | 410.7  | ICD9 | Acute myocardial infarction |
| Coronary artery disease | 410.71 | ICD9 | Acute myocardial infarction |
| Coronary artery disease | 410.72 | ICD9 | Acute myocardial infarction |
| Coronary artery disease | 410.8  | ICD9 | Acute myocardial infarction |
| Coronary artery disease | 410.8  | ICD9 | Acute myocardial infarction |
| Coronary artery disease | 410.81 | ICD9 | Acute myocardial infarction |
| Coronary artery disease | 410.82 | ICD9 | Acute myocardial infarction |

|                         |         |       |                                                                                                    |
|-------------------------|---------|-------|----------------------------------------------------------------------------------------------------|
| Coronary artery disease | 410.9   | ICD9  | Acute myocardial infarction                                                                        |
| Coronary artery disease | 410.9   | ICD9  | Acute myocardial infarction                                                                        |
| Coronary artery disease | 410.91  | ICD9  | Acute myocardial infarction                                                                        |
| Coronary artery disease | 410.92  | ICD9  | Acute myocardial infarction                                                                        |
| Coronary artery disease | 411     | ICD9  | Postmyocardial infarction syndrome                                                                 |
| Coronary artery disease | 412     | ICD9  | Old myocardial infarction                                                                          |
| Coronary artery disease | 429.7   | ICD9  | Certain sequelae of myocardial infarction                                                          |
| Coronary artery disease | 429.71  | ICD9  | Cardiac septal defect                                                                              |
| Coronary artery disease | 429.79  | ICD9  | Other sequelae of myocardial infarction                                                            |
| Coronary artery disease | I24.0   | ICD10 | Acute coronary thrombosis not resulting in myocardial infarction                                   |
| Coronary artery disease | I25.1   | ICD10 | Atherosclerotic heart disease of native coronary artery                                            |
| Coronary artery disease | I25.10  | ICD10 | Atherosclerotic heart disease of native coronary artery without angina pectoris                    |
| Coronary artery disease | I25.110 | ICD10 | Atherosclerotic heart disease of native coronary artery with unstable angina pectoris              |
| Coronary artery disease | I25.111 | ICD10 | Atherosclerotic heart disease of native coronary artery with angina pectoris with documented spasm |
| Coronary artery disease | I25.118 | ICD10 | Atherosclerotic heart disease of native coronary artery with other forms of angina pectoris        |
| Coronary artery disease | I25.119 | ICD10 | Atherosclerotic heart disease of native coronary artery with unspecified angina pectoris           |
| Coronary artery disease | I25.700 | ICD10 | Atherosclerosis of coronary artery bypass graft(s)                                                 |
| Coronary artery disease | I25.701 | ICD10 | Atherosclerosis of coronary artery bypass graft(s)                                                 |

|                         |         |       |                                                                                                                 |
|-------------------------|---------|-------|-----------------------------------------------------------------------------------------------------------------|
| Coronary artery disease | I25.708 | ICD10 | Atherosclerosis of coronary artery bypass graft(s)                                                              |
| Coronary artery disease | I25.709 | ICD10 | Atherosclerosis of coronary artery bypass graft(s)                                                              |
| Coronary artery disease | I25.710 | ICD10 | Atherosclerosis of autologous vein coronary artery bypass graft(s) with unstable angina pectoris                |
| Coronary artery disease | I25.711 | ICD10 | Atherosclerosis of autologous vein coronary artery bypass graft(s) with angina pectoris with documented spasm   |
| Coronary artery disease | I25.718 | ICD10 | Atherosclerosis of autologous vein coronary artery bypass graft(s) with other forms of angina pectoris          |
| Coronary artery disease | I25.719 | ICD10 | Atherosclerosis of autologous vein coronary artery bypass graft(s) with unspecified angina pectoris             |
| Coronary artery disease | I25.720 | ICD10 | Atherosclerosis of autologous artery coronary artery bypass graft(s) with unstable angina pectoris              |
| Coronary artery disease | I25.721 | ICD10 | Athscl autologous artery CABG w ang pctrs w documented spasm                                                    |
| Coronary artery disease | I25.728 | ICD10 | Atherosclerosis of autologous artery coronary artery bypass graft(s) with other forms of angina pectoris        |
| Coronary artery disease | I25.729 | ICD10 | Atherosclerosis of autologous artery coronary artery bypass graft(s) with unspecified angina pectoris           |
| Coronary artery disease | I25.730 | ICD10 | Atherosclerosis of nonautologous biological coronary artery bypass graft(s) with unstable angina pectoris       |
| Coronary artery disease | I25.731 | ICD10 | Athscl nonaut biological CABG w ang pctrs w documented spasm                                                    |
| Coronary artery disease | I25.738 | ICD10 | Atherosclerosis of nonautologous biological coronary artery bypass graft(s) with other forms of angina pectoris |
| Coronary artery disease | I25.739 | ICD10 | Atherosclerosis of nonautologous biological coronary artery bypass graft(s) with unspecified angina pectoris    |
| Coronary artery disease | I25.790 | ICD10 | Atherosclerosis of other coronary artery bypass graft(s) with unstable angina pectoris                          |

|                         |         |       |                                                                                                     |
|-------------------------|---------|-------|-----------------------------------------------------------------------------------------------------|
| Coronary artery disease | I25.791 | ICD10 | Atherosclerosis of other coronary artery bypass graft(s) with angina pectoris with documented spasm |
| Coronary artery disease | I25.798 | ICD10 | Atherosclerosis of other coronary artery bypass graft(s) with other forms of angina pectoris        |
| Coronary artery disease | I25.799 | ICD10 | Atherosclerosis of other coronary artery bypass graft(s) with unspecified angina pectoris           |
| Coronary artery disease | I25.810 | ICD10 | Atherosclerosis of coronary artery bypass graft(s) without angina pectoris                          |
| Coronary artery disease | I25.82  | ICD10 | Chronic total occlusion of coronary artery                                                          |
| Coronary artery disease | I25.83  | ICD10 | Coronary atherosclerosis due to lipid rich plaque                                                   |
| Coronary artery disease | I25.84  | ICD10 | Coronary atherosclerosis due to calcified coronary lesion                                           |
| Coronary artery disease | I21     | ICD10 | Acute myocardial infarction                                                                         |
| Coronary artery disease | I23.1   | ICD10 | Atrial septal defect as current complication following acute myocardial infarction                  |
| Coronary artery disease | I51.0   | ICD10 | Cardiac septal defect                                                                               |
| Coronary artery disease | I24.1   | ICD10 | Dressler's syndrome                                                                                 |
| Coronary artery disease | I23.0   | ICD10 | Hemopericardium as current complication following acute myocardial infarction                       |
| Coronary artery disease | I51.3   | ICD10 | Intracardiac thrombosis                                                                             |
| Coronary artery disease | I21.9   | ICD10 | Myocardial infarction (acute) NOS                                                                   |
| Coronary artery disease | I21.A1  | ICD10 | Myocardial infarction type 2                                                                        |
| Coronary artery disease | I21.4   | ICD10 | Non-ST elevation (NSTEMI) myocardial infarction                                                     |
| Coronary artery disease | I25.2   | ICD10 | Old myocardial infarction                                                                           |

|                         |        |       |                                                                                                               |
|-------------------------|--------|-------|---------------------------------------------------------------------------------------------------------------|
| Coronary artery disease | I23.8  | ICD10 | Other current complications following acute myocardial infarction                                             |
| Coronary artery disease | I21.A9 | ICD10 | Other myocardial infarction type                                                                              |
| Coronary artery disease | I21.A  | ICD10 | Other type of myocardial infarction                                                                           |
| Coronary artery disease | I23.7  | ICD10 | Postinfarction angina                                                                                         |
| Coronary artery disease | I23.3  | ICD10 | Rupture of cardiac wall without hemopericardium as current complication following acute myocardial infarction |
| Coronary artery disease | I21.02 | ICD10 | ST elevation (STEMI) myocardial infarction involving left anterior descending coronary artery                 |
| Coronary artery disease | I21.21 | ICD10 | ST elevation (STEMI) myocardial infarction involving left circumflex coronary artery                          |
| Coronary artery disease | I21.01 | ICD10 | ST elevation (STEMI) myocardial infarction involving left main coronary artery                                |
| Coronary artery disease | I21.09 | ICD10 | ST elevation (STEMI) myocardial infarction involving other coronary artery of anterior wall                   |
| Coronary artery disease | I21.19 | ICD10 | ST elevation (STEMI) myocardial infarction involving other coronary artery of inferior wall                   |
| Coronary artery disease | I21.29 | ICD10 | ST elevation (STEMI) myocardial infarction involving other sites                                              |
| Coronary artery disease | I21.11 | ICD10 | ST elevation (STEMI) myocardial infarction involving right coronary artery                                    |
| Coronary artery disease | I21.0  | ICD10 | ST elevation (STEMI) myocardial infarction of anterior wall                                                   |
| Coronary artery disease | I21.1  | ICD10 | ST elevation (STEMI) myocardial infarction of inferior wall                                                   |
| Coronary artery disease | I21.2  | ICD10 | ST elevation (STEMI) myocardial infarction of other sites                                                     |
| Coronary artery disease | I21.3  | ICD10 | ST elevation (STEMI) myocardial infarction of unspecified site                                                |

|                         |       |       |                                                                                         |
|-------------------------|-------|-------|-----------------------------------------------------------------------------------------|
| Coronary artery disease | I22.2 | ICD10 | Subsequent non-ST elevation (NSTEMI) myocardial infarction                              |
| Coronary artery disease | I22   | ICD10 | Subsequent ST elevation (STEMI) and non-ST elevation (NSTEMI) myocardial infarction     |
| Coronary artery disease | I22.0 | ICD10 | Subsequent ST elevation (STEMI) myocardial infarction of anterior wall                  |
| Coronary artery disease | I22.1 | ICD10 | Subsequent ST elevation (STEMI) myocardial infarction of inferior wall                  |
| Coronary artery disease | I22.8 | ICD10 | Subsequent ST elevation (STEMI) myocardial infarction of other sites                    |
| Coronary artery disease | I22.9 | ICD10 | Subsequent ST elevation (STEMI) myocardial infarction of unspecified site               |
| Coronary artery disease | I23.6 | ICD10 | Thrombosis of atrium                                                                    |
| Coronary artery disease | I23.2 | ICD10 | Ventricular septal defect as current complication following acute myocardial infarction |
| Cancer                  | 140   | ICD9  | Malignant neoplasm of lip                                                               |
| Cancer                  | 140   | ICD9  | Malignant neoplasm of upper lip                                                         |
| Cancer                  | 140.1 | ICD9  | Malignant neoplasm of lower lip                                                         |
| Cancer                  | 140.3 | ICD9  | Malignant neoplasm of upper lip                                                         |
| Cancer                  | 140.4 | ICD9  | Malignant neoplasm of lower lip                                                         |
| Cancer                  | 140.5 | ICD9  | Malignant neoplasm of lip                                                               |
| Cancer                  | 140.6 | ICD9  | Malignant neoplasm of commissure of lip                                                 |
| Cancer                  | 140.8 | ICD9  | Malignant neoplasm of other sites of lip                                                |
| Cancer                  | 140.9 | ICD9  | Malignant neoplasm of lip                                                               |
| Cancer                  | 141   | ICD9  | Malignant neoplasm of tongue                                                            |
| Cancer                  | 141   | ICD9  | Malignant neoplasm of base of tongue                                                    |
| Cancer                  | 141.1 | ICD9  | Malignant neoplasm of dorsal surface of tongue                                          |
| Cancer                  | 141.2 | ICD9  | Malignant neoplasm of tip and lateral border of tongue                                  |
| Cancer                  | 141.3 | ICD9  | Malignant neoplasm of ventral surface of tongue                                         |
| Cancer                  | 141.4 | ICD9  | Malignant neoplasm of anterior two-thirds of tongue                                     |
| Cancer                  | 141.5 | ICD9  | Malignant neoplasm of junctional zone of tongue                                         |

|        |       |      |                                                            |
|--------|-------|------|------------------------------------------------------------|
| Cancer | 141.6 | ICD9 | Malignant neoplasm of lingual tonsil                       |
|        |       |      | Malignant neoplasm of other sites of tongue                |
| Cancer | 141.8 | ICD9 | Malignant neoplasm of tongue                               |
| Cancer | 141.9 | ICD9 | Malignant neoplasm of tongue                               |
|        |       |      | Malignant neoplasm of major salivary glands                |
| Cancer | 142   | ICD9 | Malignant neoplasm of parotid gland                        |
|        |       |      | Malignant neoplasm of submandibular gland                  |
| Cancer | 142.1 | ICD9 | Malignant neoplasm of sublingual gland                     |
| Cancer | 142.2 | ICD9 | Malignant neoplasm of other major salivary glands          |
| Cancer | 142.8 | ICD9 | Malignant neoplasm of salivary gland                       |
| Cancer | 142.9 | ICD9 | Malignant neoplasm of gum                                  |
| Cancer | 143   | ICD9 | Malignant neoplasm of upper gum                            |
| Cancer | 143   | ICD9 | Malignant neoplasm of lower gum                            |
|        |       |      | Malignant neoplasm of other sites of gum                   |
| Cancer | 143.8 | ICD9 | Malignant neoplasm of gum                                  |
| Cancer | 143.9 | ICD9 | Malignant neoplasm of floor of mouth                       |
| Cancer | 144   | ICD9 | Malignant neoplasm of anterior portion of floor of mouth   |
|        |       |      | Malignant neoplasm of lateral portion of floor of mouth    |
| Cancer | 144.1 | ICD9 | Malignant neoplasm of other sites of floor of mouth        |
| Cancer | 144.8 | ICD9 | Malignant neoplasm of floor of mouth                       |
| Cancer | 144.9 | ICD9 | Malignant neoplasm of other and unspecified parts of mouth |
| Cancer | 145   | ICD9 | Malignant neoplasm of cheek mucosa                         |
|        |       |      | Malignant neoplasm of vestibule of mouth                   |
| Cancer | 145.1 | ICD9 | Malignant neoplasm of hard palate                          |
| Cancer | 145.2 | ICD9 | Malignant neoplasm of soft palate                          |
| Cancer | 145.3 | ICD9 | Malignant neoplasm of uvula                                |
| Cancer | 145.4 | ICD9 | Malignant neoplasm of palate                               |
| Cancer | 145.5 | ICD9 | Malignant neoplasm of retromolar area                      |
|        |       |      | Malignant neoplasm of other specified parts of mouth       |
| Cancer | 145.8 | ICD9 | Malignant neoplasm of mouth                                |
| Cancer | 145.9 | ICD9 | Malignant neoplasm of mouth                                |



|        |       |      |                                                                |
|--------|-------|------|----------------------------------------------------------------|
| Cancer | 146   | ICD9 | Malignant neoplasm of oropharynx                               |
| Cancer | 146   | ICD9 | Malignant neoplasm of tonsil                                   |
| Cancer | 146.1 | ICD9 | Malignant neoplasm of tonsillar fossa                          |
| Cancer | 146.2 | ICD9 | Malignant neoplasm of tonsillar pillars (anterior) (posterior) |
| Cancer | 146.3 | ICD9 | Malignant neoplasm of vallecula                                |
| Cancer | 146.4 | ICD9 | Malignant neoplasm of anterior aspect of epiglottis            |
| Cancer | 146.5 | ICD9 | Malignant neoplasm of junctional region of oropharynx          |
| Cancer | 146.6 | ICD9 | Malignant neoplasm of lateral wall of oropharynx               |
| Cancer | 146.7 | ICD9 | Malignant neoplasm of posterior wall of oropharynx             |
| Cancer | 146.8 | ICD9 | Malignant neoplasm of other specified sites of oropharynx      |
| Cancer | 146.9 | ICD9 | Malignant neoplasm of oropharynx                               |
| Cancer | 147   | ICD9 | Malignant neoplasm of nasopharynx                              |
| Cancer | 147   | ICD9 | Malignant neoplasm of superior wall of nasopharynx             |
| Cancer | 147.1 | ICD9 | Malignant neoplasm of posterior wall of nasopharynx            |
| Cancer | 147.2 | ICD9 | Malignant neoplasm of lateral wall of nasopharynx              |
| Cancer | 147.3 | ICD9 | Malignant neoplasm of anterior wall of nasopharynx             |
| Cancer | 147.8 | ICD9 | Malignant neoplasm of other specified sites of nasopharynx     |
| Cancer | 147.9 | ICD9 | Malignant neoplasm of nasopharynx                              |
| Cancer | 148   | ICD9 | Malignant neoplasm of hypopharynx                              |
| Cancer | 148   | ICD9 | Malignant neoplasm of postcricoid region of hypopharynx        |
| Cancer | 148.1 | ICD9 | Malignant neoplasm of pyriform sinus                           |
| Cancer | 148.2 | ICD9 | Malignant neoplasm of aryepiglottic fold                       |
| Cancer | 148.3 | ICD9 | Malignant neoplasm of posterior hypopharyngeal wall            |
| Cancer | 148.8 | ICD9 | Malignant neoplasm of other specified sites of hypopharynx     |
| Cancer | 148.9 | ICD9 | Malignant neoplasm of hypopharynx                              |

|        |       |      |                                                                        |
|--------|-------|------|------------------------------------------------------------------------|
| Cancer | 149   | ICD9 | Malignant neoplasm of other and ill-defined sites within the lip       |
| Cancer | 149   | ICD9 | Malignant neoplasm of pharynx                                          |
| Cancer | 149.1 | ICD9 | Malignant neoplasm of waldeyer's ring                                  |
| Cancer | 149.8 | ICD9 | Malignant neoplasm of other sites within the lip and oral cavity       |
| Cancer | 149.9 | ICD9 | Malignant neoplasm of ill-defined sites within the lip and oral cavity |
| Cancer | 150   | ICD9 | Malignant neoplasm of esophagus                                        |
| Cancer | 150   | ICD9 | Malignant neoplasm of cervical esophagus                               |
| Cancer | 150.1 | ICD9 | Malignant neoplasm of thoracic esophagus                               |
| Cancer | 150.2 | ICD9 | Malignant neoplasm of abdominal esophagus                              |
| Cancer | 150.3 | ICD9 | Malignant neoplasm of upper third of esophagus                         |
| Cancer | 150.4 | ICD9 | Malignant neoplasm of middle third of esophagus                        |
| Cancer | 150.5 | ICD9 | Malignant neoplasm of lower third of esophagus                         |
| Cancer | 150.8 | ICD9 | Malignant neoplasm of other specified part of esophagus                |
| Cancer | 150.9 | ICD9 | Malignant neoplasm of esophagus                                        |
| Cancer | 151   | ICD9 | Malignant neoplasm of stomach                                          |
| Cancer | 151   | ICD9 | Malignant neoplasm of cardia                                           |
| Cancer | 151.1 | ICD9 | Malignant neoplasm of pylorus                                          |
| Cancer | 151.2 | ICD9 | Malignant neoplasm of pyloric antrum                                   |
| Cancer | 151.3 | ICD9 | Malignant neoplasm of fundus of stomach                                |
| Cancer | 151.4 | ICD9 | Malignant neoplasm of body of stomach                                  |
| Cancer | 151.5 | ICD9 | Malignant neoplasm of lesser curvature of stomach                      |
| Cancer | 151.6 | ICD9 | Malignant neoplasm of greater curvature of stomach                     |
| Cancer | 151.8 | ICD9 | Malignant neoplasm of other specified sites of stomach                 |
| Cancer | 151.9 | ICD9 | Malignant neoplasm of stomach                                          |
| Cancer | 153   | ICD9 | Malignant neoplasm of colon                                            |
| Cancer | 153   | ICD9 | Malignant neoplasm of hepatic flexure                                  |

|        |       |      |                                                                |
|--------|-------|------|----------------------------------------------------------------|
| Cancer | 153.1 | ICD9 | Malignant neoplasm of transverse colon                         |
| Cancer | 153.2 | ICD9 | Malignant neoplasm of descending colon                         |
| Cancer | 153.3 | ICD9 | Malignant neoplasm of sigmoid colon                            |
| Cancer | 153.4 | ICD9 | Malignant neoplasm of cecum                                    |
| Cancer | 153.5 | ICD9 | Malignant neoplasm of appendix vermiformis                     |
| Cancer | 153.6 | ICD9 | Malignant neoplasm of ascending colon                          |
| Cancer | 153.7 | ICD9 | Malignant neoplasm of splenic flexure                          |
| Cancer | 153.8 | ICD9 | Malignant neoplasm of other specified sites of large intestine |
| Cancer | 153.9 | ICD9 | Malignant neoplasm of colon                                    |
| Cancer | 154.8 | ICD9 | Malignant neoplasm of other sites of rectum                    |
| Cancer | 155   | ICD9 | Malignant neoplasm of liver and intrahepatic bile ducts        |
| Cancer | 155.1 | ICD9 | Malignant neoplasm of intrahepatic bile ducts                  |
| Cancer | 155.2 | ICD9 | Malignant neoplasm of liver                                    |
| Cancer | 157   | ICD9 | Malignant neoplasm of pancreas                                 |
| Cancer | 157   | ICD9 | Malignant neoplasm of head of pancreas                         |
| Cancer | 157.1 | ICD9 | Malignant neoplasm of body of pancreas                         |
| Cancer | 157.2 | ICD9 | Malignant neoplasm of tail of pancreas                         |
| Cancer | 157.3 | ICD9 | Malignant neoplasm of pancreatic duct                          |
| Cancer | 157.4 | ICD9 | Malignant neoplasm of islets of Langerhans                     |
| Cancer | 157.8 | ICD9 | Malignant neoplasm of other specified sites of pancreas        |
| Cancer | 157.9 | ICD9 | Malignant neoplasm of pancreas                                 |
| Cancer | 159   | ICD9 | Malignant neoplasm of intestinal tract                         |
| Cancer | 160   | ICD9 | Malignant neoplasm of nasal cavities                           |
| Cancer | 160   | ICD9 | Malignant neoplasm of nasal cavities                           |
| Cancer | 160.1 | ICD9 | Malignant neoplasm of auditory tube                            |
| Cancer | 160.2 | ICD9 | Malignant neoplasm of maxillary sinus                          |
| Cancer | 160.3 | ICD9 | Malignant neoplasm of ethmoidal sinus                          |
| Cancer | 160.4 | ICD9 | Malignant neoplasm of frontal sinus                            |
| Cancer | 160.5 | ICD9 | Malignant neoplasm of sphenoidal sinus                         |
| Cancer | 160.8 | ICD9 | Malignant neoplasm of other accessory sinuses                  |
| Cancer | 160.9 | ICD9 | Malignant neoplasm of accessory sinus                          |
| Cancer | 161   | ICD9 | Malignant neoplasm of larynx                                   |

|        |       |      |                                                                                                          |
|--------|-------|------|----------------------------------------------------------------------------------------------------------|
| Cancer | 161   | ICD9 | Malignant neoplasm of glottis                                                                            |
| Cancer | 161.1 | ICD9 | Malignant neoplasm of supraglottis                                                                       |
| Cancer | 161.2 | ICD9 | Malignant neoplasm of subglottis                                                                         |
| Cancer | 161.3 | ICD9 | Malignant neoplasm of laryngeal cartilages                                                               |
| Cancer | 161.8 | ICD9 | Malignant neoplasm of other specified sites of larynx                                                    |
| Cancer | 161.9 | ICD9 | Malignant neoplasm of larynx                                                                             |
| Cancer | 162   | ICD9 | Malignant neoplasm of trachea                                                                            |
| Cancer | 162   | ICD9 | Malignant neoplasm of trachea                                                                            |
| Cancer | 162.2 | ICD9 | Malignant neoplasm of main bronchus                                                                      |
| Cancer | 162.3 | ICD9 | Malignant neoplasm of upper lobe                                                                         |
| Cancer | 162.4 | ICD9 | Malignant neoplasm of middle lobe                                                                        |
| Cancer | 162.5 | ICD9 | Malignant neoplasm of lower lobe                                                                         |
| Cancer | 162.8 | ICD9 | Malignant neoplasm of other parts of bronchus or lung                                                    |
| Cancer | 162.9 | ICD9 | Malignant neoplasm of bronchus and lung                                                                  |
| Cancer | 163   | ICD9 | Malignant neoplasm of pleura                                                                             |
| Cancer | 163   | ICD9 | Malignant neoplasm of parietal pleura                                                                    |
| Cancer | 163.1 | ICD9 | Malignant neoplasm of visceral pleura                                                                    |
| Cancer | 163.8 | ICD9 | Malignant neoplasm of other specified sites of pleura                                                    |
| Cancer | 163.9 | ICD9 | Malignant neoplasm of pleura                                                                             |
| Cancer | 164   | ICD9 | Malignant neoplasm of thymus                                                                             |
| Cancer | 164   | ICD9 | Malignant neoplasm of thymus                                                                             |
| Cancer | 164.1 | ICD9 | Malignant neoplasm of heart                                                                              |
| Cancer | 164.2 | ICD9 | Malignant neoplasm of anterior mediastinum                                                               |
| Cancer | 164.3 | ICD9 | Malignant neoplasm of posterior mediastinum                                                              |
| Cancer | 164.8 | ICD9 | Malignant neoplasm of other parts of mediastinum                                                         |
| Cancer | 164.9 | ICD9 | Malignant neoplasm of mediastinum                                                                        |
| Cancer | 165   | ICD9 | Malignant neoplasm of other and ill-defined sites within the respiratory system and intrathoracic organs |
| Cancer | 165   | ICD9 | Malignant neoplasm of upper respiratory tract                                                            |

|        |       |      |                                                                                          |
|--------|-------|------|------------------------------------------------------------------------------------------|
| Cancer | 165.8 | ICD9 | Malignant neoplasm of other sites within the respiratory system and intrathoracic organs |
| Cancer | 165.9 | ICD9 | Malignant neoplasm of ill-defined sites within the respiratory system                    |
| Cancer | 170   | ICD9 | Malignant neoplasm of bone and articular cartilage                                       |
| Cancer | 170   | ICD9 | Malignant neoplasm of bones of skull and face                                            |
| Cancer | 170.1 | ICD9 | Malignant neoplasm of mandible                                                           |
| Cancer | 170.2 | ICD9 | Malignant neoplasm of vertebral column                                                   |
| Cancer | 170.3 | ICD9 | Malignant neoplasm of ribs                                                               |
| Cancer | 170.4 | ICD9 | Malignant neoplasm of scapula and long bones of upper limb                               |
| Cancer | 170.5 | ICD9 | Malignant neoplasm of short bones of upper limb                                          |
| Cancer | 170.6 | ICD9 | Malignant neoplasm of pelvic bones                                                       |
| Cancer | 170.7 | ICD9 | Malignant neoplasm of long bones of lower limb                                           |
| Cancer | 170.8 | ICD9 | Malignant neoplasm of short bones of lower limb                                          |
| Cancer | 170.9 | ICD9 | Malignant neoplasm of bone and articular cartilage                                       |
| Cancer | 171   | ICD9 | Malignant neoplasm of connective and other soft tissue                                   |
| Cancer | 171   | ICD9 | Malignant neoplasm of connective and other soft tissue of head                           |
| Cancer | 171.2 | ICD9 | Malignant neoplasm of connective and other soft tissue of upper limb                     |
| Cancer | 171.3 | ICD9 | Malignant neoplasm of connective and other soft tissue of lower limb                     |
| Cancer | 171.4 | ICD9 | Malignant neoplasm of connective and other soft tissue of thorax                         |
| Cancer | 171.5 | ICD9 | Malignant neoplasm of connective and other soft tissue of abdomen                        |
| Cancer | 171.6 | ICD9 | Malignant neoplasm of connective and other soft tissue of pelvis                         |
| Cancer | 171.7 | ICD9 | Malignant neoplasm of connective and other soft tissue of trunk                          |

|        |        |      |                                                                                   |
|--------|--------|------|-----------------------------------------------------------------------------------|
| Cancer | 171.8  | ICD9 | Malignant neoplasm of other specified sites of connective and other soft tissue   |
| Cancer | 171.9  | ICD9 | Malignant neoplasm of connective and other soft tissue                            |
| Cancer | 173    | ICD9 | Other malignant neoplasm of skin                                                  |
| Cancer | 173    | ICD9 | Other malignant neoplasm of skin of lip                                           |
| Cancer | 173    | ICD9 | Unspecified malignant neoplasm of skin of lip                                     |
| Cancer | 173.09 | ICD9 | Other specified malignant neoplasm of skin of lip                                 |
| Cancer | 173.1  | ICD9 | Other malignant neoplasm of skin of eyelid                                        |
| Cancer | 173.1  | ICD9 | Unspecified malignant neoplasm of eyelid                                          |
| Cancer | 173.19 | ICD9 | Other specified malignant neoplasm of eyelid                                      |
| Cancer | 173.2  | ICD9 | Other malignant neoplasm of skin of ear and external auditory canal               |
| Cancer | 173.2  | ICD9 | Unspecified malignant neoplasm of skin of ear and external auditory canal         |
| Cancer | 173.29 | ICD9 | Other specified malignant neoplasm of skin of ear and external auditory canal     |
| Cancer | 173.3  | ICD9 | Other malignant neoplasm of skin of other and unspecified parts of face           |
| Cancer | 173.3  | ICD9 | Unspecified malignant neoplasm of skin of other and unspecified parts of face     |
| Cancer | 173.39 | ICD9 | Other specified malignant neoplasm of skin of other and unspecified parts of face |
| Cancer | 173.4  | ICD9 | Other malignant neoplasm of scalp and skin of neck                                |
| Cancer | 173.4  | ICD9 | Unspecified malignant neoplasm of scalp and skin of neck                          |
| Cancer | 173.49 | ICD9 | Other specified malignant neoplasm of scalp and skin of neck                      |
| Cancer | 173.5  | ICD9 | Other malignant neoplasm of skin of trunk                                         |
| Cancer | 173.5  | ICD9 | Unspecified malignant neoplasm of skin of trunk                                   |

|        |        |      |                                                                     |
|--------|--------|------|---------------------------------------------------------------------|
| Cancer | 173.59 | ICD9 | Other specified malignant neoplasm of skin of trunk                 |
| Cancer | 173.6  | ICD9 | Other malignant neoplasm of skin of upper limb                      |
| Cancer | 173.6  | ICD9 | Unspecified malignant neoplasm of skin of upper limb                |
| Cancer | 173.69 | ICD9 | Other specified malignant neoplasm of skin of upper limb            |
| Cancer | 173.7  | ICD9 | Other malignant neoplasm of skin of lower limb                      |
| Cancer | 173.7  | ICD9 | Unspecified malignant neoplasm of skin of lower limb                |
| Cancer | 173.79 | ICD9 | Other specified malignant neoplasm of skin of lower limb            |
| Cancer | 173.8  | ICD9 | Other malignant neoplasm of other specified sites of skin           |
| Cancer | 173.8  | ICD9 | Unspecified malignant neoplasm of other specified sites of skin     |
| Cancer | 173.89 | ICD9 | Other specified malignant neoplasm of other specified sites of skin |
| Cancer | 173.9  | ICD9 | Other malignant neoplasm of skin                                    |
| Cancer | 173.9  | ICD9 | Unspecified malignant neoplasm of skin                              |
| Cancer | 173.99 | ICD9 | Other specified malignant neoplasm of skin                          |
| Cancer | 175    | ICD9 | Malignant neoplasm of male breast                                   |
| Cancer | 175    | ICD9 | Malignant neoplasm of nipple and areola of male breast              |
| Cancer | 175.9  | ICD9 | Malignant neoplasm of other and unspecified sites of male breast    |
| Cancer | 180    | ICD9 | Malignant neoplasm of cervix uteri                                  |
| Cancer | 180    | ICD9 | Malignant neoplasm of endocervix                                    |
| Cancer | 180.1  | ICD9 | Malignant neoplasm of exocervix                                     |
| Cancer | 180.8  | ICD9 | Malignant neoplasm of other specified sites of cervix               |
| Cancer | 180.9  | ICD9 | Malignant neoplasm of cervix uteri                                  |
| Cancer | 184    | ICD9 | Malignant neoplasm of vagina                                        |
| Cancer | 184.1  | ICD9 | Malignant neoplasm of labia majora                                  |
| Cancer | 184.2  | ICD9 | Malignant neoplasm of labia minora                                  |
| Cancer | 184.3  | ICD9 | Malignant neoplasm of clitoris                                      |
| Cancer | 184.4  | ICD9 | Malignant neoplasm of vulva                                         |

|        |       |      |                                                                     |
|--------|-------|------|---------------------------------------------------------------------|
| Cancer | 185   | ICD9 | Malignant neoplasm of prostate                                      |
|        |       |      | Malignant neoplasm of penis and other male genital organs           |
| Cancer | 187   | ICD9 |                                                                     |
| Cancer | 190   | ICD9 | Malignant neoplasm of eye                                           |
| Cancer | 190   | ICD9 | Malignant neoplasm of eyeball                                       |
| Cancer | 190.1 | ICD9 | Malignant neoplasm of orbit                                         |
| Cancer | 190.2 | ICD9 | Malignant neoplasm of lacrimal gland                                |
| Cancer | 190.3 | ICD9 | Malignant neoplasm of conjunctiva                                   |
| Cancer | 190.4 | ICD9 | Malignant neoplasm of cornea                                        |
| Cancer | 190.5 | ICD9 | Malignant neoplasm of retina                                        |
| Cancer | 190.6 | ICD9 | Malignant neoplasm of choroid                                       |
| Cancer | 190.7 | ICD9 | Malignant neoplasm of lacrimal duct                                 |
|        |       |      | Malignant neoplasm of other specified sites of eye                  |
| Cancer | 190.8 | ICD9 |                                                                     |
| Cancer | 190.9 | ICD9 | Malignant neoplasm of eye                                           |
| Cancer | 191   | ICD9 | Malignant neoplasm of brain                                         |
| Cancer | 191   | ICD9 | Malignant neoplasm of cerebrum                                      |
| Cancer | 191.1 | ICD9 | Malignant neoplasm of frontal lobe                                  |
| Cancer | 191.2 | ICD9 | Malignant neoplasm of temporal lobe                                 |
| Cancer | 191.3 | ICD9 | Malignant neoplasm of parietal lobe                                 |
| Cancer | 191.4 | ICD9 | Malignant neoplasm of occipital lobe                                |
| Cancer | 191.5 | ICD9 | Malignant neoplasm of ventricles                                    |
| Cancer | 191.6 | ICD9 | Malignant neoplasm of cerebellum NOS                                |
| Cancer | 191.7 | ICD9 | Malignant neoplasm of brain stem                                    |
|        |       |      | Malignant neoplasm of other parts of brain                          |
| Cancer | 191.8 | ICD9 |                                                                     |
| Cancer | 191.9 | ICD9 | Malignant neoplasm of brain                                         |
|        |       |      | Malignant neoplasm of other and unspecified parts of nervous system |
| Cancer | 192   | ICD9 |                                                                     |
| Cancer | 192   | ICD9 | Malignant neoplasm of cranial nerves                                |
|        |       |      |                                                                     |
| Cancer | 192.1 | ICD9 | Malignant neoplasm of cerebral meninges                             |
| Cancer | 192.2 | ICD9 | Malignant neoplasm of spinal cord                                   |
| Cancer | 192.3 | ICD9 | Malignant neoplasm of spinal meninges                               |
|        |       |      | Malignant neoplasm of other specified sites of nervous system       |
| Cancer | 192.8 | ICD9 |                                                                     |
| Cancer | 192.9 | ICD9 | Malignant neoplasm of nervous system                                |
| Cancer | 193   | ICD9 | Malignant neoplasm of thyroid gland                                 |
|        |       |      | Malignant neoplasm of other endocrine glands and related structures |
| Cancer | 194   | ICD9 |                                                                     |



|        |        |      |                                                                                 |
|--------|--------|------|---------------------------------------------------------------------------------|
| Cancer | 194    | ICD9 | Malignant neoplasm of adrenal gland                                             |
| Cancer | 194.1  | ICD9 | Malignant neoplasm of parathyroid gland                                         |
| Cancer | 194.3  | ICD9 | Malignant neoplasm of pituitary gland and craniopharyngeal duct                 |
| Cancer | 194.4  | ICD9 | Malignant neoplasm of pineal gland                                              |
| Cancer | 194.5  | ICD9 | Malignant neoplasm of carotid body                                              |
| Cancer | 194.6  | ICD9 | Malignant neoplasm of aortic body and other paraganglia                         |
| Cancer | 194.8  | ICD9 | Malignant neoplasm of other endocrine glands and related structures             |
| Cancer | 194.9  | ICD9 | Malignant neoplasm of endocrine gland                                           |
| Cancer | 195.1  | ICD9 | Malignant neoplasm of thorax                                                    |
| Cancer | 202    | ICD9 | Other malignant neoplasms of lymphoid and histiocytic tissue                    |
| Cancer | 202.3  | ICD9 | Malignant histiocytosis                                                         |
| Cancer | 202.3  | ICD9 | Malignant histiocytosis                                                         |
| Cancer | 202.31 | ICD9 | Malignant histiocytosis involving lymph nodes of head                           |
| Cancer | 202.32 | ICD9 | Malignant histiocytosis involving intrathoracic lymph nodes                     |
| Cancer | 202.33 | ICD9 | Malignant histiocytosis involving intra-abdominal lymph nodes                   |
| Cancer | 202.34 | ICD9 | Malignant histiocytosis involving lymph nodes of axilla and upper limb          |
| Cancer | 202.35 | ICD9 | Malignant histiocytosis involving lymph nodes of inguinal region and lower limb |
| Cancer | 202.36 | ICD9 | Malignant histiocytosis involving intrapelvic lymph nodes                       |
| Cancer | 202.37 | ICD9 | Malignant histiocytosis involving spleen                                        |
| Cancer | 202.38 | ICD9 | Malignant histiocytosis involving lymph nodes of multiple sites                 |
| Cancer | 202.5  | ICD9 | Letterer-Siwe disease                                                           |
| Cancer | 202.5  | ICD9 | Letterer-Siwe disease                                                           |
| Cancer | 202.51 | ICD9 | Letterer-Siwe disease involving lymph nodes of head                             |
| Cancer | 202.52 | ICD9 | Letterer-Siwe disease involving intrathoracic lymph nodes                       |
| Cancer | 202.53 | ICD9 | Letterer-Siwe disease involving intra-abdominal lymph nodes                     |

|        |        |      |                                                                                    |
|--------|--------|------|------------------------------------------------------------------------------------|
| Cancer | 202.54 | ICD9 | Letterer-Siwe disease involving lymph nodes of axilla and upper limb               |
| Cancer | 202.55 | ICD9 | Letterer-Siwe disease involving lymph nodes of inguinal region and lower limb      |
| Cancer | 202.56 | ICD9 | Letterer-Siwe disease involving intrapelvic lymph nodes                            |
| Cancer | 202.57 | ICD9 | Letterer-Siwe disease involving spleen                                             |
| Cancer | 202.58 | ICD9 | Letterer-Siwe disease involving lymph nodes of multiple sites                      |
| Cancer | 202.6  | ICD9 | Malignant mast cell tumors                                                         |
| Cancer | 202.6  | ICD9 | Malignant mast cell tumors                                                         |
| Cancer | 202.61 | ICD9 | Malignant mast cell tumors involving lymph nodes of head                           |
| Cancer | 202.62 | ICD9 | Malignant mast cell tumors involving intrathoracic lymph nodes                     |
| Cancer | 202.63 | ICD9 | Malignant mast cell tumors involving intra-abdominal lymph nodes                   |
| Cancer | 202.64 | ICD9 | Malignant mast cell tumors involving lymph nodes of axilla and upper limb          |
| Cancer | 202.65 | ICD9 | Malignant mast cell tumors involving lymph nodes of inguinal region and lower limb |
| Cancer | 202.66 | ICD9 | Malignant mast cell tumors involving intrapelvic lymph nodes                       |
| Cancer | 202.67 | ICD9 | Malignant mast cell tumors involving spleen                                        |
| Cancer | 202.68 | ICD9 | Malignant mast cell tumors involving lymph nodes of multiple sites                 |
| Cancer | 209.1  | ICD9 | Malignant carcinoid tumors of the appendix                                         |
| Cancer | 209.1  | ICD9 | Malignant carcinoid tumor of the large intestine                                   |
| Cancer | 209.11 | ICD9 | Malignant carcinoid tumor of the appendix                                          |
| Cancer | 209.12 | ICD9 | Malignant carcinoid tumor of the cecum                                             |
| Cancer | 209.13 | ICD9 | Malignant carcinoid tumor of the ascending colon                                   |
| Cancer | 209.14 | ICD9 | Malignant carcinoid tumor of the transverse colon                                  |

|        |        |      |                                                           |
|--------|--------|------|-----------------------------------------------------------|
| Cancer | 209.15 | ICD9 | Malignant carcinoid tumor of the descending colon         |
| Cancer | 209.16 | ICD9 | Malignant carcinoid tumor of the sigmoid colon            |
| Cancer | 209.2  | ICD9 | Malignant carcinoid tumors of other and unspecified sites |
| Cancer | 209.2  | ICD9 | Malignant carcinoid tumor of unknown primary site         |
| Cancer | 209.21 | ICD9 | Malignant carcinoid tumor of the bronchus and lung        |
| Cancer | 209.22 | ICD9 | Malignant carcinoid tumor of the thymus                   |
| Cancer | 209.23 | ICD9 | Malignant carcinoid tumor of the stomach                  |
| Cancer | 209.24 | ICD9 | Malignant carcinoid tumor of the kidney                   |
| Cancer | 209.29 | ICD9 | Malignant carcinoid tumors of other sites                 |
| Cancer | 209.3  | ICD9 | Malignant poorly differentiated neuroendocrine tumors     |
| Cancer | 209.3  | ICD9 | Malignant poorly differentiated neuroendocrine carcinoma  |
| Cancer | 209.31 | ICD9 | Merkel cell carcinoma of the face (ADDED)                 |
| Cancer | 209.32 | ICD9 | Merkel cell carcinoma of the scalp & neck (ADDED)         |
| Cancer | 209.33 | ICD9 | Merkel cell carcinoma of the upper limb (ADDED)           |
| Cancer | 209.34 | ICD9 | Merkel cell carcinoma of the lower limb (ADDED)           |
| Cancer | 209.35 | ICD9 | Merkel cell carcinoma of the trunk (ADDED)                |
| Cancer | 209.36 | ICD9 | Merkel cell carcinoma of other sites (ADDED)              |
| Cancer | 209.7  | ICD9 | Secondary neuroendocrine tumor                            |
| Cancer | 209.75 | ICD9 | Merkel cell carcinoma                                     |
| Cancer | 230    | ICD9 | Carcinoma in situ of lip                                  |
| Cancer | 230.1  | ICD9 | Carcinoma in situ of esophagus                            |
| Cancer | 230.2  | ICD9 | Carcinoma in situ of stomach                              |
| Cancer | 230.3  | ICD9 | Carcinoma in situ of colon                                |
| Cancer | 230.8  | ICD9 | Carcinoma in situ of liver and biliary system             |

|    |        |        |      |                                            |
|----|--------|--------|------|--------------------------------------------|
| 1  |        |        |      |                                            |
| 2  |        |        |      |                                            |
| 3  | Cancer | 231    | ICD9 | Carcinoma in situ of respiratory system    |
| 4  | Cancer | 231    | ICD9 | Carcinoma in situ of larynx                |
| 5  | Cancer | 231.1  | ICD9 | Carcinoma in situ of trachea               |
| 6  | Cancer | 231.2  | ICD9 | Carcinoma in situ of bronchus and lung     |
| 7  |        |        |      | Carcinoma in situ of other specified parts |
| 8  |        |        |      | of respiratory system                      |
| 9  | Cancer | 231.8  | ICD9 | Carcinoma in situ of respiratory system    |
| 10 | Cancer | 231.9  | ICD9 | Carcinoma in situ of respiratory system    |
| 11 | Cancer | 232    | ICD9 | Carcinoma in situ of skin                  |
| 12 |        |        |      | Carcinoma in situ of breast and            |
| 13 | Cancer | 233    | ICD9 | genitourinary system                       |
| 14 | Cancer | 233    | ICD9 | Carcinoma in situ of breast                |
| 15 |        |        |      | Carcinoma in situ of other and unspecified |
| 16 | Cancer | 233.3  | ICD9 | female genital organs                      |
| 17 |        |        |      | Carcinoma in situ of unspecified female    |
| 18 | Cancer | 233.3  | ICD9 | genital organ                              |
| 19 | Cancer | 233.31 | ICD9 | Carcinoma in situ of vagina                |
| 20 | Cancer | 233.32 | ICD9 | Carcinoma in situ of vulva                 |
| 21 |        |        |      | Carcinoma in situ of other female genital  |
| 22 | Cancer | 233.39 | ICD9 | organ                                      |
| 23 | Cancer | 233.4  | ICD9 | Carcinoma in situ of prostate              |
| 24 | Cancer | 233.5  | ICD9 | Carcinoma in situ of penis                 |
| 25 |        |        |      | Carcinoma in situ of other and unspecified |
| 26 | Cancer | 233.6  | ICD9 | male genital organs                        |
| 27 | Cancer | 233.7  | ICD9 | Carcinoma in situ of bladder               |
| 28 |        |        |      | Carcinoma in situ of other and unspecified |
| 29 | Cancer | 233.9  | ICD9 | urinary organs                             |
| 30 |        |        |      | Carcinoma in situ of other and unspecified |
| 31 | Cancer | 234    | ICD9 | sites                                      |
| 32 | Cancer | 234    | ICD9 | Carcinoma in situ of eye                   |
| 33 | Cancer | 234.8  | ICD9 | Carcinoma in situ of other specified sites |
| 34 | Cancer | 234.9  | ICD9 | Carcinoma in situ                          |
| 35 |        |        |      |                                            |
| 36 | Cancer | 236    | ICD9 | Neoplasm of uncertain behavior of uterus   |
| 37 |        |        |      | Neoplasm of uncertain behavior of          |
| 38 | Cancer | 236.1  | ICD9 | placenta                                   |
| 39 | Cancer | 236.2  | ICD9 | Neoplasm of uncertain behavior of ovary    |
| 40 |        |        |      | Neoplasm of uncertain behavior of other    |
| 41 | Cancer | 236.3  | ICD9 | and unspecified female genital organs      |
| 42 |        |        |      | Neoplasm of uncertain behavior of          |
| 43 | Cancer | 236.7  | ICD9 | bladder                                    |
| 44 |        |        |      |                                            |
| 45 |        |        |      |                                            |
| 46 |        |        |      |                                            |
| 47 |        |        |      |                                            |
| 48 |        |        |      |                                            |
| 49 |        |        |      |                                            |
| 50 |        |        |      |                                            |
| 51 |        |        |      |                                            |
| 52 |        |        |      |                                            |
| 53 |        |        |      |                                            |
| 54 |        |        |      |                                            |
| 55 |        |        |      |                                            |
| 56 |        |        |      |                                            |
| 57 |        |        |      |                                            |
| 58 |        |        |      |                                            |
| 59 |        |        |      |                                            |
| 60 |        |        |      |                                            |

|        |        |       |                                                                                      |
|--------|--------|-------|--------------------------------------------------------------------------------------|
| Cancer | 239.4  | ICD9  | Neoplasm of unspecified nature of bladder                                            |
| Cancer | 338.3  | ICD9  | Neoplasm related pain (acute) (chronic)                                              |
| Cancer | 795.82 | ICD9  | Elevated cancer antigen 125 [CA 125]                                                 |
| Cancer | V10.01 | ICD10 | Personal history of malignant neoplasm of tongue                                     |
| Cancer | V10.03 | ICD10 | Personal history of malignant neoplasm of esophagus                                  |
| Cancer | V10.04 | ICD10 | Personal history of malignant neoplasm of stomach                                    |
| Cancer | V10.05 | ICD10 | Personal history of malignant neoplasm of large intestine                            |
| Cancer | V10.1  | ICD10 | Personal history of malignant neoplasm of trachea                                    |
| Cancer | V10.11 | ICD10 | Personal history of malignant neoplasm of bronchus and lung                          |
| Cancer | V10.12 | ICD10 | Personal history of malignant neoplasm of trachea                                    |
| Cancer | V10.2  | ICD10 | Personal history of malignant neoplasm of other respiratory and intrathoracic organs |
| Cancer | V10.20 | ICD10 | Personal history of malignant neoplasm of unspecified respiratory organ              |
| Cancer | V10.21 | ICD10 | Personal history of malignant neoplasm of larynx                                     |
| Cancer | V10.22 | ICD10 | Personal history of malignant neoplasm of nasal cavities                             |
| Cancer | V10.29 | ICD10 | Personal history of malignant neoplasm of other respiratory and intrathoracic organs |
| Cancer | V10.41 | ICD10 | Personal history of malignant neoplasm of cervix uteri                               |
| Cancer | V10.46 | ICD10 | Personal history of malignant neoplasm of prostate                                   |
| Cancer | V10.48 | ICD10 | Personal history of malignant neoplasm of epididymis                                 |
| Cancer | V10.52 | ICD10 | Personal history of malignant neoplasm of kidney                                     |
| Cancer | V10.7  | ICD10 | Personal history of other lymphatic and hematopoietic neoplasms                      |

|        |        |       |                                                                                         |
|--------|--------|-------|-----------------------------------------------------------------------------------------|
| Cancer | V10.79 | ICD10 | Personal history of other lymphatic and hematopoietic neoplasms                         |
| Cancer | V10.81 | ICD10 | Personal history of malignant neoplasm of bone                                          |
| Cancer | V10.83 | ICD10 | Personal history of other malignant neoplasm of skin                                    |
| Cancer | V10.84 | ICD10 | Personal history of malignant neoplasm of eye                                           |
| Cancer | V10.85 | ICD10 | Personal history of malignant neoplasm of brain                                         |
| Cancer | V10.86 | ICD10 | Personal history of malignant neoplasm of other parts of nervous system                 |
| Cancer | V10.87 | ICD10 | Personal history of malignant neoplasm of thyroid                                       |
| Cancer | V10.88 | ICD10 | Personal history of malignant neoplasm of other endocrine glands and related structures |
| Cancer | C00    | ICD10 | Malignant neoplasm of lip                                                               |
| Cancer | C00.0  | ICD10 | Malignant neoplasm of external upper lip                                                |
| Cancer | C00.1  | ICD10 | Malignant neoplasm of external lower lip                                                |
| Cancer | C00.2  | ICD10 | Malignant neoplasm of external lip                                                      |
| Cancer | C00.3  | ICD10 | Malignant neoplasm of upper lip                                                         |
| Cancer | C00.4  | ICD10 | Malignant neoplasm of lower lip                                                         |
| Cancer | C00.5  | ICD10 | Malignant neoplasm of lip                                                               |
| Cancer | C00.6  | ICD10 | Malignant neoplasm of commissure of lip                                                 |
| Cancer | C00.8  | ICD10 | Malignant neoplasm of overlapping sites of lip                                          |
| Cancer | C00.9  | ICD10 | Malignant neoplasm of lip                                                               |
| Cancer | C01    | ICD10 | Malignant neoplasm of base of tongue                                                    |
| Cancer | C02    | ICD10 | Malignant neoplasm of other and unspecified parts of tongue                             |
| Cancer | C02.0  | ICD10 | Malignant neoplasm of dorsal surface of tongue                                          |
| Cancer | C02.1  | ICD10 | Malignant neoplasm of border of tongue                                                  |
| Cancer | C02.2  | ICD10 | Malignant neoplasm of ventral surface of tongue                                         |

|        |        |       |                                                                                 |
|--------|--------|-------|---------------------------------------------------------------------------------|
| Cancer | C02.3  | ICD10 | Malignant neoplasm of anterior two-thirds of tongue                             |
| Cancer | C02.4  | ICD10 | Malignant neoplasm of lingual tonsil                                            |
| Cancer | C02.8  | ICD10 | Malignant neoplasm of overlapping sites of tongue                               |
| Cancer | C02.9  | ICD10 | Malignant neoplasm of tongue                                                    |
| Cancer | C03    | ICD10 | Malignant neoplasm of gum                                                       |
| Cancer | C03.0  | ICD10 | Malignant neoplasm of upper gum                                                 |
| Cancer | C03.1  | ICD10 | Malignant neoplasm of lower gum                                                 |
| Cancer | C03.9  | ICD10 | Malignant neoplasm of gum                                                       |
| Cancer | C04    | ICD10 | Malignant neoplasm of floor of mouth                                            |
| Cancer | C04.0  | ICD10 | Malignant neoplasm of anterior floor of mouth                                   |
| Cancer | C04.1  | ICD10 | Malignant neoplasm of lateral floor of mouth                                    |
| Cancer | C04.8  | ICD10 | Malignant neoplasm of overlapping sites of floor of mouth                       |
| Cancer | C04.9  | ICD10 | Malignant neoplasm of floor of mouth                                            |
| Cancer | C05    | ICD10 | Malignant neoplasm of palate                                                    |
| Cancer | C05.0  | ICD10 | Malignant neoplasm of hard palate                                               |
| Cancer | C05.1  | ICD10 | Malignant neoplasm of soft palate                                               |
| Cancer | C05.2  | ICD10 | Malignant neoplasm of uvula                                                     |
| Cancer | C05.8  | ICD10 | Malignant neoplasm of overlapping sites of palate                               |
| Cancer | C05.9  | ICD10 | Malignant neoplasm of palate                                                    |
| Cancer | C06    | ICD10 | Malignant neoplasm of other and unspecified parts of mouth                      |
| Cancer | C06.0  | ICD10 | Malignant neoplasm of cheek mucosa                                              |
| Cancer | C06.1  | ICD10 | Malignant neoplasm of vestibule of mouth                                        |
| Cancer | C06.2  | ICD10 | Malignant neoplasm of retromolar area                                           |
| Cancer | C06.8  | ICD10 | Malignant neoplasm of overlapping sites of other and unspecified parts of mouth |
| Cancer | C06.80 | ICD10 | Malignant neoplasm of overlapping sites of unspecified parts of mouth           |
| Cancer | C06.89 | ICD10 | Malignant neoplasm of overlapping sites of other parts of mouth                 |
| Cancer | C06.9  | ICD10 | Malignant neoplasm of mouth                                                     |
| Cancer | C07    | ICD10 | Malignant neoplasm of parotid gland                                             |

|        |       |       |                                                                   |
|--------|-------|-------|-------------------------------------------------------------------|
| Cancer | C08   | ICD10 | Malignant neoplasm of other and unspecified major salivary glands |
| Cancer | C08.0 | ICD10 | Malignant neoplasm of submandibular gland                         |
| Cancer | C08.1 | ICD10 | Malignant neoplasm of sublingual gland                            |
| Cancer | C08.9 | ICD10 | Malignant neoplasm of major salivary gland                        |
| Cancer | C09   | ICD10 | Malignant neoplasm of tonsil                                      |
| Cancer | C09.0 | ICD10 | Malignant neoplasm of tonsillar fossa                             |
| Cancer | C09.1 | ICD10 | Malignant neoplasm of tonsillar pillar (anterior) (posterior)     |
| Cancer | C09.8 | ICD10 | Malignant neoplasm of overlapping sites of tonsil                 |
| Cancer | C09.9 | ICD10 | Malignant neoplasm of tonsil                                      |
| Cancer | C10   | ICD10 | Malignant neoplasm of oropharynx                                  |
| Cancer | C10.0 | ICD10 | Malignant neoplasm of vallecula                                   |
| Cancer | C10.1 | ICD10 | Malignant neoplasm of anterior surface of epiglottis              |
| Cancer | C10.2 | ICD10 | Malignant neoplasm of lateral wall of oropharynx                  |
| Cancer | C10.3 | ICD10 | Malignant neoplasm of posterior wall of oropharynx                |
| Cancer | C10.4 | ICD10 | Malignant neoplasm of branchial cleft                             |
| Cancer | C10.8 | ICD10 | Malignant neoplasm of overlapping sites of oropharynx             |
| Cancer | C10.9 | ICD10 | Malignant neoplasm of oropharynx                                  |
| Cancer | C11   | ICD10 | Malignant neoplasm of nasopharynx                                 |
| Cancer | C11.0 | ICD10 | Malignant neoplasm of superior wall of nasopharynx                |
| Cancer | C11.1 | ICD10 | Malignant neoplasm of posterior wall of nasopharynx               |
| Cancer | C11.2 | ICD10 | Malignant neoplasm of lateral wall of nasopharynx                 |
| Cancer | C11.3 | ICD10 | Malignant neoplasm of anterior wall of nasopharynx                |
| Cancer | C11.8 | ICD10 | Malignant neoplasm of overlapping sites of nasopharynx            |
| Cancer | C11.9 | ICD10 | Malignant neoplasm of nasopharynx                                 |
| Cancer | C12   | ICD10 | Malignant neoplasm of pyriform sinus                              |
| Cancer | C13   | ICD10 | Malignant neoplasm of hypopharynx                                 |



|        |       |       |                                                              |
|--------|-------|-------|--------------------------------------------------------------|
| Cancer | C13.0 | ICD10 | Malignant neoplasm of postcricoid region                     |
| Cancer | C13.1 | ICD10 | Malignant neoplasm of aryepiglottic fold                     |
| Cancer | C13.2 | ICD10 | Malignant neoplasm of posterior wall of hypopharynx          |
| Cancer | C13.8 | ICD10 | Malignant neoplasm of overlapping sites of hypopharynx       |
| Cancer | C13.9 | ICD10 | Malignant neoplasm of hypopharynx                            |
| Cancer | C14   | ICD10 | Malignant neoplasm of other and ill-defined sites in the lip |
| Cancer | C14.0 | ICD10 | Malignant neoplasm of pharynx                                |
| Cancer | C14.2 | ICD10 | Malignant neoplasm of Waldeyer's ring                        |
| Cancer | C14.8 | ICD10 | Malignant neoplasm of overlapping sites of lip               |
| Cancer | C15   | ICD10 | Malignant neoplasm of esophagus                              |
| Cancer | C15.3 | ICD10 | Malignant neoplasm of upper third of esophagus               |
| Cancer | C15.4 | ICD10 | Malignant neoplasm of middle third of esophagus              |
| Cancer | C15.5 | ICD10 | Malignant neoplasm of lower third of esophagus               |
| Cancer | C15.8 | ICD10 | Malignant neoplasm of overlapping sites of esophagus         |
| Cancer | C15.9 | ICD10 | Malignant neoplasm of esophagus                              |
| Cancer | C16   | ICD10 | Malignant neoplasm of stomach                                |
| Cancer | C16.0 | ICD10 | Malignant neoplasm of cardia                                 |
| Cancer | C16.1 | ICD10 | Malignant neoplasm of fundus of stomach                      |
| Cancer | C16.2 | ICD10 | Malignant neoplasm of body of stomach                        |
| Cancer | C16.3 | ICD10 | Malignant neoplasm of pyloric antrum                         |
| Cancer | C16.4 | ICD10 | Malignant neoplasm of pylorus                                |
| Cancer | C16.5 | ICD10 | Malignant neoplasm of lesser curvature of stomach            |
| Cancer | C16.6 | ICD10 | Malignant neoplasm of greater curvature of stomach           |
| Cancer | C16.8 | ICD10 | Malignant neoplasm of overlapping sites of stomach           |
| Cancer | C16.9 | ICD10 | Malignant neoplasm of stomach                                |
| Cancer | C18   | ICD10 | Malignant neoplasm of colon                                  |
| Cancer | C18.0 | ICD10 | Malignant neoplasm of cecum                                  |

|        |       |       |                                                              |
|--------|-------|-------|--------------------------------------------------------------|
| Cancer | C18.1 | ICD10 | Malignant neoplasm of appendix                               |
| Cancer | C18.2 | ICD10 | Malignant neoplasm of ascending colon                        |
| Cancer | C18.3 | ICD10 | Malignant neoplasm of hepatic flexure                        |
| Cancer | C18.4 | ICD10 | Malignant neoplasm of transverse colon                       |
| Cancer | C18.5 | ICD10 | Malignant neoplasm of splenic flexure                        |
| Cancer | C18.6 | ICD10 | Malignant neoplasm of descending colon                       |
| Cancer | C18.7 | ICD10 | Malignant neoplasm of sigmoid colon                          |
| Cancer | C18.8 | ICD10 | Malignant neoplasm of overlapping sites of colon             |
| Cancer | C18.9 | ICD10 | Malignant neoplasm of colon                                  |
| Cancer | C21.2 | ICD10 | Malignant neoplasm of cloacogenic zone                       |
| Cancer | C21.8 | ICD10 | Malignant neoplasm of overlapping sites of rectum            |
| Cancer | C22   | ICD10 | Malignant neoplasm of liver and intrahepatic bile ducts      |
| Cancer | C22.1 | ICD10 | Intrahepatic bile duct carcinoma                             |
| Cancer | C22.9 | ICD10 | Malignant neoplasm of liver                                  |
| Cancer | C25   | ICD10 | Malignant neoplasm of pancreas                               |
| Cancer | C25.0 | ICD10 | Malignant neoplasm of head of pancreas                       |
| Cancer | C25.1 | ICD10 | Malignant neoplasm of body of pancreas                       |
| Cancer | C25.2 | ICD10 | Malignant neoplasm of tail of pancreas                       |
| Cancer | C25.3 | ICD10 | Malignant neoplasm of pancreatic duct                        |
| Cancer | C25.4 | ICD10 | Malignant neoplasm of endocrine pancreas                     |
| Cancer | C25.7 | ICD10 | Malignant neoplasm of other parts of pancreas                |
| Cancer | C25.8 | ICD10 | Malignant neoplasm of overlapping sites of pancreas          |
| Cancer | C25.9 | ICD10 | Malignant neoplasm of pancreas                               |
| Cancer | C26.0 | ICD10 | Malignant neoplasm of intestinal tract                       |
| Cancer | C30.0 | ICD10 | Malignant neoplasm of nasal cavity                           |
| Cancer | C30.1 | ICD10 | Malignant neoplasm of middle ear                             |
| Cancer | C31   | ICD10 | Malignant neoplasm of accessory sinuses                      |
| Cancer | C31.0 | ICD10 | Malignant neoplasm of maxillary sinus                        |
| Cancer | C31.1 | ICD10 | Malignant neoplasm of ethmoidal sinus                        |
| Cancer | C31.2 | ICD10 | Malignant neoplasm of frontal sinus                          |
| Cancer | C31.3 | ICD10 | Malignant neoplasm of sphenoid sinus                         |
| Cancer | C31.8 | ICD10 | Malignant neoplasm of overlapping sites of accessory sinuses |

|        |        |       |                                                                          |
|--------|--------|-------|--------------------------------------------------------------------------|
| Cancer | C31.9  | ICD10 | Malignant neoplasm of accessory sinus                                    |
| Cancer | C32    | ICD10 | Malignant neoplasm of larynx                                             |
| Cancer | C32.0  | ICD10 | Malignant neoplasm of glottis                                            |
| Cancer | C32.1  | ICD10 | Malignant neoplasm of supraglottis                                       |
| Cancer | C32.2  | ICD10 | Malignant neoplasm of subglottis                                         |
| Cancer | C32.3  | ICD10 | Malignant neoplasm of laryngeal cartilage                                |
| Cancer | C32.8  | ICD10 | Malignant neoplasm of overlapping sites of larynx                        |
| Cancer | C32.9  | ICD10 | Malignant neoplasm of larynx                                             |
| Cancer | C33    | ICD10 | Malignant neoplasm of trachea                                            |
| Cancer | C34    | ICD10 | Malignant neoplasm of bronchus and lung                                  |
| Cancer | C34.0  | ICD10 | Malignant neoplasm of main bronchus                                      |
| Cancer | C34.00 | ICD10 | Malignant neoplasm of unspecified main bronchus                          |
| Cancer | C34.01 | ICD10 | Malignant neoplasm of right main bronchus                                |
| Cancer | C34.02 | ICD10 | Malignant neoplasm of left main bronchus                                 |
| Cancer | C34.1  | ICD10 | Malignant neoplasm of upper lobe                                         |
| Cancer | C34.10 | ICD10 | Malignant neoplasm of upper lobe                                         |
| Cancer | C34.11 | ICD10 | Malignant neoplasm of upper lobe                                         |
| Cancer | C34.12 | ICD10 | Malignant neoplasm of upper lobe                                         |
| Cancer | C34.2  | ICD10 | Malignant neoplasm of middle lobe                                        |
| Cancer | C34.3  | ICD10 | Malignant neoplasm of lower lobe                                         |
| Cancer | C34.30 | ICD10 | Malignant neoplasm of lower lobe                                         |
| Cancer | C34.31 | ICD10 | Malignant neoplasm of lower lobe                                         |
| Cancer | C34.32 | ICD10 | Malignant neoplasm of lower lobe                                         |
| Cancer | C34.8  | ICD10 | Malignant neoplasm of overlapping sites of bronchus and lung             |
| Cancer | C34.80 | ICD10 | Malignant neoplasm of overlapping sites of unspecified bronchus and lung |
| Cancer | C34.81 | ICD10 | Malignant neoplasm of overlapping sites of right bronchus and lung       |
| Cancer | C34.82 | ICD10 | Malignant neoplasm of overlapping sites of left bronchus and lung        |
| Cancer | C34.9  | ICD10 | Malignant neoplasm of unspecified part of bronchus or lung               |

|        |        |       |                                                                                                      |
|--------|--------|-------|------------------------------------------------------------------------------------------------------|
| Cancer | C34.90 | ICD10 | Malignant neoplasm of unspecified part of unspecified bronchus or lung                               |
| Cancer | C34.91 | ICD10 | Malignant neoplasm of unspecified part of right bronchus or lung                                     |
| Cancer | C34.92 | ICD10 | Malignant neoplasm of unspecified part of left bronchus or lung                                      |
| Cancer | C37    | ICD10 | Malignant neoplasm of thymus                                                                         |
| Cancer | C38.0  | ICD10 | Malignant neoplasm of heart                                                                          |
| Cancer | C38.1  | ICD10 | Malignant neoplasm of anterior mediastinum                                                           |
| Cancer | C38.2  | ICD10 | Malignant neoplasm of posterior mediastinum                                                          |
| Cancer | C38.3  | ICD10 | Malignant neoplasm of mediastinum                                                                    |
| Cancer | C38.4  | ICD10 | Malignant neoplasm of pleura                                                                         |
| Cancer | C38.8  | ICD10 | Malignant neoplasm of overlapping sites of heart                                                     |
| Cancer | C39    | ICD10 | Malignant neoplasm of other and ill-defined sites in the respiratory system and intrathoracic organs |
| Cancer | C39.0  | ICD10 | Malignant neoplasm of upper respiratory tract                                                        |
| Cancer | C39.9  | ICD10 | Malignant neoplasm of lower respiratory tract                                                        |
| Cancer | C40    | ICD10 | Malignant neoplasm of bone and articular cartilage of limbs                                          |
| Cancer | C40.0  | ICD10 | Malignant neoplasm of scapula and long bones of upper limb                                           |
| Cancer | C40.00 | ICD10 | Malignant neoplasm of scapula and long bones of unspecified upper limb                               |
| Cancer | C40.01 | ICD10 | Malignant neoplasm of scapula and long bones of right upper limb                                     |
| Cancer | C40.02 | ICD10 | Malignant neoplasm of scapula and long bones of left upper limb                                      |
| Cancer | C40.1  | ICD10 | Malignant neoplasm of short bones of upper limb                                                      |
| Cancer | C40.10 | ICD10 | Malignant neoplasm of short bones of unspecified upper limb                                          |
| Cancer | C40.11 | ICD10 | Malignant neoplasm of short bones of right upper limb                                                |

|        |        |       |                                                                                             |
|--------|--------|-------|---------------------------------------------------------------------------------------------|
| Cancer | C40.12 | ICD10 | Malignant neoplasm of short bones of left upper limb                                        |
| Cancer | C40.2  | ICD10 | Malignant neoplasm of long bones of lower limb                                              |
| Cancer | C40.20 | ICD10 | Malignant neoplasm of long bones of unspecified lower limb                                  |
| Cancer | C40.21 | ICD10 | Malignant neoplasm of long bones of right lower limb                                        |
| Cancer | C40.22 | ICD10 | Malignant neoplasm of long bones of left lower limb                                         |
| Cancer | C40.3  | ICD10 | Malignant neoplasm of short bones of lower limb                                             |
| Cancer | C40.30 | ICD10 | Malignant neoplasm of short bones of unspecified lower limb                                 |
| Cancer | C40.31 | ICD10 | Malignant neoplasm of short bones of right lower limb                                       |
| Cancer | C40.32 | ICD10 | Malignant neoplasm of short bones of left lower limb                                        |
| Cancer | C40.8  | ICD10 | Malignant neoplasm of overlapping sites of bone and articular cartilage of limb             |
| Cancer | C40.80 | ICD10 | Malignant neoplasm of overlapping sites of bone and articular cartilage of unspecified limb |
| Cancer | C40.81 | ICD10 | Malignant neoplasm of overlapping sites of bone and articular cartilage of right limb       |
| Cancer | C40.82 | ICD10 | Malignant neoplasm of overlapping sites of bone and articular cartilage of left limb        |
| Cancer | C40.9  | ICD10 | Malignant neoplasm of unspecified bones and articular cartilage of limb                     |
| Cancer | C40.90 | ICD10 | Malignant neoplasm of unspecified bones and articular cartilage of unspecified limb         |
| Cancer | C40.91 | ICD10 | Malignant neoplasm of unspecified bones and articular cartilage of right limb               |
| Cancer | C40.92 | ICD10 | Malignant neoplasm of unspecified bones and articular cartilage of left limb                |

|        |         |       |                                                                                   |
|--------|---------|-------|-----------------------------------------------------------------------------------|
| Cancer | C41     | ICD10 | Malignant neoplasm of bone and articular cartilage of other and unspecified sites |
| Cancer | C41.0   | ICD10 | Malignant neoplasm of bones of skull and face                                     |
| Cancer | C41.1   | ICD10 | Malignant neoplasm of mandible                                                    |
| Cancer | C41.2   | ICD10 | Malignant neoplasm of vertebral column                                            |
| Cancer | C41.3   | ICD10 | Malignant neoplasm of ribs                                                        |
| Cancer | C41.4   | ICD10 | Malignant neoplasm of pelvic bones                                                |
| Cancer | C41.9   | ICD10 | Malignant neoplasm of bone and articular cartilage                                |
| Cancer | C44.0   | ICD10 | Other and unspecified malignant neoplasm of skin of lip                           |
| Cancer | C44.00  | ICD10 | Unspecified malignant neoplasm of skin of lip                                     |
| Cancer | C44.09  | ICD10 | Other specified malignant neoplasm of skin of lip                                 |
| Cancer | C44.1   | ICD10 | Other and unspecified malignant neoplasm of skin of eyelid                        |
| Cancer | C44.10  | ICD10 | Unspecified malignant neoplasm of skin of eyelid                                  |
| Cancer | C44.101 | ICD10 | Unspecified malignant neoplasm of skin of unspecified eyelid                      |
| Cancer | C44.102 | ICD10 | Unspecified malignant neoplasm of skin of right eyelid                            |
| Cancer | C44.109 | ICD10 | Unspecified malignant neoplasm of skin of left eyelid                             |
| Cancer | C44.11  | ICD10 | Basal cell carcinoma of skin of eyelid                                            |
| Cancer | C44.12  | ICD10 | Squamous cell carcinoma of skin of eyelid                                         |
| Cancer | C44.19  | ICD10 | Other specified malignant neoplasm of skin of eyelid                              |
| Cancer | C44.191 | ICD10 | Other specified malignant neoplasm of skin of unspecified eyelid                  |
| Cancer | C44.192 | ICD10 | Other specified malignant neoplasm of skin of right eyelid                        |
| Cancer | C44.199 | ICD10 | Other specified malignant neoplasm of skin of left eyelid                         |

|        |         |       |                                                                                            |
|--------|---------|-------|--------------------------------------------------------------------------------------------|
| Cancer | C44.2   | ICD10 | Other and unspecified malignant neoplasm of skin of ear and external auricular canal       |
| Cancer | C44.20  | ICD10 | Unspecified malignant neoplasm of skin of ear and external auricular canal                 |
| Cancer | C44.201 | ICD10 | Unspecified malignant neoplasm of skin of unspecified ear and external auricular canal     |
| Cancer | C44.202 | ICD10 | Unspecified malignant neoplasm of skin of right ear and external auricular canal           |
| Cancer | C44.209 | ICD10 | Unspecified malignant neoplasm of skin of left ear and external auricular canal            |
| Cancer | C44.21  | ICD10 | Basal cell carcinoma of skin of ear and external auricular canal                           |
| Cancer | C44.22  | ICD10 | Squamous cell carcinoma of skin of ear and external auricular canal                        |
| Cancer | C44.29  | ICD10 | Other specified malignant neoplasm of skin of ear and external auricular canal             |
| Cancer | C44.291 | ICD10 | Other specified malignant neoplasm of skin of unspecified ear and external auricular canal |
| Cancer | C44.292 | ICD10 | Other specified malignant neoplasm of skin of right ear and external auricular canal       |
| Cancer | C44.299 | ICD10 | Other specified malignant neoplasm of skin of left ear and external auricular canal        |
| Cancer | C44.30  | ICD10 | Unspecified malignant neoplasm of skin of other and unspecified parts of face              |
| Cancer | C44.300 | ICD10 | Unspecified malignant neoplasm of skin of unspecified part of face                         |
| Cancer | C44.301 | ICD10 | Unspecified malignant neoplasm of skin of nose                                             |
| Cancer | C44.309 | ICD10 | Unspecified malignant neoplasm of skin of other parts of face                              |
| Cancer | C44.31  | ICD10 | Basal cell carcinoma of skin of other and unspecified parts of face                        |
| Cancer | C44.39  | ICD10 | Other specified malignant neoplasm of skin of other and unspecified parts of face          |

|        |         |       |                                                                         |
|--------|---------|-------|-------------------------------------------------------------------------|
| Cancer | C44.390 | ICD10 | Other specified malignant neoplasm of skin of unspecified parts of face |
| Cancer | C44.391 | ICD10 | Other specified malignant neoplasm of skin of nose                      |
| Cancer | C44.399 | ICD10 | Other specified malignant neoplasm of skin of other parts of face       |
| Cancer | C44.4   | ICD10 | Other and unspecified malignant neoplasm of skin of scalp and neck      |
| Cancer | C44.40  | ICD10 | Unspecified malignant neoplasm of skin of scalp and neck                |
| Cancer | C44.49  | ICD10 | Other specified malignant neoplasm of skin of scalp and neck            |
| Cancer | C44.500 | ICD10 | Unspecified malignant neoplasm of anal skin                             |
| Cancer | C44.501 | ICD10 | Unspecified malignant neoplasm of skin of breast                        |
| Cancer | C44.509 | ICD10 | Unspecified malignant neoplasm of skin of other part of trunk           |
| Cancer | C44.51  | ICD10 | Basal cell carcinoma of skin of trunk                                   |
| Cancer | C44.52  | ICD10 | Squamous cell carcinoma of skin of trunk                                |
| Cancer | C44.59  | ICD10 | Other specified malignant neoplasm of skin of trunk                     |
| Cancer | C44.590 | ICD10 | Other specified malignant neoplasm of anal skin                         |
| Cancer | C44.591 | ICD10 | Other specified malignant neoplasm of skin of breast                    |
| Cancer | C44.599 | ICD10 | Other specified malignant neoplasm of skin of other part of trunk       |
| Cancer | C44.6   | ICD10 | Other and unspecified malignant neoplasm of skin of upper limb          |
| Cancer | C44.60  | ICD10 | Unspecified malignant neoplasm of skin of upper limb                    |
| Cancer | C44.601 | ICD10 | Unspecified malignant neoplasm of skin of unspecified upper limb        |
| Cancer | C44.602 | ICD10 | Unspecified malignant neoplasm of skin of right upper limb              |
| Cancer | C44.609 | ICD10 | Unspecified malignant neoplasm of skin of left upper limb               |
| Cancer | C44.61  | ICD10 | Basal cell carcinoma of skin of upper limb                              |



|        |         |       |                                                                       |
|--------|---------|-------|-----------------------------------------------------------------------|
| Cancer | C44.62  | ICD10 | Squamous cell carcinoma of skin of upper limb                         |
| Cancer | C44.69  | ICD10 | Other specified malignant neoplasm of skin of upper limb              |
| Cancer | C44.691 | ICD10 | Other specified malignant neoplasm of skin of unspecified upper limb  |
| Cancer | C44.692 | ICD10 | Other specified malignant neoplasm of skin of right upper limb        |
| Cancer | C44.699 | ICD10 | Other specified malignant neoplasm of skin of left upper limb         |
| Cancer | C44.7   | ICD10 | Other and unspecified malignant neoplasm of skin of lower limb        |
| Cancer | C44.70  | ICD10 | Unspecified malignant neoplasm of skin of lower limb                  |
| Cancer | C44.701 | ICD10 | Unspecified malignant neoplasm of skin of unspecified lower limb      |
| Cancer | C44.702 | ICD10 | Unspecified malignant neoplasm of skin of right lower limb            |
| Cancer | C44.709 | ICD10 | Unspecified malignant neoplasm of skin of left lower limb             |
| Cancer | C44.71  | ICD10 | Basal cell carcinoma of skin of lower limb                            |
| Cancer | C44.72  | ICD10 | Squamous cell carcinoma of skin of lower limb                         |
| Cancer | C44.79  | ICD10 | Other specified malignant neoplasm of skin of lower limb              |
| Cancer | C44.791 | ICD10 | Other specified malignant neoplasm of skin of unspecified lower limb  |
| Cancer | C44.792 | ICD10 | Other specified malignant neoplasm of skin of right lower limb        |
| Cancer | C44.799 | ICD10 | Other specified malignant neoplasm of skin of left lower limb         |
| Cancer | C44.8   | ICD10 | Other and unspecified malignant neoplasm of overlapping sites of skin |
| Cancer | C44.80  | ICD10 | Unspecified malignant neoplasm of overlapping sites of skin           |
| Cancer | C44.89  | ICD10 | Other specified malignant neoplasm of overlapping sites of skin       |
| Cancer | C44.9   | ICD10 | Other and unspecified malignant neoplasm of skin                      |

|        |        |       |                                                                                           |
|--------|--------|-------|-------------------------------------------------------------------------------------------|
| Cancer | C44.90 | ICD10 | Unspecified malignant neoplasm of skin                                                    |
| Cancer | C44.99 | ICD10 | Other specified malignant neoplasm of skin                                                |
| Cancer | C45.0  | ICD10 | Mesothelioma of pleura                                                                    |
| Cancer | C45.2  | ICD10 | Mesothelioma of pericardium                                                               |
| Cancer | C47    | ICD10 | Malignant neoplasm of peripheral nerves and autonomic nervous system                      |
| Cancer | C47.0  | ICD10 | Malignant neoplasm of peripheral nerves of head                                           |
| Cancer | C47.1  | ICD10 | Malignant neoplasm of peripheral nerves of upper limb                                     |
| Cancer | C47.10 | ICD10 | Malignant neoplasm of peripheral nerves of unspecified upper limb                         |
| Cancer | C47.11 | ICD10 | Malignant neoplasm of peripheral nerves of right upper limb                               |
| Cancer | C47.12 | ICD10 | Malignant neoplasm of peripheral nerves of left upper limb                                |
| Cancer | C47.2  | ICD10 | Malignant neoplasm of peripheral nerves of lower limb                                     |
| Cancer | C47.20 | ICD10 | Malignant neoplasm of peripheral nerves of unspecified lower limb                         |
| Cancer | C47.21 | ICD10 | Malignant neoplasm of peripheral nerves of right lower limb                               |
| Cancer | C47.22 | ICD10 | Malignant neoplasm of peripheral nerves of left lower limb                                |
| Cancer | C47.3  | ICD10 | Malignant neoplasm of peripheral nerves of thorax                                         |
| Cancer | C47.4  | ICD10 | Malignant neoplasm of peripheral nerves of abdomen                                        |
| Cancer | C47.5  | ICD10 | Malignant neoplasm of peripheral nerves of pelvis                                         |
| Cancer | C47.6  | ICD10 | Malignant neoplasm of peripheral nerves of trunk                                          |
| Cancer | C47.8  | ICD10 | Malignant neoplasm of overlapping sites of peripheral nerves and autonomic nervous system |
| Cancer | C47.9  | ICD10 | Malignant neoplasm of peripheral nerves and autonomic nervous system                      |
| Cancer | C49.0  | ICD10 | Malignant neoplasm of other connective and soft tissue                                    |

|        |        |       |                                                                            |
|--------|--------|-------|----------------------------------------------------------------------------|
| Cancer | C49.0  | ICD10 | Malignant neoplasm of connective and soft tissue of head                   |
| Cancer | C49.1  | ICD10 | Malignant neoplasm of connective and soft tissue of upper limb             |
| Cancer | C49.10 | ICD10 | Malignant neoplasm of connective and soft tissue of unspecified upper limb |
| Cancer | C49.11 | ICD10 | Malignant neoplasm of connective and soft tissue of right upper limb       |
| Cancer | C49.12 | ICD10 | Malignant neoplasm of connective and soft tissue of left upper limb        |
| Cancer | C49.2  | ICD10 | Malignant neoplasm of connective and soft tissue of lower limb             |
| Cancer | C49.20 | ICD10 | Malignant neoplasm of connective and soft tissue of unspecified lower limb |
| Cancer | C49.21 | ICD10 | Malignant neoplasm of connective and soft tissue of right lower limb       |
| Cancer | C49.22 | ICD10 | Malignant neoplasm of connective and soft tissue of left lower limb        |
| Cancer | C49.3  | ICD10 | Malignant neoplasm of connective and soft tissue of thorax                 |
| Cancer | C49.4  | ICD10 | Malignant neoplasm of connective and soft tissue of abdomen                |
| Cancer | C49.5  | ICD10 | Malignant neoplasm of connective and soft tissue of pelvis                 |
| Cancer | C49.6  | ICD10 | Malignant neoplasm of connective and soft tissue of trunk                  |
| Cancer | C49.8  | ICD10 | Malignant neoplasm of overlapping sites of connective and soft tissue      |
| Cancer | C49.9  | ICD10 | Malignant neoplasm of connective and soft tissue                           |
| Cancer | C49.A  | ICD10 | Gastrointestinal stromal tumor                                             |
| Cancer | C49.A0 | ICD10 | Gastrointestinal stromal tumor                                             |
| Cancer | C49.A1 | ICD10 | Gastrointestinal stromal tumor of esophagus                                |
| Cancer | C49.A2 | ICD10 | Gastrointestinal stromal tumor of stomach                                  |
| Cancer | C49.A3 | ICD10 | Gastrointestinal stromal tumor of small intestine                          |
| Cancer | C49.A4 | ICD10 | Gastrointestinal stromal tumor of large intestine                          |

|        |        |       |                                                                       |
|--------|--------|-------|-----------------------------------------------------------------------|
| Cancer | C49.A5 | ICD10 | Gastrointestinal stromal tumor of rectum                              |
| Cancer | C49.A9 | ICD10 | Gastrointestinal stromal tumor of other sites                         |
| Cancer | C4A    | ICD10 | Merkel cell carcinoma                                                 |
| Cancer | C4A.0  | ICD10 | Merkel cell carcinoma of lip                                          |
| Cancer | C4A.1  | ICD10 | Merkel cell carcinoma of eyelid                                       |
| Cancer | C4A.10 | ICD10 | Merkel cell carcinoma of unspecified eyelid                           |
| Cancer | C4A.11 | ICD10 | Merkel cell carcinoma of right eyelid                                 |
| Cancer | C4A.12 | ICD10 | Merkel cell carcinoma of left eyelid                                  |
| Cancer | C4A.2  | ICD10 | Merkel cell carcinoma of ear and external auricular canal             |
| Cancer | C4A.20 | ICD10 | Merkel cell carcinoma of unspecified ear and external auricular canal |
| Cancer | C4A.21 | ICD10 | Merkel cell carcinoma of right ear and external auricular canal       |
| Cancer | C4A.22 | ICD10 | Merkel cell carcinoma of left ear and external auricular canal        |
| Cancer | C4A.3  | ICD10 | Merkel cell carcinoma of other and unspecified parts of face          |
| Cancer | C4A.30 | ICD10 | Merkel cell carcinoma of unspecified part of face                     |
| Cancer | C4A.31 | ICD10 | Merkel cell carcinoma of nose                                         |
| Cancer | C4A.39 | ICD10 | Merkel cell carcinoma of other parts of face                          |
| Cancer | C4A.4  | ICD10 | Merkel cell carcinoma of scalp and neck                               |
| Cancer | C4A.5  | ICD10 | Merkel cell carcinoma of trunk                                        |
| Cancer | C4A.51 | ICD10 | Merkel cell carcinoma of anal skin                                    |
| Cancer | C4A.52 | ICD10 | Merkel cell carcinoma of skin of breast                               |
| Cancer | C4A.59 | ICD10 | Merkel cell carcinoma of other part of trunk                          |
| Cancer | C4A.6  | ICD10 | Merkel cell carcinoma of upper limb                                   |
| Cancer | C4A.60 | ICD10 | Merkel cell carcinoma of unspecified upper limb                       |
| Cancer | C4A.61 | ICD10 | Merkel cell carcinoma of right upper limb                             |
| Cancer | C4A.62 | ICD10 | Merkel cell carcinoma of left upper limb                              |
| Cancer | C4A.7  | ICD10 | Merkel cell carcinoma of lower limb                                   |

|        |         |       |                                                                       |
|--------|---------|-------|-----------------------------------------------------------------------|
| Cancer | C4A.70  | ICD10 | Merkel cell carcinoma of unspecified lower limb                       |
| Cancer | C4A.71  | ICD10 | Merkel cell carcinoma of right lower limb                             |
| Cancer | C4A.72  | ICD10 | Merkel cell carcinoma of left lower limb                              |
| Cancer | C4A.8   | ICD10 | Merkel cell carcinoma of overlapping sites                            |
| Cancer | C4A.9   | ICD10 | Merkel cell carcinoma                                                 |
| Cancer | C50.02  | ICD10 | Malignant neoplasm of nipple and areola                               |
| Cancer | C50.021 | ICD10 | Malignant neoplasm of nipple and areola                               |
| Cancer | C50.022 | ICD10 | Malignant neoplasm of nipple and areola                               |
| Cancer | C50.029 | ICD10 | Malignant neoplasm of nipple and areola                               |
| Cancer | C50.12  | ICD10 | Malignant neoplasm of central portion of breast                       |
| Cancer | C50.121 | ICD10 | Malignant neoplasm of central portion of right male breast            |
| Cancer | C50.122 | ICD10 | Malignant neoplasm of central portion of left male breast             |
| Cancer | C50.129 | ICD10 | Malignant neoplasm of central portion of unspecified male breast      |
| Cancer | C50.22  | ICD10 | Malignant neoplasm of upper-inner quadrant of breast                  |
| Cancer | C50.221 | ICD10 | Malignant neoplasm of upper-inner quadrant of right male breast       |
| Cancer | C50.222 | ICD10 | Malignant neoplasm of upper-inner quadrant of left male breast        |
| Cancer | C50.229 | ICD10 | Malignant neoplasm of upper-inner quadrant of unspecified male breast |
| Cancer | C50.32  | ICD10 | Malignant neoplasm of lower-inner quadrant of breast                  |
| Cancer | C50.321 | ICD10 | Malignant neoplasm of lower-inner quadrant of right male breast       |
| Cancer | C50.322 | ICD10 | Malignant neoplasm of lower-inner quadrant of left male breast        |
| Cancer | C50.329 | ICD10 | Malignant neoplasm of lower-inner quadrant of unspecified male breast |
| Cancer | C50.42  | ICD10 | Malignant neoplasm of upper-outer quadrant of breast                  |
| Cancer | C50.421 | ICD10 | Malignant neoplasm of upper-outer quadrant of right male breast       |

|        |         |       |                                                                       |
|--------|---------|-------|-----------------------------------------------------------------------|
| Cancer | C50.422 | ICD10 | Malignant neoplasm of upper-outer quadrant of left male breast        |
| Cancer | C50.429 | ICD10 | Malignant neoplasm of upper-outer quadrant of unspecified male breast |
| Cancer | C50.52  | ICD10 | Malignant neoplasm of lower-outer quadrant of breast                  |
| Cancer | C50.521 | ICD10 | Malignant neoplasm of lower-outer quadrant of right male breast       |
| Cancer | C50.522 | ICD10 | Malignant neoplasm of lower-outer quadrant of left male breast        |
| Cancer | C50.529 | ICD10 | Malignant neoplasm of lower-outer quadrant of unspecified male breast |
| Cancer | C50.62  | ICD10 | Malignant neoplasm of axillary tail of breast                         |
| Cancer | C50.621 | ICD10 | Malignant neoplasm of axillary tail of right male breast              |
| Cancer | C50.622 | ICD10 | Malignant neoplasm of axillary tail of left male breast               |
| Cancer | C50.629 | ICD10 | Malignant neoplasm of axillary tail of unspecified male breast        |
| Cancer | C50.82  | ICD10 | Malignant neoplasm of overlapping sites of breast                     |
| Cancer | C50.821 | ICD10 | Malignant neoplasm of overlapping sites of right male breast          |
| Cancer | C50.822 | ICD10 | Malignant neoplasm of overlapping sites of left male breast           |
| Cancer | C50.829 | ICD10 | Malignant neoplasm of overlapping sites of unspecified male breast    |
| Cancer | C50.92  | ICD10 | Malignant neoplasm of breast of unspecified site                      |
| Cancer | C50.921 | ICD10 | Malignant neoplasm of unspecified site of right male breast           |
| Cancer | C50.922 | ICD10 | Malignant neoplasm of unspecified site of left male breast            |
| Cancer | C50.929 | ICD10 | Malignant neoplasm of unspecified site of unspecified male breast     |
| Cancer | C51     | ICD10 | Malignant neoplasm of vulva                                           |
| Cancer | C51.0   | ICD10 | Malignant neoplasm of labium majus                                    |
| Cancer | C51.1   | ICD10 | Malignant neoplasm of labium minus                                    |
| Cancer | C51.2   | ICD10 | Malignant neoplasm of clitoris                                        |

|        |        |       |                                                           |
|--------|--------|-------|-----------------------------------------------------------|
| Cancer | C51.9  | ICD10 | Malignant neoplasm of vulva                               |
| Cancer | C52    | ICD10 | Malignant neoplasm of vagina                              |
| Cancer | C53    | ICD10 | Malignant neoplasm of cervix uteri                        |
| Cancer | C53.0  | ICD10 | Malignant neoplasm of endocervix                          |
| Cancer | C53.1  | ICD10 | Malignant neoplasm of exocervix                           |
| Cancer | C53.8  | ICD10 | Malignant neoplasm of overlapping sites of cervix uteri   |
| Cancer | C53.9  | ICD10 | Malignant neoplasm of cervix uteri                        |
| Cancer | C61    | ICD10 | Malignant neoplasm of prostate                            |
| Cancer | C69    | ICD10 | Malignant neoplasm of eye and adnexa                      |
| Cancer | C69.0  | ICD10 | Malignant neoplasm of conjunctiva                         |
| Cancer | C69.00 | ICD10 | Malignant neoplasm of unspecified conjunctiva             |
| Cancer | C69.01 | ICD10 | Malignant neoplasm of right conjunctiva                   |
| Cancer | C69.02 | ICD10 | Malignant neoplasm of left conjunctiva                    |
| Cancer | C69.1  | ICD10 | Malignant neoplasm of cornea                              |
| Cancer | C69.10 | ICD10 | Malignant neoplasm of unspecified cornea                  |
| Cancer | C69.11 | ICD10 | Malignant neoplasm of right cornea                        |
| Cancer | C69.12 | ICD10 | Malignant neoplasm of left cornea                         |
| Cancer | C69.2  | ICD10 | Malignant neoplasm of retina                              |
| Cancer | C69.20 | ICD10 | Malignant neoplasm of unspecified retina                  |
| Cancer | C69.21 | ICD10 | Malignant neoplasm of right retina                        |
| Cancer | C69.22 | ICD10 | Malignant neoplasm of left retina                         |
| Cancer | C69.3  | ICD10 | Malignant neoplasm of choroid                             |
| Cancer | C69.30 | ICD10 | Malignant neoplasm of unspecified choroid                 |
| Cancer | C69.31 | ICD10 | Malignant neoplasm of right choroid                       |
| Cancer | C69.32 | ICD10 | Malignant neoplasm of left choroid                        |
| Cancer | C69.4  | ICD10 | Malignant neoplasm of ciliary body                        |
| Cancer | C69.40 | ICD10 | Malignant neoplasm of unspecified ciliary body            |
| Cancer | C69.41 | ICD10 | Malignant neoplasm of right ciliary body                  |
| Cancer | C69.42 | ICD10 | Malignant neoplasm of left ciliary body                   |
| Cancer | C69.5  | ICD10 | Malignant neoplasm of lacrimal gland and duct             |
| Cancer | C69.50 | ICD10 | Malignant neoplasm of unspecified lacrimal gland and duct |

|        |        |       |                                                                       |
|--------|--------|-------|-----------------------------------------------------------------------|
| Cancer | C69.51 | ICD10 | Malignant neoplasm of right lacrimal gland and duct                   |
| Cancer | C69.52 | ICD10 | Malignant neoplasm of left lacrimal gland and duct                    |
| Cancer | C69.6  | ICD10 | Malignant neoplasm of orbit                                           |
| Cancer | C69.60 | ICD10 | Malignant neoplasm of unspecified orbit                               |
| Cancer | C69.61 | ICD10 | Malignant neoplasm of right orbit                                     |
| Cancer | C69.62 | ICD10 | Malignant neoplasm of left orbit                                      |
| Cancer | C69.8  | ICD10 | Malignant neoplasm of overlapping sites of eye and adnexa             |
| Cancer | C69.80 | ICD10 | Malignant neoplasm of overlapping sites of unspecified eye and adnexa |
| Cancer | C69.81 | ICD10 | Malignant neoplasm of overlapping sites of right eye and adnexa       |
| Cancer | C69.82 | ICD10 | Malignant neoplasm of overlapping sites of left eye and adnexa        |
| Cancer | C69.9  | ICD10 | Malignant neoplasm of unspecified site of eye                         |
| Cancer | C69.90 | ICD10 | Malignant neoplasm of unspecified site of unspecified eye             |
| Cancer | C69.91 | ICD10 | Malignant neoplasm of unspecified site of right eye                   |
| Cancer | C69.92 | ICD10 | Malignant neoplasm of unspecified site of left eye                    |
| Cancer | C70    | ICD10 | Malignant neoplasm of meninges                                        |
| Cancer | C70.0  | ICD10 | Malignant neoplasm of cerebral meninges                               |
| Cancer | C70.1  | ICD10 | Malignant neoplasm of spinal meninges                                 |
| Cancer | C70.9  | ICD10 | Malignant neoplasm of meninges                                        |
| Cancer | C71    | ICD10 | Malignant neoplasm of brain                                           |
| Cancer | C71.0  | ICD10 | Malignant neoplasm of cerebrum                                        |
| Cancer | C71.1  | ICD10 | Malignant neoplasm of frontal lobe                                    |
| Cancer | C71.2  | ICD10 | Malignant neoplasm of temporal lobe                                   |
| Cancer | C71.3  | ICD10 | Malignant neoplasm of parietal lobe                                   |
| Cancer | C71.4  | ICD10 | Malignant neoplasm of occipital lobe                                  |
| Cancer | C71.5  | ICD10 | Malignant neoplasm of cerebral ventricle                              |
| Cancer | C71.6  | ICD10 | Malignant neoplasm of cerebellum                                      |
| Cancer | C71.7  | ICD10 | Malignant neoplasm of brain stem                                      |
| Cancer | C71.8  | ICD10 | Malignant neoplasm of overlapping sites of brain                      |



|        |        |       |                                                            |
|--------|--------|-------|------------------------------------------------------------|
| Cancer | C71.9  | ICD10 | Malignant neoplasm of brain                                |
| Cancer | C72    | ICD10 | Malignant neoplasm of spinal cord                          |
| Cancer | C72.0  | ICD10 | Malignant neoplasm of spinal cord                          |
| Cancer | C72.1  | ICD10 | Malignant neoplasm of cauda equina                         |
| Cancer | C72.2  | ICD10 | Malignant neoplasm of olfactory nerve                      |
| Cancer | C72.20 | ICD10 | Malignant neoplasm of unspecified olfactory nerve          |
| Cancer | C72.21 | ICD10 | Malignant neoplasm of right olfactory nerve                |
| Cancer | C72.22 | ICD10 | Malignant neoplasm of left olfactory nerve                 |
| Cancer | C72.3  | ICD10 | Malignant neoplasm of optic nerve                          |
| Cancer | C72.30 | ICD10 | Malignant neoplasm of unspecified optic nerve              |
| Cancer | C72.31 | ICD10 | Malignant neoplasm of right optic nerve                    |
| Cancer | C72.32 | ICD10 | Malignant neoplasm of left optic nerve                     |
| Cancer | C72.4  | ICD10 | Malignant neoplasm of acoustic nerve                       |
| Cancer | C72.40 | ICD10 | Malignant neoplasm of unspecified acoustic nerve           |
| Cancer | C72.41 | ICD10 | Malignant neoplasm of right acoustic nerve                 |
| Cancer | C72.42 | ICD10 | Malignant neoplasm of left acoustic nerve                  |
| Cancer | C72.5  | ICD10 | Malignant neoplasm of other and unspecified cranial nerves |
| Cancer | C72.50 | ICD10 | Malignant neoplasm of unspecified cranial nerve            |
| Cancer | C72.59 | ICD10 | Malignant neoplasm of other cranial nerves                 |
| Cancer | C72.9  | ICD10 | Malignant neoplasm of central nervous system               |
| Cancer | C73    | ICD10 | Malignant neoplasm of thyroid gland                        |
| Cancer | C74    | ICD10 | Malignant neoplasm of adrenal gland                        |
| Cancer | C74.0  | ICD10 | Malignant neoplasm of cortex of adrenal gland              |
| Cancer | C74.00 | ICD10 | Malignant neoplasm of cortex of unspecified adrenal gland  |
| Cancer | C74.01 | ICD10 | Malignant neoplasm of cortex of right adrenal gland        |

|        |         |       |                                                                     |
|--------|---------|-------|---------------------------------------------------------------------|
| Cancer | C74.02  | ICD10 | Malignant neoplasm of cortex of left adrenal gland                  |
| Cancer | C74.1   | ICD10 | Malignant neoplasm of medulla of adrenal gland                      |
| Cancer | C74.10  | ICD10 | Malignant neoplasm of medulla of unspecified adrenal gland          |
| Cancer | C74.11  | ICD10 | Malignant neoplasm of medulla of right adrenal gland                |
| Cancer | C74.12  | ICD10 | Malignant neoplasm of medulla of left adrenal gland                 |
| Cancer | C74.9   | ICD10 | Malignant neoplasm of unspecified part of adrenal gland             |
| Cancer | C74.90  | ICD10 | Malignant neoplasm of unspecified part of unspecified adrenal gland |
| Cancer | C74.91  | ICD10 | Malignant neoplasm of unspecified part of right adrenal gland       |
| Cancer | C74.92  | ICD10 | Malignant neoplasm of unspecified part of left adrenal gland        |
| Cancer | C75     | ICD10 | Malignant neoplasm of other endocrine glands and related structures |
| Cancer | C75.0   | ICD10 | Malignant neoplasm of parathyroid gland                             |
| Cancer | C75.1   | ICD10 | Malignant neoplasm of pituitary gland                               |
| Cancer | C75.2   | ICD10 | Malignant neoplasm of craniopharyngeal duct                         |
| Cancer | C75.3   | ICD10 | Malignant neoplasm of pineal gland                                  |
| Cancer | C75.4   | ICD10 | Malignant neoplasm of carotid body                                  |
| Cancer | C75.5   | ICD10 | Malignant neoplasm of aortic body and other paraganglia             |
| Cancer | C75.8   | ICD10 | Malignant neoplasm with pluriglandular involvement                  |
| Cancer | C75.9   | ICD10 | Malignant neoplasm of endocrine gland                               |
| Cancer | C76.1   | ICD10 | Malignant neoplasm of thorax                                        |
| Cancer | C7A.0   | ICD10 | Malignant carcinoid tumors                                          |
| Cancer | C7A.0   | ICD10 | Malignant carcinoid tumors                                          |
| Cancer | C7A.0   | ICD10 | Malignant carcinoid tumors                                          |
| Cancer | C7A.00  | ICD10 | Malignant carcinoid tumor of unspecified site                       |
| Cancer | C7A.020 | ICD10 | Malignant carcinoid tumor of the appendix                           |

|        |         |       |                                                                           |
|--------|---------|-------|---------------------------------------------------------------------------|
| Cancer | C7A.021 | ICD10 | Malignant carcinoid tumor of the cecum                                    |
| Cancer | C7A.022 | ICD10 | Malignant carcinoid tumor of the ascending colon                          |
| Cancer | C7A.023 | ICD10 | Malignant carcinoid tumor of the transverse colon                         |
| Cancer | C7A.024 | ICD10 | Malignant carcinoid tumor of the descending colon                         |
| Cancer | C7A.025 | ICD10 | Malignant carcinoid tumor of the sigmoid colon                            |
| Cancer | C7A.029 | ICD10 | Malignant carcinoid tumor of the large intestine                          |
| Cancer | C7A.090 | ICD10 | Malignant carcinoid tumor of the bronchus and lung                        |
| Cancer | C7A.091 | ICD10 | Malignant carcinoid tumor of the thymus                                   |
| Cancer | C7A.092 | ICD10 | Malignant carcinoid tumor of the stomach                                  |
| Cancer | C7A.093 | ICD10 | Malignant carcinoid tumor of the kidney                                   |
| Cancer | C7A.098 | ICD10 | Malignant carcinoid tumors of other sites                                 |
| Cancer | C7A.1   | ICD10 | Malignant poorly differentiated neuroendocrine tumors                     |
| Cancer | C7A.8   | ICD10 | Other malignant neuroendocrine tumors                                     |
| Cancer | C7B.00  | ICD10 | Secondary carcinoid tumors                                                |
| Cancer | C7B.1   | ICD10 | Secondary Merkel cell carcinoma                                           |
| Cancer | C96.0   | ICD10 | Multifocal and multisystemic (disseminated) Langerhans-cell histiocytosis |
| Cancer | C96.2   | ICD10 | Malignant mast cell neoplasm                                              |
| Cancer | C96.22  | ICD10 | Mast cell sarcoma                                                         |
| Cancer | C96.A   | ICD10 | Histiocytic sarcoma                                                       |
| Cancer | D00.0   | ICD10 | Carcinoma in situ of lip                                                  |
| Cancer | D00.00  | ICD10 | Carcinoma in situ of oral cavity                                          |
| Cancer | D00.01  | ICD10 | Carcinoma in situ of labial mucosa and vermilion border                   |
| Cancer | D00.02  | ICD10 | Carcinoma in situ of buccal mucosa                                        |
| Cancer | D00.03  | ICD10 | Carcinoma in situ of gingiva and edentulous alveolar ridge                |
| Cancer | D00.04  | ICD10 | Carcinoma in situ of soft palate                                          |
| Cancer | D00.05  | ICD10 | Carcinoma in situ of hard palate                                          |
| Cancer | D00.06  | ICD10 | Carcinoma in situ of floor of mouth                                       |

|        |        |       |                                                                 |
|--------|--------|-------|-----------------------------------------------------------------|
| Cancer | D00.07 | ICD10 | Carcinoma in situ of tongue                                     |
| Cancer | D00.08 | ICD10 | Carcinoma in situ of pharynx                                    |
| Cancer | D00.1  | ICD10 | Carcinoma in situ of esophagus                                  |
| Cancer | D00.2  | ICD10 | Carcinoma in situ of stomach                                    |
| Cancer | D01.0  | ICD10 | Carcinoma in situ of colon                                      |
| Cancer | D01.5  | ICD10 | Carcinoma in situ of liver                                      |
| Cancer | D02.0  | ICD10 | Carcinoma in situ of larynx                                     |
| Cancer | D02.1  | ICD10 | Carcinoma in situ of trachea                                    |
| Cancer | D02.2  | ICD10 | Carcinoma in situ of bronchus and lung                          |
| Cancer | D02.20 | ICD10 | Carcinoma in situ of unspecified bronchus and lung              |
| Cancer | D02.21 | ICD10 | Carcinoma in situ of right bronchus and lung                    |
| Cancer | D02.22 | ICD10 | Carcinoma in situ of left bronchus and lung                     |
| Cancer | D02.3  | ICD10 | Carcinoma in situ of other parts of respiratory system          |
| Cancer | D02.4  | ICD10 | Carcinoma in situ of respiratory system                         |
| Cancer | D05    | ICD10 | Carcinoma in situ of breast                                     |
| Cancer | D05.0  | ICD10 | Lobular carcinoma in situ of breast                             |
| Cancer | D05.00 | ICD10 | Lobular carcinoma in situ of unspecified breast                 |
| Cancer | D05.01 | ICD10 | Lobular carcinoma in situ of right breast                       |
| Cancer | D05.02 | ICD10 | Lobular carcinoma in situ of left breast                        |
| Cancer | D05.1  | ICD10 | Intraductal carcinoma in situ of breast                         |
| Cancer | D05.10 | ICD10 | Intraductal carcinoma in situ of unspecified breast             |
| Cancer | D05.11 | ICD10 | Intraductal carcinoma in situ of right breast                   |
| Cancer | D05.12 | ICD10 | Intraductal carcinoma in situ of left breast                    |
| Cancer | D05.8  | ICD10 | Other specified type of carcinoma in situ of breast             |
| Cancer | D05.80 | ICD10 | Other specified type of carcinoma in situ of unspecified breast |
| Cancer | D05.81 | ICD10 | Other specified type of carcinoma in situ of right breast       |
| Cancer | D05.82 | ICD10 | Other specified type of carcinoma in situ of left breast        |

|        |        |       |                                                                  |
|--------|--------|-------|------------------------------------------------------------------|
| Cancer | D05.9  | ICD10 | Unspecified type of carcinoma in situ of breast                  |
| Cancer | D05.90 | ICD10 | Unspecified type of carcinoma in situ of unspecified breast      |
| Cancer | D05.91 | ICD10 | Unspecified type of carcinoma in situ of right breast            |
| Cancer | D05.92 | ICD10 | Unspecified type of carcinoma in situ of left breast             |
| Cancer | D07.1  | ICD10 | Carcinoma in situ of vulva                                       |
| Cancer | D07.2  | ICD10 | Carcinoma in situ of vagina                                      |
| Cancer | D07.3  | ICD10 | Carcinoma in situ of other and unspecified female genital organs |
| Cancer | D07.30 | ICD10 | Carcinoma in situ of unspecified female genital organs           |
| Cancer | D07.39 | ICD10 | Carcinoma in situ of other female genital organs                 |
| Cancer | D07.4  | ICD10 | Carcinoma in situ of penis                                       |
| Cancer | D07.5  | ICD10 | Carcinoma in situ of prostate                                    |
| Cancer | D07.6  | ICD10 | Carcinoma in situ of other and unspecified male genital organs   |
| Cancer | D07.60 | ICD10 | Carcinoma in situ of unspecified male genital organs             |
| Cancer | D07.61 | ICD10 | Carcinoma in situ of scrotum                                     |
| Cancer | D07.69 | ICD10 | Carcinoma in situ of other male genital organs                   |
| Cancer | D09    | ICD10 | Carcinoma in situ of other and unspecified sites                 |
| Cancer | D09.0  | ICD10 | Carcinoma in situ of bladder                                     |
| Cancer | D09.1  | ICD10 | Carcinoma in situ of other and unspecified urinary organs        |
| Cancer | D09.10 | ICD10 | Carcinoma in situ of unspecified urinary organ                   |
| Cancer | D09.19 | ICD10 | Carcinoma in situ of other urinary organs                        |
| Cancer | D09.2  | ICD10 | Carcinoma in situ of eye                                         |
| Cancer | D09.20 | ICD10 | Carcinoma in situ of unspecified eye                             |
| Cancer | D09.21 | ICD10 | Carcinoma in situ of right eye                                   |
| Cancer | D09.22 | ICD10 | Carcinoma in situ of left eye                                    |
| Cancer | D09.3  | ICD10 | Carcinoma in situ of thyroid and other endocrine glands          |
| Cancer | D09.8  | ICD10 | Carcinoma in situ of other specified sites                       |

|        |         |       |                                                                         |
|--------|---------|-------|-------------------------------------------------------------------------|
| Cancer | D09.9   | ICD10 | Carcinoma in situ                                                       |
| Cancer | D39     | ICD10 | Neoplasm of uncertain behavior of female genital organs                 |
| Cancer | D39.0   | ICD10 | Neoplasm of uncertain behavior of uterus                                |
| Cancer | D39.1   | ICD10 | Neoplasm of uncertain behavior of ovary                                 |
| Cancer | D39.10  | ICD10 | Neoplasm of uncertain behavior of unspecified ovary                     |
| Cancer | D39.11  | ICD10 | Neoplasm of uncertain behavior of right ovary                           |
| Cancer | D39.12  | ICD10 | Neoplasm of uncertain behavior of left ovary                            |
| Cancer | D39.2   | ICD10 | Neoplasm of uncertain behavior of placenta                              |
| Cancer | D39.8   | ICD10 | Neoplasm of uncertain behavior of other specified female genital organs |
| Cancer | D39.9   | ICD10 | Neoplasm of uncertain behavior of female genital organ                  |
| Cancer | D41.4   | ICD10 | Neoplasm of uncertain behavior of bladder                               |
| Cancer | D49.4   | ICD10 | Neoplasm of unspecified behavior of bladder                             |
| Cancer | G89.3   | ICD10 | Neoplasm related pain (acute) (chronic)                                 |
| Cancer | M90.6   | ICD10 | Osteitis deformans in neoplastic diseases                               |
| Cancer | N90.3   | ICD10 | Dysplasia of vulva                                                      |
| Cancer | R97.1   | ICD10 | Elevated cancer antigen 125 [CA 125]                                    |
| Cancer | Z85.01  | ICD10 | Personal history of malignant neoplasm of esophagus                     |
| Cancer | Z85.02  | ICD10 | Personal history of malignant neoplasm of stomach                       |
| Cancer | Z85.020 | ICD10 | Personal history of malignant carcinoid tumor of stomach                |
| Cancer | Z85.028 | ICD10 | Personal history of other malignant neoplasm of stomach                 |
| Cancer | Z85.03  | ICD10 | Personal history of malignant neoplasm of large intestine               |
| Cancer | Z85.030 | ICD10 | Personal history of malignant carcinoid tumor of large intestine        |

|        |         |       |                                                                                      |
|--------|---------|-------|--------------------------------------------------------------------------------------|
| Cancer | Z85.038 | ICD10 | Personal history of other malignant neoplasm of large intestine                      |
| Cancer | Z85.07  | ICD10 | Personal history of malignant neoplasm of pancreas                                   |
| Cancer | Z85.1   | ICD10 | Personal history of malignant neoplasm of trachea                                    |
| Cancer | Z85.11  | ICD10 | Personal history of malignant neoplasm of bronchus and lung                          |
| Cancer | Z85.110 | ICD10 | Personal history of malignant carcinoid tumor of bronchus and lung                   |
| Cancer | Z85.118 | ICD10 | Personal history of other malignant neoplasm of bronchus and lung                    |
| Cancer | Z85.12  | ICD10 | Personal history of malignant neoplasm of trachea                                    |
| Cancer | Z85.2   | ICD10 | Personal history of malignant neoplasm of other respiratory and intrathoracic organs |
| Cancer | Z85.20  | ICD10 | Personal history of malignant neoplasm of unspecified respiratory organ              |
| Cancer | Z85.21  | ICD10 | Personal history of malignant neoplasm of larynx                                     |
| Cancer | Z85.22  | ICD10 | Personal history of malignant neoplasm of nasal cavities                             |
| Cancer | Z85.23  | ICD10 | Personal history of malignant neoplasm of thymus                                     |
| Cancer | Z85.230 | ICD10 | Personal history of malignant carcinoid tumor of thymus                              |
| Cancer | Z85.238 | ICD10 | Personal history of other malignant neoplasm of thymus                               |
| Cancer | Z85.29  | ICD10 | Personal history of malignant neoplasm of other respiratory and intrathoracic organs |
| Cancer | Z85.3   | ICD10 | Personal history of malignant neoplasm of breast                                     |
| Cancer | Z85.40  | ICD10 | Personal history of malignant neoplasm of unspecified female genital organ           |
| Cancer | Z85.41  | ICD10 | Personal history of malignant neoplasm of cervix uteri                               |
| Cancer | Z85.44  | ICD10 | Personal history of malignant neoplasm of other female genital organs                |

|        |         |       |                                                                           |
|--------|---------|-------|---------------------------------------------------------------------------|
| Cancer | Z85.45  | ICD10 | Personal history of malignant neoplasm of unspecified male genital organ  |
| Cancer | Z85.46  | ICD10 | Personal history of malignant neoplasm of prostate                        |
| Cancer | Z85.48  | ICD10 | Personal history of malignant neoplasm of epididymis                      |
| Cancer | Z85.49  | ICD10 | Personal history of malignant neoplasm of other male genital organs       |
| Cancer | Z85.5   | ICD10 | Personal history of malignant neoplasm of urinary tract                   |
| Cancer | Z85.50  | ICD10 | Personal history of malignant neoplasm of unspecified urinary tract organ |
| Cancer | Z85.54  | ICD10 | Personal history of malignant neoplasm of ureter                          |
| Cancer | Z85.59  | ICD10 | Personal history of malignant neoplasm of other urinary tract organ       |
| Cancer | Z85.7   | ICD10 | Personal history of other malignant neoplasms of lymphoid                 |
| Cancer | Z85.79  | ICD10 | Personal history of other malignant neoplasms of lymphoid                 |
| Cancer | Z85.81  | ICD10 | Personal history of malignant neoplasm of lip                             |
| Cancer | Z85.810 | ICD10 | Personal history of malignant neoplasm of tongue                          |
| Cancer | Z85.818 | ICD10 | Personal history of malignant neoplasm of other sites of lip              |
| Cancer | Z85.819 | ICD10 | Personal history of malignant neoplasm of unspecified site of lip         |
| Cancer | Z85.83  | ICD10 | Personal history of malignant neoplasm of bone and soft tissue            |
| Cancer | Z85.830 | ICD10 | Personal history of malignant neoplasm of bone                            |
| Cancer | Z85.831 | ICD10 | Personal history of malignant neoplasm of soft tissue                     |
| Cancer | Z85.840 | ICD10 | Personal history of malignant neoplasm of eye                             |
| Cancer | Z85.841 | ICD10 | Personal history of malignant neoplasm of brain                           |
| Cancer | Z85.848 | ICD10 | Personal history of malignant neoplasm of other parts of nervous tissue   |



|                        |         |       |                                                                                                    |
|------------------------|---------|-------|----------------------------------------------------------------------------------------------------|
| Cancer                 | Z85.850 | ICD10 | Personal history of malignant neoplasm of thyroid                                                  |
| Cancer                 | Z85.850 | ICD10 | Personal history of malignant neoplasm of thyroid                                                  |
| Cancer                 | Z85.858 | ICD10 | Personal history of malignant neoplasm of other endocrine glands                                   |
| Chronic kidney disease | 403     | ICD9  | Hypertensive chronic kidney disease                                                                |
| Chronic kidney disease | 403     | ICD9  | Hypertensive chronic kidney disease                                                                |
| Chronic kidney disease | 403     | ICD9  | Hypertensive chronic kidney disease                                                                |
| Chronic kidney disease | 403.01  | ICD9  | Hypertensive renal disease                                                                         |
| Chronic kidney disease | 403.1   | ICD9  | Hypertensive renal disease                                                                         |
| Chronic kidney disease | 403.1   | ICD9  | Hypertensive renal disease                                                                         |
| Chronic kidney disease | 403.11  | ICD9  | Hypertensive renal disease                                                                         |
| Chronic kidney disease | 403.9   | ICD9  | Hypertensive renal disease                                                                         |
| Chronic kidney disease | 403.9   | ICD9  | Hypertensive renal disease                                                                         |
| Chronic kidney disease | 403.91  | ICD9  | Hypertensive renal disease                                                                         |
| Chronic kidney disease | 585.1   | ICD9  | Chronic kidney disease                                                                             |
| Chronic kidney disease | 585.2   | ICD9  | Chronic kidney disease                                                                             |
| Chronic kidney disease | 585.3   | ICD9  | Chronic kidney disease                                                                             |
| Chronic kidney disease | 585.4   | ICD9  | Chronic kidney disease                                                                             |
| Chronic kidney disease | I12.0   | ICD10 | Hypertensive chronic kidney disease                                                                |
| Chronic kidney disease | I12.0   | ICD10 | Hypertensive chronic kidney disease with stage 5 chronic kidney disease or end stage renal disease |

|                                       |        |       |                                                                                         |
|---------------------------------------|--------|-------|-----------------------------------------------------------------------------------------|
| Chronic kidney disease                | I12.9  | ICD10 | Hypertensive chronic kidney disease with stage 1 through stage 4 chronic kidney disease |
| Chronic kidney disease                | N18.1  | ICD10 | Chronic kidney disease                                                                  |
| Chronic kidney disease                | N18.2  | ICD10 | Chronic kidney disease                                                                  |
| Chronic kidney disease                | N18.3  | ICD10 | Chronic kidney disease                                                                  |
| Chronic kidney disease                | N18.4  | ICD10 | Chronic kidney disease                                                                  |
| Chronic obstructive pulmonary disease | 491.2  | ICD9  | Obstructive chronic bronchitis                                                          |
| Chronic obstructive pulmonary disease | 491.2  | ICD9  | Obstructive chronic bronchitis                                                          |
| Chronic obstructive pulmonary disease | 491.21 | ICD9  | Obstructive chronic bronchitis with (acute) exacerbation                                |
| Chronic obstructive pulmonary disease | 491.22 | ICD9  | Obstructive chronic bronchitis with acute bronchitis                                    |
| Chronic obstructive pulmonary disease | 492    | ICD9  | Emphysema                                                                               |
| Chronic obstructive pulmonary disease | 492    | ICD9  | Emphysematous bleb                                                                      |
| Chronic obstructive pulmonary disease | 492.8  | ICD9  | Other emphysema                                                                         |
| Chronic obstructive pulmonary disease | 496    | ICD9  | Chronic airway obstruction                                                              |
| Chronic obstructive pulmonary disease | J44.0  | ICD10 | Other chronic obstructive pulmonary disease                                             |
| Chronic obstructive pulmonary disease | J44.0  | ICD10 | Chronic obstructive pulmonary disease with acute lower respiratory infection            |
| Chronic obstructive pulmonary disease | J44.1  | ICD10 | Chronic obstructive pulmonary disease with (acute) exacerbation                         |
| Chronic obstructive pulmonary disease | J42.0  | ICD10 | Unspecified chronic bronchitis                                                          |
| Chronic obstructive pulmonary disease | J41.0  | ICD10 | Simple and mucopurulent chronic bronchitis                                              |
| Chronic obstructive pulmonary disease | J41.0  | ICD10 | Simple chronic bronchitis                                                               |

|                                       |        |       |                                                                              |
|---------------------------------------|--------|-------|------------------------------------------------------------------------------|
| Chronic obstructive pulmonary disease | J41.1  | ICD10 | Mucopurulent chronic bronchitis                                              |
| Chronic obstructive pulmonary disease | J41.8  | ICD10 | Mixed simple and mucopurulent chronic bronchitis                             |
| Chronic obstructive pulmonary disease | J43.0  | ICD10 | Emphysema                                                                    |
| Chronic obstructive pulmonary disease | J43.0  | ICD10 | Unilateral pulmonary emphysema [MacLeod's syndrome]                          |
| Chronic obstructive pulmonary disease | J43.1  | ICD10 | Panlobular emphysema                                                         |
| Chronic obstructive pulmonary disease | J43.2  | ICD10 | Centrilobular emphysema                                                      |
| Chronic obstructive pulmonary disease | J43.8  | ICD10 | Other emphysema                                                              |
| Chronic obstructive pulmonary disease | J43.9  | ICD10 | Emphysema                                                                    |
| Chronic obstructive pulmonary disease | J44.0  | ICD10 | Other chronic obstructive pulmonary disease                                  |
| Chronic obstructive pulmonary disease | J44.0  | ICD10 | Chronic obstructive pulmonary disease with acute lower respiratory infection |
| Chronic obstructive pulmonary disease | J44.1  | ICD10 | Chronic obstructive pulmonary disease with (acute) exacerbation              |
| Chronic obstructive pulmonary disease | J44.9  | ICD10 | Chronic obstructive pulmonary disease                                        |
| Diabetes mellitus                     | 249    | ICD9  | Secondary diabetes mellitus                                                  |
| Diabetes mellitus                     | 249    | ICD9  | Secondary diabetes mellitus                                                  |
| Diabetes mellitus                     | 249    | ICD9  | Secondary diabetes mellitus                                                  |
| Diabetes mellitus                     | 249.01 | ICD9  | Secondary diabetes mellitus                                                  |
| Diabetes mellitus                     | 249.1  | ICD9  | Secondary diabetes mellitus with ketoacidosis                                |
| Diabetes mellitus                     | 249.1  | ICD9  | Secondary diabetes mellitus with ketoacidosis                                |
| Diabetes mellitus                     | 249.11 | ICD9  | Secondary diabetes mellitus with ketoacidosis                                |
| Diabetes mellitus                     | 249.2  | ICD9  | Secondary diabetes mellitus with hyperosmolarity                             |
| Diabetes mellitus                     | 249.2  | ICD9  | Secondary diabetes mellitus with hyperosmolarity                             |
| Diabetes mellitus                     | 249.21 | ICD9  | Secondary diabetes mellitus with hyperosmolarity                             |

|                   |        |      |                                                                   |
|-------------------|--------|------|-------------------------------------------------------------------|
| Diabetes mellitus | 249.3  | ICD9 | Secondary diabetes mellitus with other coma                       |
| Diabetes mellitus | 249.3  | ICD9 | Secondary diabetes mellitus with other coma                       |
| Diabetes mellitus | 249.31 | ICD9 | Secondary diabetes mellitus with other coma                       |
| Diabetes mellitus | 249.4  | ICD9 | Secondary diabetes mellitus with renal manifestations             |
| Diabetes mellitus | 249.4  | ICD9 | Secondary diabetes mellitus with renal manifestations             |
| Diabetes mellitus | 249.41 | ICD9 | Secondary diabetes mellitus with renal manifestations             |
| Diabetes mellitus | 249.5  | ICD9 | Secondary diabetes mellitus with ophthalmic manifestations        |
| Diabetes mellitus | 249.5  | ICD9 | Secondary diabetes mellitus with ophthalmic manifestations        |
| Diabetes mellitus | 249.51 | ICD9 | Secondary diabetes mellitus with ophthalmic manifestations        |
| Diabetes mellitus | 249.6  | ICD9 | Secondary diabetes mellitus with neurological manifestations      |
| Diabetes mellitus | 249.6  | ICD9 | Secondary diabetes mellitus with neurological manifestations      |
| Diabetes mellitus | 249.61 | ICD9 | Secondary diabetes mellitus with neurological manifestations      |
| Diabetes mellitus | 249.7  | ICD9 | Secondary diabetes mellitus with peripheral circulatory disorders |
| Diabetes mellitus | 249.7  | ICD9 | Secondary diabetes mellitus with peripheral circulatory disorders |
| Diabetes mellitus | 249.71 | ICD9 | Secondary diabetes mellitus with peripheral circulatory disorders |
| Diabetes mellitus | 249.8  | ICD9 | Secondary diabetes mellitus with other specified manifestations   |
| Diabetes mellitus | 249.8  | ICD9 | Secondary diabetes mellitus with other specified manifestations   |
| Diabetes mellitus | 249.81 | ICD9 | Secondary diabetes mellitus with other specified manifestations   |
| Diabetes mellitus | 249.9  | ICD9 | Secondary diabetes mellitus with unspecified complication         |
| Diabetes mellitus | 249.9  | ICD9 | Secondary diabetes mellitus with unspecified complication         |

|                   |        |      |                                                                                                                                 |
|-------------------|--------|------|---------------------------------------------------------------------------------------------------------------------------------|
| Diabetes mellitus | 249.91 | ICD9 | Secondary diabetes mellitus with unspecified complication                                                                       |
| Diabetes mellitus | 250    | ICD9 | Diabetes mellitus                                                                                                               |
| Diabetes mellitus | 250    | ICD9 | Diabetes mellitus without mention of complication                                                                               |
| Diabetes mellitus | 250    | ICD9 | type II diabetes mellitus [non-insulin dependent type] [NIDDM type] [adult-onset type] or unspecified type                      |
| Diabetes mellitus | 250.01 | ICD9 | type I diabetes mellitus [insulin dependent type] [IDDM] [juvenile type]                                                        |
| Diabetes mellitus | 250.02 | ICD9 | type II diabetes mellitus [non-insulin dependent type] [NIDDM type] [adult-onset type] or unspecified type                      |
| Diabetes mellitus | 250.03 | ICD9 | type I diabetes mellitus [juvenile type]                                                                                        |
| Diabetes mellitus | 250.1  | ICD9 | Diabetes with ketoacidosis                                                                                                      |
| Diabetes mellitus | 250.1  | ICD9 | type II diabetes mellitus [non-insulin dependent type] [NIDDM type] [adult-onset type] or unspecified type                      |
| Diabetes mellitus | 250.11 | ICD9 | type I diabetes mellitus [insulin dependent type] [IDDM] [juvenile type]                                                        |
| Diabetes mellitus | 250.12 | ICD9 | type II diabetes mellitus [non-insulin dependent type] [NIDDM type] [adult-onset type] or unspecified type                      |
| Diabetes mellitus | 250.13 | ICD9 | type I diabetes mellitus [juvenile type]                                                                                        |
| Diabetes mellitus | 250.2  | ICD9 | Diabetes mellitus with hyperosmolarity                                                                                          |
| Diabetes mellitus | 250.2  | ICD9 | Diabetes mellitus                                                                                                               |
| Diabetes mellitus | 250.21 | ICD9 | Diabetes mellitus                                                                                                               |
| Diabetes mellitus | 250.22 | ICD9 | Diabetes mellitus type II [non-insulin dependent type] [NIDDM type] [adult-onset type] or unspecified type with hyperosmolarity |
| Diabetes mellitus | 250.23 | ICD9 | Diabetes mellitus                                                                                                               |
| Diabetes mellitus | 250.3  | ICD9 | Diabetes with other coma                                                                                                        |
| Diabetes mellitus | 250.3  | ICD9 | Diabetes mellitus                                                                                                               |
| Diabetes mellitus | 250.31 | ICD9 | Diabetes mellitus                                                                                                               |
| Diabetes mellitus | 250.32 | ICD9 | Diabetes mellitus with other coma                                                                                               |
| Diabetes mellitus | 250.33 | ICD9 | Diabetes mellitus with other coma                                                                                               |
| Diabetes mellitus | 250.4  | ICD9 | Diabetes with renal manifestations                                                                                              |

|                   |        |      |                                                                                                            |
|-------------------|--------|------|------------------------------------------------------------------------------------------------------------|
| Diabetes mellitus | 250.4  | ICD9 | Diabetes mellitus type II [non-insulin dependent type] [NIDDM type] [adult-onset type] or unspecified type |
| Diabetes mellitus | 250.41 | ICD9 | Diabetes mellitus type I [insulin dependent type] [IDDM] [juvenile type]                                   |
| Diabetes mellitus | 250.42 | ICD9 | Diabetes mellitus type II [non-insulin dependent type] [NIDDM type] [adult-onset type] or unspecified type |
| Diabetes mellitus | 250.43 | ICD9 | Diabetes mellitus type I [juvenile type]                                                                   |
| Diabetes mellitus | 250.5  | ICD9 | Diabetes with ophthalmic manifestations                                                                    |
| Diabetes mellitus | 250.5  | ICD9 | Diabetes mellitus type II [non-insulin dependent type] [NIDDM type] [adult-onset type] or unspecified type |
| Diabetes mellitus | 250.51 | ICD9 | Diabetes mellitus type I [insulin dependent type] [IDDM] [juvenile type]                                   |
| Diabetes mellitus | 250.52 | ICD9 | Diabetes mellitus type II [non-insulin dependent type] [NIDDM type] [adult-onset type] or unspecified type |
| Diabetes mellitus | 250.53 | ICD9 | Diabetes mellitus type I [juvenile type]                                                                   |
| Diabetes mellitus | 250.6  | ICD9 | Diabetes with neurological manifestations                                                                  |
| Diabetes mellitus | 250.6  | ICD9 | Diabetes mellitus type II [non-insulin dependent type] [NIDDM type] [adult-onset type] or unspecified type |
| Diabetes mellitus | 250.61 | ICD9 | Diabetes mellitus type I [insulin dependent type] [IDDM] [juvenile type]                                   |
| Diabetes mellitus | 250.62 | ICD9 | Diabetes mellitus type II [non-insulin dependent type] [NIDDM type] [adult-onset type] or unspecified type |
| Diabetes mellitus | 250.63 | ICD9 | Diabetes mellitus type I [juvenile type]                                                                   |
| Diabetes mellitus | 250.7  | ICD9 | Diabetes with peripheral circulatory disorders                                                             |
| Diabetes mellitus | 250.7  | ICD9 | Diabetes mellitus type II [non-insulin dependent type] [NIDDM type] [adult-onset type] or unspecified type |
| Diabetes mellitus | 250.71 | ICD9 | Diabetes mellitus type I [insulin dependent type] [IDDM] [juvenile type]                                   |

|                   |        |       |                                                                                                                               |
|-------------------|--------|-------|-------------------------------------------------------------------------------------------------------------------------------|
| Diabetes mellitus | 250.72 | ICD9  | Diabetes mellitus type II [non-insulin dependent type] [NIDDM type] [adult-onset type] or unspecified type                    |
| Diabetes mellitus | 250.73 | ICD9  | Diabetes mellitus type I [juvenile type]                                                                                      |
| Diabetes mellitus | 250.8  | ICD9  | Diabetes with other specified manifestations                                                                                  |
| Diabetes mellitus | 250.8  | ICD9  | Diabetes mellitus type II [non-insulin dependent type] [NIDDM type] [adult-onset type] or unspecified type                    |
| Diabetes mellitus | 250.81 | ICD9  | Diabetes mellitus type I [insulin dependent type] [IDDM] [juvenile type]                                                      |
| Diabetes mellitus | 250.82 | ICD9  | Diabetes mellitus type II [non-insulin dependent type] [NIDDM type] [adult-onset type] or unspecified type                    |
| Diabetes mellitus | 250.83 | ICD9  | Diabetes mellitus type I [juvenile type]                                                                                      |
| Diabetes mellitus | 250.9  | ICD9  | Diabetes with unspecified complication                                                                                        |
| Diabetes mellitus | 250.9  | ICD9  | Diabetes mellitus type II [non-insulin dependent type] [NIDDM type] [adult-onset type] or unspecified type                    |
| Diabetes mellitus | 250.91 | ICD9  | Diabetes mellitus type I [insulin dependent type] [IDDM] [juvenile type]                                                      |
| Diabetes mellitus | 250.92 | ICD9  | Diabetes mellitus type II [non-insulin dependent type] [NIDDM type] [adult-onset type] or unspecified type                    |
| Diabetes mellitus | 250.93 | ICD9  | Diabetes mellitus type I [insulin dependent type] [IDDM] [juvenile type]                                                      |
| Diabetes mellitus | 357.2  | ICD9  | Polyneuropathy in diabetes                                                                                                    |
| Diabetes mellitus | E08    | ICD10 | Diabetes mellitus due to underlying condition                                                                                 |
| Diabetes mellitus | E08.0  | ICD10 | Diabetes mellitus due to underlying condition with hyperosmolarity                                                            |
| Diabetes mellitus | E08.00 | ICD10 | Diabetes mellitus due to underlying condition with hyperosmolarity without nonketotic hyperglycemic-hyperosmolar coma (NKHHC) |
| Diabetes mellitus | E08.01 | ICD10 | Diabetes mellitus due to underlying condition with hyperosmolarity with coma                                                  |
| Diabetes mellitus | E08.1  | ICD10 | Diabetes mellitus due to underlying condition with ketoacidosis                                                               |

|                   |          |       |                                                                                                                  |
|-------------------|----------|-------|------------------------------------------------------------------------------------------------------------------|
| Diabetes mellitus | E08.10   | ICD10 | Diabetes mellitus due to underlying condition with ketoacidosis without coma                                     |
| Diabetes mellitus | E08.11   | ICD10 | Diabetes mellitus due to underlying condition with ketoacidosis with coma                                        |
| Diabetes mellitus | E08.2    | ICD10 | Diabetes mellitus due to underlying condition with kidney complications                                          |
| Diabetes mellitus | E08.21   | ICD10 | Diabetes mellitus due to underlying condition with diabetic nephropathy                                          |
| Diabetes mellitus | E08.22   | ICD10 | Diabetes mellitus due to underlying condition with diabetic chronic kidney disease                               |
| Diabetes mellitus | E08.29   | ICD10 | Diabetes mellitus due to underlying condition with other diabetic kidney complication                            |
| Diabetes mellitus | E08.3    | ICD10 | Diabetes mellitus due to underlying condition with ophthalmic complications                                      |
| Diabetes mellitus | E08.31   | ICD10 | Diabetes mellitus due to underlying condition with unspecified diabetic retinopathy                              |
| Diabetes mellitus | E08.311  | ICD10 | Diabetes mellitus due to underlying condition with unspecified diabetic retinopathy with macular edema           |
| Diabetes mellitus | E08.319  | ICD10 | Diabetes mellitus due to underlying condition with unspecified diabetic retinopathy without macular edema        |
| Diabetes mellitus | E08.32   | ICD10 | Diabetes mellitus due to underlying condition with mild nonproliferative diabetic retinopathy                    |
| Diabetes mellitus | E08.321  | ICD10 | Diabetes mellitus due to underlying condition with mild nonproliferative diabetic retinopathy with macular edema |
| Diabetes mellitus | E08.3211 | ICD10 | Diabetes with mild nonp rtnop with macular edema                                                                 |
| Diabetes mellitus | E08.3212 | ICD10 | Diabetes with mild nonp rtnop with macular edema                                                                 |
| Diabetes mellitus | E08.3213 | ICD10 | Diabetes with mild nonp rtnop with macular edema                                                                 |



|                   |          |       |                                                                                                                         |
|-------------------|----------|-------|-------------------------------------------------------------------------------------------------------------------------|
| Diabetes mellitus | E08.3219 | ICD10 | Diabetes with mild nonp rtnop with macular edema                                                                        |
| Diabetes mellitus | E08.329  | ICD10 | Diabetes mellitus due to underlying condition with mild nonproliferative diabetic retinopathy without macular edema     |
| Diabetes mellitus | E08.3291 | ICD10 | Diabetes with mild nonp rtnop without macular edema                                                                     |
| Diabetes mellitus | E08.3292 | ICD10 | Diabetes mellitus due to underlying condition with mild nonproliferative diabetic retinopathy without macular edema     |
| Diabetes mellitus | E08.3293 | ICD10 | Diabetes with mild nonp rtnop without macular edema                                                                     |
| Diabetes mellitus | E08.3299 | ICD10 | Diabetes with mild nonp rtnop without macular edema                                                                     |
| Diabetes mellitus | E08.33   | ICD10 | Diabetes mellitus due to underlying condition with moderate nonproliferative diabetic retinopathy                       |
| Diabetes mellitus | E08.331  | ICD10 | Diabetes mellitus due to underlying condition with moderate nonproliferative diabetic retinopathy with macular edema    |
| Diabetes mellitus | E08.3311 | ICD10 | Diabetes with moderate nonp rtnop with macular edema                                                                    |
| Diabetes mellitus | E08.3312 | ICD10 | Diabetes mellitus due to underlying condition with moderate nonproliferative diabetic retinopathy with macular edema    |
| Diabetes mellitus | E08.3313 | ICD10 | Diabetes with moderate nonp rtnop with macular edema                                                                    |
| Diabetes mellitus | E08.3319 | ICD10 | Diabetes with moderate nonp rtnop with macular edema                                                                    |
| Diabetes mellitus | E08.339  | ICD10 | Diabetes mellitus due to underlying condition with moderate nonproliferative diabetic retinopathy without macular edema |

|                   |          |       |                                                                                                                         |
|-------------------|----------|-------|-------------------------------------------------------------------------------------------------------------------------|
| Diabetes mellitus | E08.3391 | ICD10 | Diabetes mellitus due to underlying condition with moderate nonproliferative diabetic retinopathy without macular edema |
| Diabetes mellitus | E08.3392 | ICD10 | Diabetes mellitus due to underlying condition with moderate nonproliferative diabetic retinopathy without macular edema |
| Diabetes mellitus | E08.3393 | ICD10 | Diabetes with moderate nonp rtnop without macular edema                                                                 |
| Diabetes mellitus | E08.3399 | ICD10 | Diabetes mellitus due to underlying condition with moderate nonproliferative diabetic retinopathy without macular edema |
| Diabetes mellitus | E08.34   | ICD10 | Diabetes mellitus due to underlying condition with severe nonproliferative diabetic retinopathy                         |
| Diabetes mellitus | E08.341  | ICD10 | Diabetes mellitus due to underlying condition with severe nonproliferative diabetic retinopathy with macular edema      |
| Diabetes mellitus | E08.3411 | ICD10 | Diabetes with severe nonp rtnop with macular edema                                                                      |
| Diabetes mellitus | E08.3412 | ICD10 | Diabetes with severe nonp rtnop with macular edema                                                                      |
| Diabetes mellitus | E08.3413 | ICD10 | Diabetes with severe nonp rtnop with macular edema                                                                      |
| Diabetes mellitus | E08.3419 | ICD10 | Diabetes with severe nonp rtnop with macular edema                                                                      |
| Diabetes mellitus | E08.349  | ICD10 | Diabetes mellitus due to underlying condition with severe nonproliferative diabetic retinopathy without macular edema   |
| Diabetes mellitus | E08.3491 | ICD10 | Diabetes with severe nonp rtnop without macular edema                                                                   |
| Diabetes mellitus | E08.3492 | ICD10 | Diabetes mellitus due to underlying condition with severe nonproliferative diabetic retinopathy without macular edema   |

|                   |          |       |                                                                                                                                             |
|-------------------|----------|-------|---------------------------------------------------------------------------------------------------------------------------------------------|
| Diabetes mellitus | E08.3493 | ICD10 | Diabetes with severe nonp rtnop without macular edema                                                                                       |
| Diabetes mellitus | E08.3499 | ICD10 | Diabetes with severe nonp rtnop without macular edema                                                                                       |
| Diabetes mellitus | E08.35   | ICD10 | Diabetes mellitus due to underlying condition with proliferative diabetic retinopathy                                                       |
| Diabetes mellitus | E08.351  | ICD10 | Diabetes mellitus due to underlying condition with proliferative diabetic retinopathy with macular edema                                    |
| Diabetes mellitus | E08.3511 | ICD10 | Diabetes mellitus due to underlying condition with proliferative diabetic retinopathy with macular edema                                    |
| Diabetes mellitus | E08.3512 | ICD10 | Diabetes mellitus due to underlying condition with proliferative diabetic retinopathy with macular edema                                    |
| Diabetes mellitus | E08.3513 | ICD10 | Diabetes with prolif diabetic rtnop with macular edema                                                                                      |
| Diabetes mellitus | E08.3519 | ICD10 | Diabetes with prolif diabetic rtnop with macular edema                                                                                      |
| Diabetes mellitus | E08.352  | ICD10 | Diabetes mellitus due to underlying condition with proliferative diabetic retinopathy with traction retinal detachment involving the macula |
| Diabetes mellitus | E08.3521 | ICD10 | Diabetes mellitus due to underlying condition with proliferative diabetic retinopathy with traction retinal detachment involving the macula |
| Diabetes mellitus | E08.3522 | ICD10 | Diabetes mellitus due to underlying condition with proliferative diabetic retinopathy with traction retinal detachment involving the macula |
| Diabetes mellitus | E08.3523 | ICD10 | Diabetes mellitus due to underlying condition with proliferative diabetic retinopathy with traction retinal detachment involving the macula |
| Diabetes mellitus | E08.3529 | ICD10 | Diabetes mellitus due to underlying condition with proliferative diabetic retinopathy with traction retinal detachment involving the macula |

|                   |          |       |                                                                                                                                                                       |
|-------------------|----------|-------|-----------------------------------------------------------------------------------------------------------------------------------------------------------------------|
| Diabetes mellitus | E08.353  | ICD10 | Diabetes mellitus due to underlying condition with proliferative diabetic retinopathy with traction retinal detachment not involving the macula                       |
| Diabetes mellitus | E08.3531 | ICD10 | Diabetes mellitus due to underlying condition with proliferative diabetic retinopathy with traction retinal detachment not involving the macula                       |
| Diabetes mellitus | E08.3532 | ICD10 | Diabetes mellitus due to underlying condition with proliferative diabetic retinopathy with traction retinal detachment not involving the macula                       |
| Diabetes mellitus | E08.3533 | ICD10 | Diabetes mellitus due to underlying condition with proliferative diabetic retinopathy with traction retinal detachment not involving the macula                       |
| Diabetes mellitus | E08.3539 | ICD10 | Diabetes mellitus due to underlying condition with proliferative diabetic retinopathy with traction retinal detachment not involving the macula                       |
| Diabetes mellitus | E08.354  | ICD10 | Diabetes mellitus due to underlying condition with proliferative diabetic retinopathy with combined traction retinal detachment and rhegmatogenous retinal detachment |
| Diabetes mellitus | E08.3541 | ICD10 | Diabetes with proliferative diabetic retinopathy with combined traction retinal detachment and rhegmatogenous retinal detachment                                      |
| Diabetes mellitus | E08.3542 | ICD10 | Diabetes with proliferative diabetic retinopathy with combined traction retinal detachment and rhegmatogenous retinal detachment                                      |
| Diabetes mellitus | E08.3543 | ICD10 | Diabetes with proliferative diabetic retinopathy with combined traction retinal detachment and rhegmatogenous retinal detachment                                      |
| Diabetes mellitus | E08.3549 | ICD10 | Diabetes with proliferative diabetic retinopathy with combined traction retinal detachment and rhegmatogenous retinal detachment                                      |
| Diabetes mellitus | E08.355  | ICD10 | Diabetes mellitus due to underlying condition with stable proliferative diabetic retinopathy                                                                          |

|                   |          |       |                                                                                                             |
|-------------------|----------|-------|-------------------------------------------------------------------------------------------------------------|
| Diabetes mellitus | E08.3551 | ICD10 | Diabetes with stable proliferative diabetic retinopathy                                                     |
| Diabetes mellitus | E08.3552 | ICD10 | Diabetes with stable proliferative diabetic retinopathy                                                     |
| Diabetes mellitus | E08.3553 | ICD10 | Diabetes with stable proliferative diabetic retinopathy                                                     |
| Diabetes mellitus | E08.3559 | ICD10 | Diabetes with stable proliferative diabetic retinopathy                                                     |
| Diabetes mellitus | E08.359  | ICD10 | Diabetes mellitus due to underlying condition with proliferative diabetic retinopathy without macular edema |
| Diabetes mellitus | E08.3591 | ICD10 | Diabetes mellitus due to underlying condition with proliferative diabetic retinopathy without macular edema |
| Diabetes mellitus | E08.3592 | ICD10 | Diabetes mellitus due to underlying condition with proliferative diabetic retinopathy without macular edema |
| Diabetes mellitus | E08.3593 | ICD10 | Diabetes mellitus due to underlying condition with proliferative diabetic retinopathy without macular edema |
| Diabetes mellitus | E08.3599 | ICD10 | Diabetes mellitus due to underlying condition with proliferative diabetic retinopathy without macular edema |
| Diabetes mellitus | E08.36   | ICD10 | Diabetes mellitus due to underlying condition with diabetic cataract                                        |
| Diabetes mellitus | E08.37   | ICD10 | Diabetes mellitus due to underlying condition with diabetic macular edema                                   |
| Diabetes mellitus | E08.37X1 | ICD10 | Diabetes mellitus due to underlying condition with diabetic macular edema                                   |
| Diabetes mellitus | E08.37X2 | ICD10 | Diabetes mellitus due to underlying condition with diabetic macular edema                                   |
| Diabetes mellitus | E08.37X3 | ICD10 | Diabetes with diabetic macular edema                                                                        |
| Diabetes mellitus | E08.37X9 | ICD10 | Diabetes mellitus due to underlying condition with diabetic macular edema                                   |
| Diabetes mellitus | E08.39   | ICD10 | Diabetes mellitus due to underlying condition with other diabetic ophthalmic complication                   |
| Diabetes mellitus | E08.4    | ICD10 | Diabetes mellitus due to underlying condition with neurological complications                               |

|                   |         |       |                                                                                                    |
|-------------------|---------|-------|----------------------------------------------------------------------------------------------------|
| Diabetes mellitus | E08.40  | ICD10 | Diabetes mellitus due to underlying condition with diabetic neuropathy                             |
| Diabetes mellitus | E08.41  | ICD10 | Diabetes mellitus due to underlying condition with diabetic mononeuropathy                         |
| Diabetes mellitus | E08.42  | ICD10 | Diabetes mellitus due to underlying condition with diabetic polyneuropathy                         |
| Diabetes mellitus | E08.43  | ICD10 | Diabetes mellitus due to underlying condition with diabetic autonomic (poly)neuropathy             |
| Diabetes mellitus | E08.44  | ICD10 | Diabetes mellitus due to underlying condition with diabetic amyotrophy                             |
| Diabetes mellitus | E08.49  | ICD10 | Diabetes mellitus due to underlying condition with other diabetic neurological complication        |
| Diabetes mellitus | E08.5   | ICD10 | Diabetes mellitus due to underlying condition with circulatory complications                       |
| Diabetes mellitus | E08.51  | ICD10 | Diabetes mellitus due to underlying condition with diabetic peripheral angiopathy without gangrene |
| Diabetes mellitus | E08.52  | ICD10 | Diabetes mellitus due to underlying condition with diabetic peripheral angiopathy with gangrene    |
| Diabetes mellitus | E08.59  | ICD10 | Diabetes mellitus due to underlying condition with other circulatory complications                 |
| Diabetes mellitus | E08.6   | ICD10 | Diabetes mellitus due to underlying condition with other specified complications                   |
| Diabetes mellitus | E08.61  | ICD10 | Diabetes mellitus due to underlying condition with diabetic arthropathy                            |
| Diabetes mellitus | E08.610 | ICD10 | Diabetes mellitus due to underlying condition with diabetic neuropathic arthropathy                |
| Diabetes mellitus | E08.618 | ICD10 | Diabetes mellitus due to underlying condition with other diabetic arthropathy                      |
| Diabetes mellitus | E08.62  | ICD10 | Diabetes mellitus due to underlying condition with skin complications                              |
| Diabetes mellitus | E08.620 | ICD10 | Diabetes mellitus due to underlying condition with diabetic necrobiosis lipoidica                  |

|                   |         |       |                                                                                                                            |
|-------------------|---------|-------|----------------------------------------------------------------------------------------------------------------------------|
| Diabetes mellitus | E08.621 | ICD10 | Diabetes mellitus due to underlying condition with foot ulcer                                                              |
| Diabetes mellitus | E08.622 | ICD10 | Diabetes mellitus due to underlying condition with other skin ulcer                                                        |
| Diabetes mellitus | E08.628 | ICD10 | Diabetes mellitus due to underlying condition with other skin complications                                                |
| Diabetes mellitus | E08.63  | ICD10 | Diabetes mellitus due to underlying condition with oral complications                                                      |
| Diabetes mellitus | E08.630 | ICD10 | Diabetes mellitus due to underlying condition with periodontal disease                                                     |
| Diabetes mellitus | E08.638 | ICD10 | Diabetes mellitus due to underlying condition with other oral complications                                                |
| Diabetes mellitus | E08.64  | ICD10 | Diabetes mellitus due to underlying condition with hypoglycemia                                                            |
| Diabetes mellitus | E08.641 | ICD10 | Diabetes mellitus due to underlying condition with hypoglycemia with coma                                                  |
| Diabetes mellitus | E08.649 | ICD10 | Diabetes mellitus due to underlying condition with hypoglycemia without coma                                               |
| Diabetes mellitus | E08.65  | ICD10 | Diabetes mellitus due to underlying condition with hyperglycemia                                                           |
| Diabetes mellitus | E08.69  | ICD10 | Diabetes mellitus due to underlying condition with other specified complication                                            |
| Diabetes mellitus | E08.8   | ICD10 | Diabetes mellitus due to underlying condition with unspecified complications                                               |
| Diabetes mellitus | E08.9   | ICD10 | Diabetes mellitus due to underlying condition without complications                                                        |
| Diabetes mellitus | E09     | ICD10 | Drug or chemical induced diabetes mellitus                                                                                 |
| Diabetes mellitus | E09.0   | ICD10 | Drug or chemical induced diabetes mellitus with hyperosmolarity                                                            |
| Diabetes mellitus | E09.00  | ICD10 | Drug or chemical induced diabetes mellitus with hyperosmolarity without nonketotic hyperglycemic-hyperosmolar coma (NKHHC) |
| Diabetes mellitus | E09.01  | ICD10 | Drug or chemical induced diabetes mellitus with hyperosmolarity with coma                                                  |
| Diabetes mellitus | E09.1   | ICD10 | Drug or chemical induced diabetes mellitus with ketoacidosis                                                               |

|                   |          |       |                                                                                                               |
|-------------------|----------|-------|---------------------------------------------------------------------------------------------------------------|
| Diabetes mellitus | E09.10   | ICD10 | Drug or chemical induced diabetes mellitus with ketoacidosis without coma                                     |
| Diabetes mellitus | E09.11   | ICD10 | Drug or chemical induced diabetes mellitus with ketoacidosis with coma                                        |
| Diabetes mellitus | E09.2    | ICD10 | Drug or chemical induced diabetes mellitus with kidney complications                                          |
| Diabetes mellitus | E09.21   | ICD10 | Drug or chemical induced diabetes mellitus with diabetic nephropathy                                          |
| Diabetes mellitus | E09.22   | ICD10 | Drug or chemical induced diabetes mellitus with diabetic chronic kidney disease                               |
| Diabetes mellitus | E09.29   | ICD10 | Drug or chemical induced diabetes mellitus with other diabetic kidney complication                            |
| Diabetes mellitus | E09.3    | ICD10 | Drug or chemical induced diabetes mellitus with ophthalmic complications                                      |
| Diabetes mellitus | E09.31   | ICD10 | Drug or chemical induced diabetes mellitus with unspecified diabetic retinopathy                              |
| Diabetes mellitus | E09.311  | ICD10 | Drug or chemical induced diabetes mellitus with unspecified diabetic retinopathy with macular edema           |
| Diabetes mellitus | E09.319  | ICD10 | Drug or chemical induced diabetes mellitus with unspecified diabetic retinopathy without macular edema        |
| Diabetes mellitus | E09.32   | ICD10 | Drug or chemical induced diabetes mellitus with mild nonproliferative diabetic retinopathy                    |
| Diabetes mellitus | E09.321  | ICD10 | Drug or chemical induced diabetes mellitus with mild nonproliferative diabetic retinopathy with macular edema |
| Diabetes mellitus | E09.3211 | ICD10 | Drug or chemical induced diabetes mellitus with mild nonproliferative diabetic retinopathy with macular edema |
| Diabetes mellitus | E09.3212 | ICD10 | Drug/chem diab with mild nonp rtnop with mclr edema                                                           |
| Diabetes mellitus | E09.3213 | ICD10 | Drug/chem diab with mild nonp rtnop with macular edema                                                        |



|    |                   |          |                                                                                                                            |
|----|-------------------|----------|----------------------------------------------------------------------------------------------------------------------------|
| 1  |                   |          |                                                                                                                            |
| 2  |                   |          |                                                                                                                            |
| 3  |                   |          |                                                                                                                            |
| 4  | Diabetes mellitus | E09.3219 | ICD10 Drug/chem diab with mild nonp rtnop with macular edema                                                               |
| 5  |                   |          |                                                                                                                            |
| 6  | Diabetes mellitus | E09.329  | ICD10 Drug or chemical induced diabetes mellitus with mild nonproliferative diabetic retinopathy without macular edema     |
| 7  |                   |          |                                                                                                                            |
| 8  |                   |          |                                                                                                                            |
| 9  |                   |          |                                                                                                                            |
| 10 |                   |          |                                                                                                                            |
| 11 | Diabetes mellitus | E09.3291 | ICD10 Drug/chem diab with mild nonp rtnop w/o mclr edema                                                                   |
| 12 |                   |          |                                                                                                                            |
| 13 | Diabetes mellitus | E09.3292 | ICD10 Drug/chem diab with mild nonp rtnop w/o mclr edema                                                                   |
| 14 |                   |          |                                                                                                                            |
| 15 | Diabetes mellitus | E09.3293 | ICD10 Drug/chem diab with mild nonp rtnop without mclr edema                                                               |
| 16 |                   |          |                                                                                                                            |
| 17 | Diabetes mellitus | E09.3299 | ICD10 Drug/chem diab with mild nonp rtnop without mclr edema                                                               |
| 18 |                   |          |                                                                                                                            |
| 19 | Diabetes mellitus | E09.33   | ICD10 Drug or chemical induced diabetes mellitus with moderate nonproliferative diabetic retinopathy                       |
| 20 |                   |          |                                                                                                                            |
| 21 | Diabetes mellitus | E09.331  | ICD10 Drug or chemical induced diabetes mellitus with moderate nonproliferative diabetic retinopathy with macular edema    |
| 22 |                   |          |                                                                                                                            |
| 23 | Diabetes mellitus | E09.3311 | ICD10 Drug/chem diab with mod nonp rtnop with macular edema                                                                |
| 24 |                   |          |                                                                                                                            |
| 25 | Diabetes mellitus | E09.3312 | ICD10 Drug/chem diab with mod nonp rtnop with macular edema                                                                |
| 26 |                   |          |                                                                                                                            |
| 27 | Diabetes mellitus | E09.3313 | ICD10 Drug/chem diab with mod nonp rtnop with macular edema                                                                |
| 28 |                   |          |                                                                                                                            |
| 29 | Diabetes mellitus | E09.3319 | ICD10 Drug/chem diab with mod nonp rtnop with macular edema                                                                |
| 30 |                   |          |                                                                                                                            |
| 31 | Diabetes mellitus | E09.339  | ICD10 Drug or chemical induced diabetes mellitus with moderate nonproliferative diabetic retinopathy without macular edema |
| 32 |                   |          |                                                                                                                            |
| 33 | Diabetes mellitus | E09.3391 | ICD10 Drug/chem diab with mod nonp rtnop without mclr edema                                                                |
| 34 |                   |          |                                                                                                                            |
| 35 | Diabetes mellitus | E09.3392 | ICD10 Drug/chem diab with mod nonp rtnop without mclr edema                                                                |
| 36 |                   |          |                                                                                                                            |
| 37 | Diabetes mellitus | E09.3393 | ICD10 Drug/chem diab with mod nonp rtnop without macular edema                                                             |
| 38 |                   |          |                                                                                                                            |
| 39 |                   |          |                                                                                                                            |
| 40 |                   |          |                                                                                                                            |
| 41 |                   |          |                                                                                                                            |
| 42 |                   |          |                                                                                                                            |
| 43 |                   |          |                                                                                                                            |
| 44 |                   |          |                                                                                                                            |
| 45 |                   |          |                                                                                                                            |
| 46 |                   |          |                                                                                                                            |
| 47 |                   |          |                                                                                                                            |
| 48 |                   |          |                                                                                                                            |
| 49 |                   |          |                                                                                                                            |
| 50 |                   |          |                                                                                                                            |
| 51 |                   |          |                                                                                                                            |
| 52 |                   |          |                                                                                                                            |
| 53 |                   |          |                                                                                                                            |
| 54 |                   |          |                                                                                                                            |
| 55 |                   |          |                                                                                                                            |
| 56 |                   |          |                                                                                                                            |
| 57 |                   |          |                                                                                                                            |
| 58 |                   |          |                                                                                                                            |
| 59 |                   |          |                                                                                                                            |
| 60 |                   |          |                                                                                                                            |

|    |                   |          |                                                                                                                          |
|----|-------------------|----------|--------------------------------------------------------------------------------------------------------------------------|
| 1  |                   |          |                                                                                                                          |
| 2  |                   |          |                                                                                                                          |
| 3  |                   |          |                                                                                                                          |
| 4  | Diabetes mellitus | E09.3399 | ICD10 Drug/chem diab with mod nonp rtnop without mclr edema                                                              |
| 5  |                   |          |                                                                                                                          |
| 6  | Diabetes mellitus | E09.34   | ICD10 Drug or chemical induced diabetes mellitus with severe nonproliferative diabetic retinopathy                       |
| 7  |                   |          |                                                                                                                          |
| 8  |                   |          |                                                                                                                          |
| 9  |                   |          |                                                                                                                          |
| 10 |                   |          |                                                                                                                          |
| 11 | Diabetes mellitus | E09.341  | ICD10 Drug or chemical induced diabetes mellitus with severe nonproliferative diabetic retinopathy with macular edema    |
| 12 |                   |          |                                                                                                                          |
| 13 |                   |          |                                                                                                                          |
| 14 |                   |          |                                                                                                                          |
| 15 | Diabetes mellitus | E09.3411 | ICD10 Drug/chem diab with severe nonp rtnop with mclr edema                                                              |
| 16 |                   |          |                                                                                                                          |
| 17 |                   |          |                                                                                                                          |
| 18 | Diabetes mellitus | E09.3412 | ICD10 Drug/chem diab with severe nonp rtnop with mclr edema                                                              |
| 19 |                   |          |                                                                                                                          |
| 20 |                   |          |                                                                                                                          |
| 21 | Diabetes mellitus | E09.3413 | ICD10 Drug/chem diab with severe nonp rtnop with macular edema                                                           |
| 22 |                   |          |                                                                                                                          |
| 23 |                   |          |                                                                                                                          |
| 24 | Diabetes mellitus | E09.3419 | ICD10 Drug/chem diab with severe nonp rtnop with mclr edema                                                              |
| 25 |                   |          |                                                                                                                          |
| 26 |                   |          |                                                                                                                          |
| 27 | Diabetes mellitus | E09.349  | ICD10 Drug or chemical induced diabetes mellitus with severe nonproliferative diabetic retinopathy without macular edema |
| 28 |                   |          |                                                                                                                          |
| 29 |                   |          |                                                                                                                          |
| 30 |                   |          |                                                                                                                          |
| 31 | Diabetes mellitus | E09.3491 | ICD10 Drug/chem diab with severe nonp rtnop w/o mclr edema                                                               |
| 32 |                   |          |                                                                                                                          |
| 33 |                   |          |                                                                                                                          |
| 34 | Diabetes mellitus | E09.3492 | ICD10 Drug/chem diab with severe nonp rtnop w/o mclr edema                                                               |
| 35 |                   |          |                                                                                                                          |
| 36 |                   |          |                                                                                                                          |
| 37 | Diabetes mellitus | E09.3493 | ICD10 Drug/chem diab with severe nonp rtnop without mclr edema                                                           |
| 38 |                   |          |                                                                                                                          |
| 39 |                   |          |                                                                                                                          |
| 40 | Diabetes mellitus | E09.3499 | ICD10 Drug/chem diab with severe nonp rtnop w/o mclr edema                                                               |
| 41 |                   |          |                                                                                                                          |
| 42 |                   |          |                                                                                                                          |
| 43 | Diabetes mellitus | E09.35   | ICD10 Drug or chemical induced diabetes mellitus with proliferative diabetic retinopathy                                 |
| 44 |                   |          |                                                                                                                          |
| 45 |                   |          |                                                                                                                          |
| 46 | Diabetes mellitus | E09.351  | ICD10 Drug or chemical induced diabetes mellitus with proliferative diabetic retinopathy with macular edema              |
| 47 |                   |          |                                                                                                                          |
| 48 |                   |          |                                                                                                                          |
| 49 |                   |          |                                                                                                                          |
| 50 | Diabetes mellitus | E09.3511 | ICD10 Drug/chem diab with prolif diab rtnop with mclr edema                                                              |
| 51 |                   |          |                                                                                                                          |
| 52 |                   |          |                                                                                                                          |
| 53 | Diabetes mellitus | E09.3512 | ICD10 Drug/chem diab with prolif diab rtnop with mclr edema                                                              |
| 54 |                   |          |                                                                                                                          |
| 55 |                   |          |                                                                                                                          |
| 56 |                   |          |                                                                                                                          |
| 57 |                   |          |                                                                                                                          |
| 58 |                   |          |                                                                                                                          |
| 59 |                   |          |                                                                                                                          |
| 60 |                   |          |                                                                                                                          |

|                   |          |       |                                                                                                                                                                    |
|-------------------|----------|-------|--------------------------------------------------------------------------------------------------------------------------------------------------------------------|
| Diabetes mellitus | E09.3513 | ICD10 | Drug/chem diab with proliferative diabetic retinopathy with macular edema                                                                                          |
| Diabetes mellitus | E09.3519 | ICD10 | Drug/chem diab with proliferative diabetic retinopathy with macular edema                                                                                          |
| Diabetes mellitus | E09.352  | ICD10 | Drug or chemical induced diabetes mellitus with proliferative diabetic retinopathy with traction retinal detachment involving the macula                           |
| Diabetes mellitus | E09.3521 | ICD10 | Drug/chem diab w proliferative diabetic retinopathy w traction detachment macula                                                                                   |
| Diabetes mellitus | E09.3522 | ICD10 | Drug/chem diab w proliferative diabetic retinopathy w traction detachment macula                                                                                   |
| Diabetes mellitus | E09.3523 | ICD10 | Drug/chem diab w proliferative diabetic retinopathy w traction detachment macula                                                                                   |
| Diabetes mellitus | E09.3529 | ICD10 | Drug/chem diab w proliferative diabetic retinopathy w traction detachment macula                                                                                   |
| Diabetes mellitus | E09.353  | ICD10 | Drug or chemical induced diabetes mellitus with proliferative diabetic retinopathy with traction retinal detachment not involving the macula                       |
| Diabetes mellitus | E09.3531 | ICD10 | Drug/chem diab w proliferative diabetic retinopathy w traction detachment non-macular                                                                              |
| Diabetes mellitus | E09.3532 | ICD10 | Drug/chem diab w proliferative diabetic retinopathy w traction detachment non-macular                                                                              |
| Diabetes mellitus | E09.3533 | ICD10 | Drug/chem diab w proliferative diabetic retinopathy w traction detachment non-macular                                                                              |
| Diabetes mellitus | E09.3539 | ICD10 | Drug/chem diab w proliferative diabetic retinopathy w traction detachment non-macular                                                                              |
| Diabetes mellitus | E09.354  | ICD10 | Drug or chemical induced diabetes mellitus with proliferative diabetic retinopathy with combined traction retinal detachment and rhegmatogenous retinal detachment |
| Diabetes mellitus | E09.3541 | ICD10 | Drug/chem diab w proliferative diabetic retinopathy with combined detachment                                                                                       |
| Diabetes mellitus | E09.3542 | ICD10 | Drug/chem diab w proliferative diabetic retinopathy with combined detachment                                                                                       |
| Diabetes mellitus | E09.3543 | ICD10 | Drug/chem diab with proliferative diabetic retinopathy with combined detachment                                                                                    |

|                   |          |       |                                                                                                          |
|-------------------|----------|-------|----------------------------------------------------------------------------------------------------------|
| Diabetes mellitus | E09.3549 | ICD10 | Drug/chem diab with prolif diab rtnop with comb detach                                                   |
| Diabetes mellitus | E09.355  | ICD10 | Drug or chemical induced diabetes mellitus with stable proliferative diabetic retinopathy                |
| Diabetes mellitus | E09.3551 | ICD10 | Drug/chem diabetes with stable prolif diabetic rtnop                                                     |
| Diabetes mellitus | E09.3552 | ICD10 | Drug/chem diab with stable prolif diabetic rtnop                                                         |
| Diabetes mellitus | E09.3553 | ICD10 | Drug/chem diabetes with stable prolif diabetic rtnop                                                     |
| Diabetes mellitus | E09.3559 | ICD10 | Drug/chem diabetes with stable prolif diabetic rtnop                                                     |
| Diabetes mellitus | E09.359  | ICD10 | Drug or chemical induced diabetes mellitus with proliferative diabetic retinopathy without macular edema |
| Diabetes mellitus | E09.3591 | ICD10 | Drug/chem diab with prolif diab rtnop w/o mclr edema                                                     |
| Diabetes mellitus | E09.3592 | ICD10 | Drug/chem diab with prolif diab rtnop w/o mclr edema                                                     |
| Diabetes mellitus | E09.3593 | ICD10 | Drug/chem diab with prolif diab rtnop without mclr edema                                                 |
| Diabetes mellitus | E09.3599 | ICD10 | Drug/chem diab with prolif diab rtnop w/o mclr edema                                                     |
| Diabetes mellitus | E09.36   | ICD10 | Drug or chemical induced diabetes mellitus with diabetic cataract                                        |
| Diabetes mellitus | E09.37   | ICD10 | Drug or chemical induced diabetes mellitus with diabetic macular edema                                   |
| Diabetes mellitus | E09.37X1 | ICD10 | Drug/chem diab w diab mclr edma                                                                          |
| Diabetes mellitus | E09.37X2 | ICD10 | Drug/chem diab w diab mclr edma                                                                          |
| Diabetes mellitus | E09.37X3 | ICD10 | Drug/chem diab with diab mclr edema                                                                      |
| Diabetes mellitus | E09.37X9 | ICD10 | Drug/chem diab with diab mclr edma                                                                       |
| Diabetes mellitus | E09.39   | ICD10 | Drug/chem diabetes w oth diabetic ophthalmic complication                                                |
| Diabetes mellitus | E09.4    | ICD10 | Drug or chemical induced diabetes mellitus with neurological complications                               |
| Diabetes mellitus | E09.40   | ICD10 | Drug or chemical induced diabetes mellitus with neurological complications with diabetic neuropathy      |

|                   |         |       |                                                                                                                     |
|-------------------|---------|-------|---------------------------------------------------------------------------------------------------------------------|
| Diabetes mellitus | E09.41  | ICD10 | Drug/chem diabetes w neuro comp w diabetic mononeuropathy                                                           |
| Diabetes mellitus | E09.42  | ICD10 | Drug or chemical induced diabetes mellitus with neurological complications with diabetic polyneuropathy             |
| Diabetes mellitus | E09.43  | ICD10 | Drug or chemical induced diabetes mellitus with neurological complications with diabetic autonomic (poly)neuropathy |
| Diabetes mellitus | E09.44  | ICD10 | Drug/chem diabetes w neurological comp w diabetic amyotrophy                                                        |
| Diabetes mellitus | E09.49  | ICD10 | Drug/chem diabetes w neuro comp w oth diabetic neuro comp                                                           |
| Diabetes mellitus | E09.5   | ICD10 | Drug or chemical induced diabetes mellitus with circulatory complications                                           |
| Diabetes mellitus | E09.51  | ICD10 | Drug or chemical induced diabetes mellitus with diabetic peripheral angiopathy without gangrene                     |
| Diabetes mellitus | E09.52  | ICD10 | Drug/chem diabetes w diabetic prph angiopath w gangrene                                                             |
| Diabetes mellitus | E09.59  | ICD10 | Drug/chem diabetes mellitus w oth circulatory complications                                                         |
| Diabetes mellitus | E09.6   | ICD10 | Drug or chemical induced diabetes mellitus with other specified complications                                       |
| Diabetes mellitus | E09.61  | ICD10 | Drug or chemical induced diabetes mellitus with diabetic arthropathy                                                |
| Diabetes mellitus | E09.610 | ICD10 | Drug/chem diabetes w diabetic neuropathic arthropathy                                                               |
| Diabetes mellitus | E09.618 | ICD10 | Drug/chem diabetes mellitus w oth diabetic arthropathy                                                              |
| Diabetes mellitus | E09.62  | ICD10 | Drug or chemical induced diabetes mellitus with skin complications                                                  |
| Diabetes mellitus | E09.620 | ICD10 | Drug/chem diabetes mellitus w diabetic dermatitis                                                                   |
| Diabetes mellitus | E09.621 | ICD10 | Drug or chemical induced diabetes mellitus with foot ulcer                                                          |
| Diabetes mellitus | E09.622 | ICD10 | Drug or chemical induced diabetes mellitus with other skin ulcer                                                    |

|                   |         |       |                                                                                                                   |
|-------------------|---------|-------|-------------------------------------------------------------------------------------------------------------------|
| Diabetes mellitus | E09.628 | ICD10 | Drug/chem diabetes mellitus w oth skin complications                                                              |
| Diabetes mellitus | E09.63  | ICD10 | Drug or chemical induced diabetes mellitus with oral complications                                                |
| Diabetes mellitus | E09.630 | ICD10 | Drug/chem diabetes mellitus w periodontal disease                                                                 |
| Diabetes mellitus | E09.638 | ICD10 | Drug/chem diabetes mellitus w oth oral complications                                                              |
| Diabetes mellitus | E09.64  | ICD10 | Drug or chemical induced diabetes mellitus with hypoglycemia                                                      |
| Diabetes mellitus | E09.641 | ICD10 | Drug/chem diabetes mellitus w hypoglycemia w coma                                                                 |
| Diabetes mellitus | E09.649 | ICD10 | Drug or chemical induced diabetes mellitus with hypoglycemia without coma                                         |
| Diabetes mellitus | E09.65  | ICD10 | Drug or chemical induced diabetes mellitus with hyperglycemia                                                     |
| Diabetes mellitus | E09.69  | ICD10 | Drug or chemical induced diabetes mellitus with other specified complication                                      |
| Diabetes mellitus | E09.8   | ICD10 | Drug or chemical induced diabetes mellitus with unspecified complications                                         |
| Diabetes mellitus | E09.9   | ICD10 | Drug or chemical induced diabetes mellitus without complications                                                  |
| Diabetes mellitus | E13.0   | ICD10 | Other specified diabetes mellitus                                                                                 |
| Diabetes mellitus | E13.0   | ICD10 | Other specified diabetes mellitus with hyperosmolarity                                                            |
| Diabetes mellitus | E13.00  | ICD10 | Other specified diabetes mellitus with hyperosmolarity without nonketotic hyperglycemic-hyperosmolar coma (NKHHC) |
| Diabetes mellitus | E13.01  | ICD10 | Other specified diabetes mellitus with hyperosmolarity with coma                                                  |
| Diabetes mellitus | E13.1   | ICD10 | Other specified diabetes mellitus with ketoacidosis                                                               |
| Diabetes mellitus | E13.10  | ICD10 | Other specified diabetes mellitus with ketoacidosis without coma                                                  |
| Diabetes mellitus | E13.11  | ICD10 | Other specified diabetes mellitus with ketoacidosis with coma                                                     |

|                   |          |       |                                                                                 |
|-------------------|----------|-------|---------------------------------------------------------------------------------|
| Diabetes mellitus | E13.2    | ICD10 | Other specified diabetes mellitus with kidney complications                     |
| Diabetes mellitus | E13.21   | ICD10 | Other specified diabetes mellitus with diabetic nephropathy                     |
| Diabetes mellitus | E13.22   | ICD10 | Other specified diabetes mellitus with diabetic chronic kidney disease          |
| Diabetes mellitus | E13.29   | ICD10 | Other specified diabetes mellitus with other diabetic kidney complication       |
| Diabetes mellitus | E13.3    | ICD10 | Other specified diabetes mellitus with ophthalmic complications                 |
| Diabetes mellitus | E13.36   | ICD10 | Other specified diabetes mellitus with diabetic cataract                        |
| Diabetes mellitus | E13.37   | ICD10 | Other specified diabetes mellitus with diabetic macular edema                   |
| Diabetes mellitus | E13.37X1 | ICD10 | Other specified diabetes mellitus with diabetic macular edema                   |
| Diabetes mellitus | E13.37X2 | ICD10 | Other specified diabetes mellitus with diabetic macular edema                   |
| Diabetes mellitus | E13.37X3 | ICD10 | Other specified diabetes mellitus with diabetic macular edema                   |
| Diabetes mellitus | E13.37X9 | ICD10 | Other specified diabetes mellitus with diabetic macular edema                   |
| Diabetes mellitus | E13.39   | ICD10 | Other specified diabetes mellitus with other diabetic ophthalmic complication   |
| Diabetes mellitus | E13.4    | ICD10 | Other specified diabetes mellitus with neurological complications               |
| Diabetes mellitus | E13.40   | ICD10 | Other specified diabetes mellitus with diabetic neuropathy                      |
| Diabetes mellitus | E13.41   | ICD10 | Other specified diabetes mellitus with diabetic mononeuropathy                  |
| Diabetes mellitus | E13.42   | ICD10 | Other specified diabetes mellitus with diabetic polyneuropathy                  |
| Diabetes mellitus | E13.43   | ICD10 | Other specified diabetes mellitus with diabetic autonomic (poly)neuropathy      |
| Diabetes mellitus | E13.44   | ICD10 | Other specified diabetes mellitus with diabetic amyotrophy                      |
| Diabetes mellitus | E13.49   | ICD10 | Other specified diabetes mellitus with other diabetic neurological complication |
| Diabetes mellitus | E13.5    | ICD10 | Other specified diabetes mellitus with circulatory complications                |

|    |                   |         |       |                                        |
|----|-------------------|---------|-------|----------------------------------------|
| 1  |                   |         |       |                                        |
| 2  |                   |         |       |                                        |
| 3  |                   |         |       |                                        |
| 4  |                   |         |       | Other specified diabetes mellitus with |
| 5  |                   |         |       | diabetic peripheral angiopathy without |
| 6  | Diabetes mellitus | E13.51  | ICD10 | gangrene                               |
| 7  |                   |         |       | Other specified diabetes mellitus with |
| 8  |                   |         |       | diabetic peripheral angiopathy with    |
| 9  |                   |         |       | gangrene                               |
| 10 | Diabetes mellitus | E13.52  | ICD10 |                                        |
| 11 |                   |         |       | Other specified diabetes mellitus with |
| 12 |                   |         |       | other circulatory complications        |
| 13 | Diabetes mellitus | E13.59  | ICD10 |                                        |
| 14 |                   |         |       | Other specified diabetes mellitus with |
| 15 |                   |         |       | other specified complications          |
| 16 | Diabetes mellitus | E13.6   | ICD10 |                                        |
| 17 |                   |         |       | Other specified diabetes mellitus with |
| 18 |                   |         |       | diabetic arthropathy                   |
| 19 | Diabetes mellitus | E13.61  | ICD10 |                                        |
| 20 |                   |         |       | Other specified diabetes mellitus with |
| 21 |                   |         |       | diabetic neuropathic arthropathy       |
| 22 | Diabetes mellitus | E13.610 | ICD10 |                                        |
| 23 |                   |         |       | Other specified diabetes mellitus with |
| 24 |                   |         |       | other diabetic arthropathy             |
| 25 | Diabetes mellitus | E13.618 | ICD10 |                                        |
| 26 |                   |         |       | Other specified diabetes mellitus with |
| 27 |                   |         |       | skin complications                     |
| 28 | Diabetes mellitus | E13.62  | ICD10 |                                        |
| 29 |                   |         |       | Other specified diabetes mellitus with |
| 30 |                   |         |       | diabetic necrobiosis lipoidica         |
| 31 | Diabetes mellitus | E13.620 | ICD10 |                                        |
| 32 |                   |         |       | Other specified diabetes mellitus with |
| 33 |                   |         |       | foot ulcer                             |
| 34 | Diabetes mellitus | E13.621 | ICD10 |                                        |
| 35 |                   |         |       | Other specified diabetes mellitus with |
| 36 |                   |         |       | other skin ulcer                       |
| 37 | Diabetes mellitus | E13.622 | ICD10 |                                        |
| 38 |                   |         |       | Other specified diabetes mellitus with |
| 39 |                   |         |       | other skin complications               |
| 40 | Diabetes mellitus | E13.628 | ICD10 |                                        |
| 41 |                   |         |       | Other specified diabetes mellitus with |
| 42 |                   |         |       | oral complications                     |
| 43 | Diabetes mellitus | E13.63  | ICD10 |                                        |
| 44 |                   |         |       | Other specified diabetes mellitus with |
| 45 |                   |         |       | periodontal disease                    |
| 46 | Diabetes mellitus | E13.630 | ICD10 |                                        |
| 47 |                   |         |       | Other specified diabetes mellitus with |
| 48 |                   |         |       | other oral complications               |
| 49 | Diabetes mellitus | E13.638 | ICD10 |                                        |
| 50 |                   |         |       | Other specified diabetes mellitus with |
| 51 |                   |         |       | hypoglycemia                           |
| 52 | Diabetes mellitus | E13.64  | ICD10 |                                        |
| 53 |                   |         |       | Other specified diabetes mellitus with |
| 54 |                   |         |       | hypoglycemia with coma                 |
| 55 | Diabetes mellitus | E13.641 | ICD10 |                                        |
| 56 |                   |         |       | Other specified diabetes mellitus with |
| 57 |                   |         |       | hypoglycemia without coma              |
| 58 | Diabetes mellitus | E13.649 | ICD10 |                                        |
| 59 |                   |         |       | Other specified diabetes mellitus with |
| 60 |                   |         |       | hyperglycemia                          |
|    | Diabetes mellitus | E13.65  | ICD10 |                                        |



|                   |        |       |                                                                     |
|-------------------|--------|-------|---------------------------------------------------------------------|
| Diabetes mellitus | E13.69 | ICD10 | Other specified diabetes mellitus with other specified complication |
| Diabetes mellitus | E13.8  | ICD10 | Other specified diabetes mellitus with unspecified complications    |
| Diabetes mellitus | E13.9  | ICD10 | Other specified diabetes mellitus without complications             |
| Heart failure     | 428    | ICD9  | Heart failure                                                       |
| Heart failure     | 428    | ICD9  | Congestive heart failure (CHF) NOS                                  |
| Heart failure     | 428    | ICD9  | Congestive heart failure (CHF) NOS **                               |
| Heart failure     | 428.1  | ICD9  | Left heart failure                                                  |
| Heart failure     | 428.2  | ICD9  | Systolic heart failure                                              |
| Heart failure     | 428.2  | ICD9  | Systolic heart failure                                              |
| Heart failure     | 428.21 | ICD9  | Systolic heart failure                                              |
| Heart failure     | 428.22 | ICD9  | Systolic heart failure                                              |
| Heart failure     | 428.23 | ICD9  | Systolic heart failure                                              |
| Heart failure     | 428.3  | ICD9  | Diastolic heart failure                                             |
| Heart failure     | 428.3  | ICD9  | Diastolic heart failure                                             |
| Heart failure     | 428.31 | ICD9  | Diastolic heart failure                                             |
| Heart failure     | 428.32 | ICD9  | Diastolic heart failure                                             |
| Heart failure     | 428.33 | ICD9  | Diastolic heart failure                                             |
| Heart failure     | 428.4  | ICD9  | Combined systolic and diastolic heart failure                       |
| Heart failure     | 428.4  | ICD9  | Combined systolic and diastolic heart failure                       |
| Heart failure     | 428.41 | ICD9  | Combined systolic and diastolic heart failure                       |
| Heart failure     | 428.42 | ICD9  | Combined systolic and diastolic heart failure                       |
| Heart failure     | 428.43 | ICD9  | Combined systolic and diastolic heart failure                       |
| Heart failure     | 428.9  | ICD9  | Heart failure unspecified                                           |
| Heart failure     | I50    | ICD10 | Heart failure                                                       |
| Heart failure     | I50.1  | ICD10 | Left ventricular failure                                            |
| Heart failure     | I50.2  | ICD10 | Systolic (congestive) heart failure                                 |
| Heart failure     | I50.20 | ICD10 | Unspecified systolic (congestive) heart failure                     |
| Heart failure     | I50.21 | ICD10 | Acute systolic (congestive) heart failure                           |
| Heart failure     | I50.22 | ICD10 | Chronic systolic (congestive) heart failure                         |
| Heart failure     | I50.23 | ICD10 | Acute on chronic systolic (congestive) heart failure                |

|               |         |       |                                                                                          |
|---------------|---------|-------|------------------------------------------------------------------------------------------|
| Heart failure | 150.3   | ICD10 | Diastolic (congestive) heart failure                                                     |
|               |         |       | Unspecified diastolic (congestive) heart failure                                         |
| Heart failure | 150.30  | ICD10 | failure                                                                                  |
| Heart failure | 150.31  | ICD10 | Acute diastolic (congestive) heart failure                                               |
|               |         |       |                                                                                          |
| Heart failure | 150.32  | ICD10 | Chronic diastolic (congestive) heart failure                                             |
|               |         |       | Acute on chronic diastolic (congestive) heart failure                                    |
| Heart failure | 150.33  | ICD10 | heart failure                                                                            |
|               |         |       | Combined systolic (congestive) and diastolic (congestive) heart failure                  |
| Heart failure | 150.4   | ICD10 |                                                                                          |
|               |         |       | Unspecified combined systolic (congestive) and diastolic (congestive) heart failure      |
| Heart failure | 150.40  | ICD10 | heart failure                                                                            |
|               |         |       | Acute combined systolic (congestive) and diastolic (congestive) heart failure            |
| Heart failure | 150.41  | ICD10 | heart failure                                                                            |
|               |         |       | Chronic combined systolic (congestive) and diastolic (congestive) heart failure          |
| Heart failure | 150.42  | ICD10 | and diastolic (congestive) heart failure                                                 |
|               |         |       | Acute on chronic combined systolic (congestive) and diastolic (congestive) heart failure |
| Heart failure | 150.43  | ICD10 | heart failure                                                                            |
| Heart failure | 150.8   | ICD10 | Other heart failure                                                                      |
| Heart failure | 150.81  | ICD10 | Right heart failure                                                                      |
| Heart failure | 150.810 | ICD10 | Right ventricular failure NOS                                                            |
| Heart failure | 150.811 | ICD10 | Acute right heart failure                                                                |
| Heart failure | 150.812 | ICD10 | Chronic right heart failure                                                              |
| Heart failure | 150.813 | ICD10 | Acute on chronic right heart failure                                                     |
|               |         |       | Right ventricular failure secondary to left ventricular failure                          |
| Heart failure | 150.814 | ICD10 | ventricular failure                                                                      |
| Heart failure | 150.82  | ICD10 | Biventricular heart failure                                                              |
| Heart failure | 150.83  | ICD10 | High output heart failure                                                                |
| Heart failure | 150.84  | ICD10 | Stage D heart failure                                                                    |
| Heart failure | 150.89  | ICD10 | Other heart failure                                                                      |
| Heart failure | 150.9   | ICD10 | Heart failure                                                                            |
| Hypertension  | 401     | ICD9  | Essential hypertension                                                                   |
| Hypertension  | 401.1   | ICD9  | Benign essential hypertension                                                            |
| Hypertension  | 401.9   | ICD9  | Hypertension NOS                                                                         |
| Hypertension  | 459.3   | ICD9  | Chronic venous hypertension (idiopathic)                                                 |
|               |         |       | Chronic venous hypertension without complications                                        |
| Hypertension  | 459.3   | ICD9  | complications                                                                            |
| Hypertension  | 459.31  | ICD9  | Chronic venous hypertension with ulcer                                                   |

|              |         |       |                                                                                         |
|--------------|---------|-------|-----------------------------------------------------------------------------------------|
| Hypertension | 459.32  | ICD9  | Chronic venous hypertension with inflammation                                           |
| Hypertension | 459.33  | ICD9  | Chronic venous hypertension with ulcer and inflammation                                 |
| Hypertension | 459.39  | ICD9  | Chronic venous hypertension with other complication                                     |
| Hypertension | 642     | ICD9  | Hypertension complicating pregnancy                                                     |
| Hypertension | 642.04  | ICD9  | Benign essential hypertension                                                           |
| Hypertension | 642.1   | ICD9  | Hypertension secondary to renal disease                                                 |
| Hypertension | 642.1   | ICD9  | Hypertension secondary to renal disease                                                 |
| Hypertension | 642.11  | ICD9  | Hypertension secondary to renal disease                                                 |
| Hypertension | 642.12  | ICD9  | Hypertension secondary to renal disease                                                 |
| Hypertension | 642.13  | ICD9  | Hypertension secondary to renal disease                                                 |
| Hypertension | 642.14  | ICD9  | Hypertension secondary to renal disease                                                 |
| Hypertension | 642.2   | ICD9  | Other pre-existing hypertension complicating pregnancy                                  |
| Hypertension | 642.2   | ICD9  | Other pre-existing hypertension complicating pregnancy                                  |
| Hypertension | 642.21  | ICD9  | Other pre-existing hypertension                                                         |
| Hypertension | 642.22  | ICD9  | Other pre-existing hypertension                                                         |
| Hypertension | 642.23  | ICD9  | Other pre-existing hypertension                                                         |
| Hypertension | 642.24  | ICD9  | Other pre-existing hypertension                                                         |
| Hypertension | 642.9   | ICD9  | Unspecified hypertension complicating pregnancy                                         |
| Hypertension | 642.9   | ICD9  | Unspecified hypertension complicating pregnancy                                         |
| Hypertension | 642.91  | ICD9  | Unspecified hypertension                                                                |
| Hypertension | 642.92  | ICD9  | Unspecified hypertension                                                                |
| Hypertension | 642.93  | ICD9  | Unspecified antepartum hypertension                                                     |
| Hypertension | 642.94  | ICD9  | Unspecified postpartum hypertension                                                     |
| Hypertension | 997.91  | ICD9  | Hypertension                                                                            |
| Hypertension | I10     | ICD10 | Essential (primary) hypertension                                                        |
| Hypertension | I27.0   | ICD10 | Primary pulmonary hypertension                                                          |
| Hypertension | I87.3   | ICD10 | Chronic venous hypertension (idiopathic)                                                |
| Hypertension | I87.30  | ICD10 | Chronic venous hypertension (idiopathic) without complications                          |
| Hypertension | I87.301 | ICD10 | Chronic venous hypertension (idiopathic) without complications of right lower extremity |

|              |         |       |                                                                                               |
|--------------|---------|-------|-----------------------------------------------------------------------------------------------|
| Hypertension | I87.302 | ICD10 | Chronic venous hypertension (idiopathic) without complications of left lower extremity        |
| Hypertension | I87.303 | ICD10 | Chronic venous hypertension (idiopathic) without complications of bilateral lower extremity   |
| Hypertension | I87.309 | ICD10 | Chronic venous hypertension (idiopathic) without complications of unspecified lower extremity |
| Hypertension | I87.31  | ICD10 | Chronic venous hypertension (idiopathic) with ulcer                                           |
| Hypertension | I87.311 | ICD10 | Chronic venous hypertension (idiopathic) with ulcer of right lower extremity                  |
| Hypertension | I87.312 | ICD10 | Chronic venous hypertension (idiopathic) with ulcer of left lower extremity                   |
| Hypertension | I87.313 | ICD10 | Chronic venous hypertension (idiopathic) with ulcer of bilateral lower extremity              |
| Hypertension | I87.319 | ICD10 | Chronic venous hypertension (idiopathic) with ulcer of unspecified lower extremity            |
| Hypertension | I87.32  | ICD10 | Chronic venous hypertension (idiopathic) with inflammation                                    |
| Hypertension | I87.321 | ICD10 | Chronic venous hypertension w inflammation of r low extrem                                    |
| Hypertension | I87.322 | ICD10 | Chronic venous hypertension (idiopathic) with inflammation of left lower extremity            |
| Hypertension | I87.323 | ICD10 | Chronic venous hypertension (idiopathic) with inflammation of bilateral lower extremity       |
| Hypertension | I87.329 | ICD10 | Chronic venous hypertension w inflammation of unsp low extrm                                  |
| Hypertension | I87.33  | ICD10 | Chronic venous hypertension (idiopathic) with ulcer and inflammation                          |
| Hypertension | I87.331 | ICD10 | Chronic venous hypertension (idiopathic) with ulcer and inflammation of right lower extremity |
| Hypertension | I87.332 | ICD10 | Chronic venous hypertension (idiopathic) with ulcer and inflammation of left lower extremity  |

|              |         |       |                                                                                                     |
|--------------|---------|-------|-----------------------------------------------------------------------------------------------------|
| Hypertension | I87.333 | ICD10 | Chronic venous hypertension (idiopathic) with ulcer and inflammation of bilateral lower extremity   |
| Hypertension | I87.339 | ICD10 | Chronic venous hypertension (idiopathic) with ulcer and inflammation of unspecified lower extremity |
| Hypertension | I87.39  | ICD10 | Chronic venous hypertension (idiopathic) with other complications                                   |
| Hypertension | I87.391 | ICD10 | Chronic venous hypertension with other complications of lower extremity                             |
| Hypertension | I87.392 | ICD10 | Chronic venous hypertension with other complications of lower extremity                             |
| Hypertension | I87.393 | ICD10 | Chronic venous hypertension (idiopathic) with other complications of bilateral lower extremity      |
| Hypertension | I87.399 | ICD10 | Chronic venous hypertension (idiopathic) with other complications of unspecified lower extremity    |
| Hypertension | O10.0   | ICD10 | Pre-existing hypertension complicating pregnancy                                                    |
| Hypertension | O10.0   | ICD10 | Pre-existing essential hypertension complicating pregnancy                                          |
| Hypertension | O10.01  | ICD10 | Pre-existing essential hypertension complicating pregnancy                                          |
| Hypertension | O10.011 | ICD10 | Pre-existing essential hypertension complicating pregnancy                                          |
| Hypertension | O10.012 | ICD10 | Pre-existing essential hypertension complicating pregnancy                                          |
| Hypertension | O10.013 | ICD10 | Pre-existing essential hypertension complicating pregnancy                                          |
| Hypertension | O10.019 | ICD10 | Pre-existing essential hypertension complicating pregnancy                                          |
| Hypertension | O10.02  | ICD10 | Pre-existing essential hypertension complicating childbirth                                         |
| Hypertension | O10.03  | ICD10 | Pre-existing essential hypertension complicating the puerperium                                     |
| Hypertension | O10.1   | ICD10 | Pre-existing hypertensive heart disease complicating pregnancy                                      |
| Hypertension | O10.11  | ICD10 | Pre-existing hypertensive heart disease complicating pregnancy                                      |

|              |         |       |                                                                                   |
|--------------|---------|-------|-----------------------------------------------------------------------------------|
| Hypertension | O10.111 | ICD10 | Pre-existing hypertensive heart disease complicating pregnancy                    |
| Hypertension | O10.112 | ICD10 | Pre-existing hypertensive heart disease complicating pregnancy                    |
| Hypertension | O10.113 | ICD10 | Pre-existing hypertensive heart disease complicating pregnancy                    |
| Hypertension | O10.119 | ICD10 | Pre-existing hypertensive heart disease complicating pregnancy                    |
| Hypertension | O10.12  | ICD10 | Pre-existing hypertensive heart disease complicating childbirth                   |
| Hypertension | O10.13  | ICD10 | Pre-existing hypertensive heart disease complicating the puerperium               |
| Hypertension | O10.2   | ICD10 | Pre-existing hypertensive chronic kidney disease complicating pregnancy           |
| Hypertension | O10.21  | ICD10 | Pre-existing hypertensive chronic kidney disease complicating pregnancy           |
| Hypertension | O10.211 | ICD10 | Pre-existing hypertensive chronic kidney disease complicating pregnancy           |
| Hypertension | O10.212 | ICD10 | Pre-existing hypertensive chronic kidney disease complicating pregnancy           |
| Hypertension | O10.213 | ICD10 | Pre-existing hypertensive chronic kidney disease complicating pregnancy           |
| Hypertension | O10.219 | ICD10 | Pre-existing hypertensive chronic kidney disease complicating pregnancy           |
| Hypertension | O10.22  | ICD10 | Pre-existing hypertensive chronic kidney disease complicating childbirth          |
| Hypertension | O10.23  | ICD10 | Pre-existing hypertensive chronic kidney disease complicating the puerperium      |
| Hypertension | O10.3   | ICD10 | Pre-existing hypertensive heart and chronic kidney disease complicating pregnancy |
| Hypertension | O10.31  | ICD10 | Pre-existing hypertensive heart and chronic kidney disease complicating pregnancy |
| Hypertension | O10.311 | ICD10 | Pre-existing hypertensive heart and chronic kidney disease complicating pregnancy |
| Hypertension | O10.312 | ICD10 | Pre-existing hypertensive heart and chronic kidney disease complicating pregnancy |

|              |         |       |                                                                                        |
|--------------|---------|-------|----------------------------------------------------------------------------------------|
| Hypertension | O10.313 | ICD10 | Pre-existing hypertensive heart and chronic kidney disease complicating pregnancy      |
| Hypertension | O10.319 | ICD10 | Pre-existing hypertensive heart and chronic kidney disease complicating pregnancy      |
| Hypertension | O10.32  | ICD10 | Pre-existing hypertensive heart and chronic kidney disease complicating childbirth     |
| Hypertension | O10.33  | ICD10 | Pre-existing hypertensive heart and chronic kidney disease complicating the puerperium |
| Hypertension | O10.4   | ICD10 | Pre-existing secondary hypertension complicating pregnancy                             |
| Hypertension | O10.41  | ICD10 | Pre-existing secondary hypertension complicating pregnancy                             |
| Hypertension | O10.411 | ICD10 | Pre-existing secondary hypertension complicating pregnancy                             |
| Hypertension | O10.412 | ICD10 | Pre-existing secondary hypertension complicating pregnancy                             |
| Hypertension | O10.413 | ICD10 | Pre-existing secondary hypertension complicating pregnancy                             |
| Hypertension | O10.419 | ICD10 | Pre-existing secondary hypertension complicating pregnancy                             |
| Hypertension | O10.42  | ICD10 | Pre-existing secondary hypertension complicating childbirth                            |
| Hypertension | O10.43  | ICD10 | Pre-existing secondary hypertension complicating the puerperium                        |
| Hypertension | O10.9   | ICD10 | Unspecified pre-existing hypertension complicating pregnancy                           |
| Hypertension | O10.91  | ICD10 | Unspecified pre-existing hypertension complicating pregnancy                           |
| Hypertension | O10.911 | ICD10 | Unspecified pre-existing hypertension complicating pregnancy                           |
| Hypertension | O10.912 | ICD10 | Unspecified pre-existing hypertension complicating pregnancy                           |
| Hypertension | O10.913 | ICD10 | Unspecified pre-existing hypertension complicating pregnancy                           |
| Hypertension | O10.919 | ICD10 | Unspecified pre-existing hypertension complicating pregnancy                           |

|              |        |       |                                                                              |
|--------------|--------|-------|------------------------------------------------------------------------------|
| Hypertension | O10.92 | ICD10 | Unspecified pre-existing hypertension complicating childbirth                |
| Hypertension | O10.93 | ICD10 | Unspecified pre-existing hypertension complicating the puerperium            |
| Hypertension | O13    | ICD10 | Gestational [pregnancy-induced] hypertension without significant proteinuria |
| Hypertension | O13.1  | ICD10 | Gestational [pregnancy-induced] hypertension without significant proteinuria |
| Hypertension | O13.2  | ICD10 | Gestational [pregnancy-induced] hypertension without significant proteinuria |
| Hypertension | O13.3  | ICD10 | Gestational [pregnancy-induced] hypertension without significant proteinuria |
| Hypertension | O13.4  | ICD10 | Gestatnl htn without significant protein                                     |
| Hypertension | O13.5  | ICD10 | Gestatnl htn without significant protein                                     |
| Hypertension | O13.9  | ICD10 | Gestational [pregnancy-induced] hypertension without significant proteinuria |
| Hypertension | O16    | ICD10 | Unspecified maternal hypertension                                            |
| Hypertension | O16.1  | ICD10 | Unspecified maternal hypertension                                            |
| Hypertension | O16.2  | ICD10 | Unspecified maternal hypertension                                            |
| Hypertension | O16.3  | ICD10 | Unspecified maternal hypertension                                            |
| Hypertension | O16.4  | ICD10 | Unspecified maternal hypertension                                            |
| Hypertension | O16.5  | ICD10 | Unspecified maternal hypertension                                            |
| Hypertension | O16.9  | ICD10 | Unspecified maternal hypertension                                            |
| Stroke       | 430    | ICD9  | Subarachnoid hemorrhage                                                      |
| Stroke       | 430    | ICD9  | Subarachnoid hemorrhage **                                                   |
| Stroke       | 431    | ICD9  | Intracerebral hemorrhage                                                     |
| Stroke       | 431    | ICD9  | Intracerebral hemorrhage **                                                  |
| Stroke       | 432    | ICD9  | Other and unspecified intracranial hemorrhage                                |
| Stroke       | 432    | ICD9  | Nontraumatic extradural hemorrhage                                           |
| Stroke       | 432.1  | ICD9  | Subdural hemorrhage                                                          |
| Stroke       | 432.9  | ICD9  | Unspecified intracranial hemorrhage                                          |
| Stroke       | 433    | ICD9  | Occlusion and stenosis of precerebral arteries                               |
| Stroke       | 433    | ICD9  | Occlusion and stenosis of basilar artery                                     |



|        |        |      |                                                                       |
|--------|--------|------|-----------------------------------------------------------------------|
| Stroke | 433    | ICD9 | Occlusion and stenosis of basilar artery                              |
| Stroke | 433.01 | ICD9 | Occlusion and stenosis of basilar artery                              |
| Stroke | 433.1  | ICD9 | Occlusion and stenosis of carotid artery                              |
| Stroke | 433.1  | ICD9 | Occlusion and stenosis of carotid artery                              |
| Stroke | 433.11 | ICD9 | Occlusion and stenosis of carotid artery                              |
| Stroke | 433.2  | ICD9 | Occlusion and stenosis of vertebral artery                            |
| Stroke | 433.2  | ICD9 | Occlusion and stenosis of vertebral artery                            |
| Stroke | 433.21 | ICD9 | Occlusion and stenosis of vertebral artery                            |
| Stroke | 433.3  | ICD9 | Occlusion and stenosis of multiple and bilateral precerebral arteries |
| Stroke | 433.3  | ICD9 | Occlusion and stenosis of multiple and bilateral precerebral arteries |
| Stroke | 433.31 | ICD9 | Occlusion and stenosis of multiple and bilateral precerebral arteries |
| Stroke | 433.8  | ICD9 | Occlusion and stenosis of other specified precerebral artery          |
| Stroke | 433.8  | ICD9 | Occlusion and stenosis of other specified precerebral artery          |
| Stroke | 433.81 | ICD9 | Occlusion and stenosis of other specified precerebral artery          |
| Stroke | 433.9  | ICD9 | Occlusion and stenosis of unspecified precerebral artery              |
| Stroke | 433.9  | ICD9 | Occlusion and stenosis of unspecified precerebral artery              |
| Stroke | 433.91 | ICD9 | Unspecified precerebral artery                                        |
| Stroke | 434    | ICD9 | Occlusion of cerebral arteries                                        |
| Stroke | 434    | ICD9 | Cerebral thrombosis                                                   |
| Stroke | 434    | ICD9 | Cerebral thrombosis                                                   |
| Stroke | 434.01 | ICD9 | Cerebral thrombosis                                                   |
| Stroke | 434.1  | ICD9 | Cerebral embolism                                                     |
| Stroke | 434.1  | ICD9 | Cerebral embolism                                                     |
| Stroke | 434.11 | ICD9 | Cerebral embolism                                                     |
| Stroke | 434.9  | ICD9 | Cerebral artery occlusion                                             |
| Stroke | 434.9  | ICD9 | Cerebral artery occlusion                                             |
| Stroke | 434.91 | ICD9 | Cerebral artery occlusion                                             |
| Stroke | 437.1  | ICD9 | Other generalized ischemic cerebrovascular disease                    |

|        |         |       |                                                                       |
|--------|---------|-------|-----------------------------------------------------------------------|
| Stroke | I63     | ICD10 | Cerebral infarction                                                   |
| Stroke | I63.6   | ICD10 | Cerebral infarction due to cerebral venous thrombosis                 |
| Stroke | I63.42  | ICD10 | Cerebral infarction due to embolism of anterior cerebral artery       |
| Stroke | I63.12  | ICD10 | Cerebral infarction due to embolism of basilar artery                 |
| Stroke | I63.113 | ICD10 | Cerebral infarction due to embolism of bilateral vertebral arteries   |
| Stroke | I63.13  | ICD10 | Cerebral infarction due to embolism of carotid artery                 |
| Stroke | I63.44  | ICD10 | Cerebral infarction due to embolism of cerebellar artery              |
| Stroke | I63.4   | ICD10 | Cerebral infarction due to embolism of cerebral arteries              |
| Stroke | I63.422 | ICD10 | Cerebral infarction due to embolism of left anterior cerebral artery  |
| Stroke | I63.132 | ICD10 | Cerebral infarction due to embolism of left carotid artery            |
| Stroke | I63.442 | ICD10 | Cerebral infarction due to embolism of left cerebellar artery         |
| Stroke | I63.412 | ICD10 | Cerebral infarction due to embolism of left middle cerebral artery    |
| Stroke | I63.432 | ICD10 | Cerebral infarction due to embolism of left posterior cerebral artery |
| Stroke | I63.112 | ICD10 | Cerebral infarction due to embolism of left vertebral artery          |
| Stroke | I63.41  | ICD10 | Cerebral infarction due to embolism of middle cerebral artery         |
| Stroke | I63.49  | ICD10 | Cerebral infarction due to embolism of other cerebral artery          |
| Stroke | I63.19  | ICD10 | Cerebral infarction due to embolism of other precerebral artery       |
| Stroke | I63.43  | ICD10 | Cerebral infarction due to embolism of posterior cerebral artery      |
| Stroke | I63.1   | ICD10 | Cerebral infarction due to embolism of precerebral arteries           |
| Stroke | I63.421 | ICD10 | Cerebral infarction due to embolism of right anterior cerebral artery |

|        |         |       |                                                                              |
|--------|---------|-------|------------------------------------------------------------------------------|
| Stroke | I63.131 | ICD10 | Cerebral infarction due to embolism of right carotid artery                  |
| Stroke | I63.441 | ICD10 | Cerebral infarction due to embolism of right cerebellar artery               |
| Stroke | I63.411 | ICD10 | Cerebral infarction due to embolism of right middle cerebral artery          |
| Stroke | I63.431 | ICD10 | Cerebral infarction due to embolism of right posterior cerebral artery       |
| Stroke | I63.111 | ICD10 | Cerebral infarction due to embolism of right vertebral artery                |
| Stroke | I63.429 | ICD10 | Cerebral infarction due to embolism of unspecified anterior cerebral artery  |
| Stroke | I63.139 | ICD10 | Cerebral infarction due to embolism of unspecified carotid artery            |
| Stroke | I63.449 | ICD10 | Cerebral infarction due to embolism of unspecified cerebellar artery         |
| Stroke | I63.40  | ICD10 | Cerebral infarction due to embolism of unspecified cerebral artery           |
| Stroke | I63.419 | ICD10 | Cerebral infarction due to embolism of unspecified middle cerebral artery    |
| Stroke | I63.439 | ICD10 | Cerebral infarction due to embolism of unspecified posterior cerebral artery |
| Stroke | I63.10  | ICD10 | Cerebral infarction due to embolism of unspecified precerebral artery        |
| Stroke | I63.119 | ICD10 | Cerebral infarction due to embolism of unspecified vertebral artery          |
| Stroke | I63.11  | ICD10 | Cerebral infarction due to embolism of vertebral artery                      |
| Stroke | I63.32  | ICD10 | Cerebral infarction due to thrombosis of anterior cerebral artery            |
| Stroke | I63.02  | ICD10 | Cerebral infarction due to thrombosis of basilar artery                      |
| Stroke | I63.03  | ICD10 | Cerebral infarction due to thrombosis of carotid artery                      |
| Stroke | I63.34  | ICD10 | Cerebral infarction due to thrombosis of cerebellar artery                   |
| Stroke | I63.3   | ICD10 | Cerebral infarction due to thrombosis of cerebral arteries                   |
| Stroke | I63.322 | ICD10 | Cerebral infarction due to thrombosis of left anterior cerebral artery       |

|        |         |       |                                                                               |
|--------|---------|-------|-------------------------------------------------------------------------------|
| Stroke | I63.032 | ICD10 | Cerebral infarction due to thrombosis of left carotid artery                  |
| Stroke | I63.342 | ICD10 | Cerebral infarction due to thrombosis of left cerebellar artery               |
| Stroke | I63.312 | ICD10 | Cerebral infarction due to thrombosis of left middle cerebral artery          |
| Stroke | I63.332 | ICD10 | Cerebral infarction due to thrombosis of left posterior cerebral artery       |
| Stroke | I63.012 | ICD10 | Cerebral infarction due to thrombosis of left vertebral artery                |
| Stroke | I63.31  | ICD10 | Cerebral infarction due to thrombosis of middle cerebral artery               |
| Stroke | I63.39  | ICD10 | Cerebral infarction due to thrombosis of other cerebral artery                |
| Stroke | I63.09  | ICD10 | Cerebral infarction due to thrombosis of other precerebral artery             |
| Stroke | I63.33  | ICD10 | Cerebral infarction due to thrombosis of posterior cerebral artery            |
| Stroke | I63.0   | ICD10 | Cerebral infarction due to thrombosis of precerebral arteries                 |
| Stroke | I63.321 | ICD10 | Cerebral infarction due to thrombosis of right anterior cerebral artery       |
| Stroke | I63.031 | ICD10 | Cerebral infarction due to thrombosis of right carotid artery                 |
| Stroke | I63.341 | ICD10 | Cerebral infarction due to thrombosis of right cerebellar artery              |
| Stroke | I63.311 | ICD10 | Cerebral infarction due to thrombosis of right middle cerebral artery         |
| Stroke | I63.331 | ICD10 | Cerebral infarction due to thrombosis of right posterior cerebral artery      |
| Stroke | I63.011 | ICD10 | Cerebral infarction due to thrombosis of right vertebral artery               |
| Stroke | I63.329 | ICD10 | Cerebral infarction due to thrombosis of unspecified anterior cerebral artery |
| Stroke | I63.039 | ICD10 | Cerebral infarction due to thrombosis of unspecified carotid artery           |
| Stroke | I63.349 | ICD10 | Cerebral infarction due to thrombosis of unspecified cerebellar artery        |
| Stroke | I63.30  | ICD10 | Cerebral infarction due to thrombosis of unspecified cerebral artery          |

|        |         |       |                                                                                                       |
|--------|---------|-------|-------------------------------------------------------------------------------------------------------|
| Stroke | I63.319 | ICD10 | Cerebral infarction due to thrombosis of unspecified middle cerebral artery                           |
| Stroke | I63.339 | ICD10 | Cerebral infarction due to thrombosis of unspecified posterior cerebral artery                        |
| Stroke | I63.00  | ICD10 | Cerebral infarction due to thrombosis of unspecified precerebral artery                               |
| Stroke | I63.019 | ICD10 | Cerebral infarction due to thrombosis of unspecified vertebral artery                                 |
| Stroke | I63.01  | ICD10 | Cerebral infarction due to thrombosis of vertebral artery                                             |
| Stroke | I63.52  | ICD10 | Cerebral infarction due to unspecified occlusion or stenosis of anterior cerebral artery              |
| Stroke | I63.22  | ICD10 | Cerebral infarction due to unspecified occlusion or stenosis of basilar arteries                      |
| Stroke | I63.523 | ICD10 | Cerebral infarction due to unspecified occlusion or stenosis of bilateral anterior cerebral arteries  |
| Stroke | I63.233 | ICD10 | Cerebral infarction due to unspecified occlusion or stenosis of bilateral carotid arteries            |
| Stroke | I63.543 | ICD10 | Cerebral infarction due to unspecified occlusion or stenosis of bilateral cerebellar arteries         |
| Stroke | I63.513 | ICD10 | Cerebral infarction due to unspecified occlusion or stenosis of bilateral middle cerebral arteries    |
| Stroke | I63.533 | ICD10 | Cerebral infarction due to unspecified occlusion or stenosis of bilateral posterior cerebral arteries |
| Stroke | I63.213 | ICD10 | Cerebral infarction due to unspecified occlusion or stenosis of bilateral vertebral arteries          |
| Stroke | I63.23  | ICD10 | Cerebral infarction due to unspecified occlusion or stenosis of carotid arteries                      |
| Stroke | I63.54  | ICD10 | Cerebral infarction due to unspecified occlusion or stenosis of cerebellar artery                     |
| Stroke | I63.5   | ICD10 | Cerebral infarction due to unspecified occlusion or stenosis of cerebral arteries                     |

|        |         |       |                                                                                                |
|--------|---------|-------|------------------------------------------------------------------------------------------------|
| Stroke | I63.522 | ICD10 | Cerebral infarction due to unspecified occlusion or stenosis of left anterior cerebral artery  |
| Stroke | I63.232 | ICD10 | Cerebral infarction due to unspecified occlusion or stenosis of left carotid arteries          |
| Stroke | I63.542 | ICD10 | Cerebral infarction due to unspecified occlusion or stenosis of left cerebellar artery         |
| Stroke | I63.512 | ICD10 | Cerebral infarction due to unspecified occlusion or stenosis of left middle cerebral artery    |
| Stroke | I63.532 | ICD10 | Cerebral infarction due to unspecified occlusion or stenosis of left posterior cerebral artery |
| Stroke | I63.212 | ICD10 | Cerebral infarction due to unspecified occlusion or stenosis of left vertebral arteries        |
| Stroke | I63.51  | ICD10 | Cerebral infarction due to unspecified occlusion or stenosis of middle cerebral artery         |
| Stroke | I63.59  | ICD10 | Cerebral infarction due to unspecified occlusion or stenosis of other cerebral artery          |
| Stroke | I63.29  | ICD10 | Cerebral infarction due to unspecified occlusion or stenosis of other precerebral arteries     |
| Stroke | I63.53  | ICD10 | Cerebral infarction due to unspecified occlusion or stenosis of posterior cerebral artery      |
| Stroke | I63.2   | ICD10 | Cerebral infarction due to unspecified occlusion or stenosis of precerebral arteries           |
| Stroke | I63.521 | ICD10 | Cerebral infarction due to unspecified occlusion or stenosis of right anterior cerebral artery |
| Stroke | I63.231 | ICD10 | Cerebral infarction due to unspecified occlusion or stenosis of right carotid arteries         |

|        |         |       |                                                                                                       |
|--------|---------|-------|-------------------------------------------------------------------------------------------------------|
| Stroke | I63.541 | ICD10 | Cerebral infarction due to unspecified occlusion or stenosis of right cerebellar artery               |
| Stroke | I63.511 | ICD10 | Cerebral infarction due to unspecified occlusion or stenosis of right middle cerebral artery          |
| Stroke | I63.531 | ICD10 | Cerebral infarction due to unspecified occlusion or stenosis of right posterior cerebral artery       |
| Stroke | I63.211 | ICD10 | Cerebral infarction due to unspecified occlusion or stenosis of right vertebral arteries              |
| Stroke | I63.529 | ICD10 | Cerebral infarction due to unspecified occlusion or stenosis of unspecified anterior cerebral artery  |
| Stroke | I63.239 | ICD10 | Cerebral infarction due to unspecified occlusion or stenosis of unspecified carotid arteries          |
| Stroke | I63.549 | ICD10 | Cerebral infarction due to unspecified occlusion or stenosis of unspecified cerebellar artery         |
| Stroke | I63.50  | ICD10 | Cerebral infarction due to unspecified occlusion or stenosis of unspecified cerebral artery           |
| Stroke | I63.519 | ICD10 | Cerebral infarction due to unspecified occlusion or stenosis of unspecified middle cerebral artery    |
| Stroke | I63.539 | ICD10 | Cerebral infarction due to unspecified occlusion or stenosis of unspecified posterior cerebral artery |
| Stroke | I63.20  | ICD10 | Cerebral infarction due to unspecified occlusion or stenosis of unspecified precerebral arteries      |
| Stroke | I63.219 | ICD10 | Cerebral infarction due to unspecified occlusion or stenosis of unspecified vertebral arteries        |
| Stroke | I63.21  | ICD10 | Cerebral infarction due to unspecified occlusion or stenosis of vertebral arteries                    |
| Stroke | I63.9   | ICD10 | Cerebral infarction                                                                                   |
| Stroke | I63.423 | ICD10 | Cerebral infrc due to embolism of bi ant cerebral arteries                                            |

|        |         |       |                                                              |
|--------|---------|-------|--------------------------------------------------------------|
| Stroke | I63.413 | ICD10 | Cerebral infrc due to embolism of bi middle cerebral art     |
| Stroke | I63.433 | ICD10 | Cerebral infrc due to embolism of bi post cerebral arteries  |
| Stroke | I63.133 | ICD10 | Cerebral infrc due to embolism of bilateral carotid arteries |
| Stroke | I63.443 | ICD10 | Cerebral infrc due to embolism of bilateral cereblr arteries |
| Stroke | I63.323 | ICD10 | Cerebral infrc due to thombos of bi ant cerebral arteries    |
| Stroke | I63.313 | ICD10 | Cerebral infrc due to thombos of bi middle cerebral arteries |
| Stroke | I63.333 | ICD10 | Cerebral infrc to thombos of bi posterior cerebral arteries  |
| Stroke | I63.343 | ICD10 | Cerebral infrc to thrombosis of bilateral cereblr arteries   |
| Stroke | I63.8   | ICD10 | Other cerebral infarction                                    |
| Stroke | I61     | ICD10 | Nontraumatic intracerebral hemorrhage                        |
| Stroke | I61.3   | ICD10 | Nontraumatic intracerebral hemorrhage in brain stem          |
| Stroke | I61.4   | ICD10 | Nontraumatic intracerebral hemorrhage in cerebellum          |
| Stroke | I61.1   | ICD10 | Nontraumatic intracerebral hemorrhage in hemisphere          |
| Stroke | I61.0   | ICD10 | Nontraumatic intracerebral hemorrhage in hemisphere          |
| Stroke | I61.2   | ICD10 | Nontraumatic intracerebral hemorrhage in hemisphere          |
| Stroke | I61.5   | ICD10 | Nontraumatic intracerebral hemorrhage                        |
| Stroke | I61.6   | ICD10 | Nontraumatic intracerebral hemorrhage                        |
| Stroke | I61.9   | ICD10 | Nontraumatic intracerebral hemorrhage                        |
| Stroke | I61.8   | ICD10 | Other nontraumatic intracerebral hemorrhage                  |
| Stroke | I67.81  | ICD10 | Acute cerebrovascular insufficiency                          |



**STROBE 2007 (v4) checklist of items to be included in reports of observational studies in epidemiology\***  
**Checklist for cohort, case-control, and cross-sectional studies (combined)**

| Section/Topic             | Item # | Recommendation                                                                                                                                                                                                                                                                                                                                                                                                                                                         | Reported on page # |
|---------------------------|--------|------------------------------------------------------------------------------------------------------------------------------------------------------------------------------------------------------------------------------------------------------------------------------------------------------------------------------------------------------------------------------------------------------------------------------------------------------------------------|--------------------|
| Title and abstract        | 1      | (a) Indicate the study's design with a commonly used term in the title or the abstract                                                                                                                                                                                                                                                                                                                                                                                 | 1                  |
|                           |        | (b) Provide in the abstract an informative and balanced summary of what was done and what was found                                                                                                                                                                                                                                                                                                                                                                    | 3                  |
| <b>Introduction</b>       |        |                                                                                                                                                                                                                                                                                                                                                                                                                                                                        |                    |
| Background/rationale      | 2      | Explain the scientific background and rationale for the investigation being reported                                                                                                                                                                                                                                                                                                                                                                                   | 3                  |
| Objectives                | 3      | State specific objectives, including any pre-specified hypotheses                                                                                                                                                                                                                                                                                                                                                                                                      | 3                  |
| <b>Methods</b>            |        |                                                                                                                                                                                                                                                                                                                                                                                                                                                                        |                    |
| Study design              | 4      | Present key elements of study design early in the paper                                                                                                                                                                                                                                                                                                                                                                                                                | 4                  |
| Setting                   | 5      | Describe the setting, locations, and relevant dates, including periods of recruitment, exposure, follow-up, and data collection                                                                                                                                                                                                                                                                                                                                        | 4                  |
| Participants              | 6      | (a) <i>Cohort study</i> —Give the eligibility criteria, and the sources and methods of selection of participants. Describe methods of follow-up<br><i>Case-control study</i> —Give the eligibility criteria, and the sources and methods of case ascertainment and control selection. Give the rationale for the choice of cases and controls<br><i>Cross-sectional study</i> —Give the eligibility criteria, and the sources and methods of selection of participants | 4                  |
|                           |        | (b) <i>Cohort study</i> —For matched studies, give matching criteria and number of exposed and unexposed<br><i>Case-control study</i> —For matched studies, give matching criteria and the number of controls per case                                                                                                                                                                                                                                                 | 4                  |
| Variables                 | 7      | Clearly define all outcomes, exposures, predictors, potential confounders, and effect modifiers. Give diagnostic criteria, if applicable                                                                                                                                                                                                                                                                                                                               | 5                  |
| Data sources/ measurement | 8*     | For each variable of interest, give sources of data and details of methods of assessment (measurement). Describe comparability of assessment methods if there is more than one group                                                                                                                                                                                                                                                                                   | 4                  |
| Bias                      | 9      | Describe any efforts to address potential sources of bias                                                                                                                                                                                                                                                                                                                                                                                                              | 4                  |
| Study size                | 10     | Explain how the study size was arrived at                                                                                                                                                                                                                                                                                                                                                                                                                              | 4                  |
| Quantitative variables    | 11     | Explain how quantitative variables were handled in the analyses. If applicable, describe which groupings were chosen and why                                                                                                                                                                                                                                                                                                                                           | 4                  |
| Statistical methods       | 12     | (a) Describe all statistical methods, including those used to control for confounding                                                                                                                                                                                                                                                                                                                                                                                  | 4                  |
|                           |        | (b) Describe any methods used to examine subgroups and interactions                                                                                                                                                                                                                                                                                                                                                                                                    | 5                  |
|                           |        | (c) Explain how missing data were addressed                                                                                                                                                                                                                                                                                                                                                                                                                            | NA                 |
|                           |        | (d) <i>Cohort study</i> —If applicable, explain how loss to follow-up was addressed<br><i>Case-control study</i> —If applicable, explain how matching of cases and controls was addressed                                                                                                                                                                                                                                                                              | NA                 |

|                          |     |                                                                                                                                                                                                              |       |
|--------------------------|-----|--------------------------------------------------------------------------------------------------------------------------------------------------------------------------------------------------------------|-------|
|                          |     | <i>Cross-sectional study</i> —If applicable, describe analytical methods taking account of sampling strategy                                                                                                 |       |
|                          |     | (e) Describe any sensitivity analyses                                                                                                                                                                        | NA    |
| <b>Results</b>           |     |                                                                                                                                                                                                              |       |
| Participants             | 13* | (a) Report numbers of individuals at each stage of study—eg numbers potentially eligible, examined for eligibility, confirmed eligible, included in the study, completing follow-up, and analysed            | 5     |
|                          |     | (b) Give reasons for non-participation at each stage                                                                                                                                                         | NA    |
|                          |     | (c) Consider use of a flow diagram                                                                                                                                                                           | NA    |
| Descriptive data         | 14* | (a) Give characteristics of study participants (eg demographic, clinical, social) and information on exposures and potential confounders                                                                     | 5     |
|                          |     | (b) Indicate number of participants with missing data for each variable of interest                                                                                                                          | 5     |
|                          |     | (c) <i>Cohort study</i> —Summarise follow-up time (eg, average and total amount)                                                                                                                             | 5     |
| Outcome data             | 15* | <i>Cohort study</i> —Report numbers of outcome events or summary measures over time                                                                                                                          |       |
|                          |     | <i>Case-control study</i> —Report numbers in each exposure category, or summary measures of exposure                                                                                                         | 5     |
|                          |     | <i>Cross-sectional study</i> —Report numbers of outcome events or summary measures                                                                                                                           |       |
| Main results             | 16  | (a) Give unadjusted estimates and, if applicable, confounder-adjusted estimates and their precision (eg, 95% confidence interval). Make clear which confounders were adjusted for and why they were included | 10-19 |
|                          |     | (b) Report category boundaries when continuous variables were categorized                                                                                                                                    | 10-19 |
|                          |     | (c) If relevant, consider translating estimates of relative risk into absolute risk for a meaningful time period                                                                                             | NA    |
| Other analyses           | 17  | Report other analyses done—eg analyses of subgroups and interactions, and sensitivity analyses                                                                                                               | NA    |
| <b>Discussion</b>        |     |                                                                                                                                                                                                              |       |
| Key results              | 18  | Summarise key results with reference to study objectives                                                                                                                                                     | 7-9   |
| Limitations              | 19  | Discuss limitations of the study, taking into account sources of potential bias or imprecision. Discuss both direction and magnitude of any potential bias                                                   | 8-9   |
| Interpretation           | 20  | Give a cautious overall interpretation of results considering objectives, limitations, multiplicity of analyses, results from similar studies, and other relevant evidence                                   | 9     |
| Generalisability         | 21  | Discuss the generalisability (external validity) of the study results                                                                                                                                        | 9     |
| <b>Other information</b> |     |                                                                                                                                                                                                              |       |
| Funding                  | 22  | Give the source of funding and the role of the funders for the present study and, if applicable, for the original study on which the present article is based                                                | 2     |

\*Give information separately for cases and controls in case-control studies and, if applicable, for exposed and unexposed groups in cohort and cross-sectional studies.

**Note:** An Explanation and Elaboration article discusses each checklist item and gives methodological background and published examples of transparent reporting. The STROBE checklist is best used in conjunction with this article (freely available on the Web sites of PLoS Medicine at <http://www.plosmedicine.org/>, Annals of Internal Medicine at <http://www.annals.org/>, and Epidemiology at <http://www.epidem.com/>). Information on the STROBE Initiative is available at [www.strobe-statement.org](http://www.strobe-statement.org).
