# Supplementary material for: Retrospective cohort study of clinical characteristics of 2199 hospitalised patients with COVID-19 in New York City
Source: PubMed Central journal article supplement — BMJ Open. 2020 Nov 27;10(11):e040736. doi: 10.1136/bmjopen-2020-040736 (PMC7702220; doi:10.1136/bmjopen-2020-040736), 2020-11-27
Supplement: bmjopen-2020-040736supp005.pdf [file bmjopen-2020-040736supp005.pdf]

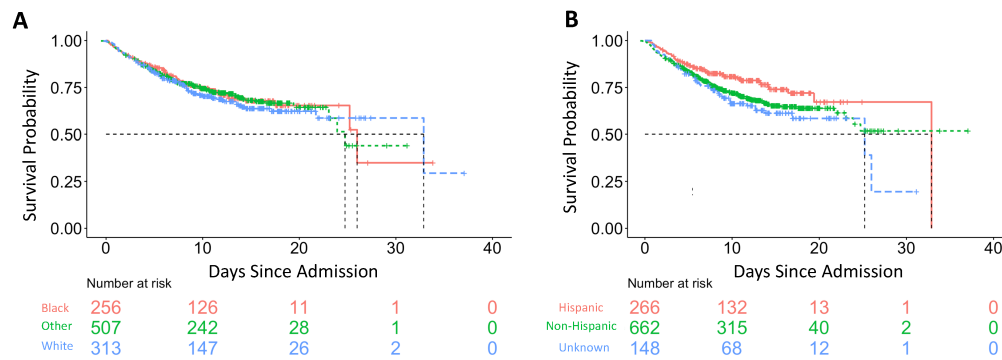

**Supplementary Figure 3** Kaplan Meier curve stratified by A) self-reported race and B) ethnicity. Individuals were censored if they were hospitalized at the time of data-freeze.

**Supplementary Table 1** Diagnostic codes used to identify clinical comorbidities. Patients were determined to have a history of a clinical condition if they had at least one diagnostic code for the specific condition in their electronic health record.
